# Supplementary material for: Designing of a mini-core that effectively represents 3004 diverse accessions of rice
Source: bioRxiv or medRxiv preprint supplement (doi:10.1101/762070), 2019-09-09
Supplement: Supplementary file [file media-1.pdf]

## **Supplemental Tables**

**Supplemental Table S1**

**Supplemental Table S2**

**Supplemental Table S3**

**Supplemental Table S4**

**Supplemental Table S5**

**Supplemental Table S6**

**Supplemental Table S7**

**Supplemental Table S8**

**Supplemental Table S9**

**Supplemental Table S10**

**Supplemental Table S11**

**Supplemental Table S12**

**Supplemental Table S13 (Excel sheet, uploaded separately)**

**Supplemental Table S14**

**Supplemental Table S1:** Range of quantitative traits in original collection and different core collections.

| Traits                            | Original collection (3004 acc) |      | CC1 (231acc) |      | CC2 (300 acc) |      | Merged CC1 & CC2 (503 acc) |      | CC3 (503 + 17 = 520 acc) |      |
|-----------------------------------|--------------------------------|------|--------------|------|---------------|------|----------------------------|------|--------------------------|------|
|                                   | Max                            | Min  | Max          | Min  | Max           | Min  | Max                        | Min  | Max                      | Min  |
| Days to 80% flowering             | 184                            | 50   | 175          | 50   | 175           | 52   | 175                        | 50   | 184                      | 50   |
| 100 GW (gm)                       | 5                              | 0.98 | 4.6          | 0.98 | 4.6           | 0.98 | 4.6                        | 0.98 | 5                        | 0.98 |
| Days to 1 <sup>st</sup> flowering | 182                            | 45   | 171          | 46   | 171           | 45   | 171                        | 45   | 182                      | 45   |
| Grain length (mm)                 | 12.7                           | 4.4  | 12.7         | 4.4  | 12.4          | 4.4  | 12.7                       | 4.4  | 12.7                     | 4.4  |
| Grain width (mm)                  | 4.4                            | 1.5  | 4.1          | 1.7  | 4.3           | 2.1  | 4.4                        | 1.7  | 4.4                      | 1.5  |
| Panicle length (cm)               | 37                             | 13   | 36           | 13   | 36            | 13   | 36                         | 13   | 37                       | 13   |
| Seed coat color                   | 99                             | 10   | 88           | 10   | 99            | 10   | 99                         | 10   | 99                       | 10   |
| Seedling height (cm)              | 74                             | 12   | 71           | 16   | 74            | 13   | 74                         | 13   | 74                       | 12   |
| Culm length (cm)                  | 204                            | 27   | 204          | 35   | 181           | 27   | 204                        | 27   | 204                      | 27   |
| Culm number                       | 40                             | 5    | 40           | 6    | 33            | 5    | 40                         | 5    | 40                       | 5    |
| Culm diameter (mm)                | 9.1                            | 2    | 9.1          | 2    | 7.7           | 3    | 9.1                        | 2    | 9.1                      | 2    |

Highlighted traits were not picked up for their complete range in any mini-core collection (CC1, CC2 and CC3). Seventeen accessions were included in CC3 (503+17 = 520 accessions) to cover the entire range for all the traits with respect to original collection.

**Supplemental Table S2:** Assessment of mini-core collections for various evaluation indices using phenotypic data.

| Core collection | MD%  | VD%   | VR%    | CR%  | H    | I    |
|-----------------|------|-------|--------|------|------|------|
| CC1 (231 acc)   | 4.08 | 39.77 | 86     | 92   | 2.25 | 0.79 |
| CC2 (300 acc)   | 2.8  | 19.78 | 107.68 | 91.1 | 1.98 | 0.77 |
| CC3 (520 acc)   | 2.9  | 18.9  | 109.3  | 96.2 | 2.17 | 0.79 |

MD% (Mean difference percentage), VD% variance difference percentage, VR % (Variable rate of coefficient of variance), CR% (coincidence rate of range), H (Shannon diversity index), I (Nei's diversity index)

**Supplemental Table S3:** Distribution of accessions from different varietal groups in different mini-core collections to check proportionate representation from original collection.

| <b>Core/varietal group</b>     | <i>indica</i>         | <b>Tropical japonica</b> | <b>Temperate japonica</b> | <i>japonica</i>      | <i>aus/boro</i>      | <b>Intermediate</b>  | <b>Aromatic (Basmati)</b> |
|--------------------------------|-----------------------|--------------------------|---------------------------|----------------------|----------------------|----------------------|---------------------------|
| Original collection (3004 acc) | <b>1743</b>           | <b>388</b>               | <b>320</b>                | <b>132</b>           | <b>215</b>           | <b>135</b>           | <b>71</b>                 |
| CC1 (231 acc)                  | <b>129</b><br>(7.4%)  | <b>15</b><br>(3.8%)      | <b>38</b><br>(11.9%)      | <b>14</b><br>(10.6%) | <b>11</b><br>(5.1%)  | <b>19</b><br>(14%)   | <b>5</b><br>(7%)          |
| CC2 (300 acc)                  | <b>171</b><br>(9.8%)  | <b>10</b><br>(2.5%)      | <b>8</b><br>(2.5%)        | <b>12</b><br>(9.1%)  | <b>42</b><br>(19.5%) | <b>45</b><br>(33.3%) | <b>12</b><br>(16.9%)      |
| CC3 (520 acc)                  | <b>295</b><br>(16.9%) | <b>27</b><br>(6.9%)      | <b>44</b><br>(13.4%)      | <b>23</b><br>(17.4%) | <b>55</b><br>(25.6%) | <b>61</b><br>(44.4%) | <b>15</b><br>(21%)        |

**Supplemental Table S4:** Distribution of accessions from different regional gene pools in different mini-core collections to check proportionate representation from original collection.

| <b>Core/Regions</b>            | <b>South-Asia</b>     | <b>South East-Asia</b> | <b>China</b>           | <b>Africa</b>       | <b>America</b>       | <b>Europe</b>        | <b>East Asia</b>     | <b>Oceania</b>      | <b>Unknown</b>      |
|--------------------------------|-----------------------|------------------------|------------------------|---------------------|----------------------|----------------------|----------------------|---------------------|---------------------|
| Original collection (3004 acc) | <b>787</b>            | <b>1016</b>            | <b>482</b>             | <b>252</b>          | <b>166</b>           | <b>118</b>           | <b>132</b>           | <b>17</b>           | <b>34</b>           |
| CC1 (231 acc)                  | <b>55</b><br>(6.9%)   | <b>52</b><br>(5.1%)    | <b>52</b><br>(10.8%)   | <b>15</b><br>(5.9%) | <b>17</b><br>(10.2%) | <b>18</b><br>(15.2%) | <b>15</b><br>(11.4%) | <b>4</b><br>(23.5%) | <b>3</b><br>(8.8%)  |
| CC2 (300 acc)                  | <b>122</b><br>(15.5%) | <b>70</b><br>(6.9%)    | <b>55</b><br>(11.4%)   | <b>23</b><br>(9.1%) | <b>13</b><br>(7.8%)  | <b>2</b> (1%)        | <b>8</b> (6%)        | <b>1</b> (5.9%)     | <b>6</b><br>(17.4%) |
| CC3 (520 acc)                  | <b>176</b><br>(22.4%) | <b>123</b><br>(12%)    | <b>101</b><br>(20.95%) | <b>38</b><br>(15%)  | <b>28</b><br>(16.9%) | <b>19</b><br>(16.1%) | <b>21</b><br>(15.9%) | <b>5</b><br>(29.4%) | <b>9</b><br>(25.5%) |

**Supplemental Table S5:** Correlation coefficient analysis for quantitative traits in CC3 accessions.

| Traits/traits | A            | B     | C      | D     | E      | F      | G     | H     | I      | J     | K  |
|---------------|--------------|-------|--------|-------|--------|--------|-------|-------|--------|-------|----|
| <b>A</b>      | --           |       |        |       |        |        |       |       |        |       |    |
| <b>B</b>      | -0.07        | --    |        |       |        |        |       |       |        |       |    |
| <b>C</b>      | <b>0.998</b> | -0.2  | --     |       |        |        |       |       |        |       |    |
| <b>D</b>      | 0.07         | 0.44  | -0.04  | --    |        |        |       |       |        |       |    |
| <b>E</b>      | -0.227       | 0.542 | -0.27  | 0.021 | --     |        |       |       |        |       |    |
| <b>F</b>      | 0.370        | 0.086 | 0.489  | 0.244 | -0.025 | --     |       |       |        |       |    |
| <b>G</b>      | -0.095       | 0.051 | -0.008 | -0.02 | 0.084  | -0.023 | --    |       |        |       |    |
| <b>H</b>      | 0.139        | 0.037 | 0.156  | 0.153 | -0.021 | 0.08   | 0.158 | --    |        |       |    |
| <b>I</b>      | 0.555        | 0.065 | 0.68   | 0.165 | 0.005  | 0.557  | 0.069 | 0.292 | --     |       |    |
| <b>J</b>      | -0.033       | -0.16 | -0.27  | -0.09 | -0.208 | -0.144 | 0.029 | -0.13 | -0.112 | --    |    |
| <b>K</b>      | 0.426        | 0.097 | 0.614  | 0.112 | -0.03  | 0.341  | -0.03 | 0.096 | 0.391  | -0.04 | -- |

\*Values > 0.7 were significant, \*\*values between 0.3-0.7 were weakly significant, P < 0.001

A - days to 80% heading (DEH), B - 100 grain weight (HGW), C - days to first flower (DFF), D - grain length (GL), E - grain width (GW), F - panicle length (PL), G - secondary branches (SB), H- seedling height (SH), I - culm length (CL), J - culm number (CN) and K - culm diameter (CD)

**Supplemental Table S6:** Distribution of 3004 accessions of original rice collection in different clusters of maximum likelihood dendrogram (based on different varietal group).

| Cluster/varietal group                  | <i>indica</i> | <i>japonica</i> | Tropical <i>japonica</i> | Temperate <i>japonica</i> | <i>aus/boro</i> | Intermediate | Aromatic (Basmati) |
|-----------------------------------------|---------------|-----------------|--------------------------|---------------------------|-----------------|--------------|--------------------|
| <b>Cluster Ia (1771 acc)</b>            | 1641 (92.6%)  | 7               | 27                       | 30                        | 30              | 26           | 10                 |
| <b>Cluster Ib (216 acc)</b>             | 25            | 1               | 2                        | 7                         | 172 (72.6%)     | 5            | 4                  |
| <b>Cluster IIa (519 acc)</b>            | 35            | 80 (15.4%)      | 329 (63.3%)              | 31                        | 4               | 35           | 5                  |
| <b>Cluster IIb (358 acc)</b>            | 18            | 36              | 22                       | 250 (69.8%)               | 6               | 25           | 1                  |
| <b>Cluster IIc (97 acc)</b>             | 9             | 5               | 6                        | 1                         | 3               | 23 (23.7%)   | 50 (51.5%)         |
| <b>Un-clustered accessions (43 acc)</b> | 15 (34.8%)    | 3               | 2                        | 1                         | 0               | 21 (48.8%)   | 1                  |

**Supplemental Table S7:** Distribution of CC3 accessions (520) in different clusters of maximum-likelihood dendrogram of original collection of rice (3004 accessions).

| Accession distribution in cluster of maximum-likelihood dendrogram of original collection (3004 accessions) | Distribution of accession from different clusters of maximum-likelihood dendrogram captured in CC3 (520 accessions) |
|-------------------------------------------------------------------------------------------------------------|---------------------------------------------------------------------------------------------------------------------|
| Cluster Ia - 1771 accessions                                                                                | Cluster Ia - 322 accessions (18.1%)                                                                                 |
| Cluster Ib - 216 accessions                                                                                 | Cluster Ib - 42 accessions (19.4%)                                                                                  |
| Cluster IIa - 519 accessions                                                                                | Cluster IIa - 55 accessions (10.5%)                                                                                 |
| Cluster IIb - 358 accessions                                                                                | Cluster IIb - 65 accessions (18%)                                                                                   |
| Cluster IIc - 97 accessions                                                                                 | Cluster IIc - 25 accessions (25.7%)                                                                                 |
| Un-clustered group - 43 accessions                                                                          | Un-clustered group - 11 accessions (25%)                                                                            |

**Supplemental Table S8:** Distribution of different varietal group of original collection (3004 acc) in different clusters of FastSTRUCTURE analysis.

| Varietal group/Cluster              | FSTR CL1 (219 acc) | FSTR CL2 (522 acc) | FSTR CL3 (90 acc) | FSTR CL4 (973 acc) | FSTR CL5 (372 acc) | FSTR CL6 (323 acc) | FSTR CL7 (505 acc) |
|-------------------------------------|--------------------|--------------------|-------------------|--------------------|--------------------|--------------------|--------------------|
| <i>indica</i> (1743 acc)            | 28                 | 47                 | 9                 | <b>885 (91%)</b>   | 26                 | <b>297 (92%)</b>   | <b>451 (89.3%)</b> |
| <i>japonica</i> (132 acc)           | 1                  | <b>94 (18%)</b>    | 4                 | 5                  | 25                 | 0                  | 3                  |
| Temperate <i>japonica</i> (320 acc) | 4                  | 35                 | 1                 | 17                 | <b>248 (66.6%)</b> | 6                  | 9                  |
| Tropical <i>japonica</i> (388 acc)  | 1                  | <b>310 (59.3%)</b> | 2                 | 26                 | 35                 | 5                  | 9                  |
| <i>aus/boro</i> (215 acc)           | <b>179 (81.7%)</b> | 3                  | 5                 | 14                 | 5                  | 4                  | 5                  |
| Intermediate (135 acc)              | 3                  | <b>27</b>          | <b>19 (21.1%)</b> | <b>21</b>          | <b>29</b>          | 9                  | <b>27</b>          |
| Aromatic (Basmati) (71 acc)         | 3                  | 6                  | <b>50 (55.5%)</b> | 5                  | 4                  | 2                  | 1                  |

**Supplemental Table S9:** Analysis of original collection (3004 accessions) for admixtures through population structure using FastSTRUCTURE.

| <b>Pure accessions (1762 acc)</b> |     | <b>Admixtures (1242 acc)</b>    |     |
|-----------------------------------|-----|---------------------------------|-----|
| <b>Structure analysis (K=7)</b>   |     | <b>Structure analysis (K=7)</b> |     |
| FSTR CL 1                         | 189 | FSTR CL 1                       | 30  |
| FSTR CL 2                         | 330 | FSTR CL 2                       | 192 |
| FSTR CL 3                         | 64  | FSTR CL 3                       | 26  |
| FSTR CL 4                         | 591 | FSTR CL 4                       | 382 |
| FSTR CL 5                         | 256 | FSTR CL 5                       | 116 |
| FSTR CL 6                         | 148 | FSTR CL 6                       | 145 |
| FSTR CL 7                         | 154 | FSTR CL 7                       | 351 |
| <b>Varietal group (K=7)</b>       |     | <b>Varietal group (K=7)</b>     |     |
| <i>indica</i>                     | 922 | <i>indica</i>                   | 821 |
| <i>japonica</i>                   | 90  | <i>japonica</i>                 | 42  |
| Temperate <i>japonica</i>         | 234 | Temperate <i>japonica</i>       | 86  |
| Tropical <i>japonica</i>          | 236 | Tropical <i>japonica</i>        | 152 |
| <i>aus/ boro</i>                  | 186 | <i>aus/ boro</i>                | 29  |
| Aromatic (Basmati)                | 53  | Aromatic (Basmati)              | 18  |
| Intermediate                      | 41  | Intermediate                    | 94  |
| <b>Region wise (K=7)</b>          |     | <b>Region wise (K=7)</b>        |     |
| South Asia                        | 497 | South Asia                      | 290 |
| South East Asia                   | 567 | South East Asia                 | 449 |
| China                             | 275 | China                           | 207 |
| Africa                            | 166 | Africa                          | 86  |
| America                           | 87  | America                         | 79  |
| Europe                            | 53  | Europe                          | 65  |
| East Asia                         | 89  | East Asia                       | 43  |
| Oceania                           | 9   | Oceania                         | 8   |
| Unknown                           | 19  | Unknown                         | 15  |

Accessions with  $\geq 80\%$  genome similarity were considered as pure while accessions with  $< 80\%$  shared genome were termed as admixtures. Accessions highlighted in red have around equal or more number of admixtures than pure accessions.

**Supplemental Table S10:** Distribution of CC3 accessions (520 accessions) in FastSTRUCTURE derived clusters of original collection of rice (3004 accessions).

| FastStructure Clusters | Accessions from original collection | Accessions of original collection with Q value > 80% (Pure) | Accessions of original collection with Q value < 80% (Admixtures) | Accessions picked from original collection in CC3 mini-core | Accessions of CC3 with Q value > 80% (Pure) | Accessions of CC3 with Q value < 80% (Admixture) |
|------------------------|-------------------------------------|-------------------------------------------------------------|-------------------------------------------------------------------|-------------------------------------------------------------|---------------------------------------------|--------------------------------------------------|
| FSTR CL 1              | 219                                 | 189                                                         | 30                                                                | 50                                                          | 40                                          | 10                                               |
| FSTR CL 2              | 522                                 | 330                                                         | 192                                                               | 42                                                          | 23                                          | 19                                               |
| FSTR CL 3              | 90                                  | 64                                                          | 26                                                                | 24                                                          | 13                                          | 11                                               |
| FSTR CL 4              | 973                                 | 591                                                         | 382                                                               | 185                                                         | 109                                         | 76                                               |
| FSTR CL 5              | 372                                 | 256                                                         | 116                                                               | 74                                                          | 37                                          | 37                                               |
| FSTR CL 6              | 323                                 | 148                                                         | 145                                                               | 61                                                          | 28                                          | 33                                               |
| FSTR CL 7              | 505                                 | 154                                                         | 351                                                               | 84                                                          | 25                                          | 59                                               |

Accessions with  $\geq 80\%$  genome similarity were considered as pure while accessions with  $< 80\%$  shared genome were termed as admixtures. Accessions highlighted in red have around equal or more number of admixtures than pure accessions.

**Supplemental Table S11:** Distribution of CC3 accessions (520 acc) based on varietal groups in different clusters of FastSTRUCTURE analysis (K=7). Numbers in parentheses represents accessions.

| Cluster/<br>Varietal group | <i>indica</i><br>(295) | Tropical<br><i>japonica</i><br>(27) | Temperate<br><i>japonica</i><br>(44) | <i>Japonica</i><br>(23) | <i>aus/boro</i><br>(55) | Intermediate<br>(61) | Aromatic<br>(Basmati)<br>(15) |
|----------------------------|------------------------|-------------------------------------|--------------------------------------|-------------------------|-------------------------|----------------------|-------------------------------|
| CC CL1<br>(73 acc)         | 57                     | 0                                   | 1                                    | 1                       | 1                       | 12                   | 1                             |
| CC CL2<br>(23 acc)         | 1                      | 0                                   | 0                                    | 0                       | 5                       | 8                    | 9                             |
| CC CL3<br>(49 acc)         | 6                      | 0                                   | 1                                    | 1                       | 41                      | 0                    | 0                             |
| CC CL4<br>(70 acc)         | 58                     | 1                                   | 0                                    | 0                       | 3                       | 8                    | 0                             |
| CC CL5<br>(43 acc)         | 3                      | 17                                  | 4                                    | 10                      | 0                       | 8                    | 1                             |
| CC CL6<br>(191 acc)        | 165                    | 5                                   | 2                                    | 2                       | 4                       | 11                   | 2                             |
| CC CL7<br>(71 acc)         | 5                      | 4                                   | 36                                   | 9                       | 1                       | 14                   | 2                             |

**Supplemental Table S12:** Analysis of CC3 (520 accessions) for admixtures through population structure using FastSTRUCTURE.

| <b>Pure accessions (275 accessions)</b> |     | <b>Admixtures (245 accessions)</b> |     |
|-----------------------------------------|-----|------------------------------------|-----|
| <b>Structure analysis (K=7)</b>         |     | <b>Structure analysis (K=7)</b>    |     |
| CC CL1                                  | 25  | CC CL1                             | 48  |
| CC CL2                                  | 13  | CC CL2                             | 10  |
| CC CL3                                  | 40  | CC CL3                             | 9   |
| CC CL4                                  | 28  | CC CL4                             | 42  |
| CC CL5                                  | 23  | CC CL5                             | 20  |
| CC CL6                                  | 109 | CC CL6                             | 82  |
| CC CL7                                  | 37  | CC CL7                             | 34  |
| <b>Varietal group (K=7)</b>             |     | <b>Varietal group (K=7)</b>        |     |
| <i>indica</i>                           | 151 | <i>indica</i>                      | 144 |
| <i>japonica</i>                         | 11  | <i>japonica</i>                    | 12  |
| Temperate <i>japonica</i>               | 29  | Temperate <i>japonica</i>          | 15  |
| Tropical <i>japonica</i>                | 14  | Tropical <i>japonica</i>           | 13  |
| <i>aus/ boro</i>                        | 45  | <i>aus/ boro</i>                   | 10  |
| Aromatic (Basmati)                      | 11  | Aromatic (Basmati)                 | 4   |
| Intermediate                            | 14  | Intermediate                       | 47  |
| <b>Region wise (K=7)</b>                |     | <b>Region wise (K=7)</b>           |     |
| South Asia                              | 106 | South Asia                         | 70  |
| South East Asia                         | 60  | South East Asia                    | 63  |
| China                                   | 47  | China                              | 54  |
| Africa                                  | 23  | Africa                             | 15  |
| America                                 | 15  | America                            | 23  |
| Europe                                  | 6   | Europe                             | 13  |
| East Asia                               | 11  | East Asia                          | 10  |
| Oceania                                 | 2   | Oceania                            | 3   |
| Unknown                                 | 5   | Unknown                            | 4   |

Accessions with  $\geq 80\%$  genome similarity were considered as pure while accessions with  $< 80\%$  shared genome were termed as admixtures. Accessions highlighted in red have equal or more number of admixtures than pure accessions



**Supplemental Table S14:** Association analysis of 3004 accessions of original collection.

| Trait                 | Chr | Position | Major allele | Minor allele | Minor allele frequency | Nipp. allele | CC3 allele | P-value FDR adjusted     | R <sup>2</sup> value (%) | Known loci  |
|-----------------------|-----|----------|--------------|--------------|------------------------|--------------|------------|--------------------------|--------------------------|-------------|
| Grain length          | 3   | 16733441 | G            | T            | 0.36                   | G            | T          | 3.4 X 10 <sup>-43</sup>  | 43.5                     | <i>GS3</i>  |
| Grain length          | 5   | 5361894  | G            | A            | 0.36                   | G            | A          | 3.4 X 10 <sup>-9</sup>   | 38.8                     | <i>qSW5</i> |
| Grain width           | 5   | 5371686  | C            | T            | 0.49                   | C            | T          | 9.3 X 10 <sup>-34</sup>  | 51.4                     | <i>qSW5</i> |
| Grain width           | 5   | 28019687 | T            | C            | 0.10                   | T            | C          | 8.4 X 10 <sup>-6</sup>   | 48                       |             |
| Hundred Grain weight  | 3   | 16733441 | G            | T            | 0.36                   | G            | T          | 7.9 X 10 <sup>-5</sup>   | 35.2                     | <i>GS3</i>  |
| Hundred Grain weight  | 5   | 5375201  | T            | C            | 0.48                   | T            | C          | 7.9 X 10 <sup>-5</sup>   | 35.2                     | <i>qSW5</i> |
| Endosperm type        | 6   | 1731808  | G            | C            | 0.20                   | G            | C          | 1.03 X 10 <sup>-29</sup> | 20.2                     | <i>waxy</i> |
| Endosperm type        | 6   | 6830286  | G            | A            | 0.21                   | G            | A          | 3.4 X 10 <sup>-8</sup>   | 15.6                     |             |
| Seed coat color       | 7   | 6133394  | G            | A            | 0.26                   | G            | A          | 6.6 X 10 <sup>-11</sup>  | 7.2                      | <i>Rc</i>   |
| Seed coat color       | 7   | 6417000  | G            | T            | 0.32                   | G            | T          | 1.7 X 10 <sup>-10</sup>  | 7.1                      |             |
| Seed coat color       | 7   | 6656052  | T            | C            | 0.43                   | T            | C          | 1.8 X 10 <sup>-8</sup>   | 6.8                      |             |
| Seed coat color       | 2   | 32431463 | A            | G            | 0.27                   | A            | G          | 3.7 X 10 <sup>-5</sup>   | 5.6                      |             |
| Panicle threshability | 2   | 21739453 | C            | T            | 0.23                   | C            | T          | 6.8 X 10 <sup>-3</sup>   | 16.4                     |             |

Nipp; Nipponbare, Chr; Chromosome
