# Supplementary material for: Designing of a mini-core that effectively represents 3004 diverse accessions of rice
Source: bioRxiv or medRxiv preprint supplement (doi:10.1101/762070), 2019-09-09
Supplement: Supplementary file [file media-2.pdf]

**Supplemental Table S13: Details of significantly associated SNPs (FDR adjusted p-value < 0.05) with different agronomic traits across the CC3 panel (520) rice accessions**

| Endospem_type             |      |          |          |         |      |                         |                       |  |
|---------------------------|------|----------|----------|---------|------|-------------------------|-----------------------|--|
| SNP                       | Chr. | Position | P.value  | maf     | nobs | R <sup>2</sup> with SNP | FDR_Adjusted_P-values |  |
| SNP_A.K_999520_6_6294468  | 6    | 6294468  | 6.05E-15 | 0.0786  | 299  | 0.291132498             | 1.26E-08              |  |
| SNP_A.K_999073_6_6254780  | 6    | 6254780  | 2.35E-14 | 0.08528 | 299  | 0.28089951              | 2.12E-08              |  |
| SNP_A.K_999754_6_6312567  | 6    | 6312567  | 3.06E-14 | 0.08863 | 299  | 0.278936803             | 2.12E-08              |  |
| SNP_A.K_999759_6_6312665  | 6    | 6312665  | 5.27E-14 | 0.08863 | 299  | 0.274878583             | 2.74E-08              |  |
| SNP_A.K_998917_6_6234398  | 6    | 6234398  | 6.99E-14 | 0.08528 | 299  | 0.272778142             | 2.91E-08              |  |
| SNP_A.K_1000416_6_6382958 | 6    | 6382958  | 1.17E-13 | 0.0903  | 299  | 0.268937006             | 3.11E-08              |  |
| SNP_A.K_993625_6_5780299  | 6    | 5780299  | 1.31E-13 | 0.0903  | 299  | 0.268123575             | 3.11E-08              |  |
| SNP_A.K_999753_6_6312564  | 6    | 6312564  | 1.36E-13 | 0.08863 | 299  | 0.267834759             | 3.11E-08              |  |
| SNP_A.K_1000516_6_6390607 | 6    | 6390607  | 1.43E-13 | 0.08696 | 299  | 0.267481017             | 3.11E-08              |  |
| SNP_A.K_998815_6_6226255  | 6    | 6226255  | 1.49E-13 | 0.08863 | 299  | 0.267140217             | 3.11E-08              |  |
| SNP_A.K_993650_6_5781607  | 6    | 5781607  | 2.35E-13 | 0.09197 | 299  | 0.263802539             | 4.32E-08              |  |
| SNP_A.K_994404_6_5856411  | 6    | 5856411  | 2.49E-13 | 0.08027 | 299  | 0.26337929              | 4.32E-08              |  |
| SNP_A.K_994355_6_5850932  | 6    | 5850932  | 2.71E-13 | 0.09532 | 299  | 0.262758569             | 4.33E-08              |  |
| SNP_A.K_995823_6_5951741  | 6    | 5951741  | 3.71E-13 | 0.0903  | 299  | 0.260434516             | 5.52E-08              |  |
| SNP_A.K_999049_6_6249991  | 6    | 6249991  | 4.52E-13 | 0.09197 | 299  | 0.258984871             | 6.12E-08              |  |
| SNP_A.K_995382_6_5931081  | 6    | 5931081  | 4.70E-13 | 0.12542 | 299  | 0.258700998             | 6.12E-08              |  |
| SNP_A.K_1000201_6_6354533 | 6    | 6354533  | 5.50E-13 | 0.08863 | 299  | 0.257551968             | 6.43E-08              |  |
| SNP_A.K_999736_6_6311774  | 6    | 6311774  | 5.83E-13 | 0.08361 | 299  | 0.257126879             | 6.43E-08              |  |
| SNP_A.K_999643_6_6302290  | 6    | 6302290  | 5.92E-13 | 0.08696 | 299  | 0.257008495             | 6.43E-08              |  |
| SNP_A.K_999737_6_6311779  | 6    | 6311779  | 7.16E-13 | 0.0903  | 299  | 0.255622588             | 6.43E-08              |  |
| SNP_A.K_993674_6_5783531  | 6    | 5783531  | 7.17E-13 | 0.08361 | 299  | 0.255609383             | 6.43E-08              |  |
| SNP_A.K_999522_6_6294475  | 6    | 6294475  | 7.50E-13 | 0.07525 | 299  | 0.255277734             | 6.43E-08              |  |
| SNP_A.K_995627_6_5943868  | 6    | 5943868  | 7.67E-13 | 0.12375 | 299  | 0.25511368              | 6.43E-08              |  |
| SNP_A.K_978696_6_1765761  | 6    | 1765761  | 7.79E-13 | 0.13043 | 299  | 0.255007736             | 6.43E-08              |  |
| SNP_A.K_994328_6_5845302  | 6    | 5845302  | 8.09E-13 | 0.09365 | 299  | 0.254729601             | 6.43E-08              |  |
| SNP_A.K_1000581_6_6397558 | 6    | 6397558  | 8.20E-13 | 0.08361 | 299  | 0.254631025             | 6.43E-08              |  |
| SNP_A.K_995269_6_5923617  | 6    | 5923617  | 8.34E-13 | 0.0903  | 299  | 0.254507649             | 6.43E-08              |  |
| SNP_A.K_1000563_6_6396376 | 6    | 6396376  | 1.03E-12 | 0.08696 | 299  | 0.252947395             | 7.68E-08              |  |
| SNP_A.K_999844_6_6327999  | 6    | 6327999  | 1.09E-12 | 0.09197 | 299  | 0.252538245             | 7.84E-08              |  |
| SNP_A.K_999914_6_6332248  | 6    | 6332248  | 1.20E-12 | 0.0903  | 299  | 0.251855476             | 8.18E-08              |  |
| SNP_A.K_999899_6_6331984  | 6    | 6331984  | 1.22E-12 | 0.13545 | 299  | 0.251738046             | 8.18E-08              |  |
| SNP_A.K_993639_6_5780757  | 6    | 5780757  | 1.40E-12 | 0.09532 | 299  | 0.25071359              | 9.13E-08              |  |
| SNP_A.K_998850_6_6228661  | 6    | 6228661  | 1.60E-12 | 0.08528 | 299  | 0.249751738             | 1.01E-07              |  |
| SNP_A.K_994487_6_5868508  | 6    | 5868508  | 1.79E-12 | 0.08361 | 299  | 0.248952856             | 1.07E-07              |  |
| SNP_A.K_994483_6_5868337  | 6    | 5868337  | 1.83E-12 | 0.08361 | 299  | 0.248795707             | 1.07E-07              |  |
| SNP_A.K_998813_6_6225970  | 6    | 6225970  | 1.86E-12 | 0.09365 | 299  | 0.248656659             | 1.07E-07              |  |
| SNP_A.K_994320_6_5843882  | 6    | 5843882  | 1.90E-12 | 0.08696 | 299  | 0.248524277             | 1.07E-07              |  |
| SNP_A.K_998795_6_6223701  | 6    | 6223701  | 2.02E-12 | 0.08696 | 299  | 0.248059107             | 1.11E-07              |  |
| SNP_A.K_999625_6_6301269  | 6    | 6301269  | 2.12E-12 | 0.08863 | 299  | 0.247711345             | 1.13E-07              |  |
| SNP_A.K_993671_6_5783170  | 6    | 5783170  | 2.29E-12 | 0.09365 | 299  | 0.247145893             | 1.19E-07              |  |
| SNP_A.K_995537_6_5940623  | 6    | 5940623  | 2.36E-12 | 0.08696 | 299  | 0.246924467             | 1.19E-07              |  |
| SNP_A.K_999271_6_6275695  | 6    | 6275695  | 2.44E-12 | 0.12709 | 299  | 0.246695873             | 1.19E-07              |  |
| SNP_A.K_999638_6_6301875  | 6    | 6301875  | 2.45E-12 | 0.09197 | 299  | 0.246652771             | 1.19E-07              |  |
| SNP_A.K_999167_6_6264479  | 6    | 6264479  | 2.65E-12 | 0.08528 | 299  | 0.246099147             | 1.25E-07              |  |
| SNP_A.K_996759_6_6024319  | 6    | 6024319  | 2.89E-12 | 0.09699 | 299  | 0.245475946             | 1.34E-07              |  |

|                           |   |          |          |         |     |             |          |
|---------------------------|---|----------|----------|---------|-----|-------------|----------|
| SNP_A.K_995533_6_5940415  | 6 | 5940415  | 3.27E-12 | 0.12542 | 299 | 0.24458706  | 1.48E-07 |
| SNP_A.K_999222_6_6268799  | 6 | 6268799  | 3.45E-12 | 0.08696 | 299 | 0.244196963 | 1.53E-07 |
| SNP_A.K_999333_6_6282344  | 6 | 6282344  | 3.97E-12 | 0.12375 | 299 | 0.243174944 | 1.72E-07 |
| SNP_A.K_999422_6_6287576  | 6 | 6287576  | 4.07E-12 | 0.08863 | 299 | 0.242989809 | 1.73E-07 |
| SNP_A.K_993654_6_5781741  | 6 | 5781741  | 4.28E-12 | 0.08528 | 299 | 0.242628753 | 1.76E-07 |
| SNP_A.K_328503_2_10277497 | 2 | 10277497 | 4.31E-12 | 0.02676 | 299 | 0.242580737 | 1.76E-07 |
| SNP_A.K_999338_6_6282725  | 6 | 6282725  | 4.50E-12 | 0.09532 | 299 | 0.242268681 | 1.80E-07 |
| SNP_A.K_994564_6_5873622  | 6 | 5873622  | 4.87E-12 | 0.08696 | 299 | 0.241700627 | 1.91E-07 |
| SNP_A.K_1000565_6_6396414 | 6 | 6396414  | 5.04E-12 | 0.08696 | 299 | 0.241459782 | 1.94E-07 |
| SNP_A.K_996298_6_5981812  | 6 | 5981812  | 5.38E-12 | 0.09197 | 299 | 0.240980002 | 2.04E-07 |
| SNP_A.K_995373_6_5929348  | 6 | 5929348  | 5.53E-12 | 0.0903  | 299 | 0.240788867 | 2.05E-07 |
| SNP_A.K_994236_6_5832007  | 6 | 5832007  | 5.67E-12 | 0.08863 | 299 | 0.240610008 | 2.07E-07 |
| SNP_A.K_994445_6_5860919  | 6 | 5860919  | 6.03E-12 | 0.08696 | 299 | 0.240168265 | 2.08E-07 |
| SNP_A.K_998775_6_6221000  | 6 | 6221000  | 6.07E-12 | 0.0903  | 299 | 0.240112443 | 2.08E-07 |
| SNP_A.K_998730_6_6218360  | 6 | 6218360  | 6.08E-12 | 0.09699 | 299 | 0.240100918 | 2.08E-07 |
| SNP_A.K_996570_6_6010335  | 6 | 6010335  | 6.09E-12 | 0.09532 | 299 | 0.240091998 | 2.08E-07 |
| SNP_A.K_995555_6_5941693  | 6 | 5941693  | 6.26E-12 | 0.11706 | 299 | 0.239891556 | 2.08E-07 |
| SNP_A.K_994403_6_5856394  | 6 | 5856394  | 6.29E-12 | 0.07525 | 299 | 0.239864161 | 2.08E-07 |
| SNP_A.K_995905_6_5954735  | 6 | 5954735  | 6.41E-12 | 0.08863 | 299 | 0.239726703 | 2.08E-07 |
| SNP_A.K_1000556_6_6395708 | 6 | 6395708  | 6.71E-12 | 0.08863 | 299 | 0.239396072 | 2.15E-07 |
| SNP_A.K_994224_6_5827383  | 6 | 5827383  | 7.12E-12 | 0.12375 | 299 | 0.238966799 | 2.25E-07 |
| SNP_A.K_991499_6_5493250  | 6 | 5493250  | 7.71E-12 | 0.07023 | 299 | 0.238395362 | 2.40E-07 |
| SNP_A.K_993655_6_5781748  | 6 | 5781748  | 8.77E-12 | 0.08863 | 299 | 0.237470308 | 2.62E-07 |
| SNP_A.K_996001_6_5957294  | 6 | 5957294  | 8.79E-12 | 0.09197 | 299 | 0.237452137 | 2.62E-07 |
| SNP_A.K_994316_6_5843510  | 6 | 5843510  | 9.07E-12 | 0.0903  | 299 | 0.237231643 | 2.62E-07 |
| SNP_A.K_999138_6_6263245  | 6 | 6263245  | 9.14E-12 | 0.08863 | 299 | 0.237175337 | 2.62E-07 |
| SNP_A.K_995822_6_5951726  | 6 | 5951726  | 9.15E-12 | 0.0903  | 299 | 0.237168794 | 2.62E-07 |
| SNP_A.K_997873_6_6155185  | 6 | 6155185  | 9.19E-12 | 0.08696 | 299 | 0.237131859 | 2.62E-07 |
| SNP_A.K_998814_6_6226124  | 6 | 6226124  | 9.72E-12 | 0.0903  | 299 | 0.236729792 | 2.74E-07 |
| SNP_A.K_998777_6_6221103  | 6 | 6221103  | 1.01E-11 | 0.14381 | 299 | 0.236434101 | 2.81E-07 |
| SNP_A.K_999213_6_6267310  | 6 | 6267310  | 1.14E-11 | 0.0903  | 299 | 0.235578142 | 3.13E-07 |
| SNP_A.K_996673_6_6016337  | 6 | 6016337  | 1.21E-11 | 0.09699 | 299 | 0.235135119 | 3.28E-07 |
| SNP_A.K_998846_6_6228322  | 6 | 6228322  | 1.28E-11 | 0.08863 | 299 | 0.234781757 | 3.41E-07 |
| SNP_A.K_993974_6_5804805  | 6 | 5804805  | 1.44E-11 | 0.1204  | 299 | 0.23392584  | 3.79E-07 |
| SNP_A.K_1000919_6_6423748 | 6 | 6423748  | 1.47E-11 | 0.08194 | 299 | 0.23376088  | 3.79E-07 |
| SNP_A.K_999099_6_6257056  | 6 | 6257056  | 1.48E-11 | 0.08863 | 299 | 0.233744064 | 3.79E-07 |
| SNP_A.K_999370_6_6284657  | 6 | 6284657  | 1.50E-11 | 0.08863 | 299 | 0.233637342 | 3.80E-07 |
| SNP_A.K_994715_6_5881999  | 6 | 5881999  | 1.53E-11 | 0.13378 | 299 | 0.23346448  | 3.84E-07 |
| SNP_A.K_999106_6_6257205  | 6 | 6257205  | 1.55E-11 | 0.09866 | 299 | 0.233393737 | 3.84E-07 |
| SNP_A.K_995348_6_5927290  | 6 | 5927290  | 1.57E-11 | 0.08696 | 299 | 0.233293012 | 3.85E-07 |
| SNP_A.K_1000444_6_6385368 | 6 | 6385368  | 1.72E-11 | 0.0903  | 299 | 0.232657628 | 4.16E-07 |
| SNP_A.K_1000505_6_6389577 | 6 | 6389577  | 1.74E-11 | 0.08361 | 299 | 0.232551898 | 4.17E-07 |
| SNP_A.K_999059_6_6250399  | 6 | 6250399  | 1.86E-11 | 0.09699 | 299 | 0.232103415 | 4.31E-07 |
| SNP_A.K_994387_6_5854645  | 6 | 5854645  | 1.86E-11 | 0.12542 | 299 | 0.232080526 | 4.31E-07 |
| SNP_A.K_1364837_8_6048049 | 8 | 6048049  | 1.87E-11 | 0.03512 | 299 | 0.232070063 | 4.31E-07 |
| SNP_A.K_999301_6_6277647  | 6 | 6277647  | 1.94E-11 | 0.08863 | 299 | 0.231776913 | 4.40E-07 |
| SNP_A.K_996745_6_6021469  | 6 | 6021469  | 1.94E-11 | 0.09365 | 299 | 0.23177393  | 4.40E-07 |
| SNP_A.K_995650_6_5946309  | 6 | 5946309  | 2.02E-11 | 0.12375 | 299 | 0.231497891 | 4.48E-07 |
| SNP_A.K_999622_6_6301063  | 6 | 6301063  | 2.03E-11 | 0.0903  | 299 | 0.231479213 | 4.48E-07 |
| SNP_A.K_993680_6_5784371  | 6 | 5784371  | 2.04E-11 | 0.09365 | 299 | 0.231415368 | 4.48E-07 |

|                           |   |         |          |         |     |             |          |
|---------------------------|---|---------|----------|---------|-----|-------------|----------|
| SNP_A.K_998940_6_6236471  | 6 | 6236471 | 2.17E-11 | 0.08194 | 299 | 0.231007352 | 4.69E-07 |
| SNP_A.K_997927_6_6159890  | 6 | 6159890 | 2.37E-11 | 0.09532 | 299 | 0.230365951 | 5.08E-07 |
| SNP_A.K_994378_6_5854002  | 6 | 5854002 | 2.40E-11 | 0.12375 | 299 | 0.23026806  | 5.10E-07 |
| SNP_A.K_999365_6_6284017  | 6 | 6284017 | 2.49E-11 | 0.09197 | 299 | 0.229998023 | 5.25E-07 |
| SNP_A.K_994475_6_5865633  | 6 | 5865633 | 2.61E-11 | 0.08361 | 299 | 0.229684479 | 5.43E-07 |
| SNP_A.K_995716_6_5948813  | 6 | 5948813 | 2.64E-11 | 0.09699 | 299 | 0.229605785 | 5.43E-07 |
| SNP_A.K_994749_6_5886035  | 6 | 5886035 | 2.66E-11 | 0.0903  | 299 | 0.229532749 | 5.43E-07 |
| SNP_A.K_994765_6_5888082  | 6 | 5888082 | 2.74E-11 | 0.10535 | 299 | 0.229321875 | 5.54E-07 |
| SNP_A.K_996782_6_6025389  | 6 | 6025389 | 2.80E-11 | 0.11037 | 299 | 0.229168538 | 5.61E-07 |
| SNP_A.K_995699_6_5948118  | 6 | 5948118 | 3.05E-11 | 0.08528 | 299 | 0.228578471 | 6.04E-07 |
| SNP_A.K_994401_6_5856335  | 6 | 5856335 | 3.12E-11 | 0.11037 | 299 | 0.228396763 | 6.08E-07 |
| SNP_A.K_999831_6_6327455  | 6 | 6327455 | 3.13E-11 | 0.08361 | 299 | 0.22837566  | 6.08E-07 |
| SNP_A.K_999103_6_6257135  | 6 | 6257135 | 3.16E-11 | 0.09866 | 299 | 0.22832674  | 6.08E-07 |
| SNP_A.K_993851_6_5796742  | 6 | 5796742 | 3.32E-11 | 0.12876 | 299 | 0.227962433 | 6.34E-07 |
| SNP_A.K_999348_6_6283162  | 6 | 6283162 | 3.35E-11 | 0.08361 | 299 | 0.227905489 | 6.34E-07 |
| SNP_A.K_995268_6_5923572  | 6 | 5923572 | 3.42E-11 | 0.09197 | 299 | 0.227752264 | 6.42E-07 |
| SNP_A.K_999191_6_6265220  | 6 | 6265220 | 3.53E-11 | 0.09365 | 299 | 0.227536371 | 6.54E-07 |
| SNP_A.K_996328_6_5986872  | 6 | 5986872 | 3.55E-11 | 0.09197 | 299 | 0.227491109 | 6.54E-07 |
| SNP_A.K_999730_6_6311365  | 6 | 6311365 | 3.73E-11 | 0.08528 | 299 | 0.227140086 | 6.73E-07 |
| SNP_A.K_998770_6_6220481  | 6 | 6220481 | 3.78E-11 | 0.08863 | 299 | 0.227047726 | 6.73E-07 |
| SNP_A.K_999683_6_6307536  | 6 | 6307536 | 3.78E-11 | 0.15385 | 299 | 0.227037986 | 6.73E-07 |
| SNP_A.K_996157_6_5970476  | 6 | 5970476 | 3.78E-11 | 0.09365 | 299 | 0.227036985 | 6.73E-07 |
| SNP_A.K_998794_6_6223638  | 6 | 6223638 | 3.93E-11 | 0.08863 | 299 | 0.226773695 | 6.81E-07 |
| SNP_A.K_999636_6_6301739  | 6 | 6301739 | 3.93E-11 | 0.0903  | 299 | 0.226767303 | 6.81E-07 |
| SNP_A.K_999110_6_6257284  | 6 | 6257284 | 3.97E-11 | 0.08696 | 299 | 0.226686742 | 6.81E-07 |
| SNP_A.K_999352_6_6283316  | 6 | 6283316 | 4.00E-11 | 0.09365 | 299 | 0.226647315 | 6.81E-07 |
| SNP_A.K_997171_6_6054645  | 6 | 6054645 | 4.01E-11 | 0.09197 | 299 | 0.226618588 | 6.81E-07 |
| SNP_A.K_998894_6_6231763  | 6 | 6231763 | 4.03E-11 | 0.0903  | 299 | 0.226595876 | 6.81E-07 |
| SNP_A.K_997686_6_6142451  | 6 | 6142451 | 4.12E-11 | 0.09866 | 299 | 0.226424241 | 6.90E-07 |
| SNP_A.K_994138_6_5817719  | 6 | 5817719 | 4.16E-11 | 0.11371 | 299 | 0.22636789  | 6.90E-07 |
| SNP_A.K_995379_6_5930135  | 6 | 5930135 | 4.18E-11 | 0.08528 | 299 | 0.226330728 | 6.90E-07 |
| SNP_A.K_998953_6_6240098  | 6 | 6240098 | 4.37E-11 | 0.08361 | 299 | 0.226022593 | 7.06E-07 |
| SNP_A.K_999349_6_6283176  | 6 | 6283176 | 4.37E-11 | 0.08361 | 299 | 0.226022593 | 7.06E-07 |
| SNP_A.K_1000295_6_6369047 | 6 | 6369047 | 4.38E-11 | 0.10368 | 299 | 0.226000895 | 7.06E-07 |
| SNP_A.K_994339_6_5847479  | 6 | 5847479 | 4.41E-11 | 0.08863 | 299 | 0.225948014 | 7.06E-07 |
| SNP_A.K_999672_6_6306686  | 6 | 6306686 | 4.53E-11 | 0.09699 | 299 | 0.225763641 | 7.13E-07 |
| SNP_A.K_995341_6_5926818  | 6 | 5926818 | 4.57E-11 | 0.09365 | 299 | 0.225703858 | 7.13E-07 |
| SNP_A.K_999241_6_6270064  | 6 | 6270064 | 4.57E-11 | 0.11873 | 299 | 0.225689748 | 7.13E-07 |
| SNP_A.K_999594_6_6299163  | 6 | 6299163 | 4.59E-11 | 0.08361 | 299 | 0.225664908 | 7.13E-07 |
| SNP_A.K_996367_6_5994895  | 6 | 5994895 | 4.72E-11 | 0.09365 | 299 | 0.225475195 | 7.27E-07 |
| SNP_A.K_996141_6_5964541  | 6 | 5964541 | 4.92E-11 | 0.09532 | 299 | 0.2251688   | 7.53E-07 |
| SNP_A.K_993961_6_5802562  | 6 | 5802562 | 5.02E-11 | 0.13211 | 299 | 0.225028614 | 7.53E-07 |
| SNP_A.K_993172_6_5712012  | 6 | 5712012 | 5.04E-11 | 0.11204 | 299 | 0.225006284 | 7.53E-07 |
| SNP_A.K_1002990_6_6640344 | 6 | 6640344 | 5.06E-11 | 0.08194 | 299 | 0.224974207 | 7.53E-07 |
| SNP_A.K_999276_6_6276073  | 6 | 6276073 | 5.10E-11 | 0.11538 | 299 | 0.224919978 | 7.53E-07 |
| SNP_A.K_999417_6_6287437  | 6 | 6287437 | 5.10E-11 | 0.08696 | 299 | 0.224919155 | 7.53E-07 |
| SNP_A.K_1364828_8_6046714 | 8 | 6046714 | 5.22E-11 | 0.04013 | 299 | 0.224755728 | 7.65E-07 |
| SNP_A.K_999468_6_6291568  | 6 | 6291568 | 5.26E-11 | 0.08528 | 299 | 0.22470558  | 7.65E-07 |
| SNP_A.K_998792_6_6222593  | 6 | 6222593 | 5.50E-11 | 0.10535 | 299 | 0.224386766 | 7.95E-07 |
| SNP_A.K_999407_6_6286564  | 6 | 6286564 | 5.55E-11 | 0.10201 | 299 | 0.224323477 | 7.96E-07 |

|                           |   |          |          |         |     |             |          |
|---------------------------|---|----------|----------|---------|-----|-------------|----------|
| SNP_A.K_996779_6_6025241  | 6 | 6025241  | 5.72E-11 | 0.10201 | 299 | 0.22410968  | 8.15E-07 |
| SNP_A.K_998957_6_6240837  | 6 | 6240837  | 5.76E-11 | 0.08027 | 299 | 0.224064111 | 8.15E-07 |
| SNP_A.K_994235_6_5831947  | 6 | 5831947  | 5.89E-11 | 0.08361 | 299 | 0.223900003 | 8.27E-07 |
| SNP_A.K_993991_6_5806864  | 6 | 5806864  | 5.92E-11 | 0.08863 | 299 | 0.223866352 | 8.27E-07 |
| SNP_A.K_995380_6_5930170  | 6 | 5930170  | 6.06E-11 | 0.08696 | 299 | 0.223698089 | 8.41E-07 |
| SNP_A.K_996285_6_5981490  | 6 | 5981490  | 6.20E-11 | 0.09532 | 299 | 0.223539852 | 8.54E-07 |
| SNP_A.K_995721_6_5948853  | 6 | 5948853  | 6.40E-11 | 0.09365 | 299 | 0.223318382 | 8.76E-07 |
| SNP_A.K_998913_6_6234067  | 6 | 6234067  | 6.66E-11 | 0.08194 | 299 | 0.22302949  | 9.06E-07 |
| SNP_A.K_1000338_6_6376429 | 6 | 6376429  | 7.09E-11 | 0.08528 | 299 | 0.222594845 | 9.58E-07 |
| SNP_A.K_325679_2_9921824  | 2 | 9921824  | 7.28E-11 | 0.0301  | 299 | 0.222405272 | 9.77E-07 |
| SNP_A.K_994998_6_5912028  | 6 | 5912028  | 7.42E-11 | 0.09365 | 299 | 0.222264471 | 9.91E-07 |
| SNP_A.K_1000523_6_6391183 | 6 | 6391183  | 7.86E-11 | 0.09866 | 299 | 0.221857799 | 1.04E-06 |
| SNP_A.K_328877_2_10321602 | 2 | 10321602 | 8.43E-11 | 0.01505 | 299 | 0.221371511 | 1.11E-06 |
| SNP_A.K_995384_6_5931170  | 6 | 5931170  | 8.68E-11 | 0.09866 | 299 | 0.221158898 | 1.13E-06 |
| SNP_A.K_1000506_6_6389604 | 6 | 6389604  | 8.71E-11 | 0.08696 | 299 | 0.221136996 | 1.13E-06 |
| SNP_A.K_998773_6_6220832  | 6 | 6220832  | 8.86E-11 | 0.09197 | 299 | 0.221013146 | 1.15E-06 |
| SNP_A.K_992488_6_5652615  | 6 | 5652615  | 8.94E-11 | 0.10535 | 299 | 0.22095153  | 1.15E-06 |
| SNP_A.K_1000225_6_6357159 | 6 | 6357159  | 9.64E-11 | 0.1087  | 299 | 0.220420623 | 1.22E-06 |
| SNP_A.K_325574_2_9907613  | 2 | 9907613  | 9.66E-11 | 0.02174 | 299 | 0.22040899  | 1.22E-06 |
| SNP_A.K_325662_2_9921207  | 2 | 9921207  | 9.66E-11 | 0.02174 | 299 | 0.22040899  | 1.22E-06 |
| SNP_A.K_996301_6_5981935  | 6 | 5981935  | 9.77E-11 | 0.09532 | 299 | 0.220325849 | 1.23E-06 |
| SNP_A.K_998232_6_6185754  | 6 | 6185754  | 9.93E-11 | 0.10033 | 299 | 0.22021643  | 1.24E-06 |
| SNP_A.K_998367_6_6191313  | 6 | 6191313  | 1.04E-10 | 0.09532 | 299 | 0.219886147 | 1.29E-06 |
| SNP_A.K_999668_6_6304733  | 6 | 6304733  | 1.05E-10 | 0.09866 | 299 | 0.219817076 | 1.29E-06 |
| SNP_A.K_999379_6_6285385  | 6 | 6285385  | 1.05E-10 | 0.08863 | 299 | 0.219800502 | 1.29E-06 |
| SNP_A.K_997784_6_6146505  | 6 | 6146505  | 1.06E-10 | 0.10033 | 299 | 0.219751378 | 1.29E-06 |
| SNP_A.K_1000246_6_6358278 | 6 | 6358278  | 1.07E-10 | 0.09699 | 299 | 0.219672564 | 1.30E-06 |
| SNP_A.K_999823_6_6327391  | 6 | 6327391  | 1.15E-10 | 0.08528 | 299 | 0.219209473 | 1.37E-06 |
| SNP_A.K_999457_6_6291033  | 6 | 6291033  | 1.15E-10 | 0.0903  | 299 | 0.219201928 | 1.37E-06 |
| SNP_A.K_997161_6_6051871  | 6 | 6051871  | 1.15E-10 | 0.10535 | 299 | 0.219174735 | 1.37E-06 |
| SNP_A.K_999735_6_6311754  | 6 | 6311754  | 1.16E-10 | 0.08863 | 299 | 0.219131293 | 1.37E-06 |
| SNP_A.K_995977_6_5956567  | 6 | 5956567  | 1.18E-10 | 0.08863 | 299 | 0.218991585 | 1.39E-06 |
| SNP_A.K_994226_6_5827705  | 6 | 5827705  | 1.22E-10 | 0.12207 | 299 | 0.218749157 | 1.43E-06 |
| SNP_A.K_998204_6_6184534  | 6 | 6184534  | 1.25E-10 | 0.09699 | 299 | 0.218612866 | 1.45E-06 |
| SNP_A.K_995479_6_5938571  | 6 | 5938571  | 1.25E-10 | 0.08863 | 299 | 0.218575758 | 1.45E-06 |
| SNP_A.K_994683_6_5880054  | 6 | 5880054  | 1.26E-10 | 0.08696 | 299 | 0.218519307 | 1.45E-06 |
| SNP_A.K_1000178_6_6351662 | 6 | 6351662  | 1.30E-10 | 0.08863 | 299 | 0.218297304 | 1.49E-06 |
| SNP_A.K_999547_6_6295268  | 6 | 6295268  | 1.31E-10 | 0.09699 | 299 | 0.21827985  | 1.49E-06 |
| SNP_A.K_997330_6_6088530  | 6 | 6088530  | 1.32E-10 | 0.09866 | 299 | 0.218212941 | 1.49E-06 |
| SNP_A.K_999921_6_6333270  | 6 | 6333270  | 1.32E-10 | 0.12876 | 299 | 0.218188464 | 1.49E-06 |
| SNP_A.K_999600_6_6299479  | 6 | 6299479  | 1.35E-10 | 0.08528 | 299 | 0.218050871 | 1.51E-06 |
| SNP_A.K_995786_6_5950706  | 6 | 5950706  | 1.38E-10 | 0.08696 | 299 | 0.217906507 | 1.53E-06 |
| SNP_A.K_999446_6_6290665  | 6 | 6290665  | 1.43E-10 | 0.08863 | 299 | 0.217645403 | 1.58E-06 |
| SNP_A.K_994160_6_5820762  | 6 | 5820762  | 1.45E-10 | 0.11706 | 299 | 0.217555703 | 1.58E-06 |
| SNP_A.K_998140_6_6177028  | 6 | 6177028  | 1.45E-10 | 0.09866 | 299 | 0.217547135 | 1.58E-06 |
| SNP_A.K_993967_6_5804373  | 6 | 5804373  | 1.46E-10 | 0.11371 | 299 | 0.217503734 | 1.58E-06 |
| SNP_A.K_999719_6_6308998  | 6 | 6308998  | 1.46E-10 | 0.08863 | 299 | 0.217500778 | 1.58E-06 |
| SNP_A.K_998346_6_6190557  | 6 | 6190557  | 1.47E-10 | 0.09699 | 299 | 0.217443201 | 1.59E-06 |
| SNP_A.K_997674_6_6142130  | 6 | 6142130  | 1.51E-10 | 0.09866 | 299 | 0.217284678 | 1.62E-06 |
| SNP_A.K_999200_6_6265562  | 6 | 6265562  | 1.53E-10 | 0.09197 | 299 | 0.217159067 | 1.64E-06 |

|                           |   |          |          |         |     |             |          |
|---------------------------|---|----------|----------|---------|-----|-------------|----------|
| SNP_A.K_999930_6_6333766  | 6 | 6333766  | 1.64E-10 | 0.12709 | 299 | 0.2167033   | 1.74E-06 |
| SNP_A.K_999506_6_6293835  | 6 | 6293835  | 1.69E-10 | 0.08696 | 299 | 0.216477565 | 1.78E-06 |
| SNP_A.K_1000567_6_6396433 | 6 | 6396433  | 1.71E-10 | 0.08194 | 299 | 0.216390543 | 1.80E-06 |
| SNP_A.K_1000288_6_6368327 | 6 | 6368327  | 1.82E-10 | 0.08863 | 299 | 0.215937673 | 1.91E-06 |
| SNP_A.K_1002807_6_6620235 | 6 | 6620235  | 2.02E-10 | 0.11037 | 299 | 0.215222312 | 2.10E-06 |
| SNP_A.K_994230_6_5830491  | 6 | 5830491  | 2.06E-10 | 0.12709 | 299 | 0.215087771 | 2.13E-06 |
| SNP_A.K_999763_6_6312704  | 6 | 6312704  | 2.20E-10 | 0.11204 | 299 | 0.214621477 | 2.27E-06 |
| SNP_A.K_1000276_6_6367416 | 6 | 6367416  | 2.32E-10 | 0.08863 | 299 | 0.214258931 | 2.38E-06 |
| SNP_A.K_325606_2_9916262  | 2 | 9916262  | 2.37E-10 | 0.02341 | 299 | 0.214110679 | 2.42E-06 |
| SNP_A.K_994168_6_5821410  | 6 | 5821410  | 2.40E-10 | 0.11371 | 299 | 0.214002085 | 2.44E-06 |
| SNP_A.K_996670_6_6016112  | 6 | 6016112  | 2.47E-10 | 0.09197 | 299 | 0.213824657 | 2.49E-06 |
| SNP_A.K_999424_6_6287793  | 6 | 6287793  | 2.81E-10 | 0.08696 | 299 | 0.212914965 | 2.82E-06 |
| SNP_A.K_996853_6_6030903  | 6 | 6030903  | 2.82E-10 | 0.08361 | 299 | 0.212899028 | 2.82E-06 |
| SNP_A.K_998664_6_6215959  | 6 | 6215959  | 2.88E-10 | 0.08863 | 299 | 0.212748261 | 2.87E-06 |
| SNP_A.K_997774_6_6146123  | 6 | 6146123  | 2.97E-10 | 0.10033 | 299 | 0.212535703 | 2.94E-06 |
| SNP_A.K_999039_6_6249543  | 6 | 6249543  | 3.06E-10 | 0.08863 | 299 | 0.212308196 | 3.02E-06 |
| SNP_A.K_994895_6_5900108  | 6 | 5900108  | 3.08E-10 | 0.08863 | 299 | 0.212269665 | 3.03E-06 |
| SNP_A.K_999697_6_6308164  | 6 | 6308164  | 3.11E-10 | 0.09866 | 299 | 0.212198968 | 3.04E-06 |
| SNP_A.K_325944_2_9963856  | 2 | 9963856  | 3.37E-10 | 0.02341 | 299 | 0.211637843 | 3.28E-06 |
| SNP_A.K_996162_6_5970569  | 6 | 5970569  | 3.66E-10 | 0.09866 | 299 | 0.211064866 | 3.55E-06 |
| SNP_A.K_995055_6_5914207  | 6 | 5914207  | 3.70E-10 | 0.0903  | 299 | 0.210990231 | 3.57E-06 |
| SNP_A.K_996665_6_6015908  | 6 | 6015908  | 3.74E-10 | 0.10368 | 299 | 0.210908237 | 3.59E-06 |
| SNP_A.K_998861_6_6229232  | 6 | 6229232  | 3.83E-10 | 0.09197 | 299 | 0.210749    | 3.66E-06 |
| SNP_A.K_1000595_6_6398937 | 6 | 6398937  | 3.94E-10 | 0.08696 | 299 | 0.210557665 | 3.74E-06 |
| SNP_A.K_996458_6_6002348  | 6 | 6002348  | 3.95E-10 | 0.10368 | 299 | 0.210527993 | 3.74E-06 |
| SNP_A.K_994340_6_5847625  | 6 | 5847625  | 3.99E-10 | 0.12207 | 299 | 0.210474658 | 3.75E-06 |
| SNP_A.K_999498_6_6293602  | 6 | 6293602  | 4.12E-10 | 0.08194 | 299 | 0.210239046 | 3.86E-06 |
| SNP_A.K_1001102_6_6442110 | 6 | 6442110  | 4.14E-10 | 0.12207 | 299 | 0.210214009 | 3.86E-06 |
| SNP_A.K_993757_6_5790986  | 6 | 5790986  | 4.16E-10 | 0.16555 | 299 | 0.210167446 | 3.87E-06 |
| SNP_A.K_994174_6_5821928  | 6 | 5821928  | 4.20E-10 | 0.11873 | 299 | 0.210116707 | 3.88E-06 |
| SNP_A.K_999214_6_6267616  | 6 | 6267616  | 4.21E-10 | 0.08027 | 299 | 0.210089434 | 3.88E-06 |
| SNP_A.K_998025_6_6166760  | 6 | 6166760  | 4.25E-10 | 0.10201 | 299 | 0.210021393 | 3.90E-06 |
| SNP_A.K_328398_2_10257252 | 2 | 10257252 | 4.42E-10 | 0.02174 | 299 | 0.209747133 | 4.04E-06 |
| SNP_A.K_993783_6_5793279  | 6 | 5793279  | 4.57E-10 | 0.08027 | 299 | 0.209524008 | 4.15E-06 |
| SNP_A.K_995342_6_5926823  | 6 | 5926823  | 4.59E-10 | 0.09197 | 299 | 0.209488605 | 4.15E-06 |
| SNP_A.K_999199_6_6265468  | 6 | 6265468  | 4.74E-10 | 0.08863 | 299 | 0.209266037 | 4.27E-06 |
| SNP_A.K_993618_6_5779707  | 6 | 5779707  | 5.13E-10 | 0.09532 | 299 | 0.208718551 | 4.60E-06 |
| SNP_A.K_999631_6_6301335  | 6 | 6301335  | 5.26E-10 | 0.09197 | 299 | 0.208543755 | 4.68E-06 |
| SNP_A.K_994858_6_5895786  | 6 | 5895786  | 5.26E-10 | 0.09699 | 299 | 0.208542749 | 4.68E-06 |
| SNP_A.K_999627_6_6301282  | 6 | 6301282  | 5.48E-10 | 0.08361 | 299 | 0.208259434 | 4.85E-06 |
| SNP_A.K_996134_6_5964453  | 6 | 5964453  | 5.93E-10 | 0.09197 | 299 | 0.207710447 | 5.23E-06 |
| SNP_A.K_997231_6_6058815  | 6 | 6058815  | 5.97E-10 | 0.10368 | 299 | 0.207664277 | 5.24E-06 |
| SNP_A.K_993865_6_5797885  | 6 | 5797885  | 6.10E-10 | 0.12709 | 299 | 0.207516825 | 5.32E-06 |
| SNP_A.K_998155_6_6179298  | 6 | 6179298  | 6.11E-10 | 0.09365 | 299 | 0.207499297 | 5.32E-06 |
| SNP_A.K_997217_6_6058367  | 6 | 6058367  | 6.41E-10 | 0.10033 | 299 | 0.207172494 | 5.56E-06 |
| SNP_A.K_994724_6_5883300  | 6 | 5883300  | 6.89E-10 | 0.1505  | 299 | 0.206669915 | 5.91E-06 |
| SNP_A.K_997319_6_6086995  | 6 | 6086995  | 6.89E-10 | 0.11204 | 299 | 0.206665577 | 5.91E-06 |
| SNP_A.K_992846_6_5681254  | 6 | 5681254  | 6.90E-10 | 0.11706 | 299 | 0.206655641 | 5.91E-06 |
| SNP_A.K_999855_6_6328477  | 6 | 6328477  | 6.93E-10 | 0.10368 | 299 | 0.206625551 | 5.91E-06 |
| SNP_A.K_998121_6_6174048  | 6 | 6174048  | 7.00E-10 | 0.10702 | 299 | 0.206559968 | 5.94E-06 |

|                             |    |          |          |         |     |             |          |
|-----------------------------|----|----------|----------|---------|-----|-------------|----------|
| SNP_A.K_993063_6_5702831    | 6  | 5702831  | 7.21E-10 | 0.11538 | 299 | 0.206354677 | 6.10E-06 |
| SNP_A.K_1002263_6_6558482   | 6  | 6558482  | 7.25E-10 | 0.0903  | 299 | 0.206315658 | 6.11E-06 |
| SNP_A.K_996716_6_6018571    | 6  | 6018571  | 7.30E-10 | 0.09365 | 299 | 0.206264403 | 6.13E-06 |
| SNP_A.K_999432_6_6288177    | 6  | 6288177  | 7.33E-10 | 0.13712 | 299 | 0.206237196 | 6.13E-06 |
| SNP_A.K_2080292_12_27255011 | 12 | 27255011 | 7.41E-10 | 0.01003 | 299 | 0.206165269 | 6.17E-06 |
| SNP_A.K_1364824_8_6045628   | 8  | 6045628  | 7.45E-10 | 0.04348 | 299 | 0.206120314 | 6.18E-06 |
| SNP_A.K_999136_6_6263123    | 6  | 6263123  | 7.72E-10 | 0.09866 | 299 | 0.205880757 | 6.37E-06 |
| SNP_A.K_327043_2_10084832   | 2  | 10084832 | 8.22E-10 | 0.03512 | 299 | 0.205439283 | 6.77E-06 |
| SNP_A.K_994389_6_5854738    | 6  | 5854738  | 8.51E-10 | 0.12542 | 299 | 0.205205447 | 6.97E-06 |
| SNP_A.K_993111_6_5708648    | 6  | 5708648  | 8.55E-10 | 0.10702 | 299 | 0.205166015 | 6.98E-06 |
| SNP_A.K_996551_6_6008529    | 6  | 6008529  | 8.71E-10 | 0.09365 | 299 | 0.205037791 | 7.09E-06 |
| SNP_A.K_998056_6_6167657    | 6  | 6167657  | 8.80E-10 | 0.10033 | 299 | 0.204968785 | 7.13E-06 |
| SNP_A.K_998362_6_6190837    | 6  | 6190837  | 8.88E-10 | 0.09197 | 299 | 0.204908848 | 7.16E-06 |
| SNP_A.K_999270_6_6275636    | 6  | 6275636  | 9.16E-10 | 0.14381 | 299 | 0.204695269 | 7.36E-06 |
| SNP_A.K_994499_6_5869880    | 6  | 5869880  | 9.40E-10 | 0.1505  | 299 | 0.204513927 | 7.52E-06 |
| SNP_A.K_325590_2_9913723    | 2  | 9913723  | 9.52E-10 | 0.02508 | 299 | 0.204425813 | 7.57E-06 |
| SNP_A.K_998120_6_6173570    | 6  | 6173570  | 9.53E-10 | 0.09197 | 299 | 0.204415299 | 7.57E-06 |
| SNP_A.K_993062_6_5702799    | 6  | 5702799  | 9.73E-10 | 0.11873 | 299 | 0.204276579 | 7.70E-06 |
| SNP_A.K_326998_2_10078971   | 2  | 10078971 | 9.82E-10 | 0.02508 | 299 | 0.204210602 | 7.74E-06 |
| SNP_A.K_993364_6_5742301    | 6  | 5742301  | 9.89E-10 | 0.11706 | 299 | 0.204159144 | 7.77E-06 |
| SNP_A.K_999456_6_6291030    | 6  | 6291030  | 9.93E-10 | 0.08696 | 299 | 0.204132332 | 7.77E-06 |
| SNP_A.K_998159_6_6180389    | 6  | 6180389  | 1.09E-09 | 0.09532 | 299 | 0.203481086 | 8.50E-06 |
| SNP_A.K_997168_6_6053127    | 6  | 6053127  | 1.09E-09 | 0.09699 | 299 | 0.20346415  | 8.50E-06 |
| SNP_A.K_1198450_7_7870036   | 7  | 7870036  | 1.14E-09 | 0.01338 | 299 | 0.203176178 | 8.82E-06 |
| SNP_A.K_307510_2_7413964    | 2  | 7413964  | 1.15E-09 | 0.23913 | 299 | 0.203114333 | 8.87E-06 |
| SNP_A.K_993978_6_5805283    | 6  | 5805283  | 1.18E-09 | 0.12375 | 299 | 0.202963351 | 9.03E-06 |
| SNP_A.K_999628_6_6301297    | 6  | 6301297  | 1.19E-09 | 0.09365 | 299 | 0.202887943 | 9.10E-06 |
| SNP_A.K_998778_6_6221159    | 6  | 6221159  | 1.24E-09 | 0.13545 | 299 | 0.202599278 | 9.45E-06 |
| SNP_A.K_995371_6_5929105    | 6  | 5929105  | 1.30E-09 | 0.10033 | 299 | 0.202263331 | 9.89E-06 |
| SNP_A.K_996441_6_6001052    | 6  | 6001052  | 1.31E-09 | 0.09365 | 299 | 0.202239043 | 9.89E-06 |
| SNP_A.K_497857_3_5598569    | 3  | 5598569  | 1.34E-09 | 0.01338 | 299 | 0.202071352 | 1.01E-05 |
| SNP_A.K_995793_6_5950773    | 6  | 5950773  | 1.39E-09 | 0.12709 | 299 | 0.201825059 | 1.04E-05 |
| SNP_A.K_994761_6_5887861    | 6  | 5887861  | 1.39E-09 | 0.10033 | 299 | 0.201803684 | 1.04E-05 |
| SNP_A.K_992745_6_5678115    | 6  | 5678115  | 1.44E-09 | 0.11204 | 299 | 0.201541388 | 1.08E-05 |
| SNP_A.K_978593_6_1736459    | 6  | 1736459  | 1.50E-09 | 0.11873 | 299 | 0.201273405 | 1.12E-05 |
| SNP_A.K_1000603_6_6399151   | 6  | 6399151  | 1.53E-09 | 0.10033 | 299 | 0.201153436 | 1.13E-05 |
| SNP_A.K_993188_6_5716112    | 6  | 5716112  | 1.53E-09 | 0.11204 | 299 | 0.201141491 | 1.13E-05 |
| SNP_A.K_998831_6_6226827    | 6  | 6226827  | 1.57E-09 | 0.08361 | 299 | 0.200985173 | 1.15E-05 |
| SNP_A.K_1364816_8_6043498   | 8  | 6043498  | 1.59E-09 | 0.05017 | 299 | 0.200864649 | 1.16E-05 |
| SNP_A.K_999648_6_6302685    | 6  | 6302685  | 1.60E-09 | 0.09365 | 299 | 0.200855158 | 1.16E-05 |
| SNP_A.K_999113_6_6257528    | 6  | 6257528  | 1.60E-09 | 0.10368 | 299 | 0.200847193 | 1.16E-05 |
| SNP_A.K_1002710_6_6612229   | 6  | 6612229  | 1.65E-09 | 0.11706 | 299 | 0.200622778 | 1.20E-05 |
| SNP_A.K_999434_6_6288270    | 6  | 6288270  | 1.66E-09 | 0.15552 | 299 | 0.200573799 | 1.20E-05 |
| SNP_A.K_992450_6_5647061    | 6  | 5647061  | 1.67E-09 | 0.12207 | 299 | 0.200526506 | 1.21E-05 |
| SNP_A.K_995642_6_5945927    | 6  | 5945927  | 1.70E-09 | 0.14047 | 299 | 0.200438939 | 1.22E-05 |
| SNP_A.K_1000548_6_6393688   | 6  | 6393688  | 1.78E-09 | 0.10201 | 299 | 0.200120297 | 1.27E-05 |
| SNP_A.K_993238_6_5723513    | 6  | 5723513  | 1.88E-09 | 0.11873 | 299 | 0.199738343 | 1.34E-05 |
| SNP_A.K_993349_6_5740837    | 6  | 5740837  | 1.91E-09 | 0.11706 | 299 | 0.199604959 | 1.36E-05 |
| SNP_A.K_1000003_6_6340934   | 6  | 6340934  | 1.93E-09 | 0.13043 | 299 | 0.199533706 | 1.37E-05 |
| SNP_A.K_999188_6_6265147    | 6  | 6265147  | 1.95E-09 | 0.09532 | 299 | 0.199476845 | 1.37E-05 |

|                            |   |          |          |         |     |             |          |
|----------------------------|---|----------|----------|---------|-----|-------------|----------|
| SNP_A.K_997841_6_6151654   | 6 | 6151654  | 1.95E-09 | 0.09197 | 299 | 0.199473173 | 1.37E-05 |
| SNP_A.K_999398_6_6286418   | 6 | 6286418  | 2.07E-09 | 0.12207 | 299 | 0.199065592 | 1.45E-05 |
| SNP_A.K_992715_6_5675706   | 6 | 5675706  | 2.11E-09 | 0.12207 | 299 | 0.198946769 | 1.47E-05 |
| SNP_A.K_998348_6_6190678   | 6 | 6190678  | 2.15E-09 | 0.0903  | 299 | 0.198799538 | 1.50E-05 |
| SNP_A.K_998882_6_6230362   | 6 | 6230362  | 2.22E-09 | 0.1087  | 299 | 0.198568743 | 1.54E-05 |
| SNP_A.K_993059_6_5702626   | 6 | 5702626  | 2.24E-09 | 0.11873 | 299 | 0.198524494 | 1.55E-05 |
| SNP_A.K_998080_6_6170102   | 6 | 6170102  | 2.32E-09 | 0.10201 | 299 | 0.198291061 | 1.60E-05 |
| SNP_A.K_994910_6_5905982   | 6 | 5905982  | 2.33E-09 | 0.10033 | 299 | 0.198237357 | 1.60E-05 |
| SNP_A.K_994650_6_5877851   | 6 | 5877851  | 2.39E-09 | 0.08863 | 299 | 0.198076888 | 1.64E-05 |
| SNP_A.K_993130_6_5709698   | 6 | 5709698  | 2.41E-09 | 0.13211 | 299 | 0.198026611 | 1.64E-05 |
| SNP_A.K_997576_6_6109635   | 6 | 6109635  | 2.50E-09 | 0.09866 | 299 | 0.197777197 | 1.70E-05 |
| SNP_A.K_995844_6_5952431   | 6 | 5952431  | 2.52E-09 | 0.1689  | 299 | 0.197721212 | 1.71E-05 |
| SNP_A.K_998106_6_6171179   | 6 | 6171179  | 2.53E-09 | 0.09699 | 299 | 0.197671522 | 1.71E-05 |
| SNP_A.K_1599657_9_18583878 | 9 | 18583878 | 2.56E-09 | 0.03512 | 299 | 0.197599639 | 1.72E-05 |
| SNP_A.K_997667_6_6141730   | 6 | 6141730  | 2.57E-09 | 0.09699 | 299 | 0.197571555 | 1.72E-05 |
| SNP_A.K_996232_6_5976271   | 6 | 5976271  | 2.57E-09 | 0.09866 | 299 | 0.197569264 | 1.72E-05 |
| SNP_A.K_1004738_6_6926541  | 6 | 6926541  | 2.63E-09 | 0.11204 | 299 | 0.197420218 | 1.75E-05 |
| SNP_A.K_993296_6_5734229   | 6 | 5734229  | 2.65E-09 | 0.11204 | 299 | 0.197356248 | 1.76E-05 |
| SNP_A.K_996493_6_6003854   | 6 | 6003854  | 2.65E-09 | 0.09699 | 299 | 0.197355254 | 1.76E-05 |
| SNP_A.K_999637_6_6301795   | 6 | 6301795  | 2.73E-09 | 0.09699 | 299 | 0.197163784 | 1.80E-05 |
| SNP_A.K_994617_6_5876549   | 6 | 5876549  | 2.77E-09 | 0.16722 | 299 | 0.197066837 | 1.82E-05 |
| SNP_A.K_994205_6_5825330   | 6 | 5825330  | 2.78E-09 | 0.10201 | 299 | 0.197030353 | 1.83E-05 |
| SNP_A.K_998776_6_6221062   | 6 | 6221062  | 2.88E-09 | 0.10702 | 299 | 0.1967979   | 1.88E-05 |
| SNP_A.K_995381_6_5930184   | 6 | 5930184  | 2.90E-09 | 0.08696 | 299 | 0.196744383 | 1.89E-05 |
| SNP_A.K_993985_6_5806596   | 6 | 5806596  | 2.95E-09 | 0.12207 | 299 | 0.196634612 | 1.92E-05 |
| SNP_A.K_997932_6_6160193   | 6 | 6160193  | 3.01E-09 | 0.09866 | 299 | 0.196501591 | 1.95E-05 |
| SNP_A.K_994830_6_5893166   | 6 | 5893166  | 3.05E-09 | 0.12207 | 299 | 0.196409747 | 1.97E-05 |
| SNP_A.K_998444_6_6199199   | 6 | 6199199  | 3.14E-09 | 0.18729 | 299 | 0.196209278 | 2.02E-05 |
| SNP_A.K_999717_6_6308732   | 6 | 6308732  | 3.35E-09 | 0.10535 | 299 | 0.19576584  | 2.15E-05 |
| SNP_A.K_1000145_6_6348397  | 6 | 6348397  | 3.37E-09 | 0.14716 | 299 | 0.195724509 | 2.15E-05 |
| SNP_A.K_997943_6_6161115   | 6 | 6161115  | 3.37E-09 | 0.10033 | 299 | 0.195715328 | 2.15E-05 |
| SNP_A.K_994781_6_5888777   | 6 | 5888777  | 3.48E-09 | 0.09197 | 299 | 0.195506167 | 2.21E-05 |
| SNP_A.K_997484_6_6103259   | 6 | 6103259  | 3.55E-09 | 0.11538 | 299 | 0.195361241 | 2.25E-05 |
| SNP_A.K_1000308_6_6371694  | 6 | 6371694  | 3.57E-09 | 0.08696 | 299 | 0.195321496 | 2.26E-05 |
| SNP_A.K_994099_6_5814805   | 6 | 5814805  | 3.59E-09 | 0.16555 | 299 | 0.195276317 | 2.27E-05 |
| SNP_A.K_997693_6_6142570   | 6 | 6142570  | 3.66E-09 | 0.11538 | 299 | 0.195152155 | 2.30E-05 |
| SNP_A.K_1003050_6_6653023  | 6 | 6653023  | 3.70E-09 | 0.1505  | 299 | 0.195084029 | 2.32E-05 |
| SNP_A.K_996866_6_6031194   | 6 | 6031194  | 3.71E-09 | 0.0903  | 299 | 0.195051438 | 2.32E-05 |
| SNP_A.K_325949_2_9964036   | 2 | 9964036  | 3.74E-09 | 0.04682 | 299 | 0.195004907 | 2.32E-05 |
| SNP_A.K_325545_2_9901600   | 2 | 9901600  | 3.74E-09 | 0.03512 | 299 | 0.195004067 | 2.32E-05 |
| SNP_A.K_306863_2_7361415   | 2 | 7361415  | 4.03E-09 | 0.25585 | 299 | 0.19448783  | 2.50E-05 |
| SNP_A.K_994980_6_5909464   | 6 | 5909464  | 4.20E-09 | 0.08696 | 299 | 0.194206258 | 2.60E-05 |
| SNP_A.K_999266_6_6275506   | 6 | 6275506  | 4.27E-09 | 0.11037 | 299 | 0.194095652 | 2.63E-05 |
| SNP_A.K_1198617_7_7902877  | 7 | 7902877  | 4.49E-09 | 0.01338 | 299 | 0.193752478 | 2.76E-05 |
| SNP_A.K_993095_6_5707541   | 6 | 5707541  | 4.63E-09 | 0.11371 | 299 | 0.193537507 | 2.84E-05 |
| SNP_A.K_993046_6_5701032   | 6 | 5701032  | 4.76E-09 | 0.11371 | 299 | 0.193358821 | 2.90E-05 |
| SNP_A.K_325603_2_9915633   | 2 | 9915633  | 4.86E-09 | 0.02843 | 299 | 0.193213371 | 2.96E-05 |
| SNP_A.K_996676_6_6016570   | 6 | 6016570  | 4.91E-09 | 0.10033 | 299 | 0.193145828 | 2.98E-05 |
| SNP_A.K_996900_6_6033059   | 6 | 6033059  | 5.11E-09 | 0.12876 | 299 | 0.192867709 | 3.09E-05 |
| SNP_A.K_993138_6_5710380   | 6 | 5710380  | 5.47E-09 | 0.11371 | 299 | 0.192409335 | 3.30E-05 |

|                           |   |          |          |         |     |             |          |
|---------------------------|---|----------|----------|---------|-----|-------------|----------|
| SNP_A.K_1000268_6_6360016 | 6 | 6360016  | 5.53E-09 | 0.0903  | 299 | 0.192331104 | 3.33E-05 |
| SNP_A.K_996861_6_6031038  | 6 | 6031038  | 5.57E-09 | 0.10033 | 299 | 0.192275319 | 3.34E-05 |
| SNP_A.K_997575_6_6109614  | 6 | 6109614  | 5.64E-09 | 0.11037 | 299 | 0.192192965 | 3.37E-05 |
| SNP_A.K_153549_1_23835205 | 1 | 23835205 | 5.81E-09 | 0.01505 | 299 | 0.191993795 | 3.46E-05 |
| SNP_A.K_326609_2_10035213 | 2 | 10035213 | 6.04E-09 | 0.02843 | 299 | 0.191731305 | 3.59E-05 |
| SNP_A.K_994384_6_5854540  | 6 | 5854540  | 6.06E-09 | 0.12709 | 299 | 0.19170841  | 3.59E-05 |
| SNP_A.K_993016_6_5698260  | 6 | 5698260  | 6.20E-09 | 0.11371 | 299 | 0.191552293 | 3.66E-05 |
| SNP_A.K_997620_6_6139730  | 6 | 6139730  | 6.22E-09 | 0.10368 | 299 | 0.191532092 | 3.66E-05 |
| SNP_A.K_996772_6_6025063  | 6 | 6025063  | 6.26E-09 | 0.1087  | 299 | 0.191477797 | 3.68E-05 |
| SNP_A.K_992718_6_5675999  | 6 | 5675999  | 6.43E-09 | 0.11706 | 299 | 0.191303506 | 3.77E-05 |
| SNP_A.K_994382_6_5854415  | 6 | 5854415  | 6.45E-09 | 0.13043 | 299 | 0.191276028 | 3.77E-05 |
| SNP_A.K_992650_6_5668869  | 6 | 5668869  | 6.66E-09 | 0.13211 | 299 | 0.191061662 | 3.88E-05 |
| SNP_A.K_996430_6_6000692  | 6 | 6000692  | 6.70E-09 | 0.09699 | 299 | 0.191023156 | 3.89E-05 |
| SNP_A.K_999712_6_6308691  | 6 | 6308691  | 6.76E-09 | 0.1505  | 299 | 0.190963475 | 3.91E-05 |
| SNP_A.K_993023_6_5698597  | 6 | 5698597  | 6.76E-09 | 0.11204 | 299 | 0.190961745 | 3.91E-05 |
| SNP_A.K_992553_6_5656995  | 6 | 5656995  | 7.24E-09 | 0.13378 | 299 | 0.190494171 | 4.17E-05 |
| SNP_A.K_1004070_6_6825388 | 6 | 6825388  | 7.24E-09 | 0.1087  | 299 | 0.190488005 | 4.17E-05 |
| SNP_A.K_997858_6_6154262  | 6 | 6154262  | 7.40E-09 | 0.1505  | 299 | 0.190345751 | 4.24E-05 |
| SNP_A.K_993011_6_5698041  | 6 | 5698041  | 7.58E-09 | 0.11371 | 299 | 0.190178105 | 4.33E-05 |
| SNP_A.K_996454_6_6002242  | 6 | 6002242  | 7.60E-09 | 0.10033 | 299 | 0.190161912 | 4.33E-05 |
| SNP_A.K_993467_6_5754363  | 6 | 5754363  | 7.89E-09 | 0.13043 | 299 | 0.18990708  | 4.48E-05 |
| SNP_A.K_1002178_6_6551261 | 6 | 6551261  | 7.90E-09 | 0.15552 | 299 | 0.189898521 | 4.48E-05 |
| SNP_A.K_992496_6_5652972  | 6 | 5652972  | 8.04E-09 | 0.11873 | 299 | 0.189777034 | 4.55E-05 |
| SNP_A.K_996136_6_5964491  | 6 | 5964491  | 8.15E-09 | 0.09197 | 299 | 0.189687801 | 4.60E-05 |
| SNP_A.K_992460_6_5651689  | 6 | 5651689  | 8.24E-09 | 0.11873 | 299 | 0.189611262 | 4.64E-05 |
| SNP_A.K_1363253_8_5767274 | 8 | 5767274  | 8.33E-09 | 0.00836 | 299 | 0.189535749 | 4.67E-05 |
| SNP_A.K_994063_6_5812365  | 6 | 5812365  | 8.39E-09 | 0.12207 | 299 | 0.189492171 | 4.69E-05 |
| SNP_A.K_306698_2_7341926  | 2 | 7341926  | 8.52E-09 | 0.23244 | 299 | 0.189383676 | 4.75E-05 |
| SNP_A.K_1005628_6_7030955 | 6 | 7030955  | 8.56E-09 | 0.21572 | 299 | 0.189352197 | 4.76E-05 |
| SNP_A.K_992858_6_5681932  | 6 | 5681932  | 9.02E-09 | 0.11538 | 299 | 0.188993259 | 5.01E-05 |
| SNP_A.K_996395_6_5999382  | 6 | 5999382  | 9.18E-09 | 0.11037 | 299 | 0.188877564 | 5.08E-05 |
| SNP_A.K_998187_6_6183490  | 6 | 6183490  | 9.29E-09 | 0.09532 | 299 | 0.188798824 | 5.13E-05 |
| SNP_A.K_995998_6_5957240  | 6 | 5957240  | 9.52E-09 | 0.17726 | 299 | 0.188631278 | 5.24E-05 |
| SNP_A.K_993050_6_5701548  | 6 | 5701548  | 9.86E-09 | 0.11538 | 299 | 0.18839098  | 5.41E-05 |
| SNP_A.K_307042_2_7374688  | 2 | 7374688  | 9.98E-09 | 0.2408  | 299 | 0.188309537 | 5.45E-05 |
| SNP_A.K_8302_1_1541551    | 1 | 1541551  | 1.00E-08 | 0.00836 | 299 | 0.188292026 | 5.45E-05 |
| SNP_A.K_992636_6_5667426  | 6 | 5667426  | 1.00E-08 | 0.11538 | 299 | 0.188273973 | 5.45E-05 |
| SNP_A.K_996878_6_6031585  | 6 | 6031585  | 1.00E-08 | 0.09365 | 299 | 0.188273037 | 5.45E-05 |
| SNP_A.K_996483_6_6003523  | 6 | 6003523  | 1.04E-08 | 0.09197 | 299 | 0.188042564 | 5.63E-05 |
| SNP_A.K_993191_6_5716326  | 6 | 5716326  | 1.04E-08 | 0.11538 | 299 | 0.188010684 | 5.64E-05 |
| SNP_A.K_1364936_8_6060386 | 8 | 6060386  | 1.05E-08 | 0.08528 | 299 | 0.187983373 | 5.65E-05 |
| SNP_A.K_998936_6_6235674  | 6 | 6235674  | 1.07E-08 | 0.10368 | 299 | 0.187859581 | 5.73E-05 |
| SNP_A.K_992613_6_5665213  | 6 | 5665213  | 1.12E-08 | 0.1204  | 299 | 0.187510735 | 6.02E-05 |
| SNP_A.K_999789_6_6315470  | 6 | 6315470  | 1.16E-08 | 0.09532 | 299 | 0.187313425 | 6.18E-05 |
| SNP_A.K_995320_6_5926014  | 6 | 5926014  | 1.18E-08 | 0.1388  | 299 | 0.18715159  | 6.32E-05 |
| SNP_A.K_307278_2_7391064  | 2 | 7391064  | 1.23E-08 | 0.23746 | 299 | 0.186864705 | 6.56E-05 |
| SNP_A.K_993189_6_5716124  | 6 | 5716124  | 1.24E-08 | 0.11706 | 299 | 0.186857083 | 6.56E-05 |
| SNP_A.K_991466_6_5384404  | 6 | 5384404  | 1.26E-08 | 0.10201 | 299 | 0.186702277 | 6.70E-05 |
| SNP_A.K_997423_6_6098199  | 6 | 6098199  | 1.28E-08 | 0.12542 | 299 | 0.186601987 | 6.78E-05 |
| SNP_A.K_526927_3_11022317 | 3 | 11022317 | 1.32E-08 | 0.01171 | 299 | 0.186435061 | 6.93E-05 |



|                             |    |          |          |         |     |             |             |
|-----------------------------|----|----------|----------|---------|-----|-------------|-------------|
| SNP_A.K_1006018_6_7096695   | 6  | 7096695  | 1.32E-08 | 0.27926 | 299 | 0.186409256 | 6.94E-05    |
| SNP_A.K_999579_6_6297708    | 6  | 6297708  | 1.35E-08 | 0.09532 | 299 | 0.186264664 | 7.07E-05    |
| SNP_A.K_1002526_6_6581196   | 6  | 6581196  | 1.35E-08 | 0.18896 | 299 | 0.1862488   | 7.07E-05    |
| SNP_A.K_993096_6_5707553    | 6  | 5707553  | 1.36E-08 | 0.1087  | 299 | 0.186188045 | 7.12E-05    |
| SNP_A.K_994182_6_5822877    | 6  | 5822877  | 1.42E-08 | 0.08528 | 299 | 0.185937149 | 7.37E-05    |
| SNP_A.K_999652_6_6303233    | 6  | 6303233  | 1.47E-08 | 0.20234 | 299 | 0.185670457 | 7.64E-05    |
| SNP_A.K_998027_6_6166823    | 6  | 6166823  | 1.48E-08 | 0.11873 | 299 | 0.18565268  | 7.64E-05    |
| SNP_A.K_996412_6_5999758    | 6  | 5999758  | 1.48E-08 | 0.08194 | 299 | 0.185628911 | 7.65E-05    |
| SNP_A.K_993105_6_5708271    | 6  | 5708271  | 1.51E-08 | 0.11873 | 299 | 0.18551998  | 7.76E-05    |
| SNP_A.K_999654_6_6303294    | 6  | 6303294  | 1.52E-08 | 0.18729 | 299 | 0.185453178 | 7.81E-05    |
| SNP_A.K_999273_6_6275876    | 6  | 6275876  | 1.52E-08 | 0.11037 | 299 | 0.185439275 | 7.81E-05    |
| SNP_A.K_1830656_11_10572969 | 11 | 10572969 | 1.53E-08 | 0.16555 | 299 | 0.18541895  | 7.82E-05    |
| SNP_A.K_1000528_6_6391236   | 6  | 6391236  | 1.54E-08 | 0.10033 | 299 | 0.185369537 | 7.84E-05    |
| SNP_A.K_997297_6_6085744    | 6  | 6085744  | 1.54E-08 | 0.11371 | 299 | 0.185367603 | 7.84E-05    |
| SNP_A.K_326923_2_10070797   | 2  | 10070797 | 1.55E-08 | 0.06689 | 299 | 0.185330154 | 7.85E-05    |
| SNP_A.K_997199_6_6056708    | 6  | 6056708  | 1.55E-08 | 0.12709 | 299 | 0.185319017 | 7.85E-05    |
| SNP_A.K_978953_6_1826585    | 6  | 1826585  | 1.68E-08 | 0.29599 | 299 | 0.184787258 | 8.48E-05    |
| SNP_A.K_1364929_8_6059874   | 8  | 6059874  | 1.71E-08 | 0.07191 | 299 | 0.184657268 | 8.62E-05    |
| SNP_A.K_1005393_6_7011650   | 6  | 7011650  | 1.75E-08 | 0.27759 | 299 | 0.184520159 | 8.77E-05    |
| SNP_A.K_995322_6_5926036    | 6  | 5926036  | 1.76E-08 | 0.13545 | 299 | 0.184477492 | 8.81E-05    |
| SNP_A.K_1005601_6_7029459   | 6  | 7029459  | 1.79E-08 | 0.28428 | 299 | 0.184332113 | 8.98E-05    |
| SNP_A.K_998789_6_6222413    | 6  | 6222413  | 1.82E-08 | 0.12375 | 299 | 0.184235283 | 9.07E-05    |
| SNP_A.K_999701_6_6308189    | 6  | 6308189  | 1.82E-08 | 0.1689  | 299 | 0.184231349 | 9.07E-05    |
| SNP_A.K_992514_6_5654471    | 6  | 5654471  | 1.84E-08 | 0.11706 | 299 | 0.184177915 | 9.12E-05    |
| SNP_A.K_999896_6_6331874    | 6  | 6331874  | 1.85E-08 | 0.1806  | 299 | 0.184143599 | 9.13E-05    |
| SNP_A.K_1371260_8_7816922   | 8  | 7816922  | 1.85E-08 | 0.00669 | 299 | 0.18410837  | 9.13E-05    |
| SNP_A.K_1371321_8_7820142   | 8  | 7820142  | 1.85E-08 | 0.00669 | 299 | 0.18410837  | 9.13E-05    |
| SNP_A.K_1371325_8_7820415   | 8  | 7820415  | 1.85E-08 | 0.00669 | 299 | 0.18410837  | 9.13E-05    |
| SNP_A.K_993107_6_5708482    | 6  | 5708482  | 1.90E-08 | 0.11706 | 299 | 0.183930328 | 9.35E-05    |
| SNP_A.K_1002655_6_6601669   | 6  | 6601669  | 1.99E-08 | 0.10535 | 299 | 0.183644049 | 9.73E-05    |
| SNP_A.K_1003561_6_6739023   | 6  | 6739023  | 2.02E-08 | 0.00669 | 299 | 0.183523057 | 9.88E-05    |
| SNP_A.K_998103_6_6171160    | 6  | 6171160  | 2.03E-08 | 0.1087  | 299 | 0.183493967 | 9.90E-05    |
| SNP_A.K_991438_6_5269712    | 6  | 5269712  | 2.07E-08 | 0.04515 | 299 | 0.183356024 | 0.000100832 |
| SNP_A.K_996128_6_5964208    | 6  | 5964208  | 2.18E-08 | 0.09699 | 299 | 0.183015795 | 0.000105796 |
| SNP_A.K_995631_6_5944115    | 6  | 5944115  | 2.25E-08 | 0.11538 | 299 | 0.182806443 | 0.000108875 |
| SNP_A.K_994729_6_5884185    | 6  | 5884185  | 2.30E-08 | 0.14883 | 299 | 0.182666055 | 0.000110906 |
| SNP_A.K_992947_6_5690053    | 6  | 5690053  | 2.33E-08 | 0.11037 | 299 | 0.182561744 | 0.000112373 |
| SNP_A.K_994646_6_5877804    | 6  | 5877804  | 2.34E-08 | 0.18227 | 299 | 0.182541893 | 0.000112444 |
| SNP_A.K_1004693_6_6918935   | 6  | 6918935  | 2.42E-08 | 0.43144 | 299 | 0.182310319 | 0.000116103 |
| SNP_A.K_993211_6_5719217    | 6  | 5719217  | 2.59E-08 | 0.11037 | 299 | 0.181854967 | 0.00012393  |
| SNP_A.K_994849_6_5894471    | 6  | 5894471  | 2.70E-08 | 0.0903  | 299 | 0.181567786 | 0.000128899 |
| SNP_A.K_998342_6_6190281    | 6  | 6190281  | 2.71E-08 | 0.09365 | 299 | 0.181559118 | 0.000128899 |
| SNP_A.K_995798_6_5950839    | 6  | 5950839  | 2.73E-08 | 0.20401 | 299 | 0.181511267 | 0.000129521 |
| SNP_A.K_996409_6_5999704    | 6  | 5999704  | 2.77E-08 | 0.09866 | 299 | 0.181392724 | 0.00013152  |
| SNP_A.K_997460_6_6100243    | 6  | 6100243  | 2.78E-08 | 0.11538 | 299 | 0.18137351  | 0.000131596 |
| SNP_A.K_306726_2_7345691    | 2  | 7345691  | 2.81E-08 | 0.23746 | 299 | 0.181299525 | 0.000132748 |
| SNP_A.K_994212_6_5825721    | 6  | 5825721  | 2.89E-08 | 0.12375 | 299 | 0.181116982 | 0.000136086 |
| SNP_A.K_307161_2_7382785    | 2  | 7382785  | 2.94E-08 | 0.24415 | 299 | 0.180997347 | 0.000138213 |
| SNP_A.K_993156_6_5710885    | 6  | 5710885  | 2.95E-08 | 0.1204  | 299 | 0.180976752 | 0.000138324 |
| SNP_A.K_992511_6_5654191    | 6  | 5654191  | 3.10E-08 | 0.11037 | 299 | 0.180649671 | 0.000144884 |

|                            |   |          |          |         |     |             |             |
|----------------------------|---|----------|----------|---------|-----|-------------|-------------|
| SNP_A.K_1005323_6_7006059  | 6 | 7006059  | 3.22E-08 | 0.12709 | 299 | 0.180379792 | 0.000150475 |
| SNP_A.K_993512_6_5763550   | 6 | 5763550  | 3.24E-08 | 0.11538 | 299 | 0.180339301 | 0.000151045 |
| SNP_A.K_1390296_8_10172119 | 8 | 10172119 | 3.27E-08 | 0.05518 | 299 | 0.180287689 | 0.000151868 |
| SNP_A.K_993321_6_5738277   | 6 | 5738277  | 3.32E-08 | 0.12709 | 299 | 0.18017528  | 0.000154083 |
| SNP_A.K_997951_6_6162089   | 6 | 6162089  | 3.35E-08 | 0.09532 | 299 | 0.180130625 | 0.000154765 |
| SNP_A.K_1005375_6_7010344  | 6 | 7010344  | 3.47E-08 | 0.2893  | 299 | 0.179883809 | 0.000160195 |
| SNP_A.K_993352_6_5740917   | 6 | 5740917  | 3.56E-08 | 0.11873 | 299 | 0.179706599 | 0.000163993 |
| SNP_A.K_1364977_8_6063489  | 8 | 6063489  | 3.57E-08 | 0.03177 | 299 | 0.179696531 | 0.000163993 |
| SNP_A.K_995327_6_5926112   | 6 | 5926112  | 3.61E-08 | 0.13043 | 299 | 0.179626284 | 0.00016535  |
| SNP_A.K_993280_6_5730059   | 6 | 5730059  | 3.78E-08 | 0.11706 | 299 | 0.179314926 | 0.000172811 |
| SNP_A.K_1364729_8_6038354  | 8 | 6038354  | 3.79E-08 | 0.03344 | 299 | 0.179284655 | 0.00017321  |
| SNP_A.K_1005319_6_7005641  | 6 | 7005641  | 3.89E-08 | 0.2893  | 299 | 0.179124832 | 0.000176992 |
| SNP_A.K_992730_6_5676591   | 6 | 5676591  | 3.96E-08 | 0.16054 | 299 | 0.179005494 | 0.000179771 |
| SNP_A.K_978697_6_1766020   | 6 | 1766020  | 4.00E-08 | 0.2893  | 299 | 0.178937576 | 0.000181203 |
| SNP_A.K_994381_6_5854407   | 6 | 5854407  | 4.08E-08 | 0.12709 | 299 | 0.17879303  | 0.000184743 |
| SNP_A.K_999265_6_6275495   | 6 | 6275495  | 4.11E-08 | 0.11538 | 299 | 0.178743394 | 0.00018571  |
| SNP_A.K_997414_6_6098080   | 6 | 6098080  | 4.14E-08 | 0.1204  | 299 | 0.178702085 | 0.000186452 |
| SNP_A.K_306805_2_7352465   | 2 | 7352465  | 4.22E-08 | 0.23579 | 299 | 0.178566344 | 0.000189849 |
| SNP_A.K_990608_6_4728236   | 6 | 4728236  | 4.51E-08 | 0.13043 | 299 | 0.178118049 | 0.000202527 |
| SNP_A.K_993344_6_5740379   | 6 | 5740379  | 4.56E-08 | 0.11037 | 299 | 0.178047778 | 0.000203781 |
| SNP_A.K_993215_6_5720734   | 6 | 5720734  | 4.56E-08 | 0.11037 | 299 | 0.178047778 | 0.000203781 |
| SNP_A.K_307280_2_7391076   | 2 | 7391076  | 4.59E-08 | 0.24749 | 299 | 0.178011149 | 0.000204295 |
| SNP_A.K_1005278_6_7002095  | 6 | 7002095  | 4.59E-08 | 0.23244 | 299 | 0.178002163 | 0.000204295 |
| SNP_A.K_993244_6_5723647   | 6 | 5723647  | 4.73E-08 | 0.11706 | 299 | 0.177812056 | 0.00020972  |
| SNP_A.K_1005225_6_6995275  | 6 | 6995275  | 4.82E-08 | 0.29766 | 299 | 0.177674323 | 0.000213617 |
| SNP_A.K_993527_6_5768225   | 6 | 5768225  | 4.86E-08 | 0.12709 | 299 | 0.177626505 | 0.000214689 |
| SNP_A.K_709527_4_8271604   | 4 | 8271604  | 4.97E-08 | 0.08863 | 299 | 0.177478561 | 0.000219014 |
| SNP_A.K_999709_6_6308568   | 6 | 6308568  | 5.00E-08 | 0.13545 | 299 | 0.177426978 | 0.000220239 |
| SNP_A.K_326867_2_10062054  | 2 | 10062054 | 5.18E-08 | 0.06187 | 299 | 0.177194607 | 0.000227528 |
| SNP_A.K_995752_6_5949795   | 6 | 5949795  | 5.31E-08 | 0.10535 | 299 | 0.177035522 | 0.000232504 |
| SNP_A.K_993626_6_5780312   | 6 | 5780312  | 5.58E-08 | 0.20736 | 299 | 0.176698865 | 0.000243975 |
| SNP_A.K_995615_6_5943431   | 6 | 5943431  | 5.83E-08 | 0.12207 | 299 | 0.176409103 | 0.000254231 |
| SNP_A.K_1005324_6_7006068  | 6 | 7006068  | 5.90E-08 | 0.29431 | 299 | 0.176319941 | 0.000257101 |
| SNP_A.K_992618_6_5665456   | 6 | 5665456  | 5.93E-08 | 0.11037 | 299 | 0.176289665 | 0.000257727 |
| SNP_A.K_1005960_6_7056095  | 6 | 7056095  | 6.07E-08 | 0.13712 | 299 | 0.176134696 | 0.000263215 |
| SNP_A.K_1004664_6_6914441  | 6 | 6914441  | 6.09E-08 | 0.28595 | 299 | 0.176113147 | 0.000263515 |
| SNP_A.K_1004361_6_6876125  | 6 | 6876125  | 6.10E-08 | 0.31271 | 299 | 0.176097928 | 0.000263567 |
| SNP_A.K_992518_6_5654573   | 6 | 5654573  | 6.14E-08 | 0.12709 | 299 | 0.176060872 | 0.000264482 |
| SNP_A.K_1004855_6_6936396  | 6 | 6936396  | 6.21E-08 | 0.28428 | 299 | 0.175981619 | 0.00026708  |
| SNP_A.K_978737_6_1772653   | 6 | 1772653  | 6.32E-08 | 0.3311  | 299 | 0.175864054 | 0.000271254 |
| SNP_A.K_992862_6_5682324   | 6 | 5682324  | 6.62E-08 | 0.18395 | 299 | 0.175557694 | 0.000283383 |
| SNP_A.K_1004786_6_6931701  | 6 | 6931701  | 6.71E-08 | 0.2893  | 299 | 0.175464633 | 0.000286765 |
| SNP_A.K_306866_2_7361495   | 2 | 7361495  | 6.77E-08 | 0.2709  | 299 | 0.17540827  | 0.000288483 |
| SNP_A.K_998780_6_6221178   | 6 | 6221178  | 6.78E-08 | 0.1505  | 299 | 0.175397283 | 0.000288483 |
| SNP_A.K_992619_6_5665847   | 6 | 5665847  | 7.02E-08 | 0.11204 | 299 | 0.175165347 | 0.000298059 |
| SNP_A.K_978802_6_1782689   | 6 | 1782689  | 7.03E-08 | 0.31104 | 299 | 0.175147792 | 0.000298187 |
| SNP_A.K_1005487_6_7016760  | 6 | 7016760  | 7.05E-08 | 0.29766 | 299 | 0.175134241 | 0.000298187 |
| SNP_A.K_1004360_6_6876114  | 6 | 6876114  | 7.06E-08 | 0.31438 | 299 | 0.175121683 | 0.000298187 |
| SNP_A.K_306734_2_7346476   | 2 | 7346476  | 7.09E-08 | 0.24749 | 299 | 0.175093512 | 0.00029884  |
| SNP_A.K_995321_6_5926034   | 6 | 5926034  | 7.23E-08 | 0.13378 | 299 | 0.174968728 | 0.000303218 |

|                             |    |          |          |         |     |             |             |
|-----------------------------|----|----------|----------|---------|-----|-------------|-------------|
| SNP_A.K_1004572_6_6907904   | 6  | 6907904  | 7.24E-08 | 0.29431 | 299 | 0.174959146 | 0.000303218 |
| SNP_A.K_1005314_6_7005301   | 6  | 7005301  | 7.24E-08 | 0.29264 | 299 | 0.174955859 | 0.000303218 |
| SNP_A.K_993576_6_5774842    | 6  | 5774842  | 7.34E-08 | 0.11371 | 299 | 0.174862718 | 0.000305821 |
| SNP_A.K_689897_4_4325774    | 4  | 4325774  | 7.35E-08 | 0.06355 | 299 | 0.174854845 | 0.000305821 |
| SNP_A.K_1364734_8_6038740   | 8  | 6038740  | 7.36E-08 | 0.03344 | 299 | 0.174847114 | 0.000305821 |
| SNP_A.K_306703_2_7342236    | 2  | 7342236  | 7.36E-08 | 0.23244 | 299 | 0.174845191 | 0.000305821 |
| SNP_A.K_1005454_6_7014355   | 6  | 7014355  | 7.42E-08 | 0.23579 | 299 | 0.174793855 | 0.000307566 |
| SNP_A.K_992580_6_5659658    | 6  | 5659658  | 7.49E-08 | 0.13545 | 299 | 0.174731433 | 0.000309836 |
| SNP_A.K_994371_6_5853160    | 6  | 5853160  | 7.55E-08 | 0.16722 | 299 | 0.174672812 | 0.000311698 |
| SNP_A.K_978579_6_1731808    | 6  | 1731808  | 7.57E-08 | 0.1388  | 299 | 0.174657347 | 0.000311698 |
| SNP_A.K_978695_6_1765448    | 6  | 1765448  | 7.58E-08 | 0.28094 | 299 | 0.174647045 | 0.000311698 |
| SNP_A.K_328725_2_10296603   | 2  | 10296603 | 7.59E-08 | 0.01505 | 299 | 0.174638512 | 0.000311698 |
| SNP_A.K_978710_6_1769240    | 6  | 1769240  | 7.75E-08 | 0.2893  | 299 | 0.17450448  | 0.00031739  |
| SNP_A.K_978734_6_1771928    | 6  | 1771928  | 7.80E-08 | 0.29933 | 299 | 0.174460367 | 0.000318866 |
| SNP_A.K_978793_6_1782083    | 6  | 1782083  | 7.85E-08 | 0.29933 | 299 | 0.17441119  | 0.000320593 |
| SNP_A.K_1830658_11_10573017 | 11 | 10573017 | 8.00E-08 | 0.17057 | 299 | 0.174288071 | 0.000325921 |
| SNP_A.K_307396_2_7400989    | 2  | 7400989  | 8.03E-08 | 0.24749 | 299 | 0.174264499 | 0.000326435 |
| SNP_A.K_326232_2_9986971    | 2  | 9986971  | 8.11E-08 | 0.03512 | 299 | 0.174199947 | 0.000328964 |
| SNP_A.K_306784_2_7350447    | 2  | 7350447  | 8.14E-08 | 0.23244 | 299 | 0.174174113 | 0.000329205 |
| SNP_A.K_993168_6_5711650    | 6  | 5711650  | 8.15E-08 | 0.12375 | 299 | 0.17416909  | 0.000329205 |
| SNP_A.K_993539_6_5769872    | 6  | 5769872  | 8.18E-08 | 0.11538 | 299 | 0.17414167  | 0.000329919 |
| SNP_A.K_1364944_8_6061267   | 8  | 6061267  | 8.42E-08 | 0.0903  | 299 | 0.173944625 | 0.000339147 |
| SNP_A.K_2065457_12_24399968 | 12 | 24399968 | 8.52E-08 | 0.02843 | 299 | 0.173871627 | 0.000342216 |
| SNP_A.K_978709_6_1769228    | 6  | 1769228  | 8.68E-08 | 0.28763 | 299 | 0.173743293 | 0.00034819  |
| SNP_A.K_992610_6_5665025    | 6  | 5665025  | 8.75E-08 | 0.11706 | 299 | 0.173694784 | 0.000348736 |
| SNP_A.K_1005888_6_7050492   | 6  | 7050492  | 8.75E-08 | 0.29264 | 299 | 0.173689182 | 0.000348736 |
| SNP_A.K_1433089_8_16617204  | 8  | 16617204 | 8.76E-08 | 0.08194 | 299 | 0.173686433 | 0.000348736 |
| SNP_A.K_996705_6_6017667    | 6  | 6017667  | 8.76E-08 | 0.10535 | 299 | 0.173681614 | 0.000348736 |
| SNP_A.K_994225_6_5827427    | 6  | 5827427  | 8.96E-08 | 0.12542 | 299 | 0.173532456 | 0.000355942 |
| SNP_A.K_992555_6_5657280    | 6  | 5657280  | 9.12E-08 | 0.1087  | 299 | 0.173411532 | 0.000361764 |
| SNP_A.K_1005223_6_6995207   | 6  | 6995207  | 9.25E-08 | 0.24247 | 299 | 0.173318839 | 0.00036613  |
| SNP_A.K_1599650_9_18583384  | 9  | 18583384 | 9.85E-08 | 0.03512 | 299 | 0.172903898 | 0.000388905 |
| SNP_A.K_995337_6_5926466    | 6  | 5926466  | 9.89E-08 | 0.13043 | 299 | 0.172871442 | 0.000390064 |
| SNP_A.K_527484_3_11137587   | 3  | 11137587 | 9.92E-08 | 0.01505 | 299 | 0.172853875 | 0.000390354 |
| SNP_A.K_998787_6_6222371    | 6  | 6222371  | 1.00E-07 | 0.18729 | 299 | 0.172781402 | 0.000393878 |
| SNP_A.K_992918_6_5684604    | 6  | 5684604  | 1.01E-07 | 0.1204  | 299 | 0.172735009 | 0.000395883 |
| SNP_A.K_1005321_6_7005868   | 6  | 7005868  | 1.01E-07 | 0.29431 | 299 | 0.172720675 | 0.00039599  |
| SNP_A.K_1371634_8_7860560   | 8  | 7860560  | 1.02E-07 | 0.00836 | 299 | 0.172655472 | 0.0003969   |
| SNP_A.K_1371474_8_7834834   | 8  | 7834834  | 1.02E-07 | 0.00836 | 299 | 0.172655472 | 0.0003969   |
| SNP_A.K_1371480_8_7835417   | 8  | 7835417  | 1.02E-07 | 0.00836 | 299 | 0.172655472 | 0.0003969   |
| SNP_A.K_1371699_8_7875943   | 8  | 7875943  | 1.02E-07 | 0.00836 | 299 | 0.172655472 | 0.0003969   |
| SNP_A.K_325759_2_9938123    | 2  | 9938123  | 1.05E-07 | 0.03177 | 299 | 0.172504387 | 0.000405249 |
| SNP_A.K_689896_4_4325625    | 4  | 4325625  | 1.05E-07 | 0.05686 | 299 | 0.172456224 | 0.000407431 |
| SNP_A.K_998160_6_6180544    | 6  | 6180544  | 1.07E-07 | 0.11371 | 299 | 0.172372211 | 0.00041114  |
| SNP_A.K_1005917_6_7052407   | 6  | 7052407  | 1.07E-07 | 0.27592 | 299 | 0.172371161 | 0.00041114  |
| SNP_A.K_1002499_6_6577922   | 6  | 6577922  | 1.08E-07 | 0.26923 | 299 | 0.172266245 | 0.000416324 |
| SNP_A.K_306697_2_7341888    | 2  | 7341888  | 1.08E-07 | 0.23746 | 299 | 0.172263103 | 0.000416324 |
| SNP_A.K_1005228_6_6995640   | 6  | 6995640  | 1.09E-07 | 0.29431 | 299 | 0.172246642 | 0.000416586 |
| SNP_A.K_992525_6_5654784    | 6  | 5654784  | 1.09E-07 | 0.11873 | 299 | 0.172219586 | 0.000417513 |
| SNP_A.K_1599597_9_18566375  | 9  | 18566375 | 1.10E-07 | 0.03846 | 299 | 0.172193794 | 0.000418364 |

|                             |    |          |          |         |     |             |             |
|-----------------------------|----|----------|----------|---------|-----|-------------|-------------|
| SNP_A.K_1364620_8_6029630   | 8  | 6029630  | 1.12E-07 | 0.09699 | 299 | 0.172066177 | 0.00042568  |
| SNP_A.K_993255_6_5724648    | 6  | 5724648  | 1.14E-07 | 0.11538 | 299 | 0.171914853 | 0.000434672 |
| SNP_A.K_942621_5_23062718   | 5  | 23062718 | 1.16E-07 | 0.21237 | 299 | 0.171835138 | 0.000439107 |
| SNP_A.K_328090_2_10197112   | 2  | 10197112 | 1.19E-07 | 0.01839 | 299 | 0.171645283 | 0.000450993 |
| SNP_A.K_673004_4_309896     | 4  | 309896   | 1.20E-07 | 0.04515 | 299 | 0.17156287  | 0.000455568 |
| SNP_A.K_997267_6_6079334    | 6  | 6079334  | 1.21E-07 | 0.15217 | 299 | 0.17155297  | 0.000455568 |
| SNP_A.K_1005633_6_7031828   | 6  | 7031828  | 1.21E-07 | 0.25251 | 299 | 0.171541871 | 0.000455568 |
| SNP_A.K_992886_6_5683022    | 6  | 5683022  | 1.22E-07 | 0.14047 | 299 | 0.171469752 | 0.00045949  |
| SNP_A.K_1005305_6_7003993   | 6  | 7003993  | 1.22E-07 | 0.27258 | 299 | 0.171460788 | 0.00045949  |
| SNP_A.K_978883_6_1794663    | 6  | 1794663  | 1.23E-07 | 0.30769 | 299 | 0.171417764 | 0.000461111 |
| SNP_A.K_977878_6_1608328    | 6  | 1608328  | 1.23E-07 | 0.15552 | 299 | 0.171413392 | 0.000461111 |
| SNP_A.K_993526_6_5768081    | 6  | 5768081  | 1.24E-07 | 0.11873 | 299 | 0.171391947 | 0.000461595 |
| SNP_A.K_993500_6_5759546    | 6  | 5759546  | 1.24E-07 | 0.11538 | 299 | 0.171382537 | 0.000461595 |
| SNP_A.K_992601_6_5664690    | 6  | 5664690  | 1.28E-07 | 0.11873 | 299 | 0.171166887 | 0.000475956 |
| SNP_A.K_997745_6_6145263    | 6  | 6145263  | 1.29E-07 | 0.14883 | 299 | 0.171119206 | 0.000478401 |
| SNP_A.K_2061896_12_23689543 | 12 | 23689543 | 1.29E-07 | 0.0301  | 299 | 0.171109073 | 0.000478401 |
| SNP_A.K_1005337_6_7007779   | 6  | 7007779  | 1.33E-07 | 0.301   | 299 | 0.170911273 | 0.000491972 |
| SNP_A.K_995316_6_5925953    | 6  | 5925953  | 1.36E-07 | 0.12876 | 299 | 0.170776814 | 0.000501134 |
| SNP_A.K_1004651_6_6913618   | 6  | 6913618  | 1.42E-07 | 0.31271 | 299 | 0.170477105 | 0.000523327 |
| SNP_A.K_1004658_6_6913983   | 6  | 6913983  | 1.43E-07 | 0.29264 | 299 | 0.170400037 | 0.000528496 |
| SNP_A.K_993885_6_5799259    | 6  | 5799259  | 1.44E-07 | 0.19732 | 299 | 0.170380358 | 0.000529128 |
| SNP_A.K_999650_6_6302785    | 6  | 6302785  | 1.50E-07 | 0.13043 | 299 | 0.170083734 | 0.000552321 |
| SNP_A.K_978775_6_1779985    | 6  | 1779985  | 1.51E-07 | 0.29766 | 299 | 0.170054341 | 0.000553314 |
| SNP_A.K_1005462_6_7015065   | 6  | 7015065  | 1.51E-07 | 0.27759 | 299 | 0.170048428 | 0.000553314 |
| SNP_A.K_1364942_8_6061118   | 8  | 6061118  | 1.52E-07 | 0.09532 | 299 | 0.170002599 | 0.00055523  |
| SNP_A.K_995211_6_5920302    | 6  | 5920302  | 1.52E-07 | 0.12375 | 299 | 0.170002181 | 0.00055523  |
| SNP_A.K_992494_6_5652924    | 6  | 5652924  | 1.60E-07 | 0.11706 | 299 | 0.169695498 | 0.000580469 |
| SNP_A.K_998161_6_6180565    | 6  | 6180565  | 1.60E-07 | 0.11037 | 299 | 0.169673965 | 0.000581339 |
| SNP_A.K_710548_4_8426976    | 4  | 8426976  | 1.63E-07 | 0.10033 | 299 | 0.169570014 | 0.000588892 |
| SNP_A.K_999662_6_6303577    | 6  | 6303577  | 1.63E-07 | 0.18395 | 299 | 0.169565194 | 0.000588892 |
| SNP_A.K_1364826_8_6046066   | 8  | 6046066  | 1.64E-07 | 0.09197 | 299 | 0.169523888 | 0.000590712 |
| SNP_A.K_997633_6_6139999    | 6  | 6139999  | 1.64E-07 | 0.11538 | 299 | 0.169521677 | 0.000590712 |
| SNP_A.K_1364970_8_6062391   | 8  | 6062391  | 1.64E-07 | 0.0903  | 299 | 0.169509918 | 0.000590736 |
| SNP_A.K_992874_6_5682720    | 6  | 5682720  | 1.65E-07 | 0.11371 | 299 | 0.169484316 | 0.000591996 |
| SNP_A.K_978751_6_1775037    | 6  | 1775037  | 1.65E-07 | 0.37793 | 299 | 0.169457393 | 0.000592012 |
| SNP_A.K_978718_6_1771148    | 6  | 1771148  | 1.66E-07 | 0.37458 | 299 | 0.169450414 | 0.000592012 |
| SNP_A.K_1390018_8_10145436  | 8  | 10145436 | 1.66E-07 | 0.04849 | 299 | 0.169449851 | 0.000592012 |
| SNP_A.K_1005908_6_7051226   | 6  | 7051226  | 1.67E-07 | 0.301   | 299 | 0.169406036 | 0.000594912 |
| SNP_A.K_978794_6_1782121    | 6  | 1782121  | 1.68E-07 | 0.30268 | 299 | 0.169352739 | 0.000598685 |
| SNP_A.K_1005446_6_7014242   | 6  | 7014242  | 1.68E-07 | 0.28094 | 299 | 0.169340185 | 0.000598793 |
| SNP_A.K_908233_5_17491226   | 5  | 17491226 | 1.69E-07 | 0.02341 | 299 | 0.169320745 | 0.000599526 |
| SNP_A.K_1005709_6_7034809   | 6  | 7034809  | 1.70E-07 | 0.24582 | 299 | 0.169279755 | 0.000602215 |
| SNP_A.K_993384_6_5744658    | 6  | 5744658  | 1.71E-07 | 0.12876 | 299 | 0.169238589 | 0.000603698 |
| SNP_A.K_978672_6_1755397    | 6  | 1755397  | 1.71E-07 | 0.27759 | 299 | 0.169236122 | 0.000603698 |
| SNP_A.K_998243_6_6186002    | 6  | 6186002  | 1.71E-07 | 0.13378 | 299 | 0.169227596 | 0.000603698 |
| SNP_A.K_1608644_9_20809208  | 9  | 20809208 | 1.71E-07 | 0.24916 | 299 | 0.169218399 | 0.000603698 |
| SNP_A.K_978719_6_1771154    | 6  | 1771154  | 1.75E-07 | 0.36455 | 299 | 0.169081588 | 0.000615241 |
| SNP_A.K_1004609_6_6910110   | 6  | 6910110  | 1.75E-07 | 0.29264 | 299 | 0.169062743 | 0.000615951 |
| SNP_A.K_1364831_8_6047477   | 8  | 6047477  | 1.81E-07 | 0.09699 | 299 | 0.16885224  | 0.000634751 |
| SNP_A.K_993141_6_5710490    | 6  | 5710490  | 1.83E-07 | 0.11706 | 299 | 0.168801329 | 0.00063857  |

|                             |    |          |          |         |     |             |             |
|-----------------------------|----|----------|----------|---------|-----|-------------|-------------|
| SNP_A.K_900798_5_16220448   | 5  | 16220448 | 1.83E-07 | 0.03679 | 299 | 0.168787267 | 0.000638853 |
| SNP_A.K_1004610_6_6910145   | 6  | 6910145  | 1.91E-07 | 0.29599 | 299 | 0.16849374  | 0.000666666 |
| SNP_A.K_1005916_6_7051934   | 6  | 7051934  | 1.95E-07 | 0.27592 | 299 | 0.168365648 | 0.000678544 |
| SNP_A.K_978671_6_1755368    | 6  | 1755368  | 1.97E-07 | 0.27759 | 299 | 0.16829238  | 0.000683242 |
| SNP_A.K_978704_6_1769141    | 6  | 1769141  | 1.97E-07 | 0.28595 | 299 | 0.168288717 | 0.000683242 |
| SNP_A.K_990584_6_4726929    | 6  | 4726929  | 1.97E-07 | 0.1204  | 299 | 0.168286794 | 0.000683242 |
| SNP_A.K_978670_6_1754821    | 6  | 1754821  | 1.99E-07 | 0.27425 | 299 | 0.168241744 | 0.000686762 |
| SNP_A.K_2080315_12_27256354 | 12 | 27256354 | 2.00E-07 | 0.00836 | 299 | 0.168202268 | 0.00068858  |
| SNP_A.K_2080229_12_27246573 | 12 | 27246573 | 2.00E-07 | 0.00836 | 299 | 0.168202268 | 0.00068858  |
| SNP_A.K_978783_6_1780336    | 6  | 1780336  | 2.01E-07 | 0.29933 | 299 | 0.168168354 | 0.000690971 |
| SNP_A.K_1363959_8_5860969   | 8  | 5860969  | 2.02E-07 | 0.01171 | 299 | 0.168146251 | 0.000692137 |
| SNP_A.K_998198_6_6184151    | 6  | 6184151  | 2.03E-07 | 0.13043 | 299 | 0.168108828 | 0.000694912 |
| SNP_A.K_1364838_8_6048202   | 8  | 6048202  | 2.04E-07 | 0.09197 | 299 | 0.168078108 | 0.000696995 |
| SNP_A.K_999539_6_6295100    | 6  | 6295100  | 2.09E-07 | 0.0786  | 299 | 0.167903841 | 0.000714408 |
| SNP_A.K_992521_6_5654624    | 6  | 5654624  | 2.09E-07 | 0.11706 | 299 | 0.167891463 | 0.000714571 |
| SNP_A.K_177897_1_28607327   | 1  | 28607327 | 2.10E-07 | 0.02341 | 299 | 0.167857368 | 0.000716945 |
| SNP_A.K_992471_6_5652099    | 6  | 5652099  | 2.11E-07 | 0.11706 | 299 | 0.167843818 | 0.000716945 |
| SNP_A.K_1005453_6_7014335   | 6  | 7014335  | 2.11E-07 | 0.27759 | 299 | 0.167837028 | 0.000716945 |
| SNP_A.K_306938_2_7369542    | 2  | 7369542  | 2.13E-07 | 0.21405 | 299 | 0.167789125 | 0.000720976 |
| SNP_A.K_307253_2_7388054    | 2  | 7388054  | 2.17E-07 | 0.24582 | 299 | 0.167654212 | 0.000734626 |
| SNP_A.K_710484_4_8424476    | 4  | 8424476  | 2.21E-07 | 0.07023 | 299 | 0.167540524 | 0.000745308 |
| SNP_A.K_992866_6_5682363    | 6  | 5682363  | 2.21E-07 | 0.18227 | 299 | 0.16753719  | 0.000745308 |
| SNP_A.K_1001774_6_6519962   | 6  | 6519962  | 2.24E-07 | 0.12709 | 299 | 0.167459681 | 0.000752869 |
| SNP_A.K_20623_1_3101817     | 1  | 3101817  | 2.28E-07 | 0.00669 | 299 | 0.16732109  | 0.000767565 |
| SNP_A.K_978784_6_1780935    | 6  | 1780935  | 2.31E-07 | 0.29097 | 299 | 0.167234651 | 0.000776406 |
| SNP_A.K_978701_6_1766460    | 6  | 1766460  | 2.32E-07 | 0.29431 | 299 | 0.167220169 | 0.000776855 |
| SNP_A.K_1608572_9_20787173  | 9  | 20787173 | 2.32E-07 | 0.23579 | 299 | 0.16720584  | 0.000777288 |
| SNP_A.K_171097_1_27544195   | 1  | 27544195 | 2.34E-07 | 0.02341 | 299 | 0.167163773 | 0.000780991 |
| SNP_A.K_307259_2_7388426    | 2  | 7388426  | 2.35E-07 | 0.2291  | 299 | 0.167126463 | 0.000784151 |
| SNP_A.K_992515_6_5654540    | 6  | 5654540  | 2.37E-07 | 0.12375 | 299 | 0.167058921 | 0.000790933 |
| SNP_A.K_978879_6_1794224    | 6  | 1794224  | 2.38E-07 | 0.30435 | 299 | 0.167034528 | 0.000792588 |
| SNP_A.K_1004393_6_6879131   | 6  | 6879131  | 2.39E-07 | 0.31271 | 299 | 0.167013556 | 0.000793837 |
| SNP_A.K_995255_6_5921567    | 6  | 5921567  | 2.40E-07 | 0.12542 | 299 | 0.166997673 | 0.000794479 |
| SNP_A.K_1005420_6_7013177   | 6  | 7013177  | 2.45E-07 | 0.30769 | 299 | 0.166861037 | 0.000809778 |
| SNP_A.K_978694_6_1765415    | 6  | 1765415  | 2.46E-07 | 0.27926 | 299 | 0.166836303 | 0.000811523 |
| SNP_A.K_1005912_6_7051414   | 6  | 7051414  | 2.60E-07 | 0.27926 | 299 | 0.166459675 | 0.000857748 |
| SNP_A.K_999314_6_6280780    | 6  | 6280780  | 2.62E-07 | 0.1388  | 299 | 0.166400297 | 0.000864122 |
| SNP_A.K_1005315_6_7005314   | 6  | 7005314  | 2.64E-07 | 0.25418 | 299 | 0.166357371 | 0.00086838  |
| SNP_A.K_1371330_8_7820516   | 8  | 7820516  | 2.65E-07 | 0.01672 | 299 | 0.16634379  | 0.000868795 |
| SNP_A.K_1004703_6_6921594   | 6  | 6921594  | 2.65E-07 | 0.27759 | 299 | 0.166326029 | 0.000869762 |
| SNP_A.K_1005500_6_7017178   | 6  | 7017178  | 2.69E-07 | 0.28595 | 299 | 0.166243626 | 0.000879294 |
| SNP_A.K_978950_6_1823332    | 6  | 1823332  | 2.71E-07 | 0.29264 | 299 | 0.166178652 | 0.000886592 |
| SNP_A.K_1005452_6_7014333   | 6  | 7014333  | 2.74E-07 | 0.23077 | 299 | 0.166109551 | 0.000894512 |
| SNP_A.K_307238_2_7387182    | 2  | 7387182  | 2.76E-07 | 0.23579 | 299 | 0.166063992 | 0.000899294 |
| SNP_A.K_993843_6_5796435    | 6  | 5796435  | 2.82E-07 | 0.1505  | 299 | 0.165929751 | 0.000916328 |
| SNP_A.K_306702_2_7342222    | 2  | 7342222  | 2.83E-07 | 0.23579 | 299 | 0.165908851 | 0.000917799 |
| SNP_A.K_1390048_8_10146895  | 8  | 10146895 | 2.84E-07 | 0.04849 | 299 | 0.165870405 | 0.00092154  |
| SNP_A.K_1371331_8_7820542   | 8  | 7820542  | 2.85E-07 | 0.01003 | 299 | 0.165858151 | 0.00092154  |
| SNP_A.K_1004359_6_6875866   | 6  | 6875866  | 2.85E-07 | 0.30435 | 299 | 0.165851162 | 0.00092154  |
| SNP_A.K_957685_5_26967577   | 5  | 26967577 | 2.87E-07 | 0.01839 | 299 | 0.165814958 | 0.000925171 |

|                           |   |         |          |         |     |             |             |
|---------------------------|---|---------|----------|---------|-----|-------------|-------------|
| SNP_A.K_1371276_8_7817486 | 8 | 7817486 | 2.90E-07 | 0.01003 | 299 | 0.165742608 | 0.000933918 |
| SNP_A.K_1005232_6_6996522 | 6 | 6996522 | 2.91E-07 | 0.28261 | 299 | 0.165725444 | 0.000934902 |
| SNP_A.K_306916_2_7366560  | 2 | 7366560 | 2.92E-07 | 0.27759 | 299 | 0.165693046 | 0.000937515 |
| SNP_A.K_993883_6_5798993  | 6 | 5798993 | 2.92E-07 | 0.18395 | 299 | 0.165686649 | 0.000937515 |
| SNP_A.K_1004381_6_6878013 | 6 | 6878013 | 2.93E-07 | 0.13043 | 299 | 0.165669693 | 0.000938481 |
| SNP_A.K_1005441_6_7014033 | 6 | 7014033 | 2.95E-07 | 0.27759 | 299 | 0.165634434 | 0.000942058 |
| SNP_A.K_11421_1_1955684   | 1 | 1955684 | 3.00E-07 | 0.00669 | 299 | 0.165510143 | 0.000958495 |
| SNP_A.K_1004857_6_6936530 | 6 | 6936530 | 3.02E-07 | 0.2893  | 299 | 0.165469217 | 0.000962981 |
| SNP_A.K_992968_6_5691334  | 6 | 5691334 | 3.03E-07 | 0.14047 | 299 | 0.165445584 | 0.000963727 |
| SNP_A.K_306809_2_7352848  | 2 | 7352848 | 3.03E-07 | 0.23244 | 299 | 0.165443925 | 0.000963727 |
| SNP_A.K_995301_6_5924436  | 6 | 5924436 | 3.08E-07 | 0.12709 | 299 | 0.165348489 | 0.000976277 |
| SNP_A.K_1005385_6_7011329 | 6 | 7011329 | 3.08E-07 | 0.31773 | 299 | 0.165331111 | 0.000977362 |
| SNP_A.K_1004681_6_6916783 | 6 | 6916783 | 3.10E-07 | 0.301   | 299 | 0.165300713 | 0.000980172 |
| SNP_A.K_995291_6_5924019  | 6 | 5924019 | 3.10E-07 | 0.1204  | 299 | 0.165292114 | 0.000980172 |
| SNP_A.K_306727_2_7345818  | 2 | 7345818 | 3.11E-07 | 0.23411 | 299 | 0.165277709 | 0.000980827 |
| SNP_A.K_1371551_8_7852154 | 8 | 7852154 | 3.12E-07 | 0.01672 | 299 | 0.165261865 | 0.000981698 |
| SNP_A.K_990242_6_4702841  | 6 | 4702841 | 3.13E-07 | 0.2107  | 299 | 0.165239198 | 0.000983589 |
| SNP_A.K_999632_6_6301340  | 6 | 6301340 | 3.15E-07 | 0.19064 | 299 | 0.165184594 | 0.000990268 |
| SNP_A.K_1004177_6_6841690 | 6 | 6841690 | 3.16E-07 | 0.30602 | 299 | 0.165166474 | 0.000991497 |
| SNP_A.K_1005521_6_7018974 | 6 | 7018974 | 3.18E-07 | 0.23579 | 299 | 0.165133822 | 0.000993735 |
| SNP_A.K_992875_6_5682759  | 6 | 5682759 | 3.18E-07 | 0.1806  | 299 | 0.165131765 | 0.000993735 |
| SNP_A.K_1005332_6_7007554 | 6 | 7007554 | 3.23E-07 | 0.23244 | 299 | 0.165028861 | 0.001006804 |
| SNP_A.K_995293_6_5924075  | 6 | 5924075 | 3.23E-07 | 0.12876 | 299 | 0.165025814 | 0.001006804 |
| SNP_A.K_994373_6_5853168  | 6 | 5853168 | 3.25E-07 | 0.16388 | 299 | 0.164992829 | 0.001009575 |
| SNP_A.K_999030_6_6249316  | 6 | 6249316 | 3.25E-07 | 0.14047 | 299 | 0.16498797  | 0.001009575 |
| SNP_A.K_993265_6_5728362  | 6 | 5728362 | 3.27E-07 | 0.15719 | 299 | 0.164951437 | 0.001013671 |
| SNP_A.K_307374_2_7399685  | 2 | 7399685 | 3.28E-07 | 0.27425 | 299 | 0.164917112 | 0.001017445 |
| SNP_A.K_977872_6_1606079  | 6 | 1606079 | 3.29E-07 | 0.15719 | 299 | 0.164902864 | 0.001018131 |
| SNP_A.K_1004580_6_6908543 | 6 | 6908543 | 3.30E-07 | 0.31271 | 299 | 0.164883364 | 0.001019631 |
| SNP_A.K_1005382_6_7011231 | 6 | 7011231 | 3.36E-07 | 0.29933 | 299 | 0.164776897 | 0.001034695 |
| SNP_A.K_1005240_6_6997398 | 6 | 6997398 | 3.42E-07 | 0.33278 | 299 | 0.16465339  | 0.001052374 |
| SNP_A.K_307501_2_7413253  | 2 | 7413253 | 3.42E-07 | 0.23411 | 299 | 0.164645708 | 0.001052374 |
| SNP_A.K_1364820_8_6044920 | 8 | 6044920 | 3.43E-07 | 0.10033 | 299 | 0.164626183 | 0.00105394  |
| SNP_A.K_307160_2_7382743  | 2 | 7382743 | 3.46E-07 | 0.24916 | 299 | 0.164572531 | 0.001060989 |
| SNP_A.K_992454_6_5647197  | 6 | 5647197 | 3.48E-07 | 0.1204  | 299 | 0.164545578 | 0.001062503 |
| SNP_A.K_1004376_6_6877683 | 6 | 6877683 | 3.48E-07 | 0.33612 | 299 | 0.164543745 | 0.001062503 |
| SNP_A.K_993135_6_5709995  | 6 | 5709995 | 3.50E-07 | 0.12542 | 299 | 0.16450324  | 0.001067486 |
| SNP_A.K_1005456_6_7014542 | 6 | 7014542 | 3.54E-07 | 0.23244 | 299 | 0.164420851 | 0.001079334 |
| SNP_A.K_998069_6_6168624  | 6 | 6168624 | 3.56E-07 | 0.13545 | 299 | 0.164386956 | 0.001083314 |
| SNP_A.K_308590_2_7528214  | 2 | 7528214 | 3.58E-07 | 0.22408 | 299 | 0.164353549 | 0.001085988 |
| SNP_A.K_978752_6_1775050  | 6 | 1775050 | 3.58E-07 | 0.38963 | 299 | 0.164351473 | 0.001085988 |
| SNP_A.K_1364347_8_5991929 | 8 | 5991929 | 3.60E-07 | 0.01338 | 299 | 0.164312981 | 0.00108932  |
| SNP_A.K_1371504_8_7850184 | 8 | 7850184 | 3.60E-07 | 0.01672 | 299 | 0.164312105 | 0.00108932  |
| SNP_A.K_1005624_6_7030797 | 6 | 7030797 | 3.62E-07 | 0.23579 | 299 | 0.164269363 | 0.001094501 |
| SNP_A.K_690092_4_4404200  | 4 | 4404200 | 3.63E-07 | 0.04181 | 299 | 0.164261723 | 0.001094501 |
| SNP_A.K_993446_6_5751798  | 6 | 5751798 | 3.64E-07 | 0.14047 | 299 | 0.164239191 | 0.001096661 |
| SNP_A.K_1004346_6_6870440 | 6 | 6870440 | 3.68E-07 | 0.33278 | 299 | 0.164170816 | 0.001106502 |
| SNP_A.K_1364823_8_6045314 | 8 | 6045314 | 3.68E-07 | 0.05853 | 299 | 0.164161153 | 0.001106527 |
| SNP_A.K_977883_6_1612527  | 6 | 1612527 | 3.70E-07 | 0.15719 | 299 | 0.164139612 | 0.001108552 |
| SNP_A.K_1005425_6_7013618 | 6 | 7013618 | 3.73E-07 | 0.23411 | 299 | 0.164071859 | 0.001118403 |

|                             |    |          |          |         |     |             |             |
|-----------------------------|----|----------|----------|---------|-----|-------------|-------------|
| SNP_A.K_978673_6_1755645    | 6  | 1755645  | 3.81E-07 | 0.28428 | 299 | 0.163932842 | 0.001139593 |
| SNP_A.K_307532_2_7416038    | 2  | 7416038  | 3.82E-07 | 0.25753 | 299 | 0.163916012 | 0.001139593 |
| SNP_A.K_1198049_7_7832352   | 7  | 7832352  | 3.83E-07 | 0.01003 | 299 | 0.163910453 | 0.001139593 |
| SNP_A.K_1198080_7_7835380   | 7  | 7835380  | 3.83E-07 | 0.01003 | 299 | 0.163910453 | 0.001139593 |
| SNP_A.K_1004248_6_6853504   | 6  | 6853504  | 3.85E-07 | 0.32776 | 299 | 0.163870077 | 0.001143346 |
| SNP_A.K_326878_2_10064484   | 2  | 10064484 | 3.87E-07 | 0.07692 | 299 | 0.163840379 | 0.001143346 |
| SNP_A.K_1005508_6_7017838   | 6  | 7017838  | 3.87E-07 | 0.29264 | 299 | 0.163832646 | 0.001143346 |
| SNP_A.K_1005534_6_7019948   | 6  | 7019948  | 3.88E-07 | 0.24247 | 299 | 0.163823653 | 0.001143346 |
| SNP_A.K_307373_2_7399672    | 2  | 7399672  | 3.88E-07 | 0.21906 | 299 | 0.163822687 | 0.001143346 |
| SNP_A.K_328406_2_10261897   | 2  | 10261897 | 3.88E-07 | 0.04515 | 299 | 0.163817515 | 0.001143346 |
| SNP_A.K_992675_6_5671488    | 6  | 5671488  | 3.88E-07 | 0.14381 | 299 | 0.163813823 | 0.001143346 |
| SNP_A.K_326815_2_10057242   | 2  | 10057242 | 3.88E-07 | 0.06187 | 299 | 0.163812931 | 0.001143346 |
| SNP_A.K_1004155_6_6839214   | 6  | 6839214  | 3.89E-07 | 0.31605 | 299 | 0.163804572 | 0.001143346 |
| SNP_A.K_307405_2_7401533    | 2  | 7401533  | 3.90E-07 | 0.2291  | 299 | 0.163788139 | 0.001144586 |
| SNP_A.K_978764_6_1777321    | 6  | 1777321  | 3.91E-07 | 0.3495  | 299 | 0.163760958 | 0.001147703 |
| SNP_A.K_1371561_8_7852947   | 8  | 7852947  | 3.95E-07 | 0.01672 | 299 | 0.163700689 | 0.001156536 |
| SNP_A.K_1177595_7_2163967   | 7  | 2163967  | 3.96E-07 | 0.03177 | 299 | 0.163691965 | 0.001156536 |
| SNP_A.K_306945_2_7370258    | 2  | 7370258  | 4.01E-07 | 0.25418 | 299 | 0.163608478 | 0.001169656 |
| SNP_A.K_598481_3_24171758   | 3  | 24171758 | 4.02E-07 | 0.02007 | 299 | 0.16358251  | 0.001172635 |
| SNP_A.K_997783_6_6146427    | 6  | 6146427  | 4.03E-07 | 0.14214 | 299 | 0.163569566 | 0.0011733   |
| SNP_A.K_1005326_6_7006104   | 6  | 7006104  | 4.13E-07 | 0.28763 | 299 | 0.163405281 | 0.001198277 |
| SNP_A.K_307155_2_7382512    | 2  | 7382512  | 4.13E-07 | 0.24749 | 299 | 0.163402846 | 0.001198277 |
| SNP_A.K_1004399_6_6879583   | 6  | 6879583  | 4.14E-07 | 0.3194  | 299 | 0.163400011 | 0.001198277 |
| SNP_A.K_978951_6_1824082    | 6  | 1824082  | 4.14E-07 | 0.29431 | 299 | 0.163394225 | 0.001198277 |
| SNP_A.K_1004784_6_6931492   | 6  | 6931492  | 4.15E-07 | 0.28763 | 299 | 0.163380536 | 0.001199105 |
| SNP_A.K_389592_2_19885939   | 2  | 19885939 | 4.18E-07 | 0.02174 | 299 | 0.163322028 | 0.001208137 |
| SNP_A.K_306802_2_7351931    | 2  | 7351931  | 4.20E-07 | 0.23579 | 299 | 0.163294583 | 0.001211436 |
| SNP_A.K_1599602_9_18568232  | 9  | 18568232 | 4.21E-07 | 0.04348 | 299 | 0.163279034 | 0.001211436 |
| SNP_A.K_1364863_8_6049881   | 8  | 6049881  | 4.21E-07 | 0.08528 | 299 | 0.163276767 | 0.001211436 |
| SNP_A.K_307291_2_7391466    | 2  | 7391466  | 4.25E-07 | 0.23411 | 299 | 0.163225257 | 0.001219163 |
| SNP_A.K_1004180_6_6841855   | 6  | 6841855  | 4.25E-07 | 0.301   | 299 | 0.163216788 | 0.001219163 |
| SNP_A.K_1608612_9_20794226  | 9  | 20794226 | 4.27E-07 | 0.2408  | 299 | 0.163192935 | 0.00122183  |
| SNP_A.K_1390025_8_10145506  | 8  | 10145506 | 4.27E-07 | 0.04181 | 299 | 0.163184315 | 0.00122183  |
| SNP_A.K_457035_2_33231713   | 2  | 33231713 | 4.30E-07 | 0.02174 | 299 | 0.16314821  | 0.00122687  |
| SNP_A.K_1005422_6_7013265   | 6  | 7013265  | 4.31E-07 | 0.28595 | 299 | 0.163127805 | 0.001228996 |
| SNP_A.K_1550014_9_8775809   | 9  | 8775809  | 4.33E-07 | 0.02676 | 299 | 0.16309988  | 0.001232536 |
| SNP_A.K_1004152_6_6838670   | 6  | 6838670  | 4.35E-07 | 0.301   | 299 | 0.163072902 | 0.001235911 |
| SNP_A.K_998923_6_6234753    | 6  | 6234753  | 4.37E-07 | 0.13712 | 299 | 0.163038835 | 0.001240634 |
| SNP_A.K_1004895_6_6949684   | 6  | 6949684  | 4.39E-07 | 0.2893  | 299 | 0.163004486 | 0.001245432 |
| SNP_A.K_978772_6_1779545    | 6  | 1779545  | 4.40E-07 | 0.29097 | 299 | 0.162992238 | 0.001246056 |
| SNP_A.K_1005190_6_6990453   | 6  | 6990453  | 4.42E-07 | 0.25753 | 299 | 0.162967559 | 0.001249041 |
| SNP_A.K_990240_6_4702808    | 6  | 4702808  | 4.47E-07 | 0.21405 | 299 | 0.162887462 | 0.001262632 |
| SNP_A.K_1004385_6_6878700   | 6  | 6878700  | 4.48E-07 | 0.33946 | 299 | 0.162867287 | 0.001264796 |
| SNP_A.K_307377_2_7399770    | 2  | 7399770  | 4.53E-07 | 0.23579 | 299 | 0.162800441 | 0.001275991 |
| SNP_A.K_307461_2_7408743    | 2  | 7408743  | 4.56E-07 | 0.23077 | 299 | 0.162757855 | 0.001279782 |
| SNP_A.K_1005516_6_7018255   | 6  | 7018255  | 4.56E-07 | 0.29097 | 299 | 0.162752796 | 0.001279782 |
| SNP_A.K_1860753_11_15381015 | 11 | 15381015 | 4.57E-07 | 0.11037 | 299 | 0.162747242 | 0.001279782 |
| SNP_A.K_1371528_8_7851013   | 8  | 7851013  | 4.57E-07 | 0.01672 | 299 | 0.162745446 | 0.001279782 |
| SNP_A.K_306723_2_7345357    | 2  | 7345357  | 4.58E-07 | 0.23077 | 299 | 0.162724586 | 0.001282124 |
| SNP_A.K_995313_6_5925376    | 6  | 5925376  | 4.60E-07 | 0.13545 | 299 | 0.162705333 | 0.001284158 |

|                            |   |          |          |         |     |             |             |
|----------------------------|---|----------|----------|---------|-----|-------------|-------------|
| SNP_A.K_306731_2_7346275   | 2 | 7346275  | 4.64E-07 | 0.23411 | 299 | 0.162641646 | 0.001294922 |
| SNP_A.K_1004079_6_6830286  | 6 | 6830286  | 4.75E-07 | 0.17057 | 299 | 0.162485675 | 0.001324243 |
| SNP_A.K_1364906_8_6054591  | 8 | 6054591  | 4.78E-07 | 0.08194 | 299 | 0.162446867 | 0.001330305 |
| SNP_A.K_307499_2_7413212   | 2 | 7413212  | 4.80E-07 | 0.2592  | 299 | 0.162426866 | 0.001332579 |
| SNP_A.K_1005694_6_7034225  | 6 | 7034225  | 4.83E-07 | 0.2709  | 299 | 0.162373592 | 0.001341635 |
| SNP_A.K_977907_6_1619620   | 6 | 1619620  | 4.84E-07 | 0.24582 | 299 | 0.162361395 | 0.001342338 |
| SNP_A.K_1004630_6_6912375  | 6 | 6912375  | 4.87E-07 | 0.2893  | 299 | 0.162321559 | 0.001348705 |
| SNP_A.K_1004861_6_6936730  | 6 | 6936730  | 4.90E-07 | 0.28595 | 299 | 0.162291159 | 0.00135316  |
| SNP_A.K_1364922_8_6057412  | 8 | 6057412  | 4.96E-07 | 0.0786  | 299 | 0.162205313 | 0.00136914  |
| SNP_A.K_978735_6_1772565   | 6 | 1772565  | 5.02E-07 | 0.31104 | 299 | 0.162130119 | 0.001383067 |
| SNP_A.K_978287_6_1669314   | 6 | 1669314  | 5.02E-07 | 0.1689  | 299 | 0.162119501 | 0.001383472 |
| SNP_A.K_1005208_6_6994515  | 6 | 6994515  | 5.05E-07 | 0.25251 | 299 | 0.162084781 | 0.001388967 |
| SNP_A.K_1390019_8_10145441 | 8 | 10145441 | 5.12E-07 | 0.05351 | 299 | 0.162002219 | 0.001404682 |
| SNP_A.K_997253_6_6061397   | 6 | 6061397  | 5.16E-07 | 0.06355 | 299 | 0.161939853 | 0.001416217 |
| SNP_A.K_1371604_8_7858316  | 8 | 7858316  | 5.18E-07 | 0.01003 | 299 | 0.161922168 | 0.001418168 |
| SNP_A.K_1003937_6_6807270  | 6 | 6807270  | 5.20E-07 | 0.301   | 299 | 0.161894009 | 0.001421663 |
| SNP_A.K_1608747_9_20829580 | 9 | 20829580 | 5.20E-07 | 0.24582 | 299 | 0.161888746 | 0.001421663 |
| SNP_A.K_992519_6_5654597   | 6 | 5654597  | 5.24E-07 | 0.11538 | 299 | 0.161842113 | 0.001429918 |
| SNP_A.K_995323_6_5926047   | 6 | 5926047  | 5.29E-07 | 0.21237 | 299 | 0.161785134 | 0.001440101 |
| SNP_A.K_978821_6_1784985   | 6 | 1784985  | 5.29E-07 | 0.301   | 299 | 0.161778334 | 0.001440101 |
| SNP_A.K_978803_6_1782840   | 6 | 1782840  | 5.37E-07 | 0.32107 | 299 | 0.161683297 | 0.001457286 |
| SNP_A.K_1000323_6_6374634  | 6 | 6374634  | 5.37E-07 | 0.10033 | 299 | 0.16168145  | 0.001457286 |
| SNP_A.K_1004036_6_6820916  | 6 | 6820916  | 5.38E-07 | 0.17224 | 299 | 0.161674762 | 0.001457286 |
| SNP_A.K_1005739_6_7036720  | 6 | 7036720  | 5.38E-07 | 0.23579 | 299 | 0.161664855 | 0.001457589 |
| SNP_A.K_1005004_6_6961307  | 6 | 6961307  | 5.41E-07 | 0.31605 | 299 | 0.161631715 | 0.001463064 |
| SNP_A.K_306994_2_7372249   | 2 | 7372249  | 5.45E-07 | 0.23411 | 299 | 0.161583618 | 0.001471912 |
| SNP_A.K_998978_6_6243940   | 6 | 6243940  | 5.47E-07 | 0.14214 | 299 | 0.161567123 | 0.001473705 |
| SNP_A.K_995328_6_5926145   | 6 | 5926145  | 5.50E-07 | 0.13043 | 299 | 0.161520386 | 0.001480714 |
| SNP_A.K_978799_6_1782431   | 6 | 1782431  | 5.51E-07 | 0.29933 | 299 | 0.161518997 | 0.001480714 |
| SNP_A.K_995248_6_5921315   | 6 | 5921315  | 5.53E-07 | 0.12207 | 299 | 0.16148686  | 0.001486063 |
| SNP_A.K_999629_6_6301310   | 6 | 6301310  | 5.56E-07 | 0.19398 | 299 | 0.161450882 | 0.00149014  |
| SNP_A.K_1004558_6_6901563  | 6 | 6901563  | 5.57E-07 | 0.2893  | 299 | 0.161448398 | 0.00149014  |
| SNP_A.K_978801_6_1782622   | 6 | 1782622  | 5.57E-07 | 0.29264 | 299 | 0.161441265 | 0.00149014  |
| SNP_A.K_1005038_6_6964239  | 6 | 6964239  | 5.58E-07 | 0.30268 | 299 | 0.161435094 | 0.00149014  |
| SNP_A.K_1004064_6_6823164  | 6 | 6823164  | 5.60E-07 | 0.30268 | 299 | 0.161412149 | 0.001493443 |
| SNP_A.K_1019370_6_9054292  | 6 | 9054292  | 5.62E-07 | 0.03344 | 299 | 0.161380418 | 0.00149876  |
| SNP_A.K_1009020_6_7457588  | 6 | 7457588  | 5.63E-07 | 0.07191 | 299 | 0.161370722 | 0.001499057 |
| SNP_A.K_993014_6_5698223   | 6 | 5698223  | 5.64E-07 | 0.19398 | 299 | 0.161355959 | 0.001500019 |
| SNP_A.K_1004398_6_6879577  | 6 | 6879577  | 5.65E-07 | 0.32107 | 299 | 0.161349754 | 0.001500019 |
| SNP_A.K_1005229_6_6995700  | 6 | 6995700  | 5.70E-07 | 0.29097 | 299 | 0.161288212 | 0.001512225 |
| SNP_A.K_978872_6_1793712   | 6 | 1793712  | 5.76E-07 | 0.32274 | 299 | 0.161220238 | 0.001523984 |
| SNP_A.K_978698_6_1766071   | 6 | 1766071  | 5.76E-07 | 0.30268 | 299 | 0.161219728 | 0.001523984 |
| SNP_A.K_1371525_8_7850968  | 8 | 7850968  | 5.77E-07 | 0.01672 | 299 | 0.16121237  | 0.001523984 |
| SNP_A.K_993841_6_5796393   | 6 | 5796393  | 5.82E-07 | 0.15217 | 299 | 0.16115914  | 0.001534453 |
| SNP_A.K_1004560_6_6904714  | 6 | 6904714  | 5.88E-07 | 0.30769 | 299 | 0.161085966 | 0.00154879  |
| SNP_A.K_1004751_6_6927221  | 6 | 6927221  | 5.89E-07 | 0.28261 | 299 | 0.161073741 | 0.00154879  |
| SNP_A.K_978768_6_1777747   | 6 | 1777747  | 5.89E-07 | 0.29933 | 299 | 0.161073247 | 0.00154879  |
| SNP_A.K_1504576_9_1146041  | 9 | 1146041  | 5.95E-07 | 0.04515 | 299 | 0.161012933 | 0.001561127 |
| SNP_A.K_1004888_6_6949456  | 6 | 6949456  | 6.02E-07 | 0.31104 | 299 | 0.160937846 | 0.00157639  |
| SNP_A.K_1005576_6_7027787  | 6 | 7027787  | 6.02E-07 | 0.28428 | 299 | 0.160932606 | 0.00157639  |



|                             |    |          |          |         |     |             |             |
|-----------------------------|----|----------|----------|---------|-----|-------------|-------------|
| SNP_A.K_1364969_8_6062335   | 8  | 6062335  | 6.04E-07 | 0.07358 | 299 | 0.16091682  | 0.001578204 |
| SNP_A.K_2081498_12_27527280 | 12 | 27527280 | 6.05E-07 | 0.02007 | 299 | 0.160905443 | 0.001578961 |
| SNP_A.K_1005335_6_7007691   | 6  | 7007691  | 6.06E-07 | 0.29599 | 299 | 0.160893611 | 0.00157983  |
| SNP_A.K_1006021_6_7096753   | 6  | 7096753  | 6.08E-07 | 0.27926 | 299 | 0.160871776 | 0.001583116 |
| SNP_A.K_1000536_6_6391746   | 6  | 6391746  | 6.09E-07 | 0.11204 | 299 | 0.160857773 | 0.001584517 |
| SNP_A.K_307066_2_7377265    | 2  | 7377265  | 6.11E-07 | 0.24916 | 299 | 0.160836869 | 0.001587592 |
| SNP_A.K_1004891_6_6949571   | 6  | 6949571  | 6.24E-07 | 0.30936 | 299 | 0.160699692 | 0.001619138 |
| SNP_A.K_1191357_7_6981949   | 7  | 6981949  | 6.25E-07 | 0.01171 | 299 | 0.160682593 | 0.001621345 |
| SNP_A.K_1364854_8_6049469   | 8  | 6049469  | 6.28E-07 | 0.07191 | 299 | 0.160658799 | 0.001625217 |
| SNP_A.K_1004213_6_6849830   | 6  | 6849830  | 6.31E-07 | 0.32441 | 299 | 0.160626069 | 0.001631323 |
| SNP_A.K_1608544_9_20775439  | 9  | 20775439 | 6.38E-07 | 0.23746 | 299 | 0.16055416  | 0.001645951 |
| SNP_A.K_1004577_6_6908410   | 6  | 6908410  | 6.38E-07 | 0.3311  | 299 | 0.160551295 | 0.001645951 |
| SNP_A.K_908231_5_17491203   | 5  | 17491203 | 6.43E-07 | 0.02508 | 299 | 0.160503084 | 0.00165605  |
| SNP_A.K_995318_6_5925965    | 6  | 5925965  | 6.47E-07 | 0.13545 | 299 | 0.160464928 | 0.001663661 |
| SNP_A.K_1000534_6_6391631   | 6  | 6391631  | 6.47E-07 | 0.1087  | 299 | 0.160456091 | 0.00166385  |
| SNP_A.K_993839_6_5796373    | 6  | 5796373  | 6.52E-07 | 0.15385 | 299 | 0.160405438 | 0.001674693 |
| SNP_A.K_1004725_6_6925686   | 6  | 6925686  | 6.55E-07 | 0.29097 | 299 | 0.16037787  | 0.001679682 |
| SNP_A.K_1599605_9_18569368  | 9  | 18569368 | 6.61E-07 | 0.04181 | 299 | 0.160323283 | 0.001691651 |
| SNP_A.K_991513_6_5536745    | 6  | 5536745  | 6.63E-07 | 0.15886 | 299 | 0.160302945 | 0.001694825 |
| SNP_A.K_993864_6_5797819    | 6  | 5797819  | 6.64E-07 | 0.16221 | 299 | 0.160294646 | 0.001694891 |
| SNP_A.K_978791_6_1782030    | 6  | 1782030  | 6.65E-07 | 0.29933 | 299 | 0.160277982 | 0.001697125 |
| SNP_A.K_1371573_8_7854648   | 8  | 7854648  | 6.66E-07 | 0.01003 | 299 | 0.160267092 | 0.001697868 |
| SNP_A.K_990266_6_4703810    | 6  | 4703810  | 6.86E-07 | 0.19064 | 299 | 0.160080159 | 0.00174488  |
| SNP_A.K_1004466_6_6884798   | 6  | 6884798  | 6.87E-07 | 0.30435 | 299 | 0.160066753 | 0.00174632  |
| SNP_A.K_1001130_6_6448378   | 6  | 6448378  | 6.91E-07 | 0.28763 | 299 | 0.160033402 | 0.001752116 |
| SNP_A.K_993406_6_5747985    | 6  | 5747985  | 6.91E-07 | 0.13545 | 299 | 0.160029076 | 0.001752116 |
| SNP_A.K_307351_2_7398399    | 2  | 7398399  | 6.96E-07 | 0.26589 | 299 | 0.159985483 | 0.001761672 |
| SNP_A.K_1004858_6_6936586   | 6  | 6936586  | 7.00E-07 | 0.2893  | 299 | 0.159946437 | 0.001770054 |
| SNP_A.K_998933_6_6235596    | 6  | 6235596  | 7.03E-07 | 0.14548 | 299 | 0.15991285  | 0.001774722 |
| SNP_A.K_1432894_8_16594506  | 8  | 16594506 | 7.04E-07 | 0.0786  | 299 | 0.159906685 | 0.001774722 |
| SNP_A.K_710043_4_8312041    | 4  | 8312041  | 7.04E-07 | 0.07358 | 299 | 0.15990536  | 0.001774722 |
| SNP_A.K_1005374_6_7010114   | 6  | 7010114  | 7.12E-07 | 0.24749 | 299 | 0.159838073 | 0.001790885 |
| SNP_A.K_993319_6_5738055    | 6  | 5738055  | 7.13E-07 | 0.12375 | 299 | 0.159821183 | 0.001793343 |
| SNP_A.K_1004183_6_6842183   | 6  | 6842183  | 7.14E-07 | 0.29933 | 299 | 0.159812507 | 0.001793554 |
| SNP_A.K_1004567_6_6906397   | 6  | 6906397  | 7.18E-07 | 0.29264 | 299 | 0.159782937 | 0.001798906 |
| SNP_A.K_990229_6_4701290    | 6  | 4701290  | 7.19E-07 | 0.199   | 299 | 0.159772328 | 0.001798906 |
| SNP_A.K_998934_6_6235624    | 6  | 6235624  | 7.19E-07 | 0.14381 | 299 | 0.159769351 | 0.001798906 |
| SNP_A.K_995312_6_5925280    | 6  | 5925280  | 7.21E-07 | 0.13712 | 299 | 0.159754669 | 0.00180078  |
| SNP_A.K_308772_2_7552377    | 2  | 7552377  | 7.23E-07 | 0.23244 | 299 | 0.159732774 | 0.001804646 |
| SNP_A.K_1608607_9_20794043  | 9  | 20794043 | 7.27E-07 | 0.24247 | 299 | 0.159700192 | 0.001810869 |
| SNP_A.K_2080242_12_27249340 | 12 | 27249340 | 7.27E-07 | 0.01003 | 299 | 0.159694557 | 0.001810869 |
| SNP_A.K_326781_2_10050198   | 2  | 10050198 | 7.28E-07 | 0.06522 | 299 | 0.159683999 | 0.001811626 |
| SNP_A.K_306774_2_7349593    | 2  | 7349593  | 7.37E-07 | 0.23244 | 299 | 0.159606947 | 0.001830889 |
| SNP_A.K_306985_2_7371938    | 2  | 7371938  | 7.40E-07 | 0.2408  | 299 | 0.159582539 | 0.001835539 |
| SNP_A.K_1003859_6_6797585   | 6  | 6797585  | 7.50E-07 | 0.01003 | 299 | 0.159494287 | 0.001858242 |
| SNP_A.K_978727_6_1771576    | 6  | 1771576  | 7.51E-07 | 0.36455 | 299 | 0.159480659 | 0.001859901 |
| SNP_A.K_1004859_6_6936639   | 6  | 6936639  | 7.57E-07 | 0.28763 | 299 | 0.159432358 | 0.001871455 |
| SNP_A.K_690102_4_4405254    | 4  | 4405254  | 7.58E-07 | 0.04682 | 299 | 0.159423249 | 0.001871838 |
| SNP_A.K_196591_1_31434679   | 1  | 31434679 | 7.65E-07 | 0.45987 | 299 | 0.159360207 | 0.00188772  |
| SNP_A.K_978143_6_1653092    | 6  | 1653092  | 7.71E-07 | 0.17559 | 299 | 0.159314976 | 0.001898565 |

|                             |    |          |          |         |     |             |             |
|-----------------------------|----|----------|----------|---------|-----|-------------|-------------|
| SNP_A.K_1006023_6_7097347   | 6  | 7097347  | 7.73E-07 | 0.28261 | 299 | 0.159294596 | 0.001902237 |
| SNP_A.K_1414837_8_13459023  | 8  | 13459023 | 7.77E-07 | 0.00669 | 299 | 0.15926482  | 0.001908658 |
| SNP_A.K_1004239_6_6853218   | 6  | 6853218  | 7.78E-07 | 0.30936 | 299 | 0.15925185  | 0.001910191 |
| SNP_A.K_1005950_6_7055238   | 6  | 7055238  | 7.83E-07 | 0.29766 | 299 | 0.159212507 | 0.001919449 |
| SNP_A.K_999038_6_6249481    | 6  | 6249481  | 7.86E-07 | 0.1388  | 299 | 0.159187752 | 0.001923096 |
| SNP_A.K_978741_6_1774311    | 6  | 1774311  | 7.86E-07 | 0.37458 | 299 | 0.159184699 | 0.001923096 |
| SNP_A.K_994710_6_5881365    | 6  | 5881365  | 7.88E-07 | 0.13043 | 299 | 0.159166436 | 0.001926209 |
| SNP_A.K_999620_6_6300986    | 6  | 6300986  | 7.95E-07 | 0.17893 | 299 | 0.159112652 | 0.001939835 |
| SNP_A.K_389624_2_19887421   | 2  | 19887421 | 8.06E-07 | 0.02341 | 299 | 0.159023082 | 0.001961545 |
| SNP_A.K_998927_6_6235106    | 6  | 6235106  | 8.06E-07 | 0.1388  | 299 | 0.159022922 | 0.001961545 |
| SNP_A.K_1004332_6_6868562   | 6  | 6868562  | 8.07E-07 | 0.30769 | 299 | 0.159012851 | 0.001961545 |
| SNP_A.K_994810_6_5891677    | 6  | 5891677  | 8.08E-07 | 0.27592 | 299 | 0.159006069 | 0.001961545 |
| SNP_A.K_1364551_8_6022345   | 8  | 6022345  | 8.09E-07 | 0.04348 | 299 | 0.159001635 | 0.001961545 |
| SNP_A.K_977942_6_1623289    | 6  | 1623289  | 8.10E-07 | 0.17726 | 299 | 0.158988005 | 0.001963349 |
| SNP_A.K_1433086_8_16617147  | 8  | 16617147 | 8.14E-07 | 0.08027 | 299 | 0.158958524 | 0.001969927 |
| SNP_A.K_1004790_6_6932649   | 6  | 6932649  | 8.15E-07 | 0.31773 | 299 | 0.158948036 | 0.001970797 |
| SNP_A.K_1005689_6_7034054   | 6  | 7034054  | 8.18E-07 | 0.14716 | 299 | 0.158923159 | 0.001976014 |
| SNP_A.K_709770_4_8285795    | 4  | 8285795  | 8.20E-07 | 0.11204 | 299 | 0.158911196 | 0.001977338 |
| SNP_A.K_307447_2_7408162    | 2  | 7408162  | 8.25E-07 | 0.26087 | 299 | 0.158872441 | 0.00198679  |
| SNP_A.K_673430_4_361606     | 4  | 361606   | 8.27E-07 | 0.04013 | 299 | 0.158853303 | 0.00199031  |
| SNP_A.K_992974_6_5693175    | 6  | 5693175  | 8.30E-07 | 0.2291  | 299 | 0.158829082 | 0.00199539  |
| SNP_A.K_307496_2_7413020    | 2  | 7413020  | 8.38E-07 | 0.23746 | 299 | 0.158770195 | 0.002011121 |
| SNP_A.K_1830578_11_10568064 | 11 | 10568064 | 8.40E-07 | 0.43144 | 299 | 0.158753935 | 0.002013807 |
| SNP_A.K_1004107_6_6834185   | 6  | 6834185  | 8.50E-07 | 0.30268 | 299 | 0.158678006 | 0.002034989 |
| SNP_A.K_978191_6_1659647    | 6  | 1659647  | 8.51E-07 | 0.17057 | 299 | 0.158663626 | 0.002037126 |
| SNP_A.K_1608576_9_20788401  | 9  | 20788401 | 8.65E-07 | 0.23411 | 299 | 0.158563861 | 0.002064796 |
| SNP_A.K_1830745_11_10577156 | 11 | 10577156 | 8.65E-07 | 0.13712 | 299 | 0.158560434 | 0.002064796 |
| SNP_A.K_307286_2_7391329    | 2  | 7391329  | 8.84E-07 | 0.23579 | 299 | 0.158417991 | 0.002107367 |
| SNP_A.K_1004143_6_6838009   | 6  | 6838009  | 8.85E-07 | 0.30936 | 299 | 0.158412094 | 0.002107367 |
| SNP_A.K_1005202_6_6993268   | 6  | 6993268  | 8.90E-07 | 0.24582 | 299 | 0.158371649 | 0.002118028 |
| SNP_A.K_1005304_6_7003659   | 6  | 7003659  | 8.99E-07 | 0.24247 | 299 | 0.158305737 | 0.002137061 |
| SNP_A.K_307002_2_7372595    | 2  | 7372595  | 9.01E-07 | 0.2408  | 299 | 0.158297318 | 0.002137376 |
| SNP_A.K_709177_4_8236729    | 4  | 8236729  | 9.08E-07 | 0.03177 | 299 | 0.158246815 | 0.002140745 |
| SNP_A.K_1003901_6_6802721   | 6  | 6802721  | 9.08E-07 | 0.31773 | 299 | 0.158244161 | 0.002140745 |
| SNP_A.K_1002949_6_6635225   | 6  | 6635225  | 9.08E-07 | 0.12207 | 299 | 0.15824237  | 0.002140745 |
| SNP_A.K_1005306_6_7004242   | 6  | 7004242  | 9.08E-07 | 0.28763 | 299 | 0.158241419 | 0.002140745 |
| SNP_A.K_710330_4_8336652    | 4  | 8336652  | 9.08E-07 | 0.07191 | 299 | 0.158240021 | 0.002140745 |
| SNP_A.K_999660_6_6303469    | 6  | 6303469  | 9.08E-07 | 0.19064 | 299 | 0.158239824 | 0.002140745 |
| SNP_A.K_306995_2_7372253    | 2  | 7372253  | 9.09E-07 | 0.23913 | 299 | 0.158235092 | 0.002140745 |
| SNP_A.K_1004579_6_6908451   | 6  | 6908451  | 9.14E-07 | 0.35452 | 299 | 0.158203442 | 0.002148711 |
| SNP_A.K_307239_2_7387199    | 2  | 7387199  | 9.20E-07 | 0.25753 | 299 | 0.158160872 | 0.002160319 |
| SNP_A.K_978782_6_1780293    | 6  | 1780293  | 9.26E-07 | 0.3194  | 299 | 0.158116959 | 0.002170814 |
| SNP_A.K_307397_2_7401005    | 2  | 7401005  | 9.27E-07 | 0.23746 | 299 | 0.158107041 | 0.002170814 |
| SNP_A.K_1005396_6_7011724   | 6  | 7011724  | 9.28E-07 | 0.26254 | 299 | 0.158100344 | 0.002170814 |
| SNP_A.K_307398_2_7401013    | 2  | 7401013  | 9.28E-07 | 0.23913 | 299 | 0.158099793 | 0.002170814 |
| SNP_A.K_997602_6_6111814    | 6  | 6111814  | 9.31E-07 | 0.1689  | 299 | 0.158081061 | 0.002174605 |
| SNP_A.K_1005399_6_7011794   | 6  | 7011794  | 9.42E-07 | 0.2709  | 299 | 0.158003661 | 0.002198064 |
| SNP_A.K_997445_6_6099901    | 6  | 6099901  | 9.58E-07 | 0.16388 | 299 | 0.157890531 | 0.002233971 |
| SNP_A.K_1003984_6_6812059   | 6  | 6812059  | 9.63E-07 | 0.30936 | 299 | 0.157856952 | 0.002240995 |
| SNP_A.K_307199_2_7384359    | 2  | 7384359  | 9.64E-07 | 0.24415 | 299 | 0.157855426 | 0.002240995 |

|                            |   |          |          |         |     |             |             |
|----------------------------|---|----------|----------|---------|-----|-------------|-------------|
| SNP_A.K_1005890_6_7050562  | 6 | 7050562  | 9.68E-07 | 0.30435 | 299 | 0.157825808 | 0.002248672 |
| SNP_A.K_1005203_6_6993291  | 6 | 6993291  | 9.74E-07 | 0.29599 | 299 | 0.157783222 | 0.002258613 |
| SNP_A.K_994374_6_5853170   | 6 | 5853170  | 9.75E-07 | 0.17057 | 299 | 0.157777936 | 0.002258613 |
| SNP_A.K_307522_2_7415041   | 2 | 7415041  | 9.75E-07 | 0.24247 | 299 | 0.157775187 | 0.002258613 |
| SNP_A.K_710120_4_8317305   | 4 | 8317305  | 9.77E-07 | 0.09866 | 299 | 0.157762117 | 0.00226012  |
| SNP_A.K_978700_6_1766110   | 6 | 1766110  | 9.79E-07 | 0.30435 | 299 | 0.157752808 | 0.00226012  |
| SNP_A.K_1433091_8_16617234 | 8 | 16617234 | 9.79E-07 | 0.07692 | 299 | 0.157749083 | 0.00226012  |
| SNP_A.K_1005238_6_6997346  | 6 | 6997346  | 9.81E-07 | 0.33612 | 299 | 0.157739204 | 0.002261036 |
| SNP_A.K_994714_6_5881943   | 6 | 5881943  | 9.86E-07 | 0.1689  | 299 | 0.1577056   | 0.002270191 |
| SNP_A.K_1389908_8_10135213 | 8 | 10135213 | 9.97E-07 | 0.05351 | 299 | 0.157631766 | 0.002293479 |
| SNP_A.K_1364627_8_6030470  | 8 | 6030470  | 9.99E-07 | 0.01338 | 299 | 0.157618431 | 0.00229491  |
| SNP_A.K_1364938_8_6060610  | 8 | 6060610  | 1.00E-06 | 0.09197 | 299 | 0.157607954 | 0.00229491  |
| SNP_A.K_1004221_6_6851101  | 6 | 6851101  | 1.00E-06 | 0.30602 | 299 | 0.157606094 | 0.00229491  |
| SNP_A.K_1430891_8_16351157 | 8 | 16351157 | 1.01E-06 | 0.09197 | 299 | 0.157576405 | 0.002302836 |
| SNP_A.K_978800_6_1782566   | 6 | 1782566  | 1.01E-06 | 0.29766 | 299 | 0.157555375 | 0.00230773  |
| SNP_A.K_978943_6_1815277   | 6 | 1815277  | 1.02E-06 | 0.30769 | 299 | 0.157492976 | 0.002327343 |
| SNP_A.K_1433085_8_16617104 | 8 | 16617104 | 1.02E-06 | 0.0786  | 299 | 0.157472832 | 0.002331979 |
| SNP_A.K_710051_4_8312772   | 4 | 8312772  | 1.03E-06 | 0.07692 | 299 | 0.157451709 | 0.002336977 |
| SNP_A.K_978780_6_1780160   | 6 | 1780160  | 1.03E-06 | 0.35452 | 299 | 0.157435289 | 0.002339751 |
| SNP_A.K_999021_6_6248779   | 6 | 6248779  | 1.03E-06 | 0.13043 | 299 | 0.157429691 | 0.002339751 |
| SNP_A.K_998244_6_6186063   | 6 | 6186063  | 1.03E-06 | 0.09197 | 299 | 0.157411737 | 0.002343636 |
| SNP_A.K_389982_2_19960545  | 2 | 19960545 | 1.03E-06 | 0.01839 | 299 | 0.157394984 | 0.002347099 |
| SNP_A.K_1004075_6_6827225  | 6 | 6827225  | 1.04E-06 | 0.30769 | 299 | 0.157367635 | 0.002353726 |
| SNP_A.K_995290_6_5924002   | 6 | 5924002  | 1.04E-06 | 0.12709 | 299 | 0.157362373 | 0.002353726 |
| SNP_A.K_995641_6_5945460   | 6 | 5945460  | 1.05E-06 | 0.27926 | 299 | 0.15731682  | 0.002365378 |
| SNP_A.K_307025_2_7373332   | 2 | 7373332  | 1.05E-06 | 0.23579 | 299 | 0.15731597  | 0.002365378 |
| SNP_A.K_306724_2_7345368   | 2 | 7345368  | 1.05E-06 | 0.2408  | 299 | 0.157295962 | 0.00237007  |
| SNP_A.K_978723_6_1771530   | 6 | 1771530  | 1.06E-06 | 0.36789 | 299 | 0.157237872 | 0.002387328 |
| SNP_A.K_1005606_6_7029584  | 6 | 7029584  | 1.06E-06 | 0.13712 | 299 | 0.157231087 | 0.002387328 |
| SNP_A.K_1005573_6_7027557  | 6 | 7027557  | 1.06E-06 | 0.32776 | 299 | 0.157223235 | 0.002387328 |
| SNP_A.K_992723_6_5676274   | 6 | 5676274  | 1.06E-06 | 0.14214 | 299 | 0.157220391 | 0.002387328 |
| SNP_A.K_1371510_8_7850476  | 8 | 7850476  | 1.07E-06 | 0.01003 | 299 | 0.157201516 | 0.002391663 |
| SNP_A.K_992887_6_5683118   | 6 | 5683118  | 1.08E-06 | 0.12876 | 299 | 0.157110347 | 0.002422713 |
| SNP_A.K_994585_6_5874707   | 6 | 5874707  | 1.10E-06 | 0.25251 | 299 | 0.157001589 | 0.002457493 |
| SNP_A.K_1005402_6_7012375  | 6 | 7012375  | 1.10E-06 | 0.39298 | 299 | 0.156994755 | 0.002457493 |
| SNP_A.K_1005230_6_6996133  | 6 | 6996133  | 1.10E-06 | 0.23913 | 299 | 0.156994512 | 0.002457493 |
| SNP_A.K_1433147_8_16620252 | 8 | 16620252 | 1.10E-06 | 0.08194 | 299 | 0.156989339 | 0.002457493 |
| SNP_A.K_1004444_6_6882872  | 6 | 6882872  | 1.10E-06 | 0.30769 | 299 | 0.156981036 | 0.002457987 |
| SNP_A.K_710335_4_8336738   | 4 | 8336738  | 1.12E-06 | 0.08528 | 299 | 0.156900296 | 0.002483365 |
| SNP_A.K_306955_2_7370604   | 2 | 7370604  | 1.12E-06 | 0.24582 | 299 | 0.156900093 | 0.002483365 |
| SNP_A.K_1004336_6_6869601  | 6 | 6869601  | 1.12E-06 | 0.31773 | 299 | 0.156887525 | 0.002485498 |
| SNP_A.K_1005226_6_6995408  | 6 | 6995408  | 1.13E-06 | 0.24582 | 299 | 0.156844393 | 0.002499325 |
| SNP_A.K_978744_6_1774722   | 6 | 1774722  | 1.13E-06 | 0.30435 | 299 | 0.156833616 | 0.002500791 |
| SNP_A.K_1004629_6_6912352  | 6 | 6912352  | 1.13E-06 | 0.29766 | 299 | 0.1568234   | 0.002502046 |
| SNP_A.K_1371560_8_7852756  | 8 | 7852756  | 1.13E-06 | 0.02007 | 299 | 0.156790127 | 0.002512172 |
| SNP_A.K_1005320_6_7005799  | 6 | 7005799  | 1.14E-06 | 0.29933 | 299 | 0.156780981 | 0.002513026 |
| SNP_A.K_1005031_6_6963051  | 6 | 6963051  | 1.14E-06 | 0.30435 | 299 | 0.156751019 | 0.002521923 |
| SNP_A.K_1005490_6_7016833  | 6 | 7016833  | 1.15E-06 | 0.24749 | 299 | 0.156716321 | 0.002532694 |
| SNP_A.K_1005261_6_7000150  | 6 | 7000150  | 1.15E-06 | 0.2893  | 299 | 0.156679574 | 0.002544314 |
| SNP_A.K_990383_6_4712914   | 6 | 4712914  | 1.16E-06 | 0.20067 | 299 | 0.156649353 | 0.002553433 |

|                             |    |          |          |         |     |             |             |
|-----------------------------|----|----------|----------|---------|-----|-------------|-------------|
| SNP_A.K_978774_6_1779898    | 6  | 1779898  | 1.17E-06 | 0.29766 | 299 | 0.156615518 | 0.00256401  |
| SNP_A.K_1005197_6_6992009   | 6  | 6992009  | 1.17E-06 | 0.23746 | 299 | 0.156569686 | 0.002579378 |
| SNP_A.K_990353_6_4712175    | 6  | 4712175  | 1.18E-06 | 0.20234 | 299 | 0.156516642 | 0.002597715 |
| SNP_A.K_195535_1_31223944   | 1  | 31223944 | 1.19E-06 | 0.48829 | 299 | 0.156498206 | 0.00260233  |
| SNP_A.K_997541_6_6108212    | 6  | 6108212  | 1.19E-06 | 0.14381 | 299 | 0.156477776 | 0.002607753 |
| SNP_A.K_998495_6_6205629    | 6  | 6205629  | 1.20E-06 | 0.12709 | 299 | 0.156448859 | 0.002614558 |
| SNP_A.K_152999_1_23782002   | 1  | 23782002 | 1.20E-06 | 0.03679 | 299 | 0.156447092 | 0.002614558 |
| SNP_A.K_993888_6_5799435    | 6  | 5799435  | 1.20E-06 | 0.15552 | 299 | 0.156423508 | 0.002621285 |
| SNP_A.K_978128_6_1648960    | 6  | 1648960  | 1.21E-06 | 0.17559 | 299 | 0.156386306 | 0.002630839 |
| SNP_A.K_978882_6_1794586    | 6  | 1794586  | 1.21E-06 | 0.30435 | 299 | 0.156386142 | 0.002630839 |
| SNP_A.K_997881_6_6155417    | 6  | 6155417  | 1.22E-06 | 0.14716 | 299 | 0.156315141 | 0.002653378 |
| SNP_A.K_691242_4_4565343    | 4  | 4565343  | 1.22E-06 | 0.05017 | 299 | 0.156314047 | 0.002653378 |
| SNP_A.K_307422_2_7403442    | 2  | 7403442  | 1.22E-06 | 0.24247 | 299 | 0.156310131 | 0.002653378 |
| SNP_A.K_689899_4_4326361    | 4  | 4326361  | 1.22E-06 | 0.05853 | 299 | 0.156302345 | 0.002653781 |
| SNP_A.K_307424_2_7403784    | 2  | 7403784  | 1.22E-06 | 0.26254 | 299 | 0.156292707 | 0.002654942 |
| SNP_A.K_1433093_8_16617315  | 8  | 16617315 | 1.23E-06 | 0.08027 | 299 | 0.156284638 | 0.002655466 |
| SNP_A.K_62575_1_8994875     | 1  | 8994875  | 1.23E-06 | 0.01003 | 299 | 0.156250183 | 0.002666773 |
| SNP_A.K_997887_6_6155512    | 6  | 6155512  | 1.24E-06 | 0.14883 | 299 | 0.15621687  | 0.002677663 |
| SNP_A.K_1005378_6_7010978   | 6  | 7010978  | 1.24E-06 | 0.24582 | 299 | 0.156184597 | 0.002688172 |
| SNP_A.K_1364867_8_6050039   | 8  | 6050039  | 1.26E-06 | 0.08863 | 299 | 0.156123458 | 0.002705637 |
| SNP_A.K_1004882_6_6949017   | 6  | 6949017  | 1.26E-06 | 0.07023 | 299 | 0.156117114 | 0.002705637 |
| SNP_A.K_978693_6_1764700    | 6  | 1764700  | 1.26E-06 | 0.27258 | 299 | 0.15611366  | 0.002705637 |
| SNP_A.K_1001259_6_6459698   | 6  | 6459698  | 1.26E-06 | 0.29264 | 299 | 0.156113267 | 0.002705637 |
| SNP_A.K_307277_2_7390966    | 2  | 7390966  | 1.26E-06 | 0.23913 | 299 | 0.156108723 | 0.002705637 |
| SNP_A.K_307288_2_7391384    | 2  | 7391384  | 1.27E-06 | 0.23579 | 299 | 0.156062566 | 0.002716863 |
| SNP_A.K_978629_6_1747288    | 6  | 1747288  | 1.27E-06 | 0.28094 | 299 | 0.156062337 | 0.002716863 |
| SNP_A.K_307276_2_7390963    | 2  | 7390963  | 1.27E-06 | 0.23913 | 299 | 0.156057108 | 0.002716863 |
| SNP_A.K_1830665_11_10573230 | 11 | 10573230 | 1.27E-06 | 0.17224 | 299 | 0.156054931 | 0.002716863 |
| SNP_A.K_1000712_6_6413366   | 6  | 6413366  | 1.28E-06 | 0.35284 | 299 | 0.15602346  | 0.002727221 |
| SNP_A.K_1608555_9_20777132  | 9  | 20777132 | 1.28E-06 | 0.22575 | 299 | 0.156002169 | 0.00273275  |
| SNP_A.K_1004483_6_6886544   | 6  | 6886544  | 1.28E-06 | 0.30602 | 299 | 0.155996915 | 0.00273275  |
| SNP_A.K_978937_6_1814428    | 6  | 1814428  | 1.28E-06 | 0.32441 | 299 | 0.155989385 | 0.002733111 |
| SNP_A.K_978907_6_1800538    | 6  | 1800538  | 1.30E-06 | 0.30769 | 299 | 0.155891526 | 0.002771662 |
| SNP_A.K_998196_6_6184023    | 6  | 6184023  | 1.31E-06 | 0.12876 | 299 | 0.155877556 | 0.002774778 |
| SNP_A.K_1196546_7_7627910   | 7  | 7627910  | 1.31E-06 | 0.01171 | 299 | 0.155839172 | 0.002788338 |
| SNP_A.K_1433131_8_16618779  | 8  | 16618779 | 1.32E-06 | 0.08194 | 299 | 0.155827978 | 0.002790289 |
| SNP_A.K_689894_4_4325517    | 4  | 4325517  | 1.34E-06 | 0.05184 | 299 | 0.155721078 | 0.002833601 |
| SNP_A.K_1005227_6_6995623   | 6  | 6995623  | 1.34E-06 | 0.23579 | 299 | 0.155711919 | 0.002834704 |
| SNP_A.K_306837_2_7358494    | 2  | 7358494  | 1.34E-06 | 0.27258 | 299 | 0.155704921 | 0.002834869 |
| SNP_A.K_998179_6_6183266    | 6  | 6183266  | 1.35E-06 | 0.12709 | 299 | 0.155641664 | 0.00285965  |
| SNP_A.K_306859_2_7360914    | 2  | 7360914  | 1.36E-06 | 0.24415 | 299 | 0.155601204 | 0.002872489 |
| SNP_A.K_1004142_6_6837841   | 6  | 6837841  | 1.36E-06 | 0.31438 | 299 | 0.155599309 | 0.002872489 |
| SNP_A.K_1371552_8_7852191   | 8  | 7852191  | 1.37E-06 | 0.00669 | 299 | 0.155564099 | 0.002885149 |
| SNP_A.K_978885_6_1795798    | 6  | 1795798  | 1.37E-06 | 0.29431 | 299 | 0.155541147 | 0.002892415 |
| SNP_A.K_1004730_6_6925934   | 6  | 6925934  | 1.38E-06 | 0.29599 | 299 | 0.155522577 | 0.002897751 |
| SNP_A.K_1004391_6_6879086   | 6  | 6879086  | 1.38E-06 | 0.30936 | 299 | 0.155514268 | 0.002898526 |
| SNP_A.K_992731_6_5676620    | 6  | 5676620  | 1.39E-06 | 0.17391 | 299 | 0.155477542 | 0.002909272 |
| SNP_A.K_194836_1_30970379   | 1  | 30970379 | 1.39E-06 | 0.46823 | 299 | 0.155470302 | 0.002909272 |
| SNP_A.K_978862_6_1789336    | 6  | 1789336  | 1.39E-06 | 0.32274 | 299 | 0.15546116  | 0.002909272 |
| SNP_A.K_1000553_6_6394370   | 6  | 6394370  | 1.39E-06 | 0.11371 | 299 | 0.155459689 | 0.002909272 |

|                             |    |          |          |         |     |             |             |
|-----------------------------|----|----------|----------|---------|-----|-------------|-------------|
| SNP_A.K_978626_6_1746099    | 6  | 1746099  | 1.39E-06 | 0.27926 | 299 | 0.155457441 | 0.002909272 |
| SNP_A.K_307244_2_7387782    | 2  | 7387782  | 1.40E-06 | 0.23244 | 299 | 0.155426006 | 0.00292043  |
| SNP_A.K_978290_6_1669653    | 6  | 1669653  | 1.41E-06 | 0.24582 | 299 | 0.155361185 | 0.002946717 |
| SNP_A.K_1830646_11_10572639 | 11 | 10572639 | 1.42E-06 | 0.16054 | 299 | 0.155327777 | 0.002958923 |
| SNP_A.K_306730_2_7346016    | 2  | 7346016  | 1.43E-06 | 0.23746 | 299 | 0.155297983 | 0.002969534 |
| SNP_A.K_992651_6_5669933    | 6  | 5669933  | 1.43E-06 | 0.11873 | 299 | 0.155269247 | 0.002977897 |
| SNP_A.K_978881_6_1794548    | 6  | 1794548  | 1.43E-06 | 0.30769 | 299 | 0.155266691 | 0.002977897 |
| SNP_A.K_977864_6_1604765    | 6  | 1604765  | 1.44E-06 | 0.16388 | 299 | 0.155246585 | 0.002984138 |
| SNP_A.K_1364543_8_6019942   | 8  | 6019942  | 1.44E-06 | 0.08863 | 299 | 0.155232565 | 0.002987598 |
| SNP_A.K_1365025_8_6067016   | 8  | 6067016  | 1.45E-06 | 0.09197 | 299 | 0.155194053 | 0.003000169 |
| SNP_A.K_992743_6_5677380    | 6  | 5677380  | 1.45E-06 | 0.14381 | 299 | 0.155192311 | 0.003000169 |
| SNP_A.K_709961_4_8303580    | 4  | 8303580  | 1.46E-06 | 0.07525 | 299 | 0.15515565  | 0.003014132 |
| SNP_A.K_1001186_6_6453319   | 6  | 6453319  | 1.46E-06 | 0.2893  | 299 | 0.155139525 | 0.003018617 |
| SNP_A.K_1830651_11_10572843 | 11 | 10572843 | 1.47E-06 | 0.14047 | 299 | 0.155102465 | 0.003032859 |
| SNP_A.K_678443_4_986682     | 4  | 986682   | 1.48E-06 | 0.07358 | 299 | 0.155063385 | 0.003048119 |
| SNP_A.K_978946_6_1817571    | 6  | 1817571  | 1.49E-06 | 0.30268 | 299 | 0.155019387 | 0.003065778 |
| SNP_A.K_978875_6_1793947    | 6  | 1793947  | 1.50E-06 | 0.30268 | 299 | 0.154988466 | 0.003077347 |
| SNP_A.K_1004126_6_6835977   | 6  | 6835977  | 1.51E-06 | 0.32441 | 299 | 0.154947156 | 0.003093905 |
| SNP_A.K_1197718_7_7779740   | 7  | 7779740  | 1.51E-06 | 0.01171 | 299 | 0.154927736 | 0.0031001   |
| SNP_A.K_708903_4_8123035    | 4  | 8123035  | 1.51E-06 | 0.08696 | 299 | 0.154918742 | 0.003101333 |
| SNP_A.K_710336_4_8336745    | 4  | 8336745  | 1.52E-06 | 0.08696 | 299 | 0.154886278 | 0.00311379  |
| SNP_A.K_978823_6_1785260    | 6  | 1785260  | 1.52E-06 | 0.30602 | 299 | 0.154867338 | 0.003119155 |
| SNP_A.K_326118_2_9978595    | 2  | 9978595  | 1.53E-06 | 0.12709 | 299 | 0.154862302 | 0.003119155 |
| SNP_A.K_710482_4_8424260    | 4  | 8424260  | 1.54E-06 | 0.07692 | 299 | 0.15481411  | 0.00313928  |
| SNP_A.K_1383210_8_9134678   | 8  | 9134678  | 1.54E-06 | 0.11204 | 299 | 0.15479505  | 0.003145412 |
| SNP_A.K_998176_6_6183195    | 6  | 6183195  | 1.55E-06 | 0.13043 | 299 | 0.154756833 | 0.003160861 |
| SNP_A.K_1433129_8_16618538  | 8  | 16618538 | 1.57E-06 | 0.0786  | 299 | 0.154690044 | 0.003190384 |
| SNP_A.K_990338_6_4711401    | 6  | 4711401  | 1.57E-06 | 0.20569 | 299 | 0.154660058 | 0.003202005 |
| SNP_A.K_1364542_8_6019669   | 8  | 6019669  | 1.58E-06 | 0.08194 | 299 | 0.154638503 | 0.003209505 |
| SNP_A.K_307389_2_7400292    | 2  | 7400292  | 1.58E-06 | 0.24247 | 299 | 0.154627795 | 0.003210387 |
| SNP_A.K_992698_6_5672329    | 6  | 5672329  | 1.58E-06 | 0.19064 | 299 | 0.154624038 | 0.003210387 |
| SNP_A.K_978708_6_1769211    | 6  | 1769211  | 1.58E-06 | 0.32274 | 299 | 0.154616079 | 0.003211192 |
| SNP_A.K_1364538_8_6017574   | 8  | 6017574  | 1.59E-06 | 0.08696 | 299 | 0.15460744  | 0.003212335 |
| SNP_A.K_994756_6_5887341    | 6  | 5887341  | 1.59E-06 | 0.27759 | 299 | 0.15459842  | 0.003213671 |
| SNP_A.K_978699_6_1766108    | 6  | 1766108  | 1.60E-06 | 0.30769 | 299 | 0.154557295 | 0.003230934 |
| SNP_A.K_307032_2_7374120    | 2  | 7374120  | 1.61E-06 | 0.23579 | 299 | 0.154522294 | 0.003245234 |
| SNP_A.K_1608543_9_20775423  | 9  | 20775423 | 1.61E-06 | 0.2408  | 299 | 0.154493756 | 0.00325636  |
| SNP_A.K_254326_1_41018019   | 1  | 41018019 | 1.62E-06 | 0.03344 | 299 | 0.154476199 | 0.003262011 |
| SNP_A.K_1005267_6_7001492   | 6  | 7001492  | 1.62E-06 | 0.28261 | 299 | 0.154452524 | 0.003270753 |
| SNP_A.K_978886_6_1796372    | 6  | 1796372  | 1.65E-06 | 0.31104 | 299 | 0.154365261 | 0.003309197 |
| SNP_A.K_1005224_6_6995267   | 6  | 6995267  | 1.65E-06 | 0.24749 | 299 | 0.154364055 | 0.003309197 |
| SNP_A.K_978602_6_1738545    | 6  | 1738545  | 1.65E-06 | 0.25084 | 299 | 0.154355605 | 0.003310309 |
| SNP_A.K_995335_6_5926428    | 6  | 5926428  | 1.66E-06 | 0.13712 | 299 | 0.154312541 | 0.003329117 |
| SNP_A.K_998075_6_6169972    | 6  | 6169972  | 1.67E-06 | 0.26254 | 299 | 0.15427386  | 0.003345778 |
| SNP_A.K_993473_6_5755450    | 6  | 5755450  | 1.68E-06 | 0.13712 | 299 | 0.154217072 | 0.003371914 |
| SNP_A.K_978338_6_1679798    | 6  | 1679798  | 1.69E-06 | 0.25753 | 299 | 0.154208783 | 0.003372977 |
| SNP_A.K_1004443_6_6882848   | 6  | 6882848  | 1.70E-06 | 0.30936 | 299 | 0.154164554 | 0.003392767 |
| SNP_A.K_978636_6_1748174    | 6  | 1748174  | 1.70E-06 | 0.2709  | 299 | 0.154148986 | 0.003397649 |
| SNP_A.K_1830662_11_10573134 | 11 | 10573134 | 1.72E-06 | 0.16054 | 299 | 0.154099916 | 0.003420141 |
| SNP_A.K_1004559_6_6904539   | 6  | 6904539  | 1.72E-06 | 0.29933 | 299 | 0.154086433 | 0.003423151 |

|                             |    |          |          |         |     |             |             |
|-----------------------------|----|----------|----------|---------|-----|-------------|-------------|
| SNP_A.K_978011_6_1636239    | 6  | 1636239  | 1.72E-06 | 0.17726 | 299 | 0.154079808 | 0.003423151 |
| SNP_A.K_1004337_6_6869619   | 6  | 6869619  | 1.72E-06 | 0.32107 | 299 | 0.154075571 | 0.003423151 |
| SNP_A.K_978822_6_1785046    | 6  | 1785046  | 1.73E-06 | 0.30268 | 299 | 0.154051235 | 0.003431253 |
| SNP_A.K_993616_6_5779663    | 6  | 5779663  | 1.73E-06 | 0.12542 | 299 | 0.154046176 | 0.003431253 |
| SNP_A.K_306996_2_7372370    | 2  | 7372370  | 1.73E-06 | 0.23746 | 299 | 0.154032639 | 0.003431253 |
| SNP_A.K_978873_6_1793728    | 6  | 1793728  | 1.73E-06 | 0.33278 | 299 | 0.154031376 | 0.003431253 |
| SNP_A.K_1183403_7_4541227   | 7  | 4541227  | 1.73E-06 | 0.4097  | 299 | 0.154029287 | 0.003431253 |
| SNP_A.K_1910769_11_22488147 | 11 | 22488147 | 1.74E-06 | 0.04013 | 299 | 0.154016686 | 0.003434654 |
| SNP_A.K_307380_2_7399803    | 2  | 7399803  | 1.76E-06 | 0.2408  | 299 | 0.153939618 | 0.00347237  |
| SNP_A.K_998878_6_6230113    | 6  | 6230113  | 1.77E-06 | 0.26087 | 299 | 0.153907141 | 0.003486477 |
| SNP_A.K_997949_6_6162004    | 6  | 6162004  | 1.77E-06 | 0.17559 | 299 | 0.153895994 | 0.003487287 |
| SNP_A.K_1004543_6_6899633   | 6  | 6899633  | 1.77E-06 | 0.30435 | 299 | 0.153893337 | 0.003487287 |
| SNP_A.K_1364935_8_6060324   | 8  | 6060324  | 1.77E-06 | 0.09365 | 299 | 0.15388321  | 0.003489431 |
| SNP_A.K_1830640_11_10572252 | 11 | 10572252 | 1.78E-06 | 0.16555 | 299 | 0.153861277 | 0.003497934 |
| SNP_A.K_325494_2_9897261    | 2  | 9897261  | 1.79E-06 | 0.02676 | 299 | 0.153824126 | 0.003514693 |
| SNP_A.K_1004397_6_6879525   | 6  | 6879525  | 1.81E-06 | 0.31271 | 299 | 0.153765842 | 0.003543053 |
| SNP_A.K_307243_2_7387725    | 2  | 7387725  | 1.82E-06 | 0.24415 | 299 | 0.153714534 | 0.003567811 |
| SNP_A.K_998178_6_6183220    | 6  | 6183220  | 1.83E-06 | 0.13043 | 299 | 0.153691073 | 0.003577364 |
| SNP_A.K_978920_6_1804367    | 6  | 1804367  | 1.83E-06 | 0.30769 | 299 | 0.153680162 | 0.003579827 |
| SNP_A.K_993806_6_5794260    | 6  | 5794260  | 1.83E-06 | 0.06856 | 299 | 0.153674407 | 0.003579827 |
| SNP_A.K_1004611_6_6910377   | 6  | 6910377  | 1.84E-06 | 0.28261 | 299 | 0.153660459 | 0.003584164 |
| SNP_A.K_990243_6_4702847    | 6  | 4702847  | 1.85E-06 | 0.21237 | 299 | 0.153618122 | 0.003604244 |
| SNP_A.K_306808_2_7352837    | 2  | 7352837  | 1.86E-06 | 0.24247 | 299 | 0.153577043 | 0.003623737 |
| SNP_A.K_308786_2_7553821    | 2  | 7553821  | 1.86E-06 | 0.22241 | 299 | 0.153570656 | 0.003623913 |
| SNP_A.K_1003928_6_6806023   | 6  | 6806023  | 1.88E-06 | 0.31773 | 299 | 0.153518839 | 0.003647557 |
| SNP_A.K_1390329_8_10181900  | 8  | 10181900 | 1.88E-06 | 0.04348 | 299 | 0.153516334 | 0.003647557 |
| SNP_A.K_1004470_6_6884885   | 6  | 6884885  | 1.89E-06 | 0.31104 | 299 | 0.153482077 | 0.003663277 |
| SNP_A.K_1627148_10_1890862  | 10 | 1890862  | 1.89E-06 | 0.02676 | 299 | 0.153476329 | 0.003663277 |
| SNP_A.K_307381_2_7399817    | 2  | 7399817  | 1.90E-06 | 0.25585 | 299 | 0.153445284 | 0.003677422 |
| SNP_A.K_1004185_6_6842554   | 6  | 6842554  | 1.90E-06 | 0.32274 | 299 | 0.153426623 | 0.003683497 |
| SNP_A.K_1608611_9_20794190  | 9  | 20794190 | 1.90E-06 | 0.23077 | 299 | 0.153422506 | 0.003683497 |
| SNP_A.K_1004607_6_6910020   | 6  | 6910020  | 1.91E-06 | 0.31271 | 299 | 0.153401281 | 0.003691691 |
| SNP_A.K_1005284_6_7002464   | 6  | 7002464  | 1.91E-06 | 0.27592 | 299 | 0.153396045 | 0.003691691 |
| SNP_A.K_978931_6_1808335    | 6  | 1808335  | 1.92E-06 | 0.32943 | 299 | 0.153369449 | 0.003699428 |
| SNP_A.K_710337_4_8336757    | 4  | 8336757  | 1.92E-06 | 0.08528 | 299 | 0.153368878 | 0.003699428 |
| SNP_A.K_978771_6_1779134    | 6  | 1779134  | 1.92E-06 | 0.2893  | 299 | 0.153364439 | 0.003699428 |
| SNP_A.K_978749_6_1775031    | 6  | 1775031  | 1.93E-06 | 0.39298 | 299 | 0.153345624 | 0.003706745 |
| SNP_A.K_1004606_6_6909984   | 6  | 6909984  | 1.93E-06 | 0.31605 | 299 | 0.153337316 | 0.003708069 |
| SNP_A.K_978683_6_1760683    | 6  | 1760683  | 1.93E-06 | 0.27425 | 299 | 0.153319165 | 0.00371503  |
| SNP_A.K_978656_6_1750694    | 6  | 1750694  | 1.94E-06 | 0.30602 | 299 | 0.153296751 | 0.003724455 |
| SNP_A.K_996337_6_5988903    | 6  | 5988903  | 1.94E-06 | 0.27592 | 299 | 0.153289022 | 0.003725461 |
| SNP_A.K_1005290_6_7002660   | 6  | 7002660  | 1.95E-06 | 0.23077 | 299 | 0.153272694 | 0.003731417 |
| SNP_A.K_978456_6_1694918    | 6  | 1694918  | 1.95E-06 | 0.26421 | 299 | 0.153262804 | 0.003733676 |
| SNP_A.K_1003971_6_6809950   | 6  | 6809950  | 1.96E-06 | 0.31605 | 299 | 0.153246188 | 0.003738741 |
| SNP_A.K_995813_6_5951565    | 6  | 5951565  | 1.96E-06 | 0.30268 | 299 | 0.153242101 | 0.003738741 |
| SNP_A.K_389619_2_19887270   | 2  | 19887270 | 1.96E-06 | 0.04181 | 299 | 0.153231054 | 0.003741683 |
| SNP_A.K_996036_6_5958801    | 6  | 5958801  | 1.97E-06 | 0.2709  | 299 | 0.153193184 | 0.003759966 |
| SNP_A.K_978464_6_1696320    | 6  | 1696320  | 1.97E-06 | 0.24916 | 299 | 0.153187565 | 0.003759966 |
| SNP_A.K_978850_6_1787636    | 6  | 1787636  | 1.99E-06 | 0.35619 | 299 | 0.153133268 | 0.003788116 |
| SNP_A.K_990245_6_4702919    | 6  | 4702919  | 2.00E-06 | 0.21237 | 299 | 0.15309818  | 0.003803057 |

|                             |    |          |          |         |     |             |             |
|-----------------------------|----|----------|----------|---------|-----|-------------|-------------|
| SNP_A.K_1004608_6_6910068   | 6  | 6910068  | 2.00E-06 | 0.29431 | 299 | 0.1530959   | 0.003803057 |
| SNP_A.K_1004037_6_6820951   | 6  | 6820951  | 2.01E-06 | 0.29766 | 299 | 0.153073553 | 0.003810616 |
| SNP_A.K_1195882_7_7549486   | 7  | 7549486  | 2.01E-06 | 0.01171 | 299 | 0.153071204 | 0.003810616 |
| SNP_A.K_978748_6_1775022    | 6  | 1775022  | 2.02E-06 | 0.36957 | 299 | 0.153044637 | 0.003822781 |
| SNP_A.K_1006002_6_7095126   | 6  | 7095126  | 2.04E-06 | 0.27926 | 299 | 0.152981179 | 0.003856873 |
| SNP_A.K_1784823_11_3799601  | 11 | 3799601  | 2.04E-06 | 0.01003 | 299 | 0.152968963 | 0.003860638 |
| SNP_A.K_1004071_6_6825613   | 6  | 6825613  | 2.05E-06 | 0.29933 | 299 | 0.152945591 | 0.003871067 |
| SNP_A.K_1005408_6_7012542   | 6  | 7012542  | 2.05E-06 | 0.37458 | 299 | 0.152939536 | 0.003871171 |
| SNP_A.K_1858455_11_15010731 | 11 | 15010731 | 2.06E-06 | 0.0903  | 299 | 0.152925199 | 0.003876228 |
| SNP_A.K_307148_2_7381718    | 2  | 7381718  | 2.06E-06 | 0.24247 | 299 | 0.152915544 | 0.003878493 |
| SNP_A.K_307089_2_7378365    | 2  | 7378365  | 2.06E-06 | 0.25251 | 299 | 0.152906377 | 0.00388047  |
| SNP_A.K_709873_4_8300080    | 4  | 8300080  | 2.08E-06 | 0.06689 | 299 | 0.152855524 | 0.0039075   |
| SNP_A.K_306722_2_7345318    | 2  | 7345318  | 2.08E-06 | 0.24582 | 299 | 0.152849364 | 0.003907686 |
| SNP_A.K_1602001_9_19102756  | 9  | 19102756 | 2.08E-06 | 0.11037 | 299 | 0.152836979 | 0.003911629 |
| SNP_A.K_990307_6_4709831    | 6  | 4709831  | 2.09E-06 | 0.20569 | 299 | 0.152815239 | 0.003921236 |
| SNP_A.K_306908_2_7364967    | 2  | 7364967  | 2.12E-06 | 0.2408  | 299 | 0.15272388  | 0.003968569 |
| SNP_A.K_306811_2_7352987    | 2  | 7352987  | 2.12E-06 | 0.23913 | 299 | 0.152720496 | 0.003968569 |
| SNP_A.K_1830586_11_10568737 | 11 | 10568737 | 2.12E-06 | 0.1689  | 299 | 0.152719987 | 0.003968569 |
| SNP_A.K_2078892_12_27033066 | 12 | 27033066 | 2.13E-06 | 0.01171 | 299 | 0.152697111 | 0.003979028 |
| SNP_A.K_710052_4_8312782    | 4  | 8312782  | 2.14E-06 | 0.0786  | 299 | 0.152666518 | 0.003994273 |
| SNP_A.K_995957_6_5955892    | 6  | 5955892  | 2.14E-06 | 0.29933 | 299 | 0.152656886 | 0.003996631 |
| SNP_A.K_1004389_6_6878989   | 6  | 6878989  | 2.16E-06 | 0.31773 | 299 | 0.15260891  | 0.004022728 |
| SNP_A.K_1364553_8_6022926   | 8  | 6022926  | 2.16E-06 | 0.04682 | 299 | 0.152599433 | 0.004025013 |
| SNP_A.K_977891_6_1613741    | 6  | 1613741  | 2.18E-06 | 0.15886 | 299 | 0.152552266 | 0.004050799 |
| SNP_A.K_1390218_8_10163233  | 8  | 10163233 | 2.18E-06 | 0.04682 | 299 | 0.152537712 | 0.004052945 |
| SNP_A.K_977897_6_1616556    | 6  | 1616556  | 2.18E-06 | 0.23913 | 299 | 0.152537265 | 0.004052945 |
| SNP_A.K_1005520_6_7018966   | 6  | 7018966  | 2.19E-06 | 0.28261 | 299 | 0.152513731 | 0.004063725 |
| SNP_A.K_997271_6_6082627    | 6  | 6082627  | 2.19E-06 | 0.13712 | 299 | 0.15250851  | 0.004063725 |
| SNP_A.K_307442_2_7407713    | 2  | 7407713  | 2.20E-06 | 0.2592  | 299 | 0.152496114 | 0.004067886 |
| SNP_A.K_456553_2_33063997   | 2  | 33063997 | 2.21E-06 | 0.02676 | 299 | 0.152465079 | 0.004083788 |
| SNP_A.K_709845_4_8299480    | 4  | 8299480  | 2.21E-06 | 0.06856 | 299 | 0.152452578 | 0.004088043 |
| SNP_A.K_978860_6_1789007    | 6  | 1789007  | 2.22E-06 | 0.30936 | 299 | 0.152415635 | 0.004107776 |
| SNP_A.K_978851_6_1787641    | 6  | 1787641  | 2.23E-06 | 0.3612  | 299 | 0.152386913 | 0.004122374 |
| SNP_A.K_678702_4_994397     | 4  | 994397   | 2.24E-06 | 0.08863 | 299 | 0.15237503  | 0.004126286 |
| SNP_A.K_882922_5_7668003    | 5  | 7668003  | 2.24E-06 | 0.02676 | 299 | 0.152365281 | 0.004128844 |
| SNP_A.K_1005294_6_7002697   | 6  | 7002697  | 2.25E-06 | 0.28094 | 299 | 0.152351983 | 0.004133672 |
| SNP_A.K_307352_2_7398452    | 2  | 7398452  | 2.25E-06 | 0.26923 | 299 | 0.152345961 | 0.004133862 |
| SNP_A.K_1599653_9_18583529  | 9  | 18583529 | 2.25E-06 | 0.06355 | 299 | 0.152339363 | 0.004134423 |
| SNP_A.K_978855_6_1788384    | 6  | 1788384  | 2.27E-06 | 0.31271 | 299 | 0.152285534 | 0.004165254 |
| SNP_A.K_1003862_6_6798743   | 6  | 6798743  | 2.28E-06 | 0.17559 | 299 | 0.152261436 | 0.004177099 |
| SNP_A.K_1004890_6_6949544   | 6  | 6949544  | 2.29E-06 | 0.34114 | 299 | 0.152239092 | 0.004186795 |
| SNP_A.K_978646_6_1749357    | 6  | 1749357  | 2.29E-06 | 0.34615 | 299 | 0.152230287 | 0.004186795 |
| SNP_A.K_325546_2_9901614    | 2  | 9901614  | 2.29E-06 | 0.03846 | 299 | 0.152229048 | 0.004186795 |
| SNP_A.K_990585_6_4726935    | 6  | 4726935  | 2.29E-06 | 0.11706 | 299 | 0.15222364  | 0.004186795 |
| SNP_A.K_998065_6_6168312    | 6  | 6168312  | 2.29E-06 | 0.16555 | 299 | 0.152215683 | 0.004188266 |
| SNP_A.K_1364931_8_6060126   | 8  | 6060126  | 2.30E-06 | 0.08863 | 299 | 0.152187419 | 0.004202901 |
| SNP_A.K_1608676_9_20815198  | 9  | 20815198 | 2.31E-06 | 0.24247 | 299 | 0.152159872 | 0.004217124 |
| SNP_A.K_526677_3_10964889   | 3  | 10964889 | 2.32E-06 | 0.01003 | 299 | 0.152131984 | 0.00422423  |
| SNP_A.K_528922_3_11353842   | 3  | 11353842 | 2.32E-06 | 0.01003 | 299 | 0.152131984 | 0.00422423  |
| SNP_A.K_528340_3_11270505   | 3  | 11270505 | 2.32E-06 | 0.01003 | 299 | 0.152131984 | 0.00422423  |

|                             |    |          |          |         |     |             |             |
|-----------------------------|----|----------|----------|---------|-----|-------------|-------------|
| SNP_A.K_978277_6_1666751    | 6  | 1666751  | 2.34E-06 | 0.1806  | 299 | 0.15209696  | 0.004243437 |
| SNP_A.K_978601_6_1738375    | 6  | 1738375  | 2.35E-06 | 0.2592  | 299 | 0.152060704 | 0.004259464 |
| SNP_A.K_307150_2_7381999    | 2  | 7381999  | 2.35E-06 | 0.24582 | 299 | 0.152052219 | 0.004259464 |
| SNP_A.K_307451_2_7408539    | 2  | 7408539  | 2.35E-06 | 0.24247 | 299 | 0.152052173 | 0.004259464 |
| SNP_A.K_306732_2_7346355    | 2  | 7346355  | 2.35E-06 | 0.2408  | 299 | 0.152049997 | 0.004259464 |
| SNP_A.K_86565_1_11815553    | 1  | 11815553 | 2.38E-06 | 0.06522 | 299 | 0.151976496 | 0.004304359 |
| SNP_A.K_1005483_6_7016656   | 6  | 7016656  | 2.39E-06 | 0.29599 | 299 | 0.151952604 | 0.004315348 |
| SNP_A.K_307145_2_7381643    | 2  | 7381643  | 2.39E-06 | 0.24247 | 299 | 0.15194728  | 0.004315348 |
| SNP_A.K_978660_6_1751310    | 6  | 1751310  | 2.39E-06 | 0.27592 | 299 | 0.151942515 | 0.004315348 |
| SNP_A.K_978630_6_1747678    | 6  | 1747678  | 2.39E-06 | 0.28595 | 299 | 0.151937538 | 0.004315348 |
| SNP_A.K_1004204_6_6847599   | 6  | 6847599  | 2.40E-06 | 0.29599 | 299 | 0.15191918  | 0.004321094 |
| SNP_A.K_497656_3_5537385    | 3  | 5537385  | 2.40E-06 | 0.03846 | 299 | 0.151917727 | 0.004321094 |
| SNP_A.K_1004217_6_6849914   | 6  | 6849914  | 2.41E-06 | 0.31773 | 299 | 0.151908054 | 0.004323819 |
| SNP_A.K_978627_6_1746820    | 6  | 1746820  | 2.43E-06 | 0.26589 | 299 | 0.151853506 | 0.004356652 |
| SNP_A.K_1503487_9_1028218   | 9  | 1028218  | 2.44E-06 | 0.04515 | 299 | 0.151824603 | 0.00437238  |
| SNP_A.K_1005268_6_7001638   | 6  | 7001638  | 2.44E-06 | 0.27926 | 299 | 0.151815501 | 0.004373168 |
| SNP_A.K_978717_6_1771029    | 6  | 1771029  | 2.44E-06 | 0.38963 | 299 | 0.151812289 | 0.004373168 |
| SNP_A.K_1004791_6_6932852   | 6  | 6932852  | 2.45E-06 | 0.29933 | 299 | 0.151799913 | 0.004377772 |
| SNP_A.K_307273_2_7390634    | 2  | 7390634  | 2.45E-06 | 0.25084 | 299 | 0.151793119 | 0.004378605 |
| SNP_A.K_1830661_11_10573117 | 11 | 10573117 | 2.45E-06 | 0.16221 | 299 | 0.151786284 | 0.00437947  |
| SNP_A.K_995253_6_5921522    | 6  | 5921522  | 2.46E-06 | 0.12375 | 299 | 0.151773251 | 0.004384536 |
| SNP_A.K_306861_2_7361400    | 2  | 7361400  | 2.47E-06 | 0.26421 | 299 | 0.151743021 | 0.004401292 |
| SNP_A.K_978959_6_1831190    | 6  | 1831190  | 2.47E-06 | 0.3311  | 299 | 0.151736866 | 0.004401709 |
| SNP_A.K_990344_6_4711747    | 6  | 4711747  | 2.49E-06 | 0.20736 | 299 | 0.1516765   | 0.004435372 |
| SNP_A.K_990345_6_4711750    | 6  | 4711750  | 2.49E-06 | 0.20736 | 299 | 0.1516765   | 0.004435372 |
| SNP_A.K_690542_4_4448925    | 4  | 4448925  | 2.50E-06 | 0.0301  | 299 | 0.151669334 | 0.004436495 |
| SNP_A.K_1364999_8_6065775   | 8  | 6065775  | 2.51E-06 | 0.04515 | 299 | 0.15164175  | 0.004451649 |
| SNP_A.K_196625_1_31452357   | 1  | 31452357 | 2.52E-06 | 0.47324 | 299 | 0.151616014 | 0.004465582 |
| SNP_A.K_710042_4_8311970    | 4  | 8311970  | 2.52E-06 | 0.07525 | 299 | 0.151599341 | 0.004468043 |
| SNP_A.K_978637_6_1748297    | 6  | 1748297  | 2.52E-06 | 0.2893  | 299 | 0.151598537 | 0.004468043 |
| SNP_A.K_197054_1_31549174   | 1  | 31549174 | 2.52E-06 | 0.02676 | 299 | 0.151595925 | 0.004468043 |
| SNP_A.K_1005027_6_6962917   | 6  | 6962917  | 2.55E-06 | 0.31773 | 299 | 0.151532671 | 0.004508112 |
| SNP_A.K_1602090_9_19122093  | 9  | 19122093 | 2.56E-06 | 0.11706 | 299 | 0.151517647 | 0.004514759 |
| SNP_A.K_194653_1_30906130   | 1  | 30906130 | 2.56E-06 | 0.49498 | 299 | 0.151505635 | 0.004519314 |
| SNP_A.K_977945_6_1623530    | 6  | 1623530  | 2.57E-06 | 0.18227 | 299 | 0.151484021 | 0.004530598 |
| SNP_A.K_999571_6_6296890    | 6  | 6296890  | 2.58E-06 | 0.13545 | 299 | 0.151466142 | 0.004539292 |
| SNP_A.K_1005537_6_7020016   | 6  | 7020016  | 2.58E-06 | 0.30936 | 299 | 0.151459003 | 0.00454046  |
| SNP_A.K_1608677_9_20815201  | 9  | 20815201 | 2.59E-06 | 0.24247 | 299 | 0.151434542 | 0.004553811 |
| SNP_A.K_1004692_6_6918929   | 6  | 6918929  | 2.59E-06 | 0.38462 | 299 | 0.151426881 | 0.004554046 |
| SNP_A.K_306718_2_7345002    | 2  | 7345002  | 2.59E-06 | 0.26923 | 299 | 0.151423283 | 0.004554046 |
| SNP_A.K_307056_2_7376283    | 2  | 7376283  | 2.61E-06 | 0.2408  | 299 | 0.151377902 | 0.004582247 |
| SNP_A.K_326915_2_10070580   | 2  | 10070580 | 2.62E-06 | 0.05686 | 299 | 0.151365369 | 0.004587268 |
| SNP_A.K_307149_2_7381995    | 2  | 7381995  | 2.63E-06 | 0.24582 | 299 | 0.151333411 | 0.004606113 |
| SNP_A.K_978020_6_1638628    | 6  | 1638628  | 2.63E-06 | 0.16221 | 299 | 0.151319482 | 0.004610211 |
| SNP_A.K_307283_2_7391152    | 2  | 7391152  | 2.64E-06 | 0.24247 | 299 | 0.151316782 | 0.004610211 |
| SNP_A.K_691232_4_4563130    | 4  | 4563130  | 2.65E-06 | 0.07191 | 299 | 0.151293218 | 0.004618452 |
| SNP_A.K_308299_2_7489138    | 2  | 7489138  | 2.65E-06 | 0.21572 | 299 | 0.151290428 | 0.004618452 |
| SNP_A.K_1001335_6_6466173   | 6  | 6466173  | 2.65E-06 | 0.29097 | 299 | 0.151288952 | 0.004618452 |
| SNP_A.K_1364934_8_6060307   | 8  | 6060307  | 2.67E-06 | 0.07692 | 299 | 0.151239516 | 0.004649999 |
| SNP_A.K_195534_1_31223799   | 1  | 31223799 | 2.68E-06 | 0.48328 | 299 | 0.151198603 | 0.004674968 |



|                            |   |          |          |         |     |             |             |
|----------------------------|---|----------|----------|---------|-----|-------------|-------------|
| SNP_A.K_977994_6_1633040   | 6 | 1633040  | 2.69E-06 | 0.16054 | 299 | 0.15119407  | 0.004674968 |
| SNP_A.K_1433081_8_16617048 | 8 | 16617048 | 2.69E-06 | 0.08361 | 299 | 0.151174379 | 0.00468531  |
| SNP_A.K_729659_4_12624469  | 4 | 12624469 | 2.71E-06 | 0.22408 | 299 | 0.151134312 | 0.004710502 |
| SNP_A.K_561038_3_17749930  | 3 | 17749930 | 2.72E-06 | 0.20903 | 299 | 0.151109365 | 0.004724771 |
| SNP_A.K_1371159_8_7804028  | 8 | 7804028  | 2.73E-06 | 0.01839 | 299 | 0.151100747 | 0.004727131 |
| SNP_A.K_1004009_6_6815691  | 6 | 6815691  | 2.73E-06 | 0.29431 | 299 | 0.15108966  | 0.004731303 |
| SNP_A.K_1004016_6_6818321  | 6 | 6818321  | 2.74E-06 | 0.301   | 299 | 0.151059846 | 0.004749221 |
| SNP_A.K_307393_2_7400764   | 2 | 7400764  | 2.75E-06 | 0.2408  | 299 | 0.151048531 | 0.004753586 |
| SNP_A.K_978457_6_1694922   | 6 | 1694922  | 2.75E-06 | 0.26756 | 299 | 0.151030736 | 0.004757008 |
| SNP_A.K_990236_6_4701817   | 6 | 4701817  | 2.76E-06 | 0.19398 | 299 | 0.151030235 | 0.004757008 |
| SNP_A.K_1600941_9_18863472 | 9 | 18863472 | 2.76E-06 | 0.13211 | 299 | 0.15102778  | 0.004757008 |
| SNP_A.K_990378_6_4712741   | 6 | 4712741  | 2.76E-06 | 0.19231 | 299 | 0.151009905 | 0.004766229 |
| SNP_A.K_978777_6_1780110   | 6 | 1780110  | 2.77E-06 | 0.30936 | 299 | 0.151004541 | 0.004766238 |
| SNP_A.K_534170_3_12412541  | 3 | 12412541 | 2.79E-06 | 0.02676 | 299 | 0.150939909 | 0.004807055 |
| SNP_A.K_1364835_8_6047734  | 8 | 6047734  | 2.80E-06 | 0.10368 | 299 | 0.15093417  | 0.004807055 |
| SNP_A.K_992969_6_5691412   | 6 | 5691412  | 2.80E-06 | 0.22742 | 299 | 0.150933396 | 0.004807055 |
| SNP_A.K_990244_6_4702916   | 6 | 4702916  | 2.82E-06 | 0.21405 | 299 | 0.150889613 | 0.004831929 |
| SNP_A.K_374685_2_17872020  | 2 | 17872020 | 2.82E-06 | 0.06355 | 299 | 0.150889376 | 0.004831929 |
| SNP_A.K_1004223_6_6851230  | 6 | 6851230  | 2.82E-06 | 0.32441 | 299 | 0.150877085 | 0.004837141 |
| SNP_A.K_307513_2_7414680   | 2 | 7414680  | 2.83E-06 | 0.24415 | 299 | 0.150855167 | 0.00484958  |
| SNP_A.K_1004695_6_6918963  | 6 | 6918963  | 2.84E-06 | 0.36455 | 299 | 0.150835329 | 0.004860491 |
| SNP_A.K_306804_2_7352438   | 2 | 7352438  | 2.86E-06 | 0.2408  | 299 | 0.150798449 | 0.004884294 |
| SNP_A.K_1005416_6_7013002  | 6 | 7013002  | 2.86E-06 | 0.35786 | 299 | 0.150788392 | 0.004887886 |
| SNP_A.K_1004060_6_6822590  | 6 | 6822590  | 2.86E-06 | 0.29599 | 299 | 0.150780036 | 0.004890196 |
| SNP_A.K_306842_2_7359415   | 2 | 7359415  | 2.87E-06 | 0.25418 | 299 | 0.150768268 | 0.004891681 |
| SNP_A.K_306904_2_7364811   | 2 | 7364811  | 2.87E-06 | 0.25585 | 299 | 0.150767482 | 0.004891681 |
| SNP_A.K_1005371_6_7009948  | 6 | 7009948  | 2.88E-06 | 0.23746 | 299 | 0.150753505 | 0.004898263 |
| SNP_A.K_1364851_8_6048892  | 8 | 6048892  | 2.89E-06 | 0.11873 | 299 | 0.150712025 | 0.00492578  |
| SNP_A.K_977979_6_1628422   | 6 | 1628422  | 2.90E-06 | 0.23746 | 299 | 0.15070483  | 0.004927241 |
| SNP_A.K_977966_6_1626063   | 6 | 1626063  | 2.92E-06 | 0.16722 | 299 | 0.150654012 | 0.004953042 |
| SNP_A.K_709696_4_8281788   | 4 | 8281788  | 2.92E-06 | 0.09197 | 299 | 0.150651848 | 0.004953042 |
| SNP_A.K_978728_6_1771698   | 6 | 1771698  | 2.92E-06 | 0.35452 | 299 | 0.150648006 | 0.004953042 |
| SNP_A.K_307047_2_7375132   | 2 | 7375132  | 2.92E-06 | 0.23746 | 299 | 0.150645026 | 0.004953042 |
| SNP_A.K_307448_2_7408166   | 2 | 7408166  | 2.93E-06 | 0.26589 | 299 | 0.150641439 | 0.004953042 |
| SNP_A.K_1005205_6_6994413  | 6 | 6994413  | 2.93E-06 | 0.30769 | 299 | 0.150637069 | 0.004953042 |
| SNP_A.K_523315_3_10296571  | 3 | 10296571 | 2.93E-06 | 0.22074 | 299 | 0.150634249 | 0.004953042 |
| SNP_A.K_978414_6_1688826   | 6 | 1688826  | 2.94E-06 | 0.26254 | 299 | 0.150613379 | 0.004965036 |
| SNP_A.K_307346_2_7398170   | 2 | 7398170  | 2.94E-06 | 0.2291  | 299 | 0.150604669 | 0.004967703 |
| SNP_A.K_709908_4_8301435   | 4 | 8301435  | 2.95E-06 | 0.06856 | 299 | 0.150590867 | 0.004974294 |
| SNP_A.K_1602099_9_19127183 | 9 | 19127183 | 2.95E-06 | 0.11204 | 299 | 0.150585531 | 0.004974374 |
| SNP_A.K_1001121_6_6447982  | 6 | 6447982  | 2.97E-06 | 0.3796  | 299 | 0.150537211 | 0.005007671 |
| SNP_A.K_1364832_8_6047589  | 8 | 6047589  | 2.98E-06 | 0.10702 | 299 | 0.150525526 | 0.005012684 |
| SNP_A.K_723291_4_11429838  | 4 | 11429838 | 2.99E-06 | 0.0602  | 299 | 0.150510785 | 0.005020079 |
| SNP_A.K_1608678_9_20815241 | 9 | 20815241 | 2.99E-06 | 0.25418 | 299 | 0.150497426 | 0.005026413 |
| SNP_A.K_991211_6_4870675   | 6 | 4870675  | 3.04E-06 | 0.05518 | 299 | 0.150394047 | 0.005103403 |
| SNP_A.K_996049_6_5959426   | 6 | 5959426  | 3.04E-06 | 0.3194  | 299 | 0.150388439 | 0.005103721 |
| SNP_A.K_306841_2_7359409   | 2 | 7359409  | 3.05E-06 | 0.24749 | 299 | 0.150375474 | 0.005109861 |
| SNP_A.K_306851_2_7360244   | 2 | 7360244  | 3.05E-06 | 0.26923 | 299 | 0.15036613  | 0.005113143 |
| SNP_A.K_307168_2_7383136   | 2 | 7383136  | 3.08E-06 | 0.23746 | 299 | 0.150313638 | 0.005142444 |
| SNP_A.K_978101_6_1647188   | 6 | 1647188  | 3.08E-06 | 0.25251 | 299 | 0.150311453 | 0.005142444 |

|                             |    |          |          |         |     |             |             |
|-----------------------------|----|----------|----------|---------|-----|-------------|-------------|
| SNP_A.K_709828_4_8298974    | 4  | 8298974  | 3.08E-06 | 0.06689 | 299 | 0.150310042 | 0.005142444 |
| SNP_A.K_1005637_6_7032073   | 6  | 7032073  | 3.08E-06 | 0.29097 | 299 | 0.150305233 | 0.005142444 |
| SNP_A.K_1390041_8_10146158  | 8  | 10146158 | 3.08E-06 | 0.04348 | 299 | 0.150303313 | 0.005142444 |
| SNP_A.K_999070_6_6254457    | 6  | 6254457  | 3.09E-06 | 0.13712 | 299 | 0.150288538 | 0.005150099 |
| SNP_A.K_1364993_8_6065627   | 8  | 6065627  | 3.10E-06 | 0.11204 | 299 | 0.150267317 | 0.005162921 |
| SNP_A.K_306779_2_7349769    | 2  | 7349769  | 3.12E-06 | 0.23579 | 299 | 0.150228207 | 0.005186737 |
| SNP_A.K_328328_2_10222383   | 2  | 10222383 | 3.12E-06 | 0.08027 | 299 | 0.150227282 | 0.005186737 |
| SNP_A.K_1608610_9_20794181  | 9  | 20794181 | 3.14E-06 | 0.23244 | 299 | 0.150188307 | 0.005213981 |
| SNP_A.K_990276_6_4704269    | 6  | 4704269  | 3.15E-06 | 0.20736 | 299 | 0.150155779 | 0.005235278 |
| SNP_A.K_1608503_9_20765723  | 9  | 20765723 | 3.16E-06 | 0.28763 | 299 | 0.150151171 | 0.005235278 |
| SNP_A.K_1364921_8_6057127   | 8  | 6057127  | 3.16E-06 | 0.12207 | 299 | 0.150146557 | 0.005235278 |
| SNP_A.K_1004568_6_6906786   | 6  | 6906786  | 3.17E-06 | 0.29431 | 299 | 0.150133198 | 0.00524195  |
| SNP_A.K_2080286_12_27254632 | 12 | 27254632 | 3.17E-06 | 0.01003 | 299 | 0.150127404 | 0.005242487 |
| SNP_A.K_978635_6_1748121    | 6  | 1748121  | 3.20E-06 | 0.29766 | 299 | 0.150056452 | 0.005296223 |
| SNP_A.K_1364547_8_6021345   | 8  | 6021345  | 3.21E-06 | 0.08528 | 299 | 0.150046496 | 0.005300189 |
| SNP_A.K_997563_6_6109438    | 6  | 6109438  | 3.23E-06 | 0.14548 | 299 | 0.15000867  | 0.005326849 |
| SNP_A.K_1004343_6_6870262   | 6  | 6870262  | 3.23E-06 | 0.32107 | 299 | 0.150003593 | 0.005326849 |
| SNP_A.K_978118_6_1647773    | 6  | 1647773  | 3.23E-06 | 0.19064 | 299 | 0.149998766 | 0.005326849 |
| SNP_A.K_1830694_11_10574633 | 11 | 10574633 | 3.25E-06 | 0.35953 | 299 | 0.149956772 | 0.005357383 |
| SNP_A.K_709794_4_8297841    | 4  | 8297841  | 3.26E-06 | 0.06689 | 299 | 0.149947517 | 0.005360831 |
| SNP_A.K_978721_6_1771190    | 6  | 1771190  | 3.27E-06 | 0.3495  | 299 | 0.149932489 | 0.005369085 |
| SNP_A.K_1953710_12_3620597  | 12 | 3620597  | 3.27E-06 | 0.04013 | 299 | 0.149919969 | 0.005375267 |
| SNP_A.K_325798_2_9943355    | 2  | 9943355  | 3.28E-06 | 0.07023 | 299 | 0.1499125   | 0.005377248 |
| SNP_A.K_1005563_6_7025295   | 6  | 7025295  | 3.28E-06 | 0.26421 | 299 | 0.149901454 | 0.005382216 |
| SNP_A.K_994589_6_5874944    | 6  | 5874944  | 3.28E-06 | 0.25753 | 299 | 0.149894935 | 0.005383414 |
| SNP_A.K_1005892_6_7050571   | 6  | 7050571  | 3.30E-06 | 0.31271 | 299 | 0.149873983 | 0.005396674 |
| SNP_A.K_255301_1_41158313   | 1  | 41158313 | 3.30E-06 | 0.17057 | 299 | 0.149857555 | 0.005406178 |
| SNP_A.K_1005568_6_7025357   | 6  | 7025357  | 3.31E-06 | 0.2592  | 299 | 0.149841816 | 0.005415125 |
| SNP_A.K_306925_2_7368747    | 2  | 7368747  | 3.33E-06 | 0.24415 | 299 | 0.149804558 | 0.005440549 |
| SNP_A.K_306881_2_7363278    | 2  | 7363278  | 3.33E-06 | 0.25418 | 299 | 0.149801467 | 0.005440549 |
| SNP_A.K_1602020_9_19105955  | 9  | 19105955 | 3.34E-06 | 0.11204 | 299 | 0.149792474 | 0.005442815 |
| SNP_A.K_1004008_6_6815570   | 6  | 6815570  | 3.34E-06 | 0.30268 | 299 | 0.149788667 | 0.005442815 |
| SNP_A.K_1004226_6_6851854   | 6  | 6851854  | 3.34E-06 | 0.33445 | 299 | 0.149778304 | 0.00544642  |
| SNP_A.K_992435_6_5646433    | 6  | 5646433  | 3.35E-06 | 0.32609 | 299 | 0.1497743   | 0.00544642  |
| SNP_A.K_1000644_6_6403466   | 6  | 6403466  | 3.36E-06 | 0.29431 | 299 | 0.149748725 | 0.005463782 |
| SNP_A.K_978115_6_1647659    | 6  | 1647659  | 3.37E-06 | 0.199   | 299 | 0.149733598 | 0.005470246 |
| SNP_A.K_1390009_8_10145157  | 8  | 10145157 | 3.37E-06 | 0.04682 | 299 | 0.149731026 | 0.005470246 |
| SNP_A.K_1830676_11_10573745 | 11 | 10573745 | 3.38E-06 | 0.16221 | 299 | 0.149717808 | 0.005477194 |
| SNP_A.K_194268_1_30836704   | 1  | 30836704 | 3.40E-06 | 0.49331 | 299 | 0.149676786 | 0.005507843 |
| SNP_A.K_1608551_9_20776534  | 9  | 20776534 | 3.44E-06 | 0.23579 | 299 | 0.14959114  | 0.005577123 |
| SNP_A.K_1390036_8_10146095  | 8  | 10146095 | 3.47E-06 | 0.04682 | 299 | 0.149539866 | 0.005617268 |
| SNP_A.K_999393_6_6286280    | 6  | 6286280  | 3.48E-06 | 0.11538 | 299 | 0.149530181 | 0.005620997 |
| SNP_A.K_307495_2_7413016    | 2  | 7413016  | 3.48E-06 | 0.24247 | 299 | 0.149525564 | 0.005620997 |
| SNP_A.K_1364915_8_6056729   | 8  | 6056729  | 3.49E-06 | 0.11371 | 299 | 0.149495303 | 0.005639717 |
| SNP_A.K_1005562_6_7024873   | 6  | 7024873  | 3.50E-06 | 0.26923 | 299 | 0.149494117 | 0.005639717 |
| SNP_A.K_1005258_6_6999987   | 6  | 6999987  | 3.50E-06 | 0.25753 | 299 | 0.149478653 | 0.005648879 |
| SNP_A.K_709988_4_8304496    | 4  | 8304496  | 3.52E-06 | 0.07692 | 299 | 0.149440811 | 0.005677729 |
| SNP_A.K_308298_2_7489125    | 2  | 7489125  | 3.55E-06 | 0.21739 | 299 | 0.149397303 | 0.005711748 |
| SNP_A.K_1005467_6_7015374   | 6  | 7015374  | 3.56E-06 | 0.32107 | 299 | 0.149367912 | 0.00573341  |
| SNP_A.K_978729_6_1771713    | 6  | 1771713  | 3.57E-06 | 0.35786 | 299 | 0.149361755 | 0.005734456 |

|                             |    |          |          |         |     |             |             |
|-----------------------------|----|----------|----------|---------|-----|-------------|-------------|
| SNP_A.K_997491_6_6104256    | 6  | 6104256  | 3.57E-06 | 0.14548 | 299 | 0.149353104 | 0.005737726 |
| SNP_A.K_978770_6_1779076    | 6  | 1779076  | 3.58E-06 | 0.29431 | 299 | 0.14934668  | 0.005738293 |
| SNP_A.K_709963_4_8303718    | 4  | 8303718  | 3.58E-06 | 0.07692 | 299 | 0.149342525 | 0.005738293 |
| SNP_A.K_1004218_6_6850083   | 6  | 6850083  | 3.60E-06 | 0.30435 | 299 | 0.149304437 | 0.005766396 |
| SNP_A.K_978858_6_1788706    | 6  | 1788706  | 3.60E-06 | 0.31438 | 299 | 0.149301103 | 0.005766396 |
| SNP_A.K_990232_6_4701592    | 6  | 4701592  | 3.62E-06 | 0.20234 | 299 | 0.149270623 | 0.00578866  |
| SNP_A.K_978623_6_1745339    | 6  | 1745339  | 3.62E-06 | 0.27258 | 299 | 0.149266351 | 0.00578866  |
| SNP_A.K_1608604_9_20793807  | 9  | 20793807 | 3.63E-06 | 0.23244 | 299 | 0.149256434 | 0.00579204  |
| SNP_A.K_1004796_6_6933103   | 6  | 6933103  | 3.63E-06 | 0.31271 | 299 | 0.149242625 | 0.00579204  |
| SNP_A.K_1371520_8_7850808   | 8  | 7850808  | 3.63E-06 | 0.01839 | 299 | 0.149241246 | 0.00579204  |
| SNP_A.K_1001296_6_6463011   | 6  | 6463011  | 3.64E-06 | 0.3194  | 299 | 0.149238219 | 0.00579204  |
| SNP_A.K_978903_6_1799767    | 6  | 1799767  | 3.64E-06 | 0.32107 | 299 | 0.149237881 | 0.00579204  |
| SNP_A.K_1005644_6_7032880   | 6  | 7032880  | 3.66E-06 | 0.23746 | 299 | 0.1492016   | 0.005820278 |
| SNP_A.K_978608_6_1740753    | 6  | 1740753  | 3.67E-06 | 0.26421 | 299 | 0.149173697 | 0.00583676  |
| SNP_A.K_1004926_6_6953368   | 6  | 6953368  | 3.67E-06 | 0.30268 | 299 | 0.149173526 | 0.00583676  |
| SNP_A.K_978618_6_1744863    | 6  | 1744863  | 3.68E-06 | 0.29264 | 299 | 0.149165493 | 0.005839581 |
| SNP_A.K_1005298_6_7002963   | 6  | 7002963  | 3.71E-06 | 0.28261 | 299 | 0.149110974 | 0.005884699 |
| SNP_A.K_1005356_6_7008916   | 6  | 7008916  | 3.71E-06 | 0.30936 | 299 | 0.149104636 | 0.005885113 |
| SNP_A.K_307531_2_7416006    | 2  | 7416006  | 3.72E-06 | 0.25418 | 299 | 0.149100703 | 0.005885113 |
| SNP_A.K_1001163_6_6449922   | 6  | 6449922  | 3.72E-06 | 0.37625 | 299 | 0.149089772 | 0.00589062  |
| SNP_A.K_977877_6_1607061    | 6  | 1607061  | 3.73E-06 | 0.15719 | 299 | 0.149071169 | 0.0058999   |
| SNP_A.K_978939_6_1814581    | 6  | 1814581  | 3.73E-06 | 0.32441 | 299 | 0.149069835 | 0.0058999   |
| SNP_A.K_977899_6_1617097    | 6  | 1617097  | 3.75E-06 | 0.23746 | 299 | 0.14903704  | 0.005922667 |
| SNP_A.K_1004345_6_6870342   | 6  | 6870342  | 3.75E-06 | 0.32943 | 299 | 0.149035236 | 0.005922667 |
| SNP_A.K_307480_2_7410467    | 2  | 7410467  | 3.76E-06 | 0.28595 | 299 | 0.14901703  | 0.005934924 |
| SNP_A.K_1830741_11_10577127 | 11 | 10577127 | 3.78E-06 | 0.1204  | 299 | 0.148994008 | 0.005947825 |
| SNP_A.K_978818_6_1783773    | 6  | 1783773  | 3.78E-06 | 0.31271 | 299 | 0.148981158 | 0.005947825 |
| SNP_A.K_514070_3_8391504    | 3  | 8391504  | 3.79E-06 | 0.02676 | 299 | 0.148978676 | 0.005947825 |
| SNP_A.K_514018_3_8386416    | 3  | 8386416  | 3.79E-06 | 0.02676 | 299 | 0.148978676 | 0.005947825 |
| SNP_A.K_514106_3_8401030    | 3  | 8401030  | 3.79E-06 | 0.02676 | 299 | 0.148978676 | 0.005947825 |
| SNP_A.K_1830648_11_10572698 | 11 | 10572698 | 3.80E-06 | 0.1689  | 299 | 0.14895562  | 0.005962327 |
| SNP_A.K_978798_6_1782236    | 6  | 1782236  | 3.80E-06 | 0.29766 | 299 | 0.148953266 | 0.005962327 |
| SNP_A.K_1001509_6_6485667   | 6  | 6485667  | 3.82E-06 | 0.29431 | 299 | 0.148919888 | 0.005988782 |
| SNP_A.K_1390023_8_10145472  | 8  | 10145472 | 3.83E-06 | 0.05518 | 299 | 0.148908134 | 0.005995204 |
| SNP_A.K_978839_6_1787223    | 6  | 1787223  | 3.84E-06 | 0.34281 | 299 | 0.148888642 | 0.006004333 |
| SNP_A.K_978838_6_1787221    | 6  | 1787221  | 3.84E-06 | 0.34281 | 299 | 0.148888642 | 0.006004333 |
| SNP_A.K_978767_6_1777598    | 6  | 1777598  | 3.84E-06 | 0.30769 | 299 | 0.148879574 | 0.006005084 |
| SNP_A.K_990331_6_4710968    | 6  | 4710968  | 3.85E-06 | 0.20067 | 299 | 0.148878163 | 0.006005084 |
| SNP_A.K_1001092_6_6441019   | 6  | 6441019  | 3.87E-06 | 0.39465 | 299 | 0.148833275 | 0.006038642 |
| SNP_A.K_389622_2_19887350   | 2  | 19887350 | 3.87E-06 | 0.02843 | 299 | 0.148832603 | 0.006038642 |
| SNP_A.K_1608554_9_20776623  | 9  | 20776623 | 3.90E-06 | 0.23579 | 299 | 0.148795508 | 0.006063606 |
| SNP_A.K_997482_6_6103027    | 6  | 6103027  | 3.90E-06 | 0.13378 | 299 | 0.148791914 | 0.006063606 |
| SNP_A.K_1004649_6_6913565   | 6  | 6913565  | 3.90E-06 | 0.32609 | 299 | 0.148791568 | 0.006063606 |
| SNP_A.K_978612_6_1741229    | 6  | 1741229  | 3.91E-06 | 0.25251 | 299 | 0.148766125 | 0.006083057 |
| SNP_A.K_306854_2_7360517    | 2  | 7360517  | 3.93E-06 | 0.24415 | 299 | 0.148746202 | 0.006097348 |
| SNP_A.K_978887_6_1796552    | 6  | 1796552  | 3.94E-06 | 0.31104 | 299 | 0.148713979 | 0.006123358 |
| SNP_A.K_1003932_6_6806269   | 6  | 6806269  | 3.95E-06 | 0.32107 | 299 | 0.148703627 | 0.006128638 |
| SNP_A.K_710050_4_8312755    | 4  | 8312755  | 3.97E-06 | 0.08027 | 299 | 0.148673667 | 0.006152629 |
| SNP_A.K_709698_4_8282162    | 4  | 8282162  | 4.01E-06 | 0.09197 | 299 | 0.148608227 | 0.006210841 |
| SNP_A.K_1005610_6_7029780   | 6  | 7029780  | 4.04E-06 | 0.23913 | 299 | 0.148561337 | 0.00625158  |

|                             |    |          |          |         |     |             |             |
|-----------------------------|----|----------|----------|---------|-----|-------------|-------------|
| SNP_A.K_993964_6_5804126    | 6  | 5804126  | 4.07E-06 | 0.20569 | 299 | 0.148518942 | 0.0062882   |
| SNP_A.K_308303_2_7489534    | 2  | 7489534  | 4.09E-06 | 0.22074 | 299 | 0.148487406 | 0.00631099  |
| SNP_A.K_709945_4_8302688    | 4  | 8302688  | 4.09E-06 | 0.07692 | 299 | 0.148484524 | 0.00631099  |
| SNP_A.K_992437_6_5646455    | 6  | 5646455  | 4.09E-06 | 0.11371 | 299 | 0.148481314 | 0.00631099  |
| SNP_A.K_977867_6_1605358    | 6  | 1605358  | 4.10E-06 | 0.16221 | 299 | 0.148464551 | 0.006322756 |
| SNP_A.K_998751_6_6219656    | 6  | 6219656  | 4.12E-06 | 0.12542 | 299 | 0.148439601 | 0.006342607 |
| SNP_A.K_978864_6_1791845    | 6  | 1791845  | 4.14E-06 | 0.29097 | 299 | 0.14840563  | 0.006367871 |
| SNP_A.K_1000032_6_6342793   | 6  | 6342793  | 4.14E-06 | 0.14214 | 299 | 0.148404485 | 0.006367871 |
| SNP_A.K_709962_4_8303650    | 4  | 8303650  | 4.18E-06 | 0.08027 | 299 | 0.148345698 | 0.006421543 |
| SNP_A.K_306849_2_7360112    | 2  | 7360112  | 4.19E-06 | 0.25585 | 299 | 0.148328231 | 0.00643424  |
| SNP_A.K_1004613_6_6910734   | 6  | 6910734  | 4.23E-06 | 0.30602 | 299 | 0.148266784 | 0.006487225 |
| SNP_A.K_678622_4_991811     | 4  | 991811   | 4.23E-06 | 0.06522 | 299 | 0.148265949 | 0.006487225 |
| SNP_A.K_978013_6_1636356    | 6  | 1636356  | 4.24E-06 | 0.16722 | 299 | 0.1482475   | 0.006501056 |
| SNP_A.K_1001222_6_6455553   | 6  | 6455553  | 4.25E-06 | 0.28261 | 299 | 0.148238301 | 0.006505564 |
| SNP_A.K_990231_6_4701562    | 6  | 4701562  | 4.26E-06 | 0.199   | 299 | 0.148215726 | 0.006523622 |
| SNP_A.K_1830419_11_10560646 | 11 | 10560646 | 4.27E-06 | 0.15886 | 299 | 0.148198391 | 0.006536412 |
| SNP_A.K_1005357_6_7008937   | 6  | 7008937  | 4.29E-06 | 0.2893  | 299 | 0.1481762   | 0.006554174 |
| SNP_A.K_1433083_8_16617071  | 8  | 16617071 | 4.30E-06 | 0.08528 | 299 | 0.148161475 | 0.006564369 |
| SNP_A.K_1004041_6_6821331   | 6  | 6821331  | 4.32E-06 | 0.30268 | 299 | 0.148122342 | 0.006599567 |
| SNP_A.K_709944_4_8302621    | 4  | 8302621  | 4.33E-06 | 0.07692 | 299 | 0.148108988 | 0.006608432 |
| SNP_A.K_307079_2_7378017    | 2  | 7378017  | 4.35E-06 | 0.25418 | 299 | 0.148089447 | 0.006621818 |
| SNP_A.K_978837_6_1787217    | 6  | 1787217  | 4.35E-06 | 0.34783 | 299 | 0.148086546 | 0.006621818 |
| SNP_A.K_456488_2_33045330   | 2  | 33045330 | 4.35E-06 | 0.11706 | 299 | 0.148079765 | 0.006623955 |
| SNP_A.K_1365002_8_6065905   | 8  | 6065905  | 4.40E-06 | 0.0903  | 299 | 0.148015654 | 0.0066854   |
| SNP_A.K_1004592_6_6908932   | 6  | 6908932  | 4.40E-06 | 0.29097 | 299 | 0.148009374 | 0.006687043 |
| SNP_A.K_978621_6_1745281    | 6  | 1745281  | 4.41E-06 | 0.27592 | 299 | 0.147993941 | 0.006693937 |
| SNP_A.K_306729_2_7345940    | 2  | 7345940  | 4.41E-06 | 0.22575 | 299 | 0.14799336  | 0.006693937 |
| SNP_A.K_306777_2_7349731    | 2  | 7349731  | 4.42E-06 | 0.23244 | 299 | 0.147986823 | 0.006695861 |
| SNP_A.K_1000868_6_6421629   | 6  | 6421629  | 4.42E-06 | 0.3913  | 299 | 0.147976179 | 0.006701343 |
| SNP_A.K_978835_6_1787160    | 6  | 1787160  | 4.43E-06 | 0.3612  | 299 | 0.147972194 | 0.006701343 |
| SNP_A.K_978866_6_1792588    | 6  | 1792588  | 4.43E-06 | 0.29097 | 299 | 0.147963765 | 0.006705252 |
| SNP_A.K_1608594_9_20792063  | 9  | 20792063 | 4.44E-06 | 0.23077 | 299 | 0.147959086 | 0.006705257 |
| SNP_A.K_990343_6_4711721    | 6  | 4711721  | 4.46E-06 | 0.20569 | 299 | 0.147928433 | 0.006730877 |
| SNP_A.K_1500203_9_688602    | 9  | 688602   | 4.46E-06 | 0.03512 | 299 | 0.147925217 | 0.006730877 |
| SNP_A.K_1003991_6_6813686   | 6  | 6813686  | 4.47E-06 | 0.34615 | 299 | 0.147912533 | 0.006739274 |
| SNP_A.K_307285_2_7391278    | 2  | 7391278  | 4.48E-06 | 0.24415 | 299 | 0.147891428 | 0.006751928 |
| SNP_A.K_978789_6_1781572    | 6  | 1781572  | 4.49E-06 | 0.29431 | 299 | 0.14788415  | 0.006751928 |
| SNP_A.K_977968_6_1626348    | 6  | 1626348  | 4.49E-06 | 0.16054 | 299 | 0.147882104 | 0.006751928 |
| SNP_A.K_138883_1_21888564   | 1  | 21888564 | 4.49E-06 | 0.01003 | 299 | 0.147881848 | 0.006751928 |
| SNP_A.K_1005727_6_7035477   | 6  | 7035477  | 4.50E-06 | 0.28763 | 299 | 0.147861589 | 0.006763992 |
| SNP_A.K_306889_2_7363995    | 2  | 7363995  | 4.50E-06 | 0.26254 | 299 | 0.147861076 | 0.006763992 |
| SNP_A.K_1390016_8_10145390  | 8  | 10145390 | 4.51E-06 | 0.04515 | 299 | 0.147851824 | 0.006765476 |
| SNP_A.K_1788806_11_4375003  | 11 | 4375003  | 4.51E-06 | 0.02174 | 299 | 0.147847761 | 0.006765476 |
| SNP_A.K_306865_2_7361459    | 2  | 7361459  | 4.51E-06 | 0.25585 | 299 | 0.147845757 | 0.006765476 |
| SNP_A.K_306793_2_7351367    | 2  | 7351367  | 4.54E-06 | 0.26589 | 299 | 0.147816173 | 0.0067906   |
| SNP_A.K_1004818_6_6933986   | 6  | 6933986  | 4.54E-06 | 0.301   | 299 | 0.147812662 | 0.0067906   |
| SNP_A.K_1518103_9_3562346   | 9  | 3562346  | 4.55E-06 | 0.04515 | 299 | 0.147799853 | 0.006799249 |
| SNP_A.K_999706_6_6308329    | 6  | 6308329  | 4.56E-06 | 0.14548 | 299 | 0.147786517 | 0.006808471 |
| SNP_A.K_1781570_11_3218786  | 11 | 3218786  | 4.57E-06 | 0.04013 | 299 | 0.147767687 | 0.00682196  |
| SNP_A.K_1500114_9_680219    | 9  | 680219   | 4.57E-06 | 0.04013 | 299 | 0.14776456  | 0.00682196  |

|                             |    |          |          |         |     |             |             |
|-----------------------------|----|----------|----------|---------|-----|-------------|-------------|
| SNP_A.K_978412_6_1688287    | 6  | 1688287  | 4.58E-06 | 0.2592  | 299 | 0.147750546 | 0.006831944 |
| SNP_A.K_306736_2_7346730    | 2  | 7346730  | 4.59E-06 | 0.25251 | 299 | 0.147736109 | 0.006842397 |
| SNP_A.K_978458_6_1695357    | 6  | 1695357  | 4.61E-06 | 0.26087 | 299 | 0.147715712 | 0.006855656 |
| SNP_A.K_1005724_6_7035415   | 6  | 7035415  | 4.61E-06 | 0.2893  | 299 | 0.147714459 | 0.006855656 |
| SNP_A.K_525716_3_10766180   | 3  | 10766180 | 4.61E-06 | 0.01171 | 299 | 0.147705458 | 0.006860355 |
| SNP_A.K_306728_2_7345840    | 2  | 7345840  | 4.62E-06 | 0.25084 | 299 | 0.147696102 | 0.006865439 |
| SNP_A.K_195521_1_31221088   | 1  | 31221088 | 4.64E-06 | 0.47826 | 299 | 0.147663546 | 0.006891804 |
| SNP_A.K_957708_5_26977103   | 5  | 26977103 | 4.65E-06 | 0.02843 | 299 | 0.147662282 | 0.006891804 |
| SNP_A.K_307379_2_7399794    | 2  | 7399794  | 4.66E-06 | 0.25418 | 299 | 0.147635296 | 0.006915859 |
| SNP_A.K_1001218_6_6455370   | 6  | 6455370  | 4.69E-06 | 0.2893  | 299 | 0.147603329 | 0.006945381 |
| SNP_A.K_307322_2_7394997    | 2  | 7394997  | 4.70E-06 | 0.24749 | 299 | 0.147593031 | 0.006951566 |
| SNP_A.K_978675_6_1756071    | 6  | 1756071  | 4.73E-06 | 0.28428 | 299 | 0.14754406  | 0.006999739 |
| SNP_A.K_456493_2_33047430   | 2  | 33047430 | 4.74E-06 | 0.1204  | 299 | 0.147538798 | 0.007000495 |
| SNP_A.K_752094_4_17831574   | 4  | 17831574 | 4.76E-06 | 0.02007 | 299 | 0.147504895 | 0.007032514 |
| SNP_A.K_1433038_8_16614032  | 8  | 16614032 | 4.78E-06 | 0.08194 | 299 | 0.147484519 | 0.007049837 |
| SNP_A.K_1390020_8_10145451  | 8  | 10145451 | 4.80E-06 | 0.06355 | 299 | 0.147453822 | 0.007070131 |
| SNP_A.K_978894_6_1797551    | 6  | 1797551  | 4.80E-06 | 0.29766 | 299 | 0.147450594 | 0.007070131 |
| SNP_A.K_1004253_6_6854257   | 6  | 6854257  | 4.80E-06 | 0.09866 | 299 | 0.147448995 | 0.007070131 |
| SNP_A.K_710324_4_8336412    | 4  | 8336412  | 4.80E-06 | 0.08528 | 299 | 0.147447452 | 0.007070131 |
| SNP_A.K_673444_4_362125     | 4  | 362125   | 4.81E-06 | 0.12709 | 299 | 0.147443286 | 0.007070131 |
| SNP_A.K_1005469_6_7015473   | 6  | 7015473  | 4.82E-06 | 0.27926 | 299 | 0.147430243 | 0.007079488 |
| SNP_A.K_1005029_6_6962960   | 6  | 6962960  | 4.83E-06 | 0.30936 | 299 | 0.147408445 | 0.007098524 |
| SNP_A.K_1001105_6_6443114   | 6  | 6443114  | 4.84E-06 | 0.38963 | 299 | 0.147399607 | 0.007099374 |
| SNP_A.K_307478_2_7410068    | 2  | 7410068  | 4.84E-06 | 0.26756 | 299 | 0.147398549 | 0.007099374 |
| SNP_A.K_978411_6_1688271    | 6  | 1688271  | 4.84E-06 | 0.26087 | 299 | 0.147394081 | 0.007099374 |
| SNP_A.K_1004679_6_6916461   | 6  | 6916461  | 4.85E-06 | 0.31605 | 299 | 0.147381951 | 0.007107779 |
| SNP_A.K_1608643_9_20809184  | 9  | 20809184 | 4.90E-06 | 0.28261 | 299 | 0.147323619 | 0.007167539 |
| SNP_A.K_307279_2_7391069    | 2  | 7391069  | 4.91E-06 | 0.4097  | 299 | 0.147302709 | 0.007185844 |
| SNP_A.K_994712_6_5881760    | 6  | 5881760  | 4.94E-06 | 0.16722 | 299 | 0.147264541 | 0.007223572 |
| SNP_A.K_307516_2_7414902    | 2  | 7414902  | 4.95E-06 | 0.2408  | 299 | 0.147257038 | 0.007226936 |
| SNP_A.K_1608749_9_20829793  | 9  | 20829793 | 4.96E-06 | 0.24415 | 299 | 0.147245469 | 0.007234881 |
| SNP_A.K_1002066_6_6539233   | 6  | 6539233  | 4.96E-06 | 0.31773 | 299 | 0.147237108 | 0.007239224 |
| SNP_A.K_1004714_6_6924931   | 6  | 6924931  | 4.98E-06 | 0.32609 | 299 | 0.147220566 | 0.007252801 |
| SNP_A.K_307376_2_7399758    | 2  | 7399758  | 4.98E-06 | 0.25251 | 299 | 0.147216031 | 0.007252843 |
| SNP_A.K_1004193_6_6844944   | 6  | 6844944  | 5.00E-06 | 0.301   | 299 | 0.147184703 | 0.00727822  |
| SNP_A.K_908260_5_17494874   | 5  | 17494874 | 5.00E-06 | 0.01839 | 299 | 0.147184601 | 0.00727822  |
| SNP_A.K_977906_6_1619467    | 6  | 1619467  | 5.01E-06 | 0.24247 | 299 | 0.147176511 | 0.0072823   |
| SNP_A.K_1001239_6_6457018   | 6  | 6457018  | 5.02E-06 | 0.3913  | 299 | 0.147164852 | 0.007289571 |
| SNP_A.K_726725_4_12038546   | 4  | 12038546 | 5.02E-06 | 0.07023 | 299 | 0.147161132 | 0.007289571 |
| SNP_A.K_1390012_8_10145235  | 8  | 10145235 | 5.05E-06 | 0.04849 | 299 | 0.14712883  | 0.007321206 |
| SNP_A.K_978055_6_1644446    | 6  | 1644446  | 5.06E-06 | 0.19398 | 299 | 0.147115028 | 0.007331841 |
| SNP_A.K_1608501_9_20765517  | 9  | 20765517 | 5.07E-06 | 0.30435 | 299 | 0.147099307 | 0.007339744 |
| SNP_A.K_1001165_6_6450074   | 6  | 6450074  | 5.07E-06 | 0.39632 | 299 | 0.147099165 | 0.007339744 |
| SNP_A.K_1004171_6_6840823   | 6  | 6840823  | 5.08E-06 | 0.30602 | 299 | 0.147086897 | 0.007348663 |
| SNP_A.K_1726582_10_16600979 | 10 | 16600979 | 5.11E-06 | 0.05853 | 299 | 0.147053665 | 0.007381644 |
| SNP_A.K_1001595_6_6496375   | 6  | 6496375  | 5.12E-06 | 0.29431 | 299 | 0.147031451 | 0.007402075 |
| SNP_A.K_997768_6_6145949    | 6  | 6145949  | 5.13E-06 | 0.15886 | 299 | 0.147021047 | 0.007408455 |
| SNP_A.K_1830670_11_10573397 | 11 | 10573397 | 5.14E-06 | 0.34615 | 299 | 0.147017007 | 0.007408455 |
| SNP_A.K_760943_4_19823560   | 4  | 19823560 | 5.17E-06 | 0.01003 | 299 | 0.146977118 | 0.007449439 |
| SNP_A.K_307402_2_7401363    | 2  | 7401363  | 5.19E-06 | 0.24916 | 299 | 0.146943653 | 0.007483171 |

|                             |    |          |          |         |     |             |             |
|-----------------------------|----|----------|----------|---------|-----|-------------|-------------|
| SNP_A.K_978731_6_1771843    | 6  | 1771843  | 5.21E-06 | 0.30268 | 299 | 0.146929978 | 0.007491416 |
| SNP_A.K_306715_2_7344401    | 2  | 7344401  | 5.21E-06 | 0.24916 | 299 | 0.146924342 | 0.007491416 |
| SNP_A.K_1003988_6_6812535   | 6  | 6812535  | 5.21E-06 | 0.37458 | 299 | 0.146923259 | 0.007491416 |
| SNP_A.K_1608627_9_20803563  | 9  | 20803563 | 5.23E-06 | 0.28261 | 299 | 0.146904365 | 0.007508301 |
| SNP_A.K_978941_6_1814778    | 6  | 1814778  | 5.26E-06 | 0.3194  | 299 | 0.146862348 | 0.007552372 |
| SNP_A.K_1261281_7_17331377  | 7  | 17331377 | 5.27E-06 | 0.01338 | 299 | 0.146856974 | 0.007553484 |
| SNP_A.K_1001226_6_6455942   | 6  | 6455942  | 5.27E-06 | 0.28595 | 299 | 0.146850729 | 0.007555626 |
| SNP_A.K_990355_6_4712248    | 6  | 4712248  | 5.28E-06 | 0.19565 | 299 | 0.146835385 | 0.007568488 |
| SNP_A.K_1005358_6_7008950   | 6  | 7008950  | 5.31E-06 | 0.24415 | 299 | 0.146797234 | 0.007608349 |
| SNP_A.K_306769_2_7349058    | 2  | 7349058  | 5.32E-06 | 0.25251 | 299 | 0.146787471 | 0.0076125   |
| SNP_A.K_307528_2_7415763    | 2  | 7415763  | 5.32E-06 | 0.2408  | 299 | 0.146784905 | 0.0076125   |
| SNP_A.K_996253_6_5977236    | 6  | 5977236  | 5.37E-06 | 0.31271 | 299 | 0.14673521  | 0.007666378 |
| SNP_A.K_726096_4_11913307   | 4  | 11913307 | 5.38E-06 | 0.09197 | 299 | 0.146721169 | 0.007677892 |
| SNP_A.K_308579_2_7527594    | 2  | 7527594  | 5.38E-06 | 0.23077 | 299 | 0.146712853 | 0.007682574 |
| SNP_A.K_1001094_6_6441068   | 6  | 6441068  | 5.39E-06 | 0.38796 | 299 | 0.14670278  | 0.007689366 |
| SNP_A.K_1830655_11_10572967 | 11 | 10572967 | 5.40E-06 | 0.3495  | 299 | 0.146695996 | 0.007692227 |
| SNP_A.K_1830732_11_10576194 | 11 | 10576194 | 5.43E-06 | 0.20569 | 299 | 0.146654972 | 0.00773624  |
| SNP_A.K_307127_2_7380892    | 2  | 7380892  | 5.46E-06 | 0.26589 | 299 | 0.146618741 | 0.007774705 |
| SNP_A.K_1830645_11_10572636 | 11 | 10572636 | 5.47E-06 | 0.35117 | 299 | 0.146613155 | 0.007776158 |
| SNP_A.K_1390366_8_10192958  | 8  | 10192958 | 5.48E-06 | 0.06522 | 299 | 0.146601935 | 0.007784444 |
| SNP_A.K_1004207_6_6848565   | 6  | 6848565  | 5.48E-06 | 0.30435 | 299 | 0.146594834 | 0.007787744 |
| SNP_A.K_1432028_8_16445400  | 8  | 16445400 | 5.52E-06 | 0.07191 | 299 | 0.146548814 | 0.007837392 |
| SNP_A.K_1004634_6_6912599   | 6  | 6912599  | 5.53E-06 | 0.27592 | 299 | 0.146545289 | 0.007837392 |
| SNP_A.K_1001127_6_6448295   | 6  | 6448295  | 5.54E-06 | 0.28261 | 299 | 0.146528844 | 0.007850572 |
| SNP_A.K_978902_6_1799753    | 6  | 1799753  | 5.54E-06 | 0.3194  | 299 | 0.146525764 | 0.007850572 |
| SNP_A.K_978116_6_1647676    | 6  | 1647676  | 5.59E-06 | 0.19398 | 299 | 0.146468439 | 0.007913052 |
| SNP_A.K_990377_6_4712728    | 6  | 4712728  | 5.60E-06 | 0.19732 | 299 | 0.146464584 | 0.007913052 |
| SNP_A.K_308126_2_7474982    | 2  | 7474982  | 5.60E-06 | 0.17057 | 299 | 0.146461799 | 0.007913052 |
| SNP_A.K_1005183_6_6989633   | 6  | 6989633  | 5.61E-06 | 0.25418 | 299 | 0.146447921 | 0.007924801 |
| SNP_A.K_978825_6_1785875    | 6  | 1785875  | 5.65E-06 | 0.29766 | 299 | 0.146407964 | 0.007964869 |
| SNP_A.K_990332_6_4711168    | 6  | 4711168  | 5.65E-06 | 0.20067 | 299 | 0.146406853 | 0.007964869 |
| SNP_A.K_978210_6_1661287    | 6  | 1661287  | 5.66E-06 | 0.17057 | 299 | 0.146392792 | 0.007976934 |
| SNP_A.K_307082_2_7378311    | 2  | 7378311  | 5.68E-06 | 0.24582 | 299 | 0.146374509 | 0.007994281 |
| SNP_A.K_307287_2_7391370    | 2  | 7391370  | 5.70E-06 | 0.24415 | 299 | 0.146349124 | 0.008016194 |
| SNP_A.K_1390256_8_10167379  | 8  | 10167379 | 5.70E-06 | 0.05017 | 299 | 0.146344593 | 0.008016194 |
| SNP_A.K_307403_2_7401413    | 2  | 7401413  | 5.70E-06 | 0.24749 | 299 | 0.146343932 | 0.008016194 |
| SNP_A.K_1005536_6_7019983   | 6  | 7019983  | 5.71E-06 | 0.24916 | 299 | 0.146338525 | 0.008017538 |
| SNP_A.K_306712_2_7343155    | 2  | 7343155  | 5.73E-06 | 0.27592 | 299 | 0.146316276 | 0.008039736 |
| SNP_A.K_1001171_6_6450938   | 6  | 6450938  | 5.73E-06 | 0.28094 | 299 | 0.14631213  | 0.008039736 |
| SNP_A.K_1025193_6_10030439  | 6  | 10030439 | 5.78E-06 | 0.0301  | 299 | 0.146255807 | 0.008105158 |
| SNP_A.K_678621_4_991792     | 4  | 991792   | 5.79E-06 | 0.06689 | 299 | 0.14624915  | 0.008108112 |
| SNP_A.K_990371_6_4712607    | 6  | 4712607  | 5.79E-06 | 0.19732 | 299 | 0.146242394 | 0.008111196 |
| SNP_A.K_992708_6_5674853    | 6  | 5674853  | 5.84E-06 | 0.13211 | 299 | 0.14619382  | 0.008164029 |
| SNP_A.K_996311_6_5983227    | 6  | 5983227  | 5.84E-06 | 0.27759 | 299 | 0.146192118 | 0.008164029 |
| SNP_A.K_306920_2_7367120    | 2  | 7367120  | 5.87E-06 | 0.27926 | 299 | 0.146162794 | 0.008195928 |
| SNP_A.K_978609_6_1740760    | 6  | 1740760  | 5.87E-06 | 0.25418 | 299 | 0.146157699 | 0.008196939 |
| SNP_A.K_978936_6_1814161    | 6  | 1814161  | 5.89E-06 | 0.32776 | 299 | 0.146137691 | 0.008217034 |
| SNP_A.K_999409_6_6286620    | 6  | 6286620  | 5.90E-06 | 0.15886 | 299 | 0.146123073 | 0.008230264 |
| SNP_A.K_1004222_6_6851166   | 6  | 6851166  | 5.92E-06 | 0.33278 | 299 | 0.146102637 | 0.008247182 |
| SNP_A.K_1003935_6_6806403   | 6  | 6806403  | 5.92E-06 | 0.33278 | 299 | 0.146100597 | 0.008247182 |

|                             |    |          |          |         |     |             |             |
|-----------------------------|----|----------|----------|---------|-----|-------------|-------------|
| SNP_A.K_710027_4_8309642    | 4  | 8309642  | 5.93E-06 | 0.07023 | 299 | 0.146095085 | 0.008247182 |
| SNP_A.K_528009_3_11220328   | 3  | 11220328 | 5.93E-06 | 0.01171 | 299 | 0.146092738 | 0.008247182 |
| SNP_A.K_1005898_6_7050648   | 6  | 7050648  | 5.96E-06 | 0.28595 | 299 | 0.146066538 | 0.008275411 |
| SNP_A.K_990270_6_4703934    | 6  | 4703934  | 5.97E-06 | 0.2291  | 299 | 0.146053287 | 0.008286993 |
| SNP_A.K_1005403_6_7012406   | 6  | 7012406  | 6.02E-06 | 0.29933 | 299 | 0.14600063  | 0.008349096 |
| SNP_A.K_978476_6_1699399    | 6  | 1699399  | 6.03E-06 | 0.26254 | 299 | 0.145989765 | 0.008349096 |
| SNP_A.K_1004224_6_6851623   | 6  | 6851623  | 6.03E-06 | 0.33278 | 299 | 0.145986983 | 0.008349096 |
| SNP_A.K_1830617_11_10570973 | 11 | 10570973 | 6.03E-06 | 0.17224 | 299 | 0.145984344 | 0.008349096 |
| SNP_A.K_1001238_6_6457002   | 6  | 6457002  | 6.03E-06 | 0.38127 | 299 | 0.145984018 | 0.008349096 |
| SNP_A.K_1004387_6_6878844   | 6  | 6878844  | 6.04E-06 | 0.3311  | 299 | 0.145979783 | 0.008349096 |
| SNP_A.K_978401_6_1687237    | 6  | 1687237  | 6.06E-06 | 0.25585 | 299 | 0.145955965 | 0.008374598 |
| SNP_A.K_1001516_6_6486229   | 6  | 6486229  | 6.07E-06 | 0.301   | 299 | 0.145947386 | 0.008380244 |
| SNP_A.K_995339_6_5926600    | 6  | 5926600  | 6.08E-06 | 0.13378 | 299 | 0.145938314 | 0.008386543 |
| SNP_A.K_978668_6_1752902    | 6  | 1752902  | 6.10E-06 | 0.28763 | 299 | 0.145916632 | 0.008404843 |
| SNP_A.K_1001704_6_6507129   | 6  | 6507129  | 6.10E-06 | 0.29431 | 299 | 0.145915837 | 0.008404843 |
| SNP_A.K_990370_6_4712590    | 6  | 4712590  | 6.14E-06 | 0.19732 | 299 | 0.145865836 | 0.008465032 |
| SNP_A.K_529113_3_11375408   | 3  | 11375408 | 6.17E-06 | 0.01171 | 299 | 0.145843577 | 0.008488852 |
| SNP_A.K_673216_4_336353     | 4  | 336353   | 6.19E-06 | 0.11204 | 299 | 0.145823236 | 0.008510197 |
| SNP_A.K_1005617_6_7030227   | 6  | 7030227  | 6.21E-06 | 0.24247 | 299 | 0.145798405 | 0.008537578 |
| SNP_A.K_389593_2_19885960   | 2  | 19885960 | 6.23E-06 | 0.02676 | 299 | 0.145779602 | 0.008557001 |
| SNP_A.K_1289457_7_22448833  | 7  | 22448833 | 6.27E-06 | 0.07358 | 299 | 0.145735103 | 0.00861092  |
| SNP_A.K_1004923_6_6952651   | 6  | 6952651  | 6.31E-06 | 0.33278 | 299 | 0.145690841 | 0.008664866 |
| SNP_A.K_306771_2_7349386    | 2  | 7349386  | 6.35E-06 | 0.23913 | 299 | 0.145652098 | 0.008711654 |
| SNP_A.K_977917_6_1621323    | 6  | 1621323  | 6.36E-06 | 0.17224 | 299 | 0.145641962 | 0.008719696 |
| SNP_A.K_978110_6_1647552    | 6  | 1647552  | 6.37E-06 | 0.17391 | 299 | 0.145631213 | 0.008728064 |
| SNP_A.K_1953760_12_3627401  | 12 | 3627401  | 6.38E-06 | 0.05518 | 299 | 0.14562738  | 0.008728064 |
| SNP_A.K_1602014_9_19103639  | 9  | 19103639 | 6.40E-06 | 0.12375 | 299 | 0.145609515 | 0.008746676 |
| SNP_A.K_1004329_6_6867306   | 6  | 6867306  | 6.40E-06 | 0.01171 | 299 | 0.145600266 | 0.008753555 |
| SNP_A.K_306720_2_7345201    | 2  | 7345201  | 6.42E-06 | 0.26421 | 299 | 0.145589914 | 0.008761953 |
| SNP_A.K_978437_6_1693594    | 6  | 1693594  | 6.43E-06 | 0.2709  | 299 | 0.145573981 | 0.008778002 |
| SNP_A.K_307392_2_7400563    | 2  | 7400563  | 6.47E-06 | 0.23077 | 299 | 0.145535574 | 0.008824978 |
| SNP_A.K_978747_6_1775018    | 6  | 1775018  | 6.50E-06 | 0.36455 | 299 | 0.145504948 | 0.008861447 |
| SNP_A.K_1001313_6_6464352   | 6  | 6464352  | 6.51E-06 | 0.28595 | 299 | 0.145494825 | 0.008868536 |
| SNP_A.K_978868_6_1793273    | 6  | 1793273  | 6.52E-06 | 0.32776 | 299 | 0.145488596 | 0.008868536 |
| SNP_A.K_1001533_6_6487629   | 6  | 6487629  | 6.52E-06 | 0.29766 | 299 | 0.145487246 | 0.008868536 |
| SNP_A.K_308316_2_7490145    | 2  | 7490145  | 6.52E-06 | 0.25585 | 299 | 0.145482568 | 0.008869216 |
| SNP_A.K_1601887_9_19087252  | 9  | 19087252 | 6.56E-06 | 0.1087  | 299 | 0.145450584 | 0.008896908 |
| SNP_A.K_1830739_11_10577097 | 11 | 10577097 | 6.56E-06 | 0.21906 | 299 | 0.145445531 | 0.008896908 |
| SNP_A.K_1005622_6_7030707   | 6  | 7030707  | 6.57E-06 | 0.24415 | 299 | 0.145439844 | 0.008896908 |
| SNP_A.K_1949539_12_2311934  | 12 | 2311934  | 6.57E-06 | 0.03512 | 299 | 0.145435135 | 0.008896908 |
| SNP_A.K_992476_6_5652202    | 6  | 5652202  | 6.58E-06 | 0.19565 | 299 | 0.145431457 | 0.008896908 |
| SNP_A.K_1004957_6_6957442   | 6  | 6957442  | 6.58E-06 | 0.34448 | 299 | 0.145431439 | 0.008896908 |
| SNP_A.K_1004935_6_6954996   | 6  | 6954996  | 6.58E-06 | 0.30435 | 299 | 0.145431017 | 0.008896908 |
| SNP_A.K_923814_5_19502484   | 5  | 19502484 | 6.58E-06 | 0.02007 | 299 | 0.145429196 | 0.008896908 |
| SNP_A.K_1004303_6_6864422   | 6  | 6864422  | 6.59E-06 | 0.39967 | 299 | 0.145415695 | 0.008904858 |
| SNP_A.K_456464_2_33040299   | 2  | 33040299 | 6.59E-06 | 0.12542 | 299 | 0.145413063 | 0.008904858 |
| SNP_A.K_999905_6_6332100    | 6  | 6332100  | 6.60E-06 | 0.19732 | 299 | 0.145408783 | 0.008904858 |
| SNP_A.K_2080297_12_27255245 | 12 | 27255245 | 6.60E-06 | 0.01171 | 299 | 0.145406842 | 0.008904858 |
| SNP_A.K_307144_2_7381532    | 2  | 7381532  | 6.66E-06 | 0.28261 | 299 | 0.145348518 | 0.008977098 |
| SNP_A.K_1390034_8_10146015  | 8  | 10146015 | 6.66E-06 | 0.04849 | 299 | 0.145346776 | 0.008977098 |

|                             |    |          |          |         |     |             |             |
|-----------------------------|----|----------|----------|---------|-----|-------------|-------------|
| SNP_A.K_1364900_8_6053953   | 8  | 6053953  | 6.67E-06 | 0.1087  | 299 | 0.145340417 | 0.008980201 |
| SNP_A.K_308610_2_7529549    | 2  | 7529549  | 6.68E-06 | 0.18896 | 299 | 0.145327669 | 0.008992271 |
| SNP_A.K_307215_2_7385328    | 2  | 7385328  | 6.70E-06 | 0.24582 | 299 | 0.145313046 | 0.009006998 |
| SNP_A.K_679299_4_1070800    | 4  | 1070800  | 6.72E-06 | 0.03177 | 299 | 0.145296604 | 0.009024315 |
| SNP_A.K_1001201_6_6454824   | 6  | 6454824  | 6.75E-06 | 0.29431 | 299 | 0.145268042 | 0.009058792 |
| SNP_A.K_690086_4_4403112    | 4  | 4403112  | 6.75E-06 | 0.05518 | 299 | 0.145260159 | 0.009062922 |
| SNP_A.K_307274_2_7390648    | 2  | 7390648  | 6.76E-06 | 0.27258 | 299 | 0.145256863 | 0.009062922 |
| SNP_A.K_1371150_8_7803778   | 8  | 7803778  | 6.79E-06 | 0.01003 | 299 | 0.145226104 | 0.009100682 |
| SNP_A.K_978899_6_1798773    | 6  | 1798773  | 6.80E-06 | 0.30268 | 299 | 0.145215281 | 0.009110206 |
| SNP_A.K_990407_6_4716115    | 6  | 4716115  | 6.83E-06 | 0.21405 | 299 | 0.145192036 | 0.009137448 |
| SNP_A.K_1123815_6_23600036  | 6  | 23600036 | 6.83E-06 | 0.01338 | 299 | 0.145184061 | 0.009142952 |
| SNP_A.K_990342_6_4711681    | 6  | 4711681  | 6.84E-06 | 0.20234 | 299 | 0.145175543 | 0.00914924  |
| SNP_A.K_1001182_6_6452751   | 6  | 6452751  | 6.85E-06 | 0.28428 | 299 | 0.14516527  | 0.009155586 |
| SNP_A.K_306750_2_7347644    | 2  | 7347644  | 6.86E-06 | 0.25418 | 299 | 0.145161327 | 0.009155586 |
| SNP_A.K_997638_6_6140248    | 6  | 6140248  | 6.86E-06 | 0.14883 | 299 | 0.145158773 | 0.009155586 |
| SNP_A.K_978940_6_1814671    | 6  | 1814671  | 6.88E-06 | 0.33612 | 299 | 0.145137824 | 0.009179697 |
| SNP_A.K_672676_4_269948     | 4  | 269948   | 6.89E-06 | 0.08027 | 299 | 0.145130114 | 0.009184872 |
| SNP_A.K_990379_6_4712788    | 6  | 4712788  | 6.90E-06 | 0.199   | 299 | 0.145121106 | 0.009191915 |
| SNP_A.K_1371622_8_7859409   | 8  | 7859409  | 6.92E-06 | 0.01338 | 299 | 0.145106962 | 0.009206348 |
| SNP_A.K_307530_2_7415968    | 2  | 7415968  | 6.94E-06 | 0.43478 | 299 | 0.14508854  | 0.009224231 |
| SNP_A.K_1001441_6_6481751   | 6  | 6481751  | 6.94E-06 | 0.30435 | 299 | 0.14508635  | 0.009224231 |
| SNP_A.K_997893_6_6155584    | 6  | 6155584  | 6.95E-06 | 0.14548 | 299 | 0.145079338 | 0.009228444 |
| SNP_A.K_1830667_11_10573250 | 11 | 10573250 | 6.99E-06 | 0.16221 | 299 | 0.145041616 | 0.009277046 |
| SNP_A.K_1004269_6_6858759   | 6  | 6858759  | 7.01E-06 | 0.3194  | 299 | 0.145023954 | 0.009296739 |
| SNP_A.K_710104_4_8315938    | 4  | 8315938  | 7.01E-06 | 0.08863 | 299 | 0.145019193 | 0.009297729 |
| SNP_A.K_306773_2_7349477    | 2  | 7349477  | 7.02E-06 | 0.25585 | 299 | 0.145010649 | 0.009304216 |
| SNP_A.K_1364925_8_6059013   | 8  | 6059013  | 7.03E-06 | 0.1204  | 299 | 0.145005168 | 0.009306261 |
| SNP_A.K_1005554_6_7024152   | 6  | 7024152  | 7.04E-06 | 0.27592 | 299 | 0.144991397 | 0.009319906 |
| SNP_A.K_1001213_6_6455233   | 6  | 6455233  | 7.05E-06 | 0.28763 | 299 | 0.144987646 | 0.009319906 |
| SNP_A.K_456443_2_33037266   | 2  | 33037266 | 7.07E-06 | 0.12542 | 299 | 0.144969297 | 0.009340718 |
| SNP_A.K_1004996_6_6960932   | 6  | 6960932  | 7.08E-06 | 0.32107 | 299 | 0.144960896 | 0.009347048 |
| SNP_A.K_1608608_9_20794082  | 9  | 20794082 | 7.11E-06 | 0.24916 | 299 | 0.144927901 | 0.00938468  |
| SNP_A.K_978779_6_1780142    | 6  | 1780142  | 7.11E-06 | 0.32441 | 299 | 0.14492705  | 0.00938468  |
| SNP_A.K_709946_4_8302690    | 4  | 8302690  | 7.13E-06 | 0.0786  | 299 | 0.144916787 | 0.009392312 |
| SNP_A.K_978012_6_1636252    | 6  | 1636252  | 7.13E-06 | 0.17391 | 299 | 0.144913736 | 0.009392312 |
| SNP_A.K_978099_6_1647177    | 6  | 1647177  | 7.13E-06 | 0.17224 | 299 | 0.144908887 | 0.009393484 |
| SNP_A.K_307348_2_7398308    | 2  | 7398308  | 7.14E-06 | 0.22742 | 299 | 0.144902896 | 0.009396335 |
| SNP_A.K_1005030_6_6963011   | 6  | 6963011  | 7.15E-06 | 0.32441 | 299 | 0.144895232 | 0.009401647 |
| SNP_A.K_1001535_6_6487891   | 6  | 6487891  | 7.16E-06 | 0.29933 | 299 | 0.144882289 | 0.009411635 |
| SNP_A.K_978831_6_1787037    | 6  | 1787037  | 7.17E-06 | 0.36789 | 299 | 0.144877436 | 0.009411635 |
| SNP_A.K_993148_6_5710593    | 6  | 5710593  | 7.17E-06 | 0.21405 | 299 | 0.144876314 | 0.009411635 |
| SNP_A.K_1433180_8_16622122  | 8  | 16622122 | 7.19E-06 | 0.08863 | 299 | 0.144862616 | 0.009425851 |
| SNP_A.K_978193_6_1659700    | 6  | 1659700  | 7.20E-06 | 0.25251 | 299 | 0.144853561 | 0.009429921 |
| SNP_A.K_995345_6_5927037    | 6  | 5927037  | 7.20E-06 | 0.22408 | 299 | 0.14485179  | 0.009429921 |
| SNP_A.K_710341_4_8336943    | 4  | 8336943  | 7.22E-06 | 0.07692 | 299 | 0.144828982 | 0.009455256 |
| SNP_A.K_673349_4_350462     | 4  | 350462   | 7.23E-06 | 0.14047 | 299 | 0.144826203 | 0.009455256 |
| SNP_A.K_709874_4_8300085    | 4  | 8300085  | 7.23E-06 | 0.06856 | 299 | 0.144822541 | 0.009455256 |
| SNP_A.K_994602_6_5875390    | 6  | 5875390  | 7.25E-06 | 0.27926 | 299 | 0.144809039 | 0.009469272 |
| SNP_A.K_307443_2_7407758    | 2  | 7407758  | 7.26E-06 | 0.25251 | 299 | 0.144797164 | 0.009480904 |
| SNP_A.K_978311_6_1672704    | 6  | 1672704  | 7.27E-06 | 0.1806  | 299 | 0.144784492 | 0.009493736 |



|                             |    |          |          |         |     |             |             |
|-----------------------------|----|----------|----------|---------|-----|-------------|-------------|
| SNP_A.K_1830674_11_10573648 | 11 | 10573648 | 7.29E-06 | 0.16221 | 299 | 0.144773088 | 0.009502701 |
| SNP_A.K_1433026_8_16611474  | 8  | 16611474 | 7.30E-06 | 0.08194 | 299 | 0.144763907 | 0.009502701 |
| SNP_A.K_999720_6_6309357    | 6  | 6309357  | 7.30E-06 | 0.11204 | 299 | 0.144761966 | 0.009502701 |
| SNP_A.K_709627_4_8278535    | 4  | 8278535  | 7.30E-06 | 0.08361 | 299 | 0.144761673 | 0.009502701 |
| SNP_A.K_978097_6_1647094    | 6  | 1647094  | 7.30E-06 | 0.17057 | 299 | 0.144758418 | 0.009502701 |
| SNP_A.K_1001140_6_6448787   | 6  | 6448787  | 7.32E-06 | 0.28763 | 299 | 0.144742347 | 0.009520381 |
| SNP_A.K_1788566_11_4353615  | 11 | 4353615  | 7.33E-06 | 0.01171 | 299 | 0.144738525 | 0.009520381 |
| SNP_A.K_306782_2_7350075    | 2  | 7350075  | 7.35E-06 | 0.2408  | 299 | 0.14471866  | 0.009544018 |
| SNP_A.K_997883_6_6155434    | 6  | 6155434  | 7.37E-06 | 0.14548 | 299 | 0.144698229 | 0.009568566 |
| SNP_A.K_1001291_6_6462734   | 6  | 6462734  | 7.38E-06 | 0.32274 | 299 | 0.144690886 | 0.009573581 |
| SNP_A.K_307087_2_7378353    | 2  | 7378353  | 7.41E-06 | 0.4097  | 299 | 0.144670341 | 0.009598085 |
| SNP_A.K_195475_1_31201552   | 1  | 31201552 | 7.41E-06 | 0.46656 | 299 | 0.144666557 | 0.009598085 |
| SNP_A.K_1000990_6_6434253   | 6  | 6434253  | 7.42E-06 | 0.33278 | 299 | 0.14466075  | 0.009600823 |
| SNP_A.K_977937_6_1622933    | 6  | 1622933  | 7.43E-06 | 0.16722 | 299 | 0.144652248 | 0.009602746 |
| SNP_A.K_307222_2_7386206    | 2  | 7386206  | 7.43E-06 | 0.2291  | 299 | 0.144651514 | 0.009602746 |
| SNP_A.K_978650_6_1750423    | 6  | 1750423  | 7.44E-06 | 0.29097 | 299 | 0.144641961 | 0.009604041 |
| SNP_A.K_978911_6_1803185    | 6  | 1803185  | 7.44E-06 | 0.32274 | 299 | 0.144639412 | 0.009604041 |
| SNP_A.K_977967_6_1626332    | 6  | 1626332  | 7.44E-06 | 0.24582 | 299 | 0.144638738 | 0.009604041 |
| SNP_A.K_1830769_11_10580048 | 11 | 10580048 | 7.45E-06 | 0.22241 | 299 | 0.144629706 | 0.009611647 |
| SNP_A.K_861107_5_3338604    | 5  | 3338604  | 7.48E-06 | 0.11037 | 299 | 0.144608984 | 0.009636852 |
| SNP_A.K_1005360_6_7009541   | 6  | 7009541  | 7.52E-06 | 0.25084 | 299 | 0.14457584  | 0.009680902 |
| SNP_A.K_977902_6_1618714    | 6  | 1618714  | 7.52E-06 | 0.24415 | 299 | 0.144568543 | 0.009685955 |
| SNP_A.K_997890_6_6155559    | 6  | 6155559  | 7.55E-06 | 0.14548 | 299 | 0.144544092 | 0.00971703  |
| SNP_A.K_306884_2_7363474    | 2  | 7363474  | 7.58E-06 | 0.26421 | 299 | 0.144519132 | 0.009748985 |
| SNP_A.K_457094_2_33254450   | 2  | 33254450 | 7.59E-06 | 0.02676 | 299 | 0.144510883 | 0.009755538 |
| SNP_A.K_306857_2_7360809    | 2  | 7360809  | 7.61E-06 | 0.23746 | 299 | 0.144497023 | 0.009770664 |
| SNP_A.K_1005047_6_6965191   | 6  | 6965191  | 7.62E-06 | 0.31104 | 299 | 0.144491239 | 0.009773472 |
| SNP_A.K_978786_6_1781213    | 6  | 1781213  | 7.62E-06 | 0.29599 | 299 | 0.144485172 | 0.009776716 |
| SNP_A.K_990368_6_4712581    | 6  | 4712581  | 7.64E-06 | 0.19732 | 299 | 0.144475143 | 0.009786025 |
| SNP_A.K_1004542_6_6898884   | 6  | 6898884  | 7.66E-06 | 0.30435 | 299 | 0.144453598 | 0.009811568 |
| SNP_A.K_306800_2_7351743    | 2  | 7351743  | 7.66E-06 | 0.2709  | 299 | 0.144450434 | 0.009811568 |
| SNP_A.K_1001680_6_6503208   | 6  | 6503208  | 7.67E-06 | 0.30435 | 299 | 0.144446659 | 0.009811568 |
| SNP_A.K_1004931_6_6954602   | 6  | 6954602  | 7.69E-06 | 0.30769 | 299 | 0.144431721 | 0.009821516 |
| SNP_A.K_978820_6_1784882    | 6  | 1784882  | 7.69E-06 | 0.35786 | 299 | 0.144427073 | 0.009821516 |
| SNP_A.K_401067_2_21817285   | 2  | 21817285 | 7.69E-06 | 0.05184 | 299 | 0.144426052 | 0.009821516 |
| SNP_A.K_1004622_6_6911174   | 6  | 6911174  | 7.70E-06 | 0.29264 | 299 | 0.144422823 | 0.009821516 |
| SNP_A.K_1001077_6_6439881   | 6  | 6439881  | 7.70E-06 | 0.29097 | 299 | 0.144417132 | 0.009821516 |
| SNP_A.K_1004597_6_6909152   | 6  | 6909152  | 7.71E-06 | 0.33445 | 299 | 0.144416628 | 0.009821516 |
| SNP_A.K_195007_1_31034367   | 1  | 31034367 | 7.71E-06 | 0.41973 | 299 | 0.144411884 | 0.009822788 |
| SNP_A.K_456490_2_33046782   | 2  | 33046782 | 7.82E-06 | 0.11538 | 299 | 0.144319535 | 0.009947679 |
| SNP_A.K_307523_2_7415150    | 2  | 7415150  | 7.83E-06 | 0.25251 | 299 | 0.144315733 | 0.009947679 |
| SNP_A.K_1001106_6_6443861   | 6  | 6443861  | 7.83E-06 | 0.28763 | 299 | 0.14431419  | 0.009947679 |
| SNP_A.K_1364901_8_6054078   | 8  | 6054078  | 7.83E-06 | 0.12375 | 299 | 0.144313183 | 0.009947679 |
| SNP_A.K_990381_6_4712821    | 6  | 4712821  | 7.83E-06 | 0.19565 | 299 | 0.144311526 | 0.009947679 |
| SNP_A.K_1608605_9_20793997  | 9  | 20793997 | 7.86E-06 | 0.24247 | 299 | 0.144290107 | 0.009974963 |
| SNP_A.K_306918_2_7366655    | 2  | 7366655  | 7.87E-06 | 0.26421 | 299 | 0.144284039 | 0.009978347 |
| SNP_A.K_326864_2_10061941   | 2  | 10061941 | 7.90E-06 | 0.06187 | 299 | 0.144257925 | 0.010007601 |
| SNP_A.K_978923_6_1804747    | 6  | 1804747  | 7.90E-06 | 0.31773 | 299 | 0.144256976 | 0.010007601 |
| SNP_A.K_1608591_9_20791532  | 9  | 20791532 | 7.90E-06 | 0.24247 | 299 | 0.144253635 | 0.010007601 |
| SNP_A.K_1608618_9_20800390  | 9  | 20800390 | 7.93E-06 | 0.23579 | 299 | 0.144234419 | 0.010024831 |

|                             |    |          |          |         |     |             |             |
|-----------------------------|----|----------|----------|---------|-----|-------------|-------------|
| SNP_A.K_1001113_6_6446295   | 6  | 6446295  | 7.93E-06 | 0.2893  | 299 | 0.144231039 | 0.010024831 |
| SNP_A.K_1001083_6_6440024   | 6  | 6440024  | 7.94E-06 | 0.29431 | 299 | 0.144228311 | 0.010024831 |
| SNP_A.K_1005214_6_6995083   | 6  | 6995083  | 7.94E-06 | 0.34114 | 299 | 0.144227093 | 0.010024831 |
| SNP_A.K_1001080_6_6439976   | 6  | 6439976  | 7.95E-06 | 0.28261 | 299 | 0.144214843 | 0.010034256 |
| SNP_A.K_978005_6_1634991    | 6  | 1634991  | 7.95E-06 | 0.17057 | 299 | 0.144213327 | 0.010034256 |
| SNP_A.K_978284_6_1668603    | 6  | 1668603  | 7.98E-06 | 0.24582 | 299 | 0.144195137 | 0.010056744 |
| SNP_A.K_307028_2_7373779    | 2  | 7373779  | 8.01E-06 | 0.25418 | 299 | 0.14416756  | 0.010094094 |
| SNP_A.K_709676_4_8280696    | 4  | 8280696  | 8.03E-06 | 0.10033 | 299 | 0.144153285 | 0.010110533 |
| SNP_A.K_978932_6_1808359    | 6  | 1808359  | 8.09E-06 | 0.32274 | 299 | 0.144105924 | 0.010178776 |
| SNP_A.K_977939_6_1623005    | 6  | 1623005  | 8.09E-06 | 0.1689  | 299 | 0.144102541 | 0.010178776 |
| SNP_A.K_1000853_6_6421185   | 6  | 6421185  | 8.12E-06 | 0.28595 | 299 | 0.14407824  | 0.010211219 |
| SNP_A.K_1782998_11_3531933  | 11 | 3531933  | 8.13E-06 | 0.01171 | 299 | 0.144074474 | 0.010211219 |
| SNP_A.K_994292_6_5839856    | 6  | 5839856  | 8.17E-06 | 0.24247 | 299 | 0.144044482 | 0.01024859  |
| SNP_A.K_194681_1_30914490   | 1  | 30914490 | 8.17E-06 | 0.49666 | 299 | 0.144043406 | 0.01024859  |
| SNP_A.K_752455_4_17906629   | 4  | 17906629 | 8.18E-06 | 0.04348 | 299 | 0.144030837 | 0.010262572 |
| SNP_A.K_978732_6_1771856    | 6  | 1771856  | 8.20E-06 | 0.30769 | 299 | 0.144018843 | 0.01026399  |
| SNP_A.K_307344_2_7397484    | 2  | 7397484  | 8.20E-06 | 0.23579 | 299 | 0.144018704 | 0.01026399  |
| SNP_A.K_307349_2_7398319    | 2  | 7398319  | 8.20E-06 | 0.22742 | 299 | 0.144018411 | 0.01026399  |
| SNP_A.K_977893_6_1616223    | 6  | 1616223  | 8.21E-06 | 0.24582 | 299 | 0.144011869 | 0.010268324 |
| SNP_A.K_201445_1_32182693   | 1  | 32182693 | 8.22E-06 | 0.16555 | 299 | 0.144005927 | 0.010269129 |
| SNP_A.K_1371280_8_7817601   | 8  | 7817601  | 8.22E-06 | 0.01338 | 299 | 0.144003689 | 0.010269129 |
| SNP_A.K_526307_3_10871057   | 3  | 10871057 | 8.23E-06 | 0.01171 | 299 | 0.14399429  | 0.010278069 |
| SNP_A.K_978207_6_1660474    | 6  | 1660474  | 8.25E-06 | 0.17726 | 299 | 0.143981078 | 0.010287446 |
| SNP_A.K_990369_6_4712588    | 6  | 4712588  | 8.25E-06 | 0.19732 | 299 | 0.143980796 | 0.010287446 |
| SNP_A.K_978238_6_1664035    | 6  | 1664035  | 8.26E-06 | 0.17391 | 299 | 0.143973003 | 0.010293827 |
| SNP_A.K_1001310_6_6463980   | 6  | 6463980  | 8.27E-06 | 0.28763 | 299 | 0.143964492 | 0.010301373 |
| SNP_A.K_990248_6_4703038    | 6  | 4703038  | 8.31E-06 | 0.20569 | 299 | 0.14393583  | 0.010341478 |
| SNP_A.K_978826_6_1786490    | 6  | 1786490  | 8.31E-06 | 0.35619 | 299 | 0.143931887 | 0.010341675 |
| SNP_A.K_978804_6_1782855    | 6  | 1782855  | 8.32E-06 | 0.33612 | 299 | 0.143922445 | 0.010350158 |
| SNP_A.K_1000923_6_6424119   | 6  | 6424119  | 8.33E-06 | 0.32943 | 299 | 0.143916573 | 0.010350158 |
| SNP_A.K_978934_6_1813106    | 6  | 1813106  | 8.34E-06 | 0.33612 | 299 | 0.143913286 | 0.010350158 |
| SNP_A.K_1830420_11_10560666 | 11 | 10560666 | 8.34E-06 | 0.15552 | 299 | 0.143911382 | 0.010350158 |
| SNP_A.K_978610_6_1740777    | 6  | 1740777  | 8.35E-06 | 0.26087 | 299 | 0.14390176  | 0.010359573 |
| SNP_A.K_990360_6_4712355    | 6  | 4712355  | 8.37E-06 | 0.20067 | 299 | 0.143887217 | 0.010374151 |
| SNP_A.K_306788_2_7350832    | 2  | 7350832  | 8.37E-06 | 0.23244 | 299 | 0.143885158 | 0.010374151 |
| SNP_A.K_990361_6_4712375    | 6  | 4712375  | 8.39E-06 | 0.19732 | 299 | 0.143871189 | 0.010390665 |
| SNP_A.K_1804142_11_7035804  | 11 | 7035804  | 8.41E-06 | 0.01839 | 299 | 0.143860142 | 0.010402453 |
| SNP_A.K_1830629_11_10571417 | 11 | 10571417 | 8.43E-06 | 0.36957 | 299 | 0.143843877 | 0.010417929 |
| SNP_A.K_1390322_8_10181340  | 8  | 10181340 | 8.43E-06 | 0.04682 | 299 | 0.143843045 | 0.010417929 |
| SNP_A.K_1364871_8_6050143   | 8  | 6050143  | 8.44E-06 | 0.10033 | 299 | 0.143832618 | 0.010422993 |
| SNP_A.K_1600930_9_18862335  | 9  | 18862335 | 8.44E-06 | 0.14047 | 299 | 0.143832354 | 0.010422993 |
| SNP_A.K_1004501_6_6893948   | 6  | 6893948  | 8.46E-06 | 0.30769 | 299 | 0.143817522 | 0.010433629 |
| SNP_A.K_990365_6_4712489    | 6  | 4712489  | 8.47E-06 | 0.20234 | 299 | 0.143814745 | 0.010433629 |
| SNP_A.K_1004062_6_6822849   | 6  | 6822849  | 8.47E-06 | 0.34114 | 299 | 0.143814475 | 0.010433629 |
| SNP_A.K_308323_2_7490402    | 2  | 7490402  | 8.48E-06 | 0.19732 | 299 | 0.143804175 | 0.010444274 |
| SNP_A.K_677721_4_906195     | 4  | 906195   | 8.49E-06 | 0.15385 | 299 | 0.143796714 | 0.01045029  |
| SNP_A.K_978628_6_1747015    | 6  | 1747015  | 8.51E-06 | 0.27592 | 299 | 0.143784652 | 0.010463846 |
| SNP_A.K_1390259_8_10167487  | 8  | 10167487 | 8.53E-06 | 0.04849 | 299 | 0.143763716 | 0.010491984 |
| SNP_A.K_990363_6_4712411    | 6  | 4712411  | 8.55E-06 | 0.19732 | 299 | 0.143749093 | 0.010503612 |
| SNP_A.K_990364_6_4712416    | 6  | 4712416  | 8.55E-06 | 0.19732 | 299 | 0.143749093 | 0.010503612 |

|                             |    |          |          |         |     |             |             |
|-----------------------------|----|----------|----------|---------|-----|-------------|-------------|
| SNP_A.K_990357_6_4712317    | 6  | 4712317  | 8.56E-06 | 0.20401 | 299 | 0.143740957 | 0.010510793 |
| SNP_A.K_1004375_6_6877639   | 6  | 6877639  | 8.57E-06 | 0.34281 | 299 | 0.143734416 | 0.010515358 |
| SNP_A.K_710234_4_8323620    | 4  | 8323620  | 8.63E-06 | 0.11706 | 299 | 0.143689835 | 0.010582745 |
| SNP_A.K_308770_2_7552253    | 2  | 7552253  | 8.64E-06 | 0.4097  | 299 | 0.143681256 | 0.010588006 |
| SNP_A.K_990322_6_4710600    | 6  | 4710600  | 8.65E-06 | 0.19732 | 299 | 0.143679138 | 0.010588006 |
| SNP_A.K_1608635_9_20804039  | 9  | 20804039 | 8.66E-06 | 0.23579 | 299 | 0.14367221  | 0.010589412 |
| SNP_A.K_990392_6_4714508    | 6  | 4714508  | 8.66E-06 | 0.20401 | 299 | 0.143668944 | 0.010589412 |
| SNP_A.K_1004396_6_6879402   | 6  | 6879402  | 8.66E-06 | 0.30936 | 299 | 0.143667025 | 0.010589412 |
| SNP_A.K_326590_2_10034363   | 2  | 10034363 | 8.67E-06 | 0.0602  | 299 | 0.143661641 | 0.010592119 |
| SNP_A.K_995278_6_5923820    | 6  | 5923820  | 8.69E-06 | 0.1204  | 299 | 0.143648423 | 0.010603815 |
| SNP_A.K_978405_6_1687961    | 6  | 1687961  | 8.69E-06 | 0.25585 | 299 | 0.143647095 | 0.010603815 |
| SNP_A.K_996292_6_5981704    | 6  | 5981704  | 8.72E-06 | 0.28261 | 299 | 0.143625649 | 0.01062731  |
| SNP_A.K_678411_4_985889     | 4  | 985889   | 8.72E-06 | 0.06689 | 299 | 0.143625469 | 0.01062731  |
| SNP_A.K_995214_6_5920403    | 6  | 5920403  | 8.74E-06 | 0.13712 | 299 | 0.143608605 | 0.010649165 |
| SNP_A.K_600991_3_24583196   | 3  | 24583196 | 8.76E-06 | 0.01839 | 299 | 0.143593923 | 0.010667426 |
| SNP_A.K_709808_4_8298240    | 4  | 8298240  | 8.78E-06 | 0.06856 | 299 | 0.14357967  | 0.010684556 |
| SNP_A.K_710325_4_8336426    | 4  | 8336426  | 8.79E-06 | 0.08528 | 299 | 0.143571397 | 0.010684556 |
| SNP_A.K_990327_6_4710755    | 6  | 4710755  | 8.79E-06 | 0.19231 | 299 | 0.143571363 | 0.010684556 |
| SNP_A.K_1600854_9_18853309  | 9  | 18853309 | 8.80E-06 | 0.12709 | 299 | 0.143565761 | 0.010684556 |
| SNP_A.K_1004419_6_6881380   | 6  | 6881380  | 8.81E-06 | 0.3311  | 299 | 0.143562349 | 0.010684556 |
| SNP_A.K_990325_6_4710703    | 6  | 4710703  | 8.81E-06 | 0.199   | 299 | 0.143560462 | 0.010684556 |
| SNP_A.K_195455_1_31196590   | 1  | 31196590 | 8.81E-06 | 0.47492 | 299 | 0.143557575 | 0.010684556 |
| SNP_A.K_977879_6_1608540    | 6  | 1608540  | 8.82E-06 | 0.1689  | 299 | 0.143551907 | 0.010687815 |
| SNP_A.K_1004914_6_6952274   | 6  | 6952274  | 8.84E-06 | 0.35619 | 299 | 0.14354187  | 0.010694032 |
| SNP_A.K_1004709_6_6922808   | 6  | 6922808  | 8.84E-06 | 0.20401 | 299 | 0.143540761 | 0.010694032 |
| SNP_A.K_308776_2_7552444    | 2  | 7552444  | 8.84E-06 | 0.22742 | 299 | 0.143534905 | 0.010697621 |
| SNP_A.K_1432213_8_16469057  | 8  | 16469057 | 8.88E-06 | 0.07525 | 299 | 0.14350954  | 0.010733947 |
| SNP_A.K_1390011_8_10145219  | 8  | 10145219 | 8.89E-06 | 0.04849 | 299 | 0.14350189  | 0.010740572 |
| SNP_A.K_306977_2_7371459    | 2  | 7371459  | 8.91E-06 | 0.26087 | 299 | 0.143489626 | 0.010754973 |
| SNP_A.K_1608645_9_20809573  | 9  | 20809573 | 8.95E-06 | 0.22742 | 299 | 0.143458982 | 0.010800432 |
| SNP_A.K_978175_6_1657731    | 6  | 1657731  | 8.97E-06 | 0.1689  | 299 | 0.143446968 | 0.010809116 |
| SNP_A.K_1005359_6_7009533   | 6  | 7009533  | 8.98E-06 | 0.25753 | 299 | 0.143440539 | 0.010809116 |
| SNP_A.K_1001442_6_6481777   | 6  | 6481777  | 8.98E-06 | 0.30769 | 299 | 0.143440288 | 0.010809116 |
| SNP_A.K_307323_2_7395007    | 2  | 7395007  | 8.98E-06 | 0.26756 | 299 | 0.143439056 | 0.010809116 |
| SNP_A.K_990348_6_4711834    | 6  | 4711834  | 8.99E-06 | 0.20569 | 299 | 0.143434239 | 0.010811017 |
| SNP_A.K_996198_6_5974181    | 6  | 5974181  | 9.00E-06 | 0.28094 | 299 | 0.143421898 | 0.01082567  |
| SNP_A.K_1830677_11_10573765 | 11 | 10573765 | 9.02E-06 | 0.16555 | 299 | 0.143408661 | 0.010841868 |
| SNP_A.K_1001287_6_6461845   | 6  | 6461845  | 9.10E-06 | 0.28261 | 299 | 0.143356358 | 0.010924719 |
| SNP_A.K_978788_6_1781475    | 6  | 1781475  | 9.11E-06 | 0.31605 | 299 | 0.143348588 | 0.010931712 |
| SNP_A.K_978929_6_1808243    | 6  | 1808243  | 9.14E-06 | 0.33445 | 299 | 0.143326686 | 0.010962949 |
| SNP_A.K_2080240_12_27248622 | 12 | 27248622 | 9.15E-06 | 0.01171 | 299 | 0.143318082 | 0.010971407 |
| SNP_A.K_1433082_8_16617064  | 8  | 16617064 | 9.16E-06 | 0.08696 | 299 | 0.143312071 | 0.010975417 |
| SNP_A.K_978736_6_1772612    | 6  | 1772612  | 9.17E-06 | 0.33612 | 299 | 0.143305861 | 0.010979775 |
| SNP_A.K_999260_6_6271990    | 6  | 6271990  | 9.19E-06 | 0.16722 | 299 | 0.143290405 | 0.011000055 |
| SNP_A.K_1804486_11_7079280  | 11 | 7079280  | 9.20E-06 | 0.01839 | 299 | 0.143280305 | 0.011011137 |
| SNP_A.K_709792_4_8297830    | 4  | 8297830  | 9.23E-06 | 0.07023 | 299 | 0.143264431 | 0.011025871 |
| SNP_A.K_709793_4_8297839    | 4  | 8297839  | 9.23E-06 | 0.07023 | 299 | 0.143264431 | 0.011025871 |
| SNP_A.K_1001842_6_6524271   | 6  | 6524271  | 9.24E-06 | 0.30435 | 299 | 0.143255585 | 0.011031226 |
| SNP_A.K_1196545_7_7627744   | 7  | 7627744  | 9.24E-06 | 0.01505 | 299 | 0.143253807 | 0.011031226 |
| SNP_A.K_978865_6_1792217    | 6  | 1792217  | 9.25E-06 | 0.29599 | 299 | 0.143250345 | 0.011031226 |

|                             |    |          |          |         |     |             |             |
|-----------------------------|----|----------|----------|---------|-----|-------------|-------------|
| SNP_A.K_709848_4_8299533    | 4  | 8299533  | 9.26E-06 | 0.07023 | 299 | 0.143240813 | 0.011041381 |
| SNP_A.K_1370949_8_7793086   | 8  | 7793086  | 9.30E-06 | 0.01338 | 299 | 0.143213613 | 0.011082172 |
| SNP_A.K_1005544_6_7022810   | 6  | 7022810  | 9.33E-06 | 0.29766 | 299 | 0.143195337 | 0.011107584 |
| SNP_A.K_401149_2_21824321   | 2  | 21824321 | 9.33E-06 | 0.05017 | 299 | 0.143190605 | 0.011109465 |
| SNP_A.K_2080313_12_27256266 | 12 | 27256266 | 9.35E-06 | 0.01338 | 299 | 0.143179097 | 0.011123148 |
| SNP_A.K_990507_6_4722308    | 6  | 4722308  | 9.36E-06 | 0.20903 | 299 | 0.143170488 | 0.011128015 |
| SNP_A.K_1608606_9_20794000  | 9  | 20794000 | 9.37E-06 | 0.24415 | 299 | 0.143168676 | 0.011128015 |
| SNP_A.K_1600942_9_18863483  | 9  | 18863483 | 9.37E-06 | 0.12876 | 299 | 0.14316537  | 0.011128015 |
| SNP_A.K_978205_6_1660310    | 6  | 1660310  | 9.38E-06 | 0.18227 | 299 | 0.143158367 | 0.011132802 |
| SNP_A.K_978182_6_1658336    | 6  | 1658336  | 9.39E-06 | 0.17391 | 299 | 0.143155143 | 0.011132802 |
| SNP_A.K_306905_2_7364891    | 2  | 7364891  | 9.39E-06 | 0.2408  | 299 | 0.143151709 | 0.011132802 |
| SNP_A.K_1001221_6_6455512   | 6  | 6455512  | 9.42E-06 | 0.35953 | 299 | 0.143134044 | 0.011157296 |
| SNP_A.K_719171_4_10646119   | 4  | 10646119 | 9.45E-06 | 0.06856 | 299 | 0.143111461 | 0.011190469 |
| SNP_A.K_307472_2_7409894    | 2  | 7409894  | 9.47E-06 | 0.25251 | 299 | 0.143096032 | 0.011211172 |
| SNP_A.K_1365034_8_6067527   | 8  | 6067527  | 9.48E-06 | 0.10201 | 299 | 0.143088784 | 0.011217534 |
| SNP_A.K_690714_4_4490974    | 4  | 4490974  | 9.49E-06 | 0.06187 | 299 | 0.143083148 | 0.011221067 |
| SNP_A.K_709525_4_8271593    | 4  | 8271593  | 9.50E-06 | 0.08361 | 299 | 0.143075949 | 0.011227354 |
| SNP_A.K_978190_6_1659353    | 6  | 1659353  | 9.61E-06 | 0.17559 | 299 | 0.143002797 | 0.011350331 |
| SNP_A.K_1804471_11_7078714  | 11 | 7078714  | 9.65E-06 | 0.01505 | 299 | 0.142976422 | 0.011387898 |
| SNP_A.K_978402_6_1687864    | 6  | 1687864  | 9.66E-06 | 0.25585 | 299 | 0.142974473 | 0.011387898 |
| SNP_A.K_1349475_8_3699993   | 8  | 3699993  | 9.69E-06 | 0.01672 | 299 | 0.142953728 | 0.011418507 |
| SNP_A.K_1001010_6_6436341   | 6  | 6436341  | 9.70E-06 | 0.2893  | 299 | 0.14294822  | 0.011421898 |
| SNP_A.K_990336_6_4711317    | 6  | 4711317  | 9.70E-06 | 0.20736 | 299 | 0.14294253  | 0.011425621 |
| SNP_A.K_1004338_6_6869730   | 6  | 6869730  | 9.73E-06 | 0.30435 | 299 | 0.142928763 | 0.011443822 |
| SNP_A.K_1000874_6_6421756   | 6  | 6421756  | 9.73E-06 | 0.28763 | 299 | 0.142924085 | 0.011445745 |
| SNP_A.K_978171_6_1657666    | 6  | 1657666  | 9.75E-06 | 0.2709  | 299 | 0.142913419 | 0.011456045 |
| SNP_A.K_1005480_6_7016563   | 6  | 7016563  | 9.75E-06 | 0.30602 | 299 | 0.142911139 | 0.011456045 |
| SNP_A.K_978692_6_1764553    | 6  | 1764553  | 9.80E-06 | 0.2709  | 299 | 0.142878714 | 0.011507911 |
| SNP_A.K_1005347_6_7008789   | 6  | 7008789  | 9.81E-06 | 0.37625 | 299 | 0.142873465 | 0.01151089  |
| SNP_A.K_1004779_6_6930481   | 6  | 6930481  | 9.82E-06 | 0.29599 | 299 | 0.142868476 | 0.011513403 |
| SNP_A.K_1382752_8_9115654   | 8  | 9115654  | 9.84E-06 | 0.27759 | 299 | 0.142852759 | 0.011535298 |
| SNP_A.K_1001155_6_6449633   | 6  | 6449633  | 9.85E-06 | 0.28595 | 299 | 0.142845889 | 0.011541227 |
| SNP_A.K_978404_6_1687944    | 6  | 1687944  | 9.86E-06 | 0.25251 | 299 | 0.142838379 | 0.01154832  |
| SNP_A.K_994847_6_5894454    | 6  | 5894454  | 9.87E-06 | 0.29431 | 299 | 0.142832762 | 0.011551995 |
| SNP_A.K_1830697_11_10574825 | 11 | 10574825 | 9.90E-06 | 0.17224 | 299 | 0.142817374 | 0.011572554 |
| SNP_A.K_996389_6_5998902    | 6  | 5998902  | 9.90E-06 | 0.11204 | 299 | 0.142814248 | 0.011572554 |
| SNP_A.K_978186_6_1658488    | 6  | 1658488  | 9.91E-06 | 0.25418 | 299 | 0.142808252 | 0.011576934 |
| SNP_A.K_129805_1_18618568   | 1  | 18618568 | 9.94E-06 | 0.35953 | 299 | 0.142792825 | 0.011598452 |
| SNP_A.K_995628_6_5943898    | 6  | 5943898  | 9.98E-06 | 0.36789 | 299 | 0.142763456 | 0.011645437 |
| SNP_A.K_1608491_9_20763576  | 9  | 20763576 | 9.99E-06 | 0.27425 | 299 | 0.142758844 | 0.011647329 |
| SNP_A.K_1000873_6_6421751   | 6  | 6421751  | 1.00E-05 | 0.28595 | 299 | 0.142750618 | 0.011655685 |
| SNP_A.K_1005199_6_6993058   | 6  | 6993058  | 1.00E-05 | 0.24582 | 299 | 0.142747125 | 0.011655685 |
| SNP_A.K_978716_6_1770131    | 6  | 1770131  | 1.00E-05 | 0.32441 | 299 | 0.142738361 | 0.011665181 |
| SNP_A.K_709787_4_8297724    | 4  | 8297724  | 1.00E-05 | 0.07023 | 299 | 0.142731199 | 0.011671712 |
| SNP_A.K_978762_6_1776093    | 6  | 1776093  | 1.00E-05 | 0.36789 | 299 | 0.142727659 | 0.011671712 |
| SNP_A.K_1608642_9_20809180  | 9  | 20809180 | 1.00E-05 | 0.29599 | 299 | 0.142723154 | 0.011673001 |
| SNP_A.K_15401_1_2381814     | 1  | 2381814  | 1.01E-05 | 0.02007 | 299 | 0.142718594 | 0.011673001 |
| SNP_A.K_995836_6_5952246    | 6  | 5952246  | 1.01E-05 | 0.29766 | 299 | 0.142716271 | 0.011673001 |
| SNP_A.K_196309_1_31386612   | 1  | 31386612 | 1.01E-05 | 0.06689 | 299 | 0.142700885 | 0.011685889 |
| SNP_A.K_456473_2_33042482   | 2  | 33042482 | 1.01E-05 | 0.12876 | 299 | 0.142699791 | 0.011685889 |

|                             |    |          |          |         |     |             |             |
|-----------------------------|----|----------|----------|---------|-----|-------------|-------------|
| SNP_A.K_990362_6_4712388    | 6  | 4712388  | 1.01E-05 | 0.19398 | 299 | 0.142698568 | 0.011685889 |
| SNP_A.K_1005008_6_6961751   | 6  | 6961751  | 1.01E-05 | 0.32943 | 299 | 0.142693501 | 0.011688666 |
| SNP_A.K_709846_4_8299492    | 4  | 8299492  | 1.02E-05 | 0.07358 | 299 | 0.142654071 | 0.011754602 |
| SNP_A.K_710086_4_8315557    | 4  | 8315557  | 1.02E-05 | 0.0786  | 299 | 0.142632424 | 0.011785062 |
| SNP_A.K_1433032_8_16612288  | 8  | 16612288 | 1.02E-05 | 0.08194 | 299 | 0.142630473 | 0.011785062 |
| SNP_A.K_990380_6_4712804    | 6  | 4712804  | 1.02E-05 | 0.20067 | 299 | 0.142623407 | 0.011791574 |
| SNP_A.K_673427_4_361172     | 4  | 361172   | 1.02E-05 | 0.12876 | 299 | 0.142606253 | 0.011816768 |
| SNP_A.K_978288_6_1669353    | 6  | 1669353  | 1.02E-05 | 0.24916 | 299 | 0.142596893 | 0.011827561 |
| SNP_A.K_1183725_7_4599480   | 7  | 4599480  | 1.03E-05 | 0.0602  | 299 | 0.142589224 | 0.011835226 |
| SNP_A.K_308318_2_7490175    | 2  | 7490175  | 1.03E-05 | 0.2592  | 299 | 0.142584831 | 0.01183682  |
| SNP_A.K_1364919_8_6056951   | 8  | 6056951  | 1.03E-05 | 0.12876 | 299 | 0.142574891 | 0.011838976 |
| SNP_A.K_978874_6_1793756    | 6  | 1793756  | 1.03E-05 | 0.32776 | 299 | 0.142572397 | 0.011838976 |
| SNP_A.K_977930_6_1622032    | 6  | 1622032  | 1.03E-05 | 0.20569 | 299 | 0.142571047 | 0.011838976 |
| SNP_A.K_978197_6_1659789    | 6  | 1659789  | 1.03E-05 | 0.17224 | 299 | 0.142569551 | 0.011838976 |
| SNP_A.K_978180_6_1658262    | 6  | 1658262  | 1.03E-05 | 0.17893 | 299 | 0.142564672 | 0.011841492 |
| SNP_A.K_990282_6_4704596    | 6  | 4704596  | 1.03E-05 | 0.20067 | 299 | 0.142559644 | 0.011844288 |
| SNP_A.K_990230_6_4701471    | 6  | 4701471  | 1.03E-05 | 0.20569 | 299 | 0.142536277 | 0.011881204 |
| SNP_A.K_277614_2_2954938    | 2  | 2954938  | 1.04E-05 | 0.06689 | 299 | 0.142527921 | 0.01188327  |
| SNP_A.K_978074_6_1645345    | 6  | 1645345  | 1.04E-05 | 0.17559 | 299 | 0.14252489  | 0.01188327  |
| SNP_A.K_1001472_6_6482907   | 6  | 6482907  | 1.04E-05 | 0.2893  | 299 | 0.142521458 | 0.01188327  |
| SNP_A.K_678728_4_995364     | 4  | 995364   | 1.04E-05 | 0.07023 | 299 | 0.142515498 | 0.01188327  |
| SNP_A.K_978765_6_1777372    | 6  | 1777372  | 1.04E-05 | 0.33445 | 299 | 0.142514267 | 0.01188327  |
| SNP_A.K_307394_2_7400887    | 2  | 7400887  | 1.04E-05 | 0.2592  | 299 | 0.142513661 | 0.01188327  |
| SNP_A.K_978178_6_1657844    | 6  | 1657844  | 1.04E-05 | 0.19732 | 299 | 0.14251058  | 0.01188327  |
| SNP_A.K_1005584_6_7028359   | 6  | 7028359  | 1.04E-05 | 0.33278 | 299 | 0.142503531 | 0.011889875 |
| SNP_A.K_978095_6_1647085    | 6  | 1647085  | 1.04E-05 | 0.17391 | 299 | 0.142484869 | 0.011918174 |
| SNP_A.K_990444_6_4718339    | 6  | 4718339  | 1.05E-05 | 0.47826 | 299 | 0.142467019 | 0.011945024 |
| SNP_A.K_306875_2_7362996    | 2  | 7362996  | 1.05E-05 | 0.27926 | 299 | 0.142460841 | 0.011946378 |
| SNP_A.K_1608557_9_20777260  | 9  | 20777260 | 1.05E-05 | 0.23746 | 299 | 0.142459301 | 0.011946378 |
| SNP_A.K_306770_2_7349370    | 2  | 7349370  | 1.05E-05 | 0.23746 | 299 | 0.142440238 | 0.011972646 |
| SNP_A.K_307100_2_7379180    | 2  | 7379180  | 1.05E-05 | 0.24749 | 299 | 0.142437838 | 0.011972646 |
| SNP_A.K_709872_4_8300067    | 4  | 8300067  | 1.05E-05 | 0.07191 | 299 | 0.142434817 | 0.011972646 |
| SNP_A.K_978880_6_1794363    | 6  | 1794363  | 1.05E-05 | 0.301   | 299 | 0.14242705  | 0.011979773 |
| SNP_A.K_977903_6_1618777    | 6  | 1618777  | 1.05E-05 | 0.24582 | 299 | 0.142418002 | 0.011979773 |
| SNP_A.K_978300_6_1671803    | 6  | 1671803  | 1.05E-05 | 0.25251 | 299 | 0.142417704 | 0.011979773 |
| SNP_A.K_1433066_8_16616204  | 8  | 16616204 | 1.05E-05 | 0.08194 | 299 | 0.142412924 | 0.011979773 |
| SNP_A.K_1830766_11_10579998 | 11 | 10579998 | 1.05E-05 | 0.28261 | 299 | 0.142410812 | 0.011979773 |
| SNP_A.K_1855176_11_14565502 | 11 | 14565502 | 1.05E-05 | 0.03512 | 299 | 0.142410117 | 0.011979773 |
| SNP_A.K_1608538_9_20773152  | 9  | 20773152 | 1.06E-05 | 0.32609 | 299 | 0.14239613  | 0.011993486 |
| SNP_A.K_678203_4_968678     | 4  | 968678   | 1.06E-05 | 0.14214 | 299 | 0.142392363 | 0.011993486 |
| SNP_A.K_280510_2_3619907    | 2  | 3619907  | 1.06E-05 | 0.01338 | 299 | 0.142389506 | 0.011993486 |
| SNP_A.K_1001534_6_6487642   | 6  | 6487642  | 1.06E-05 | 0.301   | 299 | 0.142388925 | 0.011993486 |
| SNP_A.K_672551_4_259476     | 4  | 259476   | 1.06E-05 | 0.10201 | 299 | 0.142380361 | 0.012003072 |
| SNP_A.K_1005216_6_6995106   | 6  | 6995106  | 1.06E-05 | 0.30435 | 299 | 0.142373616 | 0.012007637 |
| SNP_A.K_977978_6_1628167    | 6  | 1628167  | 1.06E-05 | 0.24582 | 299 | 0.142370741 | 0.012007637 |
| SNP_A.K_978707_6_1769205    | 6  | 1769205  | 1.06E-05 | 0.3495  | 299 | 0.142367539 | 0.012007637 |
| SNP_A.K_306974_2_7371290    | 2  | 7371290  | 1.07E-05 | 0.24582 | 299 | 0.14233782  | 0.012057193 |
| SNP_A.K_307508_2_7413925    | 2  | 7413925  | 1.07E-05 | 0.23913 | 299 | 0.142323904 | 0.012073691 |
| SNP_A.K_1600877_9_18857982  | 9  | 18857982 | 1.07E-05 | 0.12542 | 299 | 0.142322184 | 0.012073691 |
| SNP_A.K_1000627_6_6401387   | 6  | 6401387  | 1.08E-05 | 0.28261 | 299 | 0.14228685  | 0.012134219 |

|                             |    |          |          |         |     |             |             |
|-----------------------------|----|----------|----------|---------|-----|-------------|-------------|
| SNP_A.K_306817_2_7355363    | 2  | 7355363  | 1.08E-05 | 0.27926 | 299 | 0.142272417 | 0.012155135 |
| SNP_A.K_993636_6_5780657    | 6  | 5780657  | 1.08E-05 | 0.29264 | 299 | 0.142265593 | 0.012158185 |
| SNP_A.K_977875_6_1606487    | 6  | 1606487  | 1.08E-05 | 0.15552 | 299 | 0.142263916 | 0.012158185 |
| SNP_A.K_1004825_6_6934278   | 6  | 6934278  | 1.09E-05 | 0.29766 | 299 | 0.142225694 | 0.012224692 |
| SNP_A.K_990247_6_4703017    | 6  | 4703017  | 1.09E-05 | 0.20736 | 299 | 0.142203836 | 0.012259202 |
| SNP_A.K_1004867_6_6937822   | 6  | 6937822  | 1.09E-05 | 0.31271 | 299 | 0.142200836 | 0.012259202 |
| SNP_A.K_1000743_6_6414136   | 6  | 6414136  | 1.09E-05 | 0.29599 | 299 | 0.14217849  | 0.012295617 |
| SNP_A.K_1001532_6_6487625   | 6  | 6487625  | 1.10E-05 | 0.30435 | 299 | 0.142153228 | 0.012337786 |
| SNP_A.K_1006016_6_7096567   | 6  | 7096567  | 1.10E-05 | 0.31104 | 299 | 0.142146868 | 0.012343444 |
| SNP_A.K_456491_2_33046845   | 2  | 33046845 | 1.10E-05 | 0.06522 | 299 | 0.142139677 | 0.012350718 |
| SNP_A.K_306839_2_7358520    | 2  | 7358520  | 1.10E-05 | 0.26589 | 299 | 0.142129592 | 0.012363612 |
| SNP_A.K_752052_4_17818945   | 4  | 17818945 | 1.10E-05 | 0.02174 | 299 | 0.142122773 | 0.012370183 |
| SNP_A.K_1719483_10_15806214 | 10 | 15806214 | 1.10E-05 | 0.03512 | 299 | 0.142115844 | 0.012376975 |
| SNP_A.K_978681_6_1760250    | 6  | 1760250  | 1.11E-05 | 0.27258 | 299 | 0.142107886 | 0.012378048 |
| SNP_A.K_1001316_6_6464817   | 6  | 6464817  | 1.11E-05 | 0.29264 | 299 | 0.14210678  | 0.012378048 |
| SNP_A.K_1004869_6_6938024   | 6  | 6938024  | 1.11E-05 | 0.33278 | 299 | 0.142102746 | 0.012378048 |
| SNP_A.K_1000989_6_6434190   | 6  | 6434190  | 1.11E-05 | 0.33445 | 299 | 0.142098845 | 0.012378048 |
| SNP_A.K_194494_1_30878531   | 1  | 30878531 | 1.11E-05 | 0.3796  | 299 | 0.142098165 | 0.012378048 |
| SNP_A.K_978315_6_1674540    | 6  | 1674540  | 1.11E-05 | 0.29264 | 299 | 0.14209324  | 0.012380972 |
| SNP_A.K_1390017_8_10145392  | 8  | 10145392 | 1.11E-05 | 0.04849 | 299 | 0.142087518 | 0.012385451 |
| SNP_A.K_326817_2_10057358   | 2  | 10057358 | 1.11E-05 | 0.06355 | 299 | 0.142082253 | 0.012389044 |
| SNP_A.K_1001750_6_6514639   | 6  | 6514639  | 1.11E-05 | 0.30435 | 299 | 0.142069324 | 0.012407558 |
| SNP_A.K_307375_2_7399723    | 2  | 7399723  | 1.11E-05 | 0.25251 | 299 | 0.142057289 | 0.012422248 |
| SNP_A.K_1365035_8_6067627   | 8  | 6067627  | 1.12E-05 | 0.12876 | 299 | 0.142053911 | 0.012422248 |
| SNP_A.K_1001132_6_6448523   | 6  | 6448523  | 1.12E-05 | 0.28763 | 299 | 0.142050581 | 0.012422248 |
| SNP_A.K_710488_4_8424729    | 4  | 8424729  | 1.12E-05 | 0.07023 | 299 | 0.142048146 | 0.012422248 |
| SNP_A.K_1608579_9_20789844  | 9  | 20789844 | 1.12E-05 | 0.22408 | 299 | 0.142035694 | 0.012439898 |
| SNP_A.K_977874_6_1606181    | 6  | 1606181  | 1.12E-05 | 0.15217 | 299 | 0.142029915 | 0.012444537 |
| SNP_A.K_709804_4_8298098    | 4  | 8298098  | 1.12E-05 | 0.07191 | 299 | 0.142019118 | 0.012452346 |
| SNP_A.K_709805_4_8298101    | 4  | 8298101  | 1.12E-05 | 0.07191 | 299 | 0.142019118 | 0.012452346 |
| SNP_A.K_709200_4_8238535    | 4  | 8238535  | 1.12E-05 | 0.08528 | 299 | 0.142011438 | 0.012453921 |
| SNP_A.K_1004348_6_6870694   | 6  | 6870694  | 1.12E-05 | 0.36288 | 299 | 0.142010562 | 0.012453921 |
| SNP_A.K_990354_6_4712180    | 6  | 4712180  | 1.12E-05 | 0.14047 | 299 | 0.142007753 | 0.012453921 |
| SNP_A.K_1004999_6_6961072   | 6  | 6961072  | 1.12E-05 | 0.32274 | 299 | 0.142004734 | 0.012453921 |
| SNP_A.K_194918_1_30999355   | 1  | 30999355 | 1.13E-05 | 0.40635 | 299 | 0.141994931 | 0.012466461 |
| SNP_A.K_999746_6_6312241    | 6  | 6312241  | 1.13E-05 | 0.16221 | 299 | 0.141967264 | 0.012510939 |
| SNP_A.K_1000814_6_6417622   | 6  | 6417622  | 1.13E-05 | 0.33278 | 299 | 0.141965465 | 0.012510939 |
| SNP_A.K_709881_4_8300221    | 4  | 8300221  | 1.14E-05 | 0.07191 | 299 | 0.141933116 | 0.012561326 |
| SNP_A.K_194269_1_30836940   | 1  | 30836940 | 1.14E-05 | 0.48997 | 299 | 0.141933091 | 0.012561326 |
| SNP_A.K_1364872_8_6050156   | 8  | 6050156  | 1.14E-05 | 0.10201 | 299 | 0.141899733 | 0.012616152 |
| SNP_A.K_1003989_6_6812561   | 6  | 6812561  | 1.14E-05 | 0.38629 | 299 | 0.141898586 | 0.012616152 |
| SNP_A.K_978161_6_1656538    | 6  | 1656538  | 1.14E-05 | 0.17559 | 299 | 0.141894683 | 0.012617194 |
| SNP_A.K_1389938_8_10136380  | 8  | 10136380 | 1.15E-05 | 0.05017 | 299 | 0.141862127 | 0.012675123 |
| SNP_A.K_1005688_6_7034049   | 6  | 7034049  | 1.15E-05 | 0.27592 | 299 | 0.141844219 | 0.012698684 |
| SNP_A.K_308458_2_7517440    | 2  | 7517440  | 1.15E-05 | 0.19565 | 299 | 0.141843553 | 0.012698684 |
| SNP_A.K_307154_2_7382405    | 2  | 7382405  | 1.16E-05 | 0.39967 | 299 | 0.141821044 | 0.012736897 |
| SNP_A.K_679467_4_1085937    | 4  | 1085937  | 1.16E-05 | 0.02508 | 299 | 0.141814205 | 0.012743842 |
| SNP_A.K_1349619_8_3724870   | 8  | 3724870  | 1.16E-05 | 0.01839 | 299 | 0.141806628 | 0.012752125 |
| SNP_A.K_978632_6_1747812    | 6  | 1747812  | 1.16E-05 | 0.26756 | 299 | 0.141803336 | 0.012752125 |
| SNP_A.K_308430_2_7513181    | 2  | 7513181  | 1.16E-05 | 0.199   | 299 | 0.141799647 | 0.01275278  |

|                             |    |          |          |         |     |             |             |
|-----------------------------|----|----------|----------|---------|-----|-------------|-------------|
| SNP_A.K_1000762_6_6415502   | 6  | 6415502  | 1.16E-05 | 0.34448 | 299 | 0.141793156 | 0.012759051 |
| SNP_A.K_1432449_8_16508250  | 8  | 16508250 | 1.16E-05 | 0.07692 | 299 | 0.141789464 | 0.012759719 |
| SNP_A.K_2062771_12_23886161 | 12 | 23886161 | 1.16E-05 | 0.02676 | 299 | 0.141780668 | 0.012770621 |
| SNP_A.K_978196_6_1659757    | 6  | 1659757  | 1.17E-05 | 0.17391 | 299 | 0.141771047 | 0.012781603 |
| SNP_A.K_456445_2_33037326   | 2  | 33037326 | 1.17E-05 | 0.11873 | 299 | 0.141768485 | 0.012781603 |
| SNP_A.K_978599_6_1737975    | 6  | 1737975  | 1.17E-05 | 0.25585 | 299 | 0.141764554 | 0.012782766 |
| SNP_A.K_995648_6_5946264    | 6  | 5946264  | 1.17E-05 | 0.38796 | 299 | 0.141756754 | 0.012791701 |
| SNP_A.K_325940_2_9962957    | 2  | 9962957  | 1.17E-05 | 0.04849 | 299 | 0.14174879  | 0.012800192 |
| SNP_A.K_990339_6_4711556    | 6  | 4711556  | 1.17E-05 | 0.20067 | 299 | 0.141744031 | 0.012800192 |
| SNP_A.K_994786_6_5888958    | 6  | 5888958  | 1.17E-05 | 0.28094 | 299 | 0.14174249  | 0.012800192 |
| SNP_A.K_978146_6_1654064    | 6  | 1654064  | 1.17E-05 | 0.17391 | 299 | 0.141737769 | 0.012802964 |
| SNP_A.K_1001713_6_6508525   | 6  | 6508525  | 1.17E-05 | 0.29599 | 299 | 0.141733595 | 0.012804299 |
| SNP_A.K_978139_6_1651588    | 6  | 1651588  | 1.17E-05 | 0.25585 | 299 | 0.141730425 | 0.012804299 |
| SNP_A.K_312090_2_7906329    | 2  | 7906329  | 1.18E-05 | 0.28094 | 299 | 0.141720432 | 0.012817688 |
| SNP_A.K_1000623_6_6401217   | 6  | 6401217  | 1.18E-05 | 0.28428 | 299 | 0.141691166 | 0.012869985 |
| SNP_A.K_990372_6_4712627    | 6  | 4712627  | 1.19E-05 | 0.20569 | 299 | 0.141667383 | 0.012905464 |
| SNP_A.K_978298_6_1671382    | 6  | 1671382  | 1.19E-05 | 0.24916 | 299 | 0.141666971 | 0.012905464 |
| SNP_A.K_194450_1_30873906   | 1  | 30873906 | 1.19E-05 | 0.37291 | 299 | 0.141647864 | 0.012937478 |
| SNP_A.K_1001224_6_6455819   | 6  | 6455819  | 1.19E-05 | 0.28595 | 299 | 0.141640922 | 0.012944823 |
| SNP_A.K_1001598_6_6497124   | 6  | 6497124  | 1.19E-05 | 0.28595 | 299 | 0.141635465 | 0.012949155 |
| SNP_A.K_29305_1_4222839     | 1  | 4222839  | 1.19E-05 | 0.10368 | 299 | 0.141616019 | 0.012981981 |
| SNP_A.K_995647_6_5946239    | 6  | 5946239  | 1.20E-05 | 0.45485 | 299 | 0.141604926 | 0.012989015 |
| SNP_A.K_456685_2_33105070   | 2  | 33105070 | 1.20E-05 | 0.01839 | 299 | 0.141602609 | 0.012989015 |
| SNP_A.K_456579_2_33074293   | 2  | 33074293 | 1.20E-05 | 0.01839 | 299 | 0.141602609 | 0.012989015 |
| SNP_A.K_1364924_8_6057881   | 8  | 6057881  | 1.20E-05 | 0.07525 | 299 | 0.141571473 | 0.013045888 |
| SNP_A.K_1000812_6_6417528   | 6  | 6417528  | 1.21E-05 | 0.3311  | 299 | 0.14154773  | 0.013087812 |
| SNP_A.K_1608485_9_20762901  | 9  | 20762901 | 1.21E-05 | 0.28261 | 299 | 0.14153687  | 0.013103335 |
| SNP_A.K_990337_6_4711363    | 6  | 4711363  | 1.21E-05 | 0.20401 | 299 | 0.141531685 | 0.013105101 |
| SNP_A.K_709528_4_8271656    | 4  | 8271656  | 1.21E-05 | 0.08194 | 299 | 0.14152939  | 0.013105101 |
| SNP_A.K_710480_4_8424227    | 4  | 8424227  | 1.21E-05 | 0.07023 | 299 | 0.141522854 | 0.013111747 |
| SNP_A.K_990358_6_4712319    | 6  | 4712319  | 1.21E-05 | 0.20903 | 299 | 0.141517264 | 0.013116452 |
| SNP_A.K_307076_2_7377974    | 2  | 7377974  | 1.22E-05 | 0.2592  | 299 | 0.141502426 | 0.013135127 |
| SNP_A.K_994898_6_5900200    | 6  | 5900200  | 1.22E-05 | 0.07023 | 299 | 0.141501599 | 0.013135127 |
| SNP_A.K_1781564_11_3218614  | 11 | 3218614  | 1.22E-05 | 0.0301  | 299 | 0.141469503 | 0.013194673 |
| SNP_A.K_978592_6_1736235    | 6  | 1736235  | 1.23E-05 | 0.26254 | 299 | 0.141446401 | 0.013234883 |
| SNP_A.K_990457_6_4718859    | 6  | 4718859  | 1.23E-05 | 0.19064 | 299 | 0.141443537 | 0.013234883 |
| SNP_A.K_1001315_6_6464725   | 6  | 6464725  | 1.23E-05 | 0.2893  | 299 | 0.141425583 | 0.013265394 |
| SNP_A.K_1000696_6_6412405   | 6  | 6412405  | 1.23E-05 | 0.32274 | 299 | 0.141416412 | 0.013277649 |
| SNP_A.K_1389980_8_10141596  | 8  | 10141596 | 1.24E-05 | 0.05184 | 299 | 0.141404433 | 0.01329578  |
| SNP_A.K_978633_6_1747877    | 6  | 1747877  | 1.24E-05 | 0.28261 | 299 | 0.1413948   | 0.013304916 |
| SNP_A.K_1000981_6_6432167   | 6  | 6432167  | 1.24E-05 | 0.33278 | 299 | 0.141393482 | 0.013304916 |
| SNP_A.K_1389968_8_10139482  | 8  | 10139482 | 1.24E-05 | 0.04682 | 299 | 0.141386695 | 0.013312234 |
| SNP_A.K_1001305_6_6463410   | 6  | 6463410  | 1.25E-05 | 0.29599 | 299 | 0.141354333 | 0.013373188 |
| SNP_A.K_678572_4_990276     | 4  | 990276   | 1.25E-05 | 0.06856 | 299 | 0.141341585 | 0.013391608 |
| SNP_A.K_978665_6_1751903    | 6  | 1751903  | 1.25E-05 | 0.30936 | 299 | 0.1413372   | 0.013391608 |
| SNP_A.K_978104_6_1647239    | 6  | 1647239  | 1.25E-05 | 0.25418 | 299 | 0.141335728 | 0.013391608 |
| SNP_A.K_1004642_6_6913326   | 6  | 6913326  | 1.26E-05 | 0.29933 | 299 | 0.141294837 | 0.013470987 |
| SNP_A.K_307054_2_7376254    | 2  | 7376254  | 1.26E-05 | 0.23244 | 299 | 0.141291178 | 0.013471798 |
| SNP_A.K_993837_6_5796336    | 6  | 5796336  | 1.26E-05 | 0.15886 | 299 | 0.14127519  | 0.013498738 |
| SNP_A.K_678146_4_964582     | 4  | 964582   | 1.26E-05 | 0.16054 | 299 | 0.141266065 | 0.013511157 |

|                             |    |          |          |         |     |             |             |
|-----------------------------|----|----------|----------|---------|-----|-------------|-------------|
| SNP_A.K_709791_4_8297819    | 4  | 8297819  | 1.26E-05 | 0.07191 | 299 | 0.14125945  | 0.013518259 |
| SNP_A.K_978603_6_1738798    | 6  | 1738798  | 1.26E-05 | 0.2592  | 299 | 0.141254163 | 0.013522547 |
| SNP_A.K_1005024_6_6962876   | 6  | 6962876  | 1.27E-05 | 0.32274 | 299 | 0.141249051 | 0.013526467 |
| SNP_A.K_709871_4_8300058    | 4  | 8300058  | 1.27E-05 | 0.07358 | 299 | 0.141232403 | 0.013554941 |
| SNP_A.K_1382750_8_9115622   | 8  | 9115622  | 1.27E-05 | 0.28261 | 299 | 0.141219674 | 0.013575118 |
| SNP_A.K_710116_4_8316706    | 4  | 8316706  | 1.28E-05 | 0.08194 | 299 | 0.141201031 | 0.013607971 |
| SNP_A.K_994345_6_5849451    | 6  | 5849451  | 1.28E-05 | 0.2291  | 299 | 0.141194072 | 0.013615884 |
| SNP_A.K_710119_4_8317289    | 4  | 8317289  | 1.28E-05 | 0.09866 | 299 | 0.141180813 | 0.0136373   |
| SNP_A.K_1608628_9_20803584  | 9  | 20803584 | 1.28E-05 | 0.28763 | 299 | 0.141169055 | 0.013655532 |
| SNP_A.K_1600932_9_18862404  | 9  | 18862404 | 1.28E-05 | 0.1204  | 299 | 0.141161142 | 0.013660293 |
| SNP_A.K_990335_6_4711227    | 6  | 4711227  | 1.28E-05 | 0.21237 | 299 | 0.141159261 | 0.013660293 |
| SNP_A.K_990350_6_4711965    | 6  | 4711965  | 1.29E-05 | 0.20569 | 299 | 0.141153298 | 0.013660293 |
| SNP_A.K_993073_6_5704964    | 6  | 5704964  | 1.29E-05 | 0.15385 | 299 | 0.141149284 | 0.013660293 |
| SNP_A.K_978896_6_1798493    | 6  | 1798493  | 1.29E-05 | 0.33779 | 299 | 0.141147967 | 0.013660293 |
| SNP_A.K_1001766_6_6519580   | 6  | 6519580  | 1.29E-05 | 0.28595 | 299 | 0.141146266 | 0.013660293 |
| SNP_A.K_1608596_9_20792124  | 9  | 20792124 | 1.29E-05 | 0.24247 | 299 | 0.141144084 | 0.013660293 |
| SNP_A.K_1001237_6_6456904   | 6  | 6456904  | 1.29E-05 | 0.29431 | 299 | 0.141134045 | 0.013674892 |
| SNP_A.K_306775_2_7349677    | 2  | 7349677  | 1.29E-05 | 0.2408  | 299 | 0.141107255 | 0.013721569 |
| SNP_A.K_978634_6_1748034    | 6  | 1748034  | 1.29E-05 | 0.28763 | 299 | 0.141105883 | 0.013721569 |
| SNP_A.K_1608493_9_20763734  | 9  | 20763734 | 1.30E-05 | 0.29431 | 299 | 0.141095995 | 0.013735918 |
| SNP_A.K_307492_2_7412882    | 2  | 7412882  | 1.30E-05 | 0.23579 | 299 | 0.14105705  | 0.013813236 |
| SNP_A.K_990340_6_4711574    | 6  | 4711574  | 1.31E-05 | 0.20067 | 299 | 0.141041255 | 0.013836334 |
| SNP_A.K_1390240_8_10166668  | 8  | 10166668 | 1.31E-05 | 0.04849 | 299 | 0.141039774 | 0.013836334 |
| SNP_A.K_990329_6_4710809    | 6  | 4710809  | 1.31E-05 | 0.20903 | 299 | 0.141036722 | 0.013836334 |
| SNP_A.K_456494_2_33047934   | 2  | 33047934 | 1.31E-05 | 0.06689 | 299 | 0.141023689 | 0.013857672 |
| SNP_A.K_978026_6_1640830    | 6  | 1640830  | 1.32E-05 | 0.28428 | 299 | 0.141000145 | 0.013902003 |
| SNP_A.K_306971_2_7371153    | 2  | 7371153  | 1.32E-05 | 0.25585 | 299 | 0.140992618 | 0.013911405 |
| SNP_A.K_996231_6_5976246    | 6  | 5976246  | 1.32E-05 | 0.37291 | 299 | 0.140972382 | 0.013948661 |
| SNP_A.K_1005058_6_6966888   | 6  | 6966888  | 1.33E-05 | 0.31271 | 299 | 0.140950914 | 0.01398873  |
| SNP_A.K_978679_6_1758924    | 6  | 1758924  | 1.33E-05 | 0.27592 | 299 | 0.140945351 | 0.01399388  |
| SNP_A.K_1794676_11_5474936  | 11 | 5474936  | 1.33E-05 | 0.44147 | 299 | 0.140932248 | 0.014015644 |
| SNP_A.K_1608598_9_20792178  | 9  | 20792178 | 1.33E-05 | 0.23411 | 299 | 0.140925555 | 0.014023304 |
| SNP_A.K_1600805_9_18842812  | 9  | 18842812 | 1.33E-05 | 0.12542 | 299 | 0.140913923 | 0.014041872 |
| SNP_A.K_257550_1_41599614   | 1  | 41599614 | 1.34E-05 | 0.02843 | 299 | 0.140898696 | 0.014061401 |
| SNP_A.K_710114_4_8316691    | 4  | 8316691  | 1.34E-05 | 0.0786  | 299 | 0.140898657 | 0.014061401 |
| SNP_A.K_1005473_6_7015713   | 6  | 7015713  | 1.34E-05 | 0.35953 | 299 | 0.140880704 | 0.014094034 |
| SNP_A.K_1004146_6_6838409   | 6  | 6838409  | 1.34E-05 | 0.31271 | 299 | 0.140875735 | 0.014097932 |
| SNP_A.K_709754_4_8284876    | 4  | 8284876  | 1.35E-05 | 0.08361 | 299 | 0.140854373 | 0.014138236 |
| SNP_A.K_977963_6_1625935    | 6  | 1625935  | 1.35E-05 | 0.17057 | 299 | 0.140849848 | 0.014141168 |
| SNP_A.K_1004357_6_6875266   | 6  | 6875266  | 1.35E-05 | 0.3194  | 299 | 0.140833672 | 0.014170042 |
| SNP_A.K_977912_6_1621176    | 6  | 1621176  | 1.36E-05 | 0.16388 | 299 | 0.140804211 | 0.014224532 |
| SNP_A.K_1433063_8_16615989  | 8  | 16615989 | 1.36E-05 | 0.07525 | 299 | 0.14079982  | 0.014224532 |
| SNP_A.K_308426_2_7512251    | 2  | 7512251  | 1.36E-05 | 0.22241 | 299 | 0.140795107 | 0.014224532 |
| SNP_A.K_990239_6_4702703    | 6  | 4702703  | 1.36E-05 | 0.20903 | 299 | 0.140790689 | 0.014224532 |
| SNP_A.K_709825_4_8298559    | 4  | 8298559  | 1.36E-05 | 0.07023 | 299 | 0.140790483 | 0.014224532 |
| SNP_A.K_990328_6_4710774    | 6  | 4710774  | 1.36E-05 | 0.20569 | 299 | 0.140790075 | 0.014224532 |
| SNP_A.K_2068303_12_24973861 | 12 | 24973861 | 1.36E-05 | 0.02174 | 299 | 0.140785143 | 0.014228424 |
| SNP_A.K_1608514_9_20770019  | 9  | 20770019 | 1.36E-05 | 0.29431 | 299 | 0.14077144  | 0.01424949  |
| SNP_A.K_709880_4_8300209    | 4  | 8300209  | 1.37E-05 | 0.07191 | 299 | 0.140769355 | 0.01424949  |
| SNP_A.K_907940_5_17467198   | 5  | 17467198 | 1.37E-05 | 0.02174 | 299 | 0.140760245 | 0.014262768 |



|                             |    |          |          |         |     |             |             |
|-----------------------------|----|----------|----------|---------|-----|-------------|-------------|
| SNP_A.K_1004356_6_6875233   | 6  | 6875233  | 1.37E-05 | 0.31438 | 299 | 0.140747966 | 0.014283179 |
| SNP_A.K_306890_2_7364030    | 2  | 7364030  | 1.37E-05 | 0.2709  | 299 | 0.140733949 | 0.014302191 |
| SNP_A.K_978138_6_1651318    | 6  | 1651318  | 1.37E-05 | 0.17224 | 299 | 0.140732697 | 0.014302191 |
| SNP_A.K_992970_6_5692884    | 6  | 5692884  | 1.37E-05 | 0.23077 | 299 | 0.140728012 | 0.014302191 |
| SNP_A.K_1830772_11_10580303 | 11 | 10580303 | 1.37E-05 | 0.21906 | 299 | 0.140725299 | 0.014302191 |
| SNP_A.K_307533_2_7416065    | 2  | 7416065  | 1.37E-05 | 0.25753 | 299 | 0.140723472 | 0.014302191 |
| SNP_A.K_1000986_6_6433922   | 6  | 6433922  | 1.38E-05 | 0.32441 | 299 | 0.140720425 | 0.014302191 |
| SNP_A.K_1000975_6_6430830   | 6  | 6430830  | 1.39E-05 | 0.33445 | 299 | 0.140671939 | 0.014404488 |
| SNP_A.K_307336_2_7396717    | 2  | 7396717  | 1.39E-05 | 0.23244 | 299 | 0.140667264 | 0.014407368 |
| SNP_A.K_996278_6_5981197    | 6  | 5981197  | 1.39E-05 | 0.28094 | 299 | 0.140664324 | 0.014407368 |
| SNP_A.K_2079158_12_27061420 | 12 | 27061420 | 1.39E-05 | 0.01505 | 299 | 0.140651251 | 0.014429828 |
| SNP_A.K_1608614_9_20798975  | 9  | 20798975 | 1.40E-05 | 0.23579 | 299 | 0.140600152 | 0.014539041 |
| SNP_A.K_978385_6_1684894    | 6  | 1684894  | 1.40E-05 | 0.25585 | 299 | 0.140586901 | 0.014562126 |
| SNP_A.K_709795_4_8297870    | 4  | 8297870  | 1.41E-05 | 0.07023 | 299 | 0.14056676  | 0.014601069 |
| SNP_A.K_1608630_9_20803874  | 9  | 20803874 | 1.41E-05 | 0.24247 | 299 | 0.14055807  | 0.014609775 |
| SNP_A.K_709572_4_8274312    | 4  | 8274312  | 1.41E-05 | 0.09866 | 299 | 0.140556647 | 0.014609775 |
| SNP_A.K_1005049_6_6966049   | 6  | 6966049  | 1.41E-05 | 0.35117 | 299 | 0.140547813 | 0.014622822 |
| SNP_A.K_1005037_6_6964073   | 6  | 6964073  | 1.42E-05 | 0.29097 | 299 | 0.140539112 | 0.014631304 |
| SNP_A.K_978863_6_1789622    | 6  | 1789622  | 1.42E-05 | 0.31438 | 299 | 0.140537813 | 0.014631304 |
| SNP_A.K_307027_2_7373443    | 2  | 7373443  | 1.42E-05 | 0.25753 | 299 | 0.140520845 | 0.014654701 |
| SNP_A.K_1001443_6_6481781   | 6  | 6481781  | 1.42E-05 | 0.30936 | 299 | 0.1405196   | 0.014654701 |
| SNP_A.K_306713_2_7343894    | 2  | 7343894  | 1.42E-05 | 0.23077 | 299 | 0.140515353 | 0.014654701 |
| SNP_A.K_1004415_6_6880450   | 6  | 6880450  | 1.42E-05 | 0.38294 | 299 | 0.140515047 | 0.014654701 |
| SNP_A.K_990359_6_4712337    | 6  | 4712337  | 1.43E-05 | 0.20569 | 299 | 0.140462045 | 0.014770108 |
| SNP_A.K_1001834_6_6523614   | 6  | 6523614  | 1.44E-05 | 0.31438 | 299 | 0.140450198 | 0.014790342 |
| SNP_A.K_995725_6_5948957    | 6  | 5948957  | 1.44E-05 | 0.49666 | 299 | 0.140442704 | 0.014800468 |
| SNP_A.K_978212_6_1661829    | 6  | 1661829  | 1.44E-05 | 0.17726 | 299 | 0.140438321 | 0.014803354 |
| SNP_A.K_1365031_8_6067247   | 8  | 6067247  | 1.44E-05 | 0.11037 | 299 | 0.140433663 | 0.014806886 |
| SNP_A.K_978898_6_1798756    | 6  | 1798756  | 1.44E-05 | 0.29599 | 299 | 0.14042219  | 0.014826314 |
| SNP_A.K_710033_4_8310218    | 4  | 8310218  | 1.44E-05 | 0.07692 | 299 | 0.140407668 | 0.014852898 |
| SNP_A.K_990384_6_4712968    | 6  | 4712968  | 1.45E-05 | 0.19565 | 299 | 0.140390681 | 0.014885305 |
| SNP_A.K_1577941_9_13755181  | 9  | 13755181 | 1.45E-05 | 0.05017 | 299 | 0.140375891 | 0.014908738 |
| SNP_A.K_1000982_6_6432282   | 6  | 6432282  | 1.45E-05 | 0.33612 | 299 | 0.140374416 | 0.014908738 |
| SNP_A.K_1001480_6_6483261   | 6  | 6483261  | 1.45E-05 | 0.29431 | 299 | 0.140365239 | 0.014922929 |
| SNP_A.K_978399_6_1686955    | 6  | 1686955  | 1.46E-05 | 0.25418 | 299 | 0.140345302 | 0.014958488 |
| SNP_A.K_1001283_6_6461389   | 6  | 6461389  | 1.46E-05 | 0.37291 | 299 | 0.140343857 | 0.014958488 |
| SNP_A.K_1004367_6_6876933   | 6  | 6876933  | 1.46E-05 | 0.36288 | 299 | 0.140320908 | 0.015003818 |
| SNP_A.K_1004806_6_6933539   | 6  | 6933539  | 1.47E-05 | 0.30769 | 299 | 0.140318378 | 0.015003818 |
| SNP_A.K_995303_6_5924486    | 6  | 5924486  | 1.47E-05 | 0.1388  | 299 | 0.140309831 | 0.01501663  |
| SNP_A.K_28907_1_4179493     | 1  | 4179493  | 1.47E-05 | 0.12876 | 299 | 0.140304777 | 0.015021194 |
| SNP_A.K_993622_6_5780207    | 6  | 5780207  | 1.47E-05 | 0.29264 | 299 | 0.140299041 | 0.015022214 |
| SNP_A.K_1001243_6_6457259   | 6  | 6457259  | 1.47E-05 | 0.37124 | 299 | 0.140298105 | 0.015022214 |
| SNP_A.K_678658_4_993423     | 4  | 993423   | 1.47E-05 | 0.06856 | 299 | 0.140292066 | 0.015029122 |
| SNP_A.K_978123_6_1647999    | 6  | 1647999  | 1.47E-05 | 0.27759 | 299 | 0.14028198  | 0.015045617 |
| SNP_A.K_996334_6_5988201    | 6  | 5988201  | 1.48E-05 | 0.21906 | 299 | 0.140269054 | 0.01506887  |
| SNP_A.K_307514_2_7414867    | 2  | 7414867  | 1.48E-05 | 0.43144 | 299 | 0.140261157 | 0.015072848 |
| SNP_A.K_709753_4_8284869    | 4  | 8284869  | 1.48E-05 | 0.08361 | 299 | 0.140261152 | 0.015072848 |
| SNP_A.K_990346_6_4711807    | 6  | 4711807  | 1.48E-05 | 0.14381 | 299 | 0.140254619 | 0.01508097  |
| SNP_A.K_194660_1_30907310   | 1  | 30907310 | 1.48E-05 | 0.45485 | 299 | 0.140244828 | 0.015096841 |
| SNP_A.K_721670_4_11034116   | 4  | 11034116 | 1.49E-05 | 0.06187 | 299 | 0.140231942 | 0.015120099 |

|                             |    |          |          |         |     |             |             |
|-----------------------------|----|----------|----------|---------|-----|-------------|-------------|
| SNP_A.K_1600928_9_18862234  | 9  | 18862234 | 1.49E-05 | 0.14548 | 299 | 0.140220866 | 0.015139081 |
| SNP_A.K_1001270_6_6459969   | 6  | 6459969  | 1.49E-05 | 0.3913  | 299 | 0.140209209 | 0.01515948  |
| SNP_A.K_1004503_6_6894925   | 6  | 6894925  | 1.49E-05 | 0.32274 | 299 | 0.140197739 | 0.015168038 |
| SNP_A.K_1001247_6_6458325   | 6  | 6458325  | 1.49E-05 | 0.37458 | 299 | 0.140196984 | 0.015168038 |
| SNP_A.K_993112_6_5708683    | 6  | 5708683  | 1.49E-05 | 0.15217 | 299 | 0.140196321 | 0.015168038 |
| SNP_A.K_977995_6_1633260    | 6  | 1633260  | 1.49E-05 | 0.25084 | 299 | 0.140192474 | 0.015169827 |
| SNP_A.K_1001241_6_6457118   | 6  | 6457118  | 1.50E-05 | 0.29933 | 299 | 0.140182285 | 0.015179429 |
| SNP_A.K_1432429_8_16500875  | 8  | 16500875 | 1.50E-05 | 0.08361 | 299 | 0.140179756 | 0.015179429 |
| SNP_A.K_1600799_9_18841702  | 9  | 18841702 | 1.50E-05 | 0.13712 | 299 | 0.14017917  | 0.015179429 |
| SNP_A.K_709887_4_8300318    | 4  | 8300318  | 1.50E-05 | 0.07358 | 299 | 0.140171067 | 0.015186588 |
| SNP_A.K_709763_4_8285277    | 4  | 8285277  | 1.50E-05 | 0.08696 | 299 | 0.140169993 | 0.015186588 |
| SNP_A.K_978038_6_1642041    | 6  | 1642041  | 1.50E-05 | 0.20067 | 299 | 0.140156913 | 0.015210495 |
| SNP_A.K_978216_6_1662090    | 6  | 1662090  | 1.51E-05 | 0.1806  | 299 | 0.140113886 | 0.015306444 |
| SNP_A.K_998481_6_6203672    | 6  | 6203672  | 1.51E-05 | 0.15552 | 299 | 0.140109851 | 0.015307177 |
| SNP_A.K_1000932_6_6425020   | 6  | 6425020  | 1.51E-05 | 0.29097 | 299 | 0.140107412 | 0.015307177 |
| SNP_A.K_1004382_6_6878100   | 6  | 6878100  | 1.52E-05 | 0.4097  | 299 | 0.140102678 | 0.01531116  |
| SNP_A.K_1005655_6_7033271   | 6  | 7033271  | 1.52E-05 | 0.27258 | 299 | 0.140091415 | 0.015330897 |
| SNP_A.K_978346_6_1679943    | 6  | 1679943  | 1.52E-05 | 0.25753 | 299 | 0.140078576 | 0.015354475 |
| SNP_A.K_710115_4_8316699    | 4  | 8316699  | 1.52E-05 | 0.08027 | 299 | 0.140073422 | 0.015359496 |
| SNP_A.K_978389_6_1685030    | 6  | 1685030  | 1.53E-05 | 0.25753 | 299 | 0.140063014 | 0.015377238 |
| SNP_A.K_307167_2_7383081    | 2  | 7383081  | 1.53E-05 | 0.25084 | 299 | 0.140054858 | 0.015387044 |
| SNP_A.K_978669_6_1753579    | 6  | 1753579  | 1.53E-05 | 0.27258 | 299 | 0.140052818 | 0.015387044 |
| SNP_A.K_978015_6_1636847    | 6  | 1636847  | 1.53E-05 | 0.25251 | 299 | 0.140047358 | 0.015392831 |
| SNP_A.K_995226_6_5920765    | 6  | 5920765  | 1.54E-05 | 0.12375 | 299 | 0.140012293 | 0.015460553 |
| SNP_A.K_995683_6_5947774    | 6  | 5947774  | 1.54E-05 | 0.301   | 299 | 0.140012243 | 0.015460553 |
| SNP_A.K_978395_6_1686505    | 6  | 1686505  | 1.54E-05 | 0.25585 | 299 | 0.14000873  | 0.015460553 |
| SNP_A.K_978206_6_1660357    | 6  | 1660357  | 1.54E-05 | 0.19064 | 299 | 0.140006602 | 0.015460553 |
| SNP_A.K_709837_4_8299264    | 4  | 8299264  | 1.54E-05 | 0.07191 | 299 | 0.140004145 | 0.015460553 |
| SNP_A.K_978706_6_1769202    | 6  | 1769202  | 1.55E-05 | 0.35117 | 299 | 0.139970065 | 0.015536258 |
| SNP_A.K_1004956_6_6957433   | 6  | 6957433  | 1.55E-05 | 0.35786 | 299 | 0.139946342 | 0.015575207 |
| SNP_A.K_307385_2_7400113    | 2  | 7400113  | 1.55E-05 | 0.25753 | 299 | 0.139945071 | 0.015575207 |
| SNP_A.K_8635_1_1627181      | 1  | 1627181  | 1.55E-05 | 0.01505 | 299 | 0.139944989 | 0.015575207 |
| SNP_A.K_307153_2_7382225    | 2  | 7382225  | 1.56E-05 | 0.23913 | 299 | 0.139931414 | 0.015594239 |
| SNP_A.K_1925869_11_24770827 | 11 | 24770827 | 1.56E-05 | 0.02174 | 299 | 0.139926373 | 0.015594239 |
| SNP_A.K_307048_2_7375415    | 2  | 7375415  | 1.56E-05 | 0.23579 | 299 | 0.139925755 | 0.015594239 |
| SNP_A.K_456446_2_33037529   | 2  | 33037529 | 1.56E-05 | 0.06689 | 299 | 0.139925019 | 0.015594239 |
| SNP_A.K_1001337_6_6466195   | 6  | 6466195  | 1.56E-05 | 0.2893  | 299 | 0.1399202   | 0.015598585 |
| SNP_A.K_1600819_9_18843940  | 9  | 18843940 | 1.56E-05 | 0.12876 | 299 | 0.139914106 | 0.015602184 |
| SNP_A.K_307509_2_7413958    | 2  | 7413958  | 1.56E-05 | 0.43144 | 299 | 0.139912639 | 0.015602184 |
| SNP_A.K_993378_6_5743531    | 6  | 5743531  | 1.56E-05 | 0.09866 | 299 | 0.139901376 | 0.015615375 |
| SNP_A.K_1004085_6_6832717   | 6  | 6832717  | 1.56E-05 | 0.16722 | 299 | 0.139901183 | 0.015615375 |
| SNP_A.K_710385_4_8339488    | 4  | 8339488  | 1.57E-05 | 0.08361 | 299 | 0.139895904 | 0.015620876 |
| SNP_A.K_1003645_6_6752756   | 6  | 6752756  | 1.57E-05 | 0.01338 | 299 | 0.139891061 | 0.015625309 |
| SNP_A.K_978691_6_1764516    | 6  | 1764516  | 1.57E-05 | 0.27592 | 299 | 0.1398874   | 0.015626837 |
| SNP_A.K_1001242_6_6457170   | 6  | 6457170  | 1.57E-05 | 0.29766 | 299 | 0.13988077  | 0.01563568  |
| SNP_A.K_1005322_6_7005978   | 6  | 7005978  | 1.57E-05 | 0.35117 | 299 | 0.139863431 | 0.015670943 |
| SNP_A.K_1001471_6_6482862   | 6  | 6482862  | 1.58E-05 | 0.29264 | 299 | 0.139849505 | 0.015693366 |
| SNP_A.K_1600929_9_18862283  | 9  | 18862283 | 1.58E-05 | 0.14214 | 299 | 0.139848285 | 0.015693366 |
| SNP_A.K_1004225_6_6851835   | 6  | 6851835  | 1.58E-05 | 0.33278 | 299 | 0.139841291 | 0.015703163 |
| SNP_A.K_710475_4_8423968    | 4  | 8423968  | 1.58E-05 | 0.07191 | 299 | 0.139831347 | 0.01571277  |

|                             |    |          |          |         |     |             |             |
|-----------------------------|----|----------|----------|---------|-----|-------------|-------------|
| SNP_A.K_710025_4_8309576    | 4  | 8309576  | 1.58E-05 | 0.07191 | 299 | 0.139831347 | 0.01571277  |
| SNP_A.K_978945_6_1816874    | 6  | 1816874  | 1.58E-05 | 0.30435 | 299 | 0.139824084 | 0.015723258 |
| SNP_A.K_992480_6_5652278    | 6  | 5652278  | 1.59E-05 | 0.10201 | 299 | 0.139807449 | 0.015756999 |
| SNP_A.K_1382670_8_9112847   | 8  | 9112847  | 1.59E-05 | 0.28763 | 299 | 0.139800042 | 0.015767881 |
| SNP_A.K_995818_6_5951679    | 6  | 5951679  | 1.60E-05 | 0.301   | 299 | 0.139749097 | 0.015887371 |
| SNP_A.K_978147_6_1654365    | 6  | 1654365  | 1.60E-05 | 0.17559 | 299 | 0.139745511 | 0.015888783 |
| SNP_A.K_1382762_8_9115992   | 8  | 9115992  | 1.61E-05 | 0.27926 | 299 | 0.13973824  | 0.015899428 |
| SNP_A.K_1005546_6_7022823   | 6  | 7022823  | 1.61E-05 | 0.26087 | 299 | 0.139735013 | 0.01589995  |
| SNP_A.K_978877_6_1793978    | 6  | 1793978  | 1.61E-05 | 0.30936 | 299 | 0.139728365 | 0.015909047 |
| SNP_A.K_1001236_6_6456861   | 6  | 6456861  | 1.61E-05 | 0.29431 | 299 | 0.139721225 | 0.015919386 |
| SNP_A.K_306883_2_7363429    | 2  | 7363429  | 1.61E-05 | 0.27258 | 299 | 0.139707907 | 0.015938945 |
| SNP_A.K_374744_2_17878213   | 2  | 17878213 | 1.61E-05 | 0.05017 | 299 | 0.139707405 | 0.015938945 |
| SNP_A.K_672910_4_298014     | 4  | 298014   | 1.62E-05 | 0.10201 | 299 | 0.139698404 | 0.015953992 |
| SNP_A.K_1005007_6_6961747   | 6  | 6961747  | 1.62E-05 | 0.32609 | 299 | 0.139693292 | 0.015959277 |
| SNP_A.K_990275_6_4704180    | 6  | 4704180  | 1.62E-05 | 0.2107  | 299 | 0.139681921 | 0.015973743 |
| SNP_A.K_978107_6_1647427    | 6  | 1647427  | 1.62E-05 | 0.2592  | 299 | 0.139681526 | 0.015973743 |
| SNP_A.K_1608521_9_20772075  | 9  | 20772075 | 1.62E-05 | 0.28261 | 299 | 0.13966442  | 0.016009274 |
| SNP_A.K_1000582_6_6397565   | 6  | 6397565  | 1.63E-05 | 0.30435 | 299 | 0.139649928 | 0.01603319  |
| SNP_A.K_1004807_6_6933542   | 6  | 6933542  | 1.63E-05 | 0.30602 | 299 | 0.139648939 | 0.01603319  |
| SNP_A.K_1005302_6_7003399   | 6  | 7003399  | 1.63E-05 | 0.25418 | 299 | 0.13964541  | 0.016034524 |
| SNP_A.K_1001359_6_6466728   | 6  | 6466728  | 1.63E-05 | 0.28763 | 299 | 0.139632986 | 0.016058352 |
| SNP_A.K_580861_3_21143949   | 3  | 21143949 | 1.64E-05 | 0.40468 | 299 | 0.139600571 | 0.016132966 |
| SNP_A.K_978217_6_1662107    | 6  | 1662107  | 1.64E-05 | 0.1806  | 299 | 0.139584612 | 0.016161285 |
| SNP_A.K_1830624_11_10571212 | 11 | 10571212 | 1.65E-05 | 0.35117 | 299 | 0.13958345  | 0.016161285 |
| SNP_A.K_307527_2_7415701    | 2  | 7415701  | 1.65E-05 | 0.23579 | 299 | 0.139575045 | 0.016175072 |
| SNP_A.K_1001208_6_6455014   | 6  | 6455014  | 1.65E-05 | 0.37458 | 299 | 0.139559141 | 0.016204429 |
| SNP_A.K_1019445_6_9094776   | 6  | 9094776  | 1.65E-05 | 0.03512 | 299 | 0.139557556 | 0.016204429 |
| SNP_A.K_195113_1_31046295   | 1  | 31046295 | 1.65E-05 | 0.40803 | 299 | 0.139550743 | 0.016214196 |
| SNP_A.K_1607052_9_20264813  | 9  | 20264813 | 1.66E-05 | 0.24916 | 299 | 0.139543637 | 0.016224723 |
| SNP_A.K_978246_6_1664631    | 6  | 1664631  | 1.66E-05 | 0.1806  | 299 | 0.139538406 | 0.016226824 |
| SNP_A.K_737118_4_13970219   | 4  | 13970219 | 1.66E-05 | 0.02508 | 299 | 0.139535418 | 0.016226824 |
| SNP_A.K_1433094_8_16617450  | 8  | 16617450 | 1.66E-05 | 0.08361 | 299 | 0.139533859 | 0.016226824 |
| SNP_A.K_1000926_6_6424491   | 6  | 6424491  | 1.66E-05 | 0.32776 | 299 | 0.139530336 | 0.016228208 |
| SNP_A.K_1005486_6_7016696   | 6  | 7016696  | 1.66E-05 | 0.12375 | 299 | 0.139517382 | 0.016253736 |
| SNP_A.K_1183795_7_4603176   | 7  | 4603176  | 1.66E-05 | 0.06689 | 299 | 0.13951247  | 0.016258688 |
| SNP_A.K_1608475_9_20762236  | 9  | 20762236 | 1.67E-05 | 0.2893  | 299 | 0.139498955 | 0.016285712 |
| SNP_A.K_678442_4_986649     | 4  | 986649   | 1.67E-05 | 0.06187 | 299 | 0.139473297 | 0.016337067 |
| SNP_A.K_1001734_6_6511771   | 6  | 6511771  | 1.67E-05 | 0.30769 | 299 | 0.139473028 | 0.016337067 |
| SNP_A.K_990333_6_4711187    | 6  | 4711187  | 1.68E-05 | 0.20903 | 299 | 0.139461553 | 0.016358974 |
| SNP_A.K_1001338_6_6466197   | 6  | 6466197  | 1.68E-05 | 0.2893  | 299 | 0.139446204 | 0.01639092  |
| SNP_A.K_1830680_11_10574148 | 11 | 10574148 | 1.68E-05 | 0.39632 | 299 | 0.139438861 | 0.016402221 |
| SNP_A.K_307328_2_7395346    | 2  | 7395346  | 1.69E-05 | 0.25585 | 299 | 0.13941029  | 0.016446186 |
| SNP_A.K_483254_3_3232920    | 3  | 3232920  | 1.69E-05 | 0.00334 | 299 | 0.139407048 | 0.016446186 |
| SNP_A.K_758816_4_19381497   | 4  | 19381497 | 1.69E-05 | 0.00334 | 299 | 0.139407048 | 0.016446186 |
| SNP_A.K_1393679_8_10503898  | 8  | 10503898 | 1.69E-05 | 0.00334 | 299 | 0.139407048 | 0.016446186 |
| SNP_A.K_2070141_12_25468009 | 12 | 25468009 | 1.69E-05 | 0.00334 | 299 | 0.139407048 | 0.016446186 |
| SNP_A.K_1004407_6_6879927   | 6  | 6879927  | 1.69E-05 | 0.41137 | 299 | 0.139401241 | 0.016453562 |
| SNP_A.K_1004970_6_6959150   | 6  | 6959150  | 1.70E-05 | 0.31605 | 299 | 0.139389046 | 0.01647753  |
| SNP_A.K_978849_6_1787372    | 6  | 1787372  | 1.70E-05 | 0.42809 | 299 | 0.13937753  | 0.016499772 |
| SNP_A.K_1000924_6_6424130   | 6  | 6424130  | 1.70E-05 | 0.33779 | 299 | 0.139363329 | 0.016529045 |

|                             |    |          |          |         |     |             |             |
|-----------------------------|----|----------|----------|---------|-----|-------------|-------------|
| SNP_A.K_978596_6_1736937    | 6  | 1736937  | 1.71E-05 | 0.27759 | 299 | 0.139350882 | 0.016553796 |
| SNP_A.K_306968_2_7371107    | 2  | 7371107  | 1.71E-05 | 0.25753 | 299 | 0.139344565 | 0.016556101 |
| SNP_A.K_1600845_9_18849267  | 9  | 18849267 | 1.71E-05 | 0.14047 | 299 | 0.139344409 | 0.016556101 |
| SNP_A.K_28912_1_4181491     | 1  | 4181491  | 1.71E-05 | 0.10201 | 299 | 0.139339123 | 0.016561359 |
| SNP_A.K_1001703_6_6506973   | 6  | 6506973  | 1.71E-05 | 0.31271 | 299 | 0.139324503 | 0.016591857 |
| SNP_A.K_307009_2_7372928    | 2  | 7372928  | 1.72E-05 | 0.25753 | 299 | 0.139316132 | 0.016606046 |
| SNP_A.K_1001426_6_6481468   | 6  | 6481468  | 1.72E-05 | 0.29933 | 299 | 0.139306282 | 0.016624127 |
| SNP_A.K_1001613_6_6498392   | 6  | 6498392  | 1.72E-05 | 0.40635 | 299 | 0.139300553 | 0.01663142  |
| SNP_A.K_1263508_7_18652113  | 7  | 18652113 | 1.72E-05 | 0.49164 | 299 | 0.139291909 | 0.016646371 |
| SNP_A.K_725201_4_11762294   | 4  | 11762294 | 1.73E-05 | 0.09197 | 299 | 0.139282052 | 0.016664527 |
| SNP_A.K_1794678_11_5475941  | 11 | 5475941  | 1.73E-05 | 0.43813 | 299 | 0.139276112 | 0.016672406 |
| SNP_A.K_194802_1_30962904   | 1  | 30962904 | 1.73E-05 | 0.49498 | 299 | 0.13926621  | 0.016690715 |
| SNP_A.K_308459_2_7517454    | 2  | 7517454  | 1.73E-05 | 0.26087 | 299 | 0.139261373 | 0.016695708 |
| SNP_A.K_994759_6_5887555    | 6  | 5887555  | 1.74E-05 | 0.29097 | 299 | 0.139239152 | 0.016746551 |
| SNP_A.K_1001301_6_6463227   | 6  | 6463227  | 1.74E-05 | 0.29097 | 299 | 0.139220981 | 0.016773329 |
| SNP_A.K_773092_4_22078266   | 4  | 22078266 | 1.74E-05 | 0.03177 | 299 | 0.139220214 | 0.016773329 |
| SNP_A.K_914842_5_18422620   | 5  | 18422620 | 1.74E-05 | 0.03177 | 299 | 0.139220214 | 0.016773329 |
| SNP_A.K_978807_6_1783373    | 6  | 1783373  | 1.75E-05 | 0.3913  | 299 | 0.139198555 | 0.016817751 |
| SNP_A.K_2078610_12_27000452 | 12 | 27000452 | 1.75E-05 | 0.01672 | 299 | 0.139197578 | 0.016817751 |
| SNP_A.K_1001252_6_6458927   | 6  | 6458927  | 1.75E-05 | 0.29097 | 299 | 0.13919138  | 0.016826421 |
| SNP_A.K_1001084_6_6440036   | 6  | 6440036  | 1.75E-05 | 0.33445 | 299 | 0.139183284 | 0.01684014  |
| SNP_A.K_1004916_6_6952374   | 6  | 6952374  | 1.75E-05 | 0.31605 | 299 | 0.139174191 | 0.016856525 |
| SNP_A.K_1004362_6_6876460   | 6  | 6876460  | 1.76E-05 | 0.32107 | 299 | 0.13915259  | 0.016904203 |
| SNP_A.K_1001358_6_6466717   | 6  | 6466717  | 1.76E-05 | 0.29097 | 299 | 0.139150432 | 0.016904203 |
| SNP_A.K_1004618_6_6910879   | 6  | 6910879  | 1.77E-05 | 0.3194  | 299 | 0.139134094 | 0.016940005 |
| SNP_A.K_679337_4_1073273    | 4  | 1073273  | 1.77E-05 | 0.04348 | 299 | 0.139127974 | 0.016948554 |
| SNP_A.K_1608534_9_20772805  | 9  | 20772805 | 1.77E-05 | 0.30936 | 299 | 0.139109384 | 0.016990493 |
| SNP_A.K_996661_6_6015678    | 6  | 6015678  | 1.78E-05 | 0.48161 | 299 | 0.139078692 | 0.017065085 |
| SNP_A.K_326667_2_10037678   | 2  | 10037678 | 1.78E-05 | 0.06689 | 299 | 0.139073088 | 0.017072318 |
| SNP_A.K_1608728_9_20820729  | 9  | 20820729 | 1.79E-05 | 0.31438 | 299 | 0.139050745 | 0.017124716 |
| SNP_A.K_307170_2_7383164    | 2  | 7383164  | 1.79E-05 | 0.23913 | 299 | 0.139043096 | 0.017137509 |
| SNP_A.K_990334_6_4711194    | 6  | 4711194  | 1.80E-05 | 0.20903 | 299 | 0.139028149 | 0.017169842 |
| SNP_A.K_326860_2_10061629   | 2  | 10061629 | 1.80E-05 | 0.06187 | 299 | 0.139025323 | 0.017169842 |
| SNP_A.K_306820_2_7355642    | 2  | 7355642  | 1.81E-05 | 0.23913 | 299 | 0.138994046 | 0.017246848 |
| SNP_A.K_978827_6_1786554    | 6  | 1786554  | 1.81E-05 | 0.38796 | 299 | 0.138984672 | 0.017264447 |
| SNP_A.K_977952_6_1624213    | 6  | 1624213  | 1.81E-05 | 0.20903 | 299 | 0.138978311 | 0.017273856 |
| SNP_A.K_1831308_11_10618138 | 11 | 10618138 | 1.82E-05 | 0.13043 | 299 | 0.138933487 | 0.017383489 |
| SNP_A.K_995838_6_5952331    | 6  | 5952331  | 1.82E-05 | 0.29933 | 299 | 0.138932399 | 0.017383489 |
| SNP_A.K_978888_6_1796720    | 6  | 1796720  | 1.83E-05 | 0.3194  | 299 | 0.138902069 | 0.017458874 |
| SNP_A.K_978654_6_1750520    | 6  | 1750520  | 1.83E-05 | 0.29097 | 299 | 0.138891967 | 0.01747304  |
| SNP_A.K_2068321_12_24995670 | 12 | 24995670 | 1.84E-05 | 0.02174 | 299 | 0.138891128 | 0.01747304  |
| SNP_A.K_277981_2_2983844    | 2  | 2983844  | 1.85E-05 | 0.06856 | 299 | 0.138852401 | 0.017572099 |
| SNP_A.K_307458_2_7408644    | 2  | 7408644  | 1.85E-05 | 0.25585 | 299 | 0.138849332 | 0.017572575 |
| SNP_A.K_978463_6_1696139    | 6  | 1696139  | 1.85E-05 | 0.25585 | 299 | 0.138833667 | 0.017606352 |
| SNP_A.K_1608561_9_20777961  | 9  | 20777961 | 1.85E-05 | 0.25084 | 299 | 0.138831372 | 0.017606352 |
| SNP_A.K_1953761_12_3627549  | 12 | 3627549  | 1.86E-05 | 0.05351 | 299 | 0.138809929 | 0.017657963 |
| SNP_A.K_978371_6_1682730    | 6  | 1682730  | 1.86E-05 | 0.2592  | 299 | 0.138803465 | 0.017667921 |
| SNP_A.K_1600851_9_18851906  | 9  | 18851906 | 1.86E-05 | 0.12542 | 299 | 0.138796245 | 0.017674589 |
| SNP_A.K_978938_6_1814552    | 6  | 1814552  | 1.86E-05 | 0.31605 | 299 | 0.138795295 | 0.017674589 |
| SNP_A.K_1857590_11_14815205 | 11 | 14815205 | 1.86E-05 | 0.02676 | 299 | 0.138792049 | 0.017675588 |

|                             |    |          |          |         |     |             |             |
|-----------------------------|----|----------|----------|---------|-----|-------------|-------------|
| SNP_A.K_993237_6_5723448    | 6  | 5723448  | 1.87E-05 | 0.47826 | 299 | 0.138785565 | 0.017681605 |
| SNP_A.K_995851_6_5952494    | 6  | 5952494  | 1.87E-05 | 0.48495 | 299 | 0.138783937 | 0.017681605 |
| SNP_A.K_1001477_6_6483102   | 6  | 6483102  | 1.87E-05 | 0.29097 | 299 | 0.138773647 | 0.017681605 |
| SNP_A.K_1001476_6_6483093   | 6  | 6483093  | 1.87E-05 | 0.29097 | 299 | 0.138773647 | 0.017681605 |
| SNP_A.K_992585_6_5659711    | 6  | 5659711  | 1.87E-05 | 0.49331 | 299 | 0.138772595 | 0.017681605 |
| SNP_A.K_992584_6_5659709    | 6  | 5659709  | 1.87E-05 | 0.49331 | 299 | 0.138772595 | 0.017681605 |
| SNP_A.K_977993_6_1632138    | 6  | 1632138  | 1.88E-05 | 0.25251 | 299 | 0.138727582 | 0.017799573 |
| SNP_A.K_1001250_6_6458797   | 6  | 6458797  | 1.88E-05 | 0.37793 | 299 | 0.138721923 | 0.017806034 |
| SNP_A.K_1000978_6_6431297   | 6  | 6431297  | 1.89E-05 | 0.33278 | 299 | 0.138719531 | 0.017806034 |
| SNP_A.K_993887_6_5799400    | 6  | 5799400  | 1.89E-05 | 0.17893 | 299 | 0.138711485 | 0.017811549 |
| SNP_A.K_923810_5_19502424   | 5  | 19502424 | 1.89E-05 | 0.02843 | 299 | 0.138709157 | 0.017811549 |
| SNP_A.K_1004942_6_6956596   | 6  | 6956596  | 1.89E-05 | 0.29766 | 299 | 0.13870895  | 0.017811549 |
| SNP_A.K_308573_2_7527333    | 2  | 7527333  | 1.89E-05 | 0.2107  | 299 | 0.138696134 | 0.017839532 |
| SNP_A.K_978652_6_1750477    | 6  | 1750477  | 1.90E-05 | 0.27592 | 299 | 0.138685315 | 0.01786193  |
| SNP_A.K_1000748_6_6414480   | 6  | 6414480  | 1.90E-05 | 0.29097 | 299 | 0.138667935 | 0.017902894 |
| SNP_A.K_710549_4_8426985    | 4  | 8426985  | 1.90E-05 | 0.10535 | 299 | 0.138664009 | 0.017905889 |
| SNP_A.K_1925432_11_24737276 | 11 | 24737276 | 1.91E-05 | 0.02174 | 299 | 0.138642218 | 0.017958864 |
| SNP_A.K_1600886_9_18859623  | 9  | 18859623 | 1.91E-05 | 0.1388  | 299 | 0.138639566 | 0.017958864 |
| SNP_A.K_725250_4_11767812   | 4  | 11767812 | 1.91E-05 | 0.09866 | 299 | 0.138624337 | 0.017993956 |
| SNP_A.K_2067441_12_24765123 | 12 | 24765123 | 1.92E-05 | 0.04181 | 299 | 0.138619819 | 0.017998665 |
| SNP_A.K_306846_2_7359890    | 2  | 7359890  | 1.92E-05 | 0.27425 | 299 | 0.138605099 | 0.018026192 |
| SNP_A.K_1183398_7_4540222   | 7  | 4540222  | 1.92E-05 | 0.3796  | 299 | 0.13860442  | 0.018026192 |
| SNP_A.K_678978_4_1020672    | 4  | 1020672  | 1.92E-05 | 0.0301  | 299 | 0.138600603 | 0.018028926 |
| SNP_A.K_1608651_9_20810430  | 9  | 20810430 | 1.93E-05 | 0.30769 | 299 | 0.138586484 | 0.018058992 |
| SNP_A.K_1389904_8_10134749  | 8  | 10134749 | 1.93E-05 | 0.04849 | 299 | 0.138584338 | 0.018058992 |
| SNP_A.K_1001475_6_6483066   | 6  | 6483066  | 1.93E-05 | 0.29264 | 299 | 0.13857876  | 0.018066765 |
| SNP_A.K_978218_6_1662157    | 6  | 1662157  | 1.93E-05 | 0.19064 | 299 | 0.138562887 | 0.018103941 |
| SNP_A.K_1600723_9_18826389  | 9  | 18826389 | 1.93E-05 | 0.15385 | 299 | 0.138558299 | 0.01810891  |
| SNP_A.K_1389983_8_10141955  | 8  | 10141955 | 1.94E-05 | 0.05351 | 299 | 0.138543708 | 0.018136658 |
| SNP_A.K_196605_1_31436461   | 1  | 31436461 | 1.94E-05 | 0.47324 | 299 | 0.138541565 | 0.018136658 |
| SNP_A.K_1600786_9_18837702  | 9  | 18837702 | 1.94E-05 | 0.16054 | 299 | 0.138540058 | 0.018136658 |
| SNP_A.K_725829_4_11867677   | 4  | 11867677 | 1.95E-05 | 0.0903  | 299 | 0.138521572 | 0.018181503 |
| SNP_A.K_709970_4_8303846    | 4  | 8303846  | 1.96E-05 | 0.07023 | 299 | 0.13848457  | 0.018236058 |
| SNP_A.K_709972_4_8303874    | 4  | 8303874  | 1.96E-05 | 0.07023 | 299 | 0.13848457  | 0.018236058 |
| SNP_A.K_709789_4_8297798    | 4  | 8297798  | 1.96E-05 | 0.07023 | 299 | 0.13848457  | 0.018236058 |
| SNP_A.K_709815_4_8298327    | 4  | 8298327  | 1.96E-05 | 0.07023 | 299 | 0.13848457  | 0.018236058 |
| SNP_A.K_710479_4_8424176    | 4  | 8424176  | 1.96E-05 | 0.07023 | 299 | 0.13848457  | 0.018236058 |
| SNP_A.K_978381_6_1684625    | 6  | 1684625  | 1.96E-05 | 0.26756 | 299 | 0.138483965 | 0.018236058 |
| SNP_A.K_1600954_9_18866383  | 9  | 18866383 | 1.96E-05 | 0.13211 | 299 | 0.138482719 | 0.018236058 |
| SNP_A.K_307808_2_7448965    | 2  | 7448965  | 1.96E-05 | 0.47157 | 299 | 0.138470189 | 0.018259048 |
| SNP_A.K_307246_2_7387872    | 2  | 7387872  | 1.96E-05 | 0.24916 | 299 | 0.138469072 | 0.018259048 |
| SNP_A.K_977896_6_1616444    | 6  | 1616444  | 1.97E-05 | 0.15886 | 299 | 0.138456112 | 0.018288271 |
| SNP_A.K_1608537_9_20773129  | 9  | 20773129 | 1.97E-05 | 0.3194  | 299 | 0.138450403 | 0.018296587 |
| SNP_A.K_1608517_9_20770921  | 9  | 20770921 | 1.97E-05 | 0.29766 | 299 | 0.138446862 | 0.018298643 |
| SNP_A.K_672649_4_268874     | 4  | 268874   | 1.97E-05 | 0.10368 | 299 | 0.138443022 | 0.018301569 |
| SNP_A.K_978715_6_1770024    | 6  | 1770024  | 1.97E-05 | 0.30936 | 299 | 0.13843342  | 0.018321158 |
| SNP_A.K_1001445_6_6481844   | 6  | 6481844  | 1.97E-05 | 0.30602 | 299 | 0.138427661 | 0.018328901 |
| SNP_A.K_978185_6_1658471    | 6  | 1658471  | 1.98E-05 | 0.2592  | 299 | 0.138425095 | 0.018328901 |
| SNP_A.K_307086_2_7378350    | 2  | 7378350  | 1.98E-05 | 0.4097  | 299 | 0.138418638 | 0.018339424 |
| SNP_A.K_992003_6_5607940    | 6  | 5607940  | 1.98E-05 | 0.18896 | 299 | 0.138403726 | 0.018374471 |

|                            |   |          |          |         |     |             |             |
|----------------------------|---|----------|----------|---------|-----|-------------|-------------|
| SNP_A.K_307061_2_7376491   | 2 | 7376491  | 1.98E-05 | 0.23077 | 299 | 0.13839961  | 0.018378233 |
| SNP_A.K_1001746_6_6513819  | 6 | 6513819  | 1.99E-05 | 0.30936 | 299 | 0.138373621 | 0.018445603 |
| SNP_A.K_978170_6_1657659   | 6 | 1657659  | 1.99E-05 | 0.19732 | 299 | 0.138363987 | 0.018459544 |
| SNP_A.K_978620_6_1745032   | 6 | 1745032  | 2.00E-05 | 0.27759 | 299 | 0.138361244 | 0.018459544 |
| SNP_A.K_978232_6_1663253   | 6 | 1663253  | 2.00E-05 | 0.16388 | 299 | 0.138359006 | 0.018459544 |
| SNP_A.K_306845_2_7359597   | 2 | 7359597  | 2.00E-05 | 0.26087 | 299 | 0.13835499  | 0.018459544 |
| SNP_A.K_977882_6_1611020   | 6 | 1611020  | 2.00E-05 | 0.23077 | 299 | 0.138353194 | 0.018459544 |
| SNP_A.K_673336_4_349555    | 4 | 349555   | 2.00E-05 | 0.08027 | 299 | 0.138351951 | 0.018459544 |
| SNP_A.K_173304_1_27886048  | 1 | 27886048 | 2.00E-05 | 0.02007 | 299 | 0.138339284 | 0.018475066 |
| SNP_A.K_978901_6_1799707   | 6 | 1799707  | 2.00E-05 | 0.31271 | 299 | 0.138339272 | 0.018475066 |
| SNP_A.K_306742_2_7347142   | 2 | 7347142  | 2.00E-05 | 0.24415 | 299 | 0.138338204 | 0.018475066 |
| SNP_A.K_678915_4_1007842   | 4 | 1007842  | 2.00E-05 | 0.02843 | 299 | 0.13833249  | 0.018482703 |
| SNP_A.K_726139_4_11919898  | 4 | 11919898 | 2.00E-05 | 0.09365 | 299 | 0.138329976 | 0.018482703 |
| SNP_A.K_709573_4_8274315   | 4 | 8274315  | 2.01E-05 | 0.10033 | 299 | 0.138311166 | 0.018526017 |
| SNP_A.K_996216_6_5975664   | 6 | 5975664  | 2.01E-05 | 0.15886 | 299 | 0.13830955  | 0.018526017 |
| SNP_A.K_247987_1_40109178  | 1 | 40109178 | 2.01E-05 | 0.02341 | 299 | 0.138305238 | 0.018528647 |
| SNP_A.K_306874_2_7362893   | 2 | 7362893  | 2.01E-05 | 0.23913 | 299 | 0.13830305  | 0.018528647 |
| SNP_A.K_321179_2_8956660   | 2 | 8956660  | 2.02E-05 | 0.03679 | 299 | 0.138292303 | 0.018551925 |
| SNP_A.K_413974_2_23757310  | 2 | 23757310 | 2.02E-05 | 0.05351 | 299 | 0.138278893 | 0.018576411 |
| SNP_A.K_978033_6_1641241   | 6 | 1641241  | 2.02E-05 | 0.20234 | 299 | 0.1382767   | 0.018576411 |
| SNP_A.K_307254_2_7388069   | 2 | 7388069  | 2.02E-05 | 0.26756 | 299 | 0.138275565 | 0.018576411 |
| SNP_A.K_456482_2_33043765  | 2 | 33043765 | 2.03E-05 | 0.06689 | 299 | 0.138248186 | 0.018648691 |
| SNP_A.K_1371601_8_7858209  | 8 | 7858209  | 2.03E-05 | 0.01338 | 299 | 0.138242041 | 0.018653432 |
| SNP_A.K_1431482_8_16377860 | 8 | 16377860 | 2.03E-05 | 0.13712 | 299 | 0.138239155 | 0.018653432 |
| SNP_A.K_526222_3_10849783  | 3 | 10849783 | 2.03E-05 | 0.01338 | 299 | 0.138236426 | 0.018653432 |
| SNP_A.K_726193_4_11927469  | 4 | 11927469 | 2.04E-05 | 0.09866 | 299 | 0.138235416 | 0.018653432 |
| SNP_A.K_978061_6_1644579   | 6 | 1644579  | 2.04E-05 | 0.18562 | 299 | 0.138229308 | 0.01866322  |
| SNP_A.K_326354_2_9993240   | 2 | 9993240  | 2.05E-05 | 0.0786  | 299 | 0.138197113 | 0.018748472 |
| SNP_A.K_710121_4_8317314   | 4 | 8317314  | 2.05E-05 | 0.11371 | 299 | 0.138194625 | 0.018748472 |
| SNP_A.K_978678_6_1758589   | 6 | 1758589  | 2.05E-05 | 0.30602 | 299 | 0.138192104 | 0.018748472 |
| SNP_A.K_1005547_6_7022827  | 6 | 7022827  | 2.06E-05 | 0.26254 | 299 | 0.138158388 | 0.01884032  |
| SNP_A.K_710485_4_8424659   | 4 | 8424659  | 2.06E-05 | 0.07023 | 299 | 0.138149211 | 0.018851088 |
| SNP_A.K_709822_4_8298510   | 4 | 8298510  | 2.06E-05 | 0.07023 | 299 | 0.138149211 | 0.018851088 |
| SNP_A.K_1608577_9_20788929 | 9 | 20788929 | 2.07E-05 | 0.24582 | 299 | 0.138142924 | 0.018861544 |
| SNP_A.K_1001261_6_6459730  | 6 | 6459730  | 2.07E-05 | 0.3796  | 299 | 0.138137781 | 0.018867751 |
| SNP_A.K_1004288_6_6862878  | 6 | 6862878  | 2.07E-05 | 0.33612 | 299 | 0.138135289 | 0.018867751 |
| SNP_A.K_456492_2_33047027  | 2 | 33047027 | 2.07E-05 | 0.07023 | 299 | 0.138128276 | 0.01888039  |
| SNP_A.K_978682_6_1760469   | 6 | 1760469  | 2.07E-05 | 0.3495  | 299 | 0.13812048  | 0.018895378 |
| SNP_A.K_1001303_6_6463326  | 6 | 6463326  | 2.08E-05 | 0.30268 | 299 | 0.138110992 | 0.01891544  |
| SNP_A.K_726266_4_11932060  | 4 | 11932060 | 2.08E-05 | 0.09699 | 299 | 0.138089721 | 0.018970811 |
| SNP_A.K_1004491_6_6891800  | 6 | 6891800  | 2.09E-05 | 0.3194  | 299 | 0.138080739 | 0.018989444 |
| SNP_A.K_1600935_9_18862680 | 9 | 18862680 | 2.09E-05 | 0.13378 | 299 | 0.13806202  | 0.019037363 |
| SNP_A.K_1001552_6_6490436  | 6 | 6490436  | 2.10E-05 | 0.29264 | 299 | 0.138051782 | 0.019059854 |
| SNP_A.K_1004814_6_6933844  | 6 | 6933844  | 2.10E-05 | 0.31104 | 299 | 0.138035747 | 0.01909986  |
| SNP_A.K_1600755_9_18833875 | 9 | 18833875 | 2.11E-05 | 0.13545 | 299 | 0.138010894 | 0.019166644 |
| SNP_A.K_709824_4_8298546   | 4 | 8298546  | 2.11E-05 | 0.07191 | 299 | 0.138007703 | 0.019167941 |
| SNP_A.K_1001350_6_6466490  | 6 | 6466490  | 2.12E-05 | 0.29431 | 299 | 0.137990775 | 0.019202507 |
| SNP_A.K_685936_4_2520135   | 4 | 2520135  | 2.12E-05 | 0.06522 | 299 | 0.137989952 | 0.019202507 |
| SNP_A.K_278114_2_3027804   | 2 | 3027804  | 2.12E-05 | 0.11538 | 299 | 0.137988021 | 0.019202507 |
| SNP_A.K_990278_6_4704331   | 6 | 4704331  | 2.12E-05 | 0.19064 | 299 | 0.137977654 | 0.019225534 |

|                             |    |          |          |         |     |             |             |
|-----------------------------|----|----------|----------|---------|-----|-------------|-------------|
| SNP_A.K_1389975_8_10140363  | 8  | 10140363 | 2.12E-05 | 0.05184 | 299 | 0.137972532 | 0.019225534 |
| SNP_A.K_513667_3_8307268    | 3  | 8307268  | 2.12E-05 | 0.02508 | 299 | 0.137972168 | 0.019225534 |
| SNP_A.K_1726549_10_16598195 | 10 | 16598195 | 2.14E-05 | 0.05686 | 299 | 0.137917181 | 0.019384898 |
| SNP_A.K_456435_2_33036164   | 2  | 33036164 | 2.15E-05 | 0.07023 | 299 | 0.137899963 | 0.019429267 |
| SNP_A.K_307517_2_7414933    | 2  | 7414933  | 2.16E-05 | 0.43645 | 299 | 0.137858234 | 0.019549338 |
| SNP_A.K_1608523_9_20772268  | 9  | 20772268 | 2.16E-05 | 0.28595 | 299 | 0.137849235 | 0.019568657 |
| SNP_A.K_710386_4_8339494    | 4  | 8339494  | 2.17E-05 | 0.08361 | 299 | 0.137840931 | 0.019585849 |
| SNP_A.K_977894_6_1616300    | 6  | 1616300  | 2.17E-05 | 0.24415 | 299 | 0.137818401 | 0.01964719  |
| SNP_A.K_1001202_6_6454837   | 6  | 6454837  | 2.18E-05 | 0.38796 | 299 | 0.137804733 | 0.019681141 |
| SNP_A.K_1000966_6_6428623   | 6  | 6428623  | 2.19E-05 | 0.35953 | 299 | 0.137781069 | 0.019746335 |
| SNP_A.K_710462_4_8422304    | 4  | 8422304  | 2.19E-05 | 0.09365 | 299 | 0.13776692  | 0.019781971 |
| SNP_A.K_990269_6_4703881    | 6  | 4703881  | 2.21E-05 | 0.19565 | 299 | 0.137719904 | 0.019920923 |
| SNP_A.K_995031_6_5912817    | 6  | 5912817  | 2.21E-05 | 0.16722 | 299 | 0.137714811 | 0.01992833  |
| SNP_A.K_1004788_6_6932381   | 6  | 6932381  | 2.21E-05 | 0.33445 | 299 | 0.137710131 | 0.019934447 |
| SNP_A.K_1001196_6_6454626   | 6  | 6454626  | 2.23E-05 | 0.3194  | 299 | 0.137670765 | 0.020050226 |
| SNP_A.K_978060_6_1644571    | 6  | 1644571  | 2.23E-05 | 0.18729 | 299 | 0.137656622 | 0.020086419 |
| SNP_A.K_978471_6_1697015    | 6  | 1697015  | 2.23E-05 | 0.26756 | 299 | 0.137651297 | 0.020094645 |
| SNP_A.K_312076_2_7903907    | 2  | 7903907  | 2.24E-05 | 0.27592 | 299 | 0.137632158 | 0.020146838 |
| SNP_A.K_1001307_6_6463602   | 6  | 6463602  | 2.24E-05 | 0.29933 | 299 | 0.137628025 | 0.020151296 |
| SNP_A.K_525231_3_10652553   | 3  | 10652553 | 2.24E-05 | 0.01171 | 299 | 0.137618181 | 0.020162771 |
| SNP_A.K_997787_6_6147326    | 6  | 6147326  | 2.25E-05 | 0.14214 | 299 | 0.137611557 | 0.020162771 |
| SNP_A.K_1371659_8_7863147   | 8  | 7863147  | 2.25E-05 | 0.02676 | 299 | 0.13760999  | 0.020162771 |
| SNP_A.K_978426_6_1689652    | 6  | 1689652  | 2.25E-05 | 0.28428 | 299 | 0.137598207 | 0.020162771 |
| SNP_A.K_995138_6_5916987    | 6  | 5916987  | 2.25E-05 | 0.44816 | 299 | 0.137591515 | 0.020162771 |
| SNP_A.K_307081_2_7378298    | 2  | 7378298  | 2.25E-05 | 0.24749 | 299 | 0.137588904 | 0.020162771 |
| SNP_A.K_477471_3_1827167    | 3  | 1827167  | 2.26E-05 | 0.01003 | 299 | 0.137578099 | 0.020162771 |
| SNP_A.K_1804384_11_7066211  | 11 | 7066211  | 2.26E-05 | 0.01003 | 299 | 0.137578099 | 0.020162771 |
| SNP_A.K_1804390_11_7066400  | 11 | 7066400  | 2.26E-05 | 0.01003 | 299 | 0.137578099 | 0.020162771 |
| SNP_A.K_1805586_11_7213751  | 11 | 7213751  | 2.26E-05 | 0.01003 | 299 | 0.137578099 | 0.020162771 |
| SNP_A.K_1803419_11_6912490  | 11 | 6912490  | 2.26E-05 | 0.01003 | 299 | 0.137578099 | 0.020162771 |
| SNP_A.K_1804371_11_7064881  | 11 | 7064881  | 2.26E-05 | 0.01003 | 299 | 0.137578099 | 0.020162771 |
| SNP_A.K_1804392_11_7066673  | 11 | 7066673  | 2.26E-05 | 0.01003 | 299 | 0.137578099 | 0.020162771 |
| SNP_A.K_1804556_11_7086080  | 11 | 7086080  | 2.26E-05 | 0.01003 | 299 | 0.137578099 | 0.020162771 |
| SNP_A.K_1805532_11_7199542  | 11 | 7199542  | 2.26E-05 | 0.01003 | 299 | 0.137578099 | 0.020162771 |
| SNP_A.K_1805590_11_7215506  | 11 | 7215506  | 2.26E-05 | 0.01003 | 299 | 0.137578099 | 0.020162771 |
| SNP_A.K_907830_5_17459266   | 5  | 17459266 | 2.26E-05 | 0.04682 | 299 | 0.137577455 | 0.020162771 |
| SNP_A.K_1001185_6_6453015   | 6  | 6453015  | 2.26E-05 | 0.28094 | 299 | 0.137574274 | 0.020162771 |
| SNP_A.K_307391_2_7400428    | 2  | 7400428  | 2.26E-05 | 0.24916 | 299 | 0.137571924 | 0.020162771 |
| SNP_A.K_709910_4_8301630    | 4  | 8301630  | 2.26E-05 | 0.07191 | 299 | 0.137570005 | 0.020162771 |
| SNP_A.K_306924_2_7368454    | 2  | 7368454  | 2.27E-05 | 0.28428 | 299 | 0.137550182 | 0.020192058 |
| SNP_A.K_456485_2_33044400   | 2  | 33044400 | 2.27E-05 | 0.07023 | 299 | 0.137550091 | 0.020192058 |
| SNP_A.K_307088_2_7378360    | 2  | 7378360  | 2.27E-05 | 0.4097  | 299 | 0.137548183 | 0.020192058 |
| SNP_A.K_709765_4_8285352    | 4  | 8285352  | 2.27E-05 | 0.0903  | 299 | 0.137546027 | 0.020192058 |
| SNP_A.K_1389979_8_10141545  | 8  | 10141545 | 2.27E-05 | 0.05017 | 299 | 0.137545636 | 0.020192058 |
| SNP_A.K_527065_3_11050383   | 3  | 11050383 | 2.27E-05 | 0.01338 | 299 | 0.137543443 | 0.020192058 |
| SNP_A.K_307289_2_7391398    | 2  | 7391398  | 2.27E-05 | 0.2592  | 299 | 0.137541892 | 0.020192058 |
| SNP_A.K_978806_6_1783005    | 6  | 1783005  | 2.28E-05 | 0.40301 | 299 | 0.13750833  | 0.020290859 |
| SNP_A.K_995205_6_5919314    | 6  | 5919314  | 2.29E-05 | 0.33278 | 299 | 0.13750247  | 0.020292759 |
| SNP_A.K_709691_4_8281401    | 4  | 8281401  | 2.29E-05 | 0.08696 | 299 | 0.137502341 | 0.020292759 |
| SNP_A.K_725251_4_11767851   | 4  | 11767851 | 2.29E-05 | 0.09866 | 299 | 0.137496979 | 0.020292881 |

|                             |    |          |          |         |     |             |             |
|-----------------------------|----|----------|----------|---------|-----|-------------|-------------|
| SNP_A.K_1001101_6_6441961   | 6  | 6441961  | 2.29E-05 | 0.38294 | 299 | 0.13749691  | 0.020292881 |
| SNP_A.K_978357_6_1681604    | 6  | 1681604  | 2.29E-05 | 0.29097 | 299 | 0.137493816 | 0.020294164 |
| SNP_A.K_996769_6_6025039    | 6  | 6025039  | 2.29E-05 | 0.17057 | 299 | 0.137481521 | 0.02032501  |
| SNP_A.K_263557_1_42826008   | 1  | 42826008 | 2.29E-05 | 0.00167 | 299 | 0.137478554 | 0.020325894 |
| SNP_A.K_978096_6_1647087    | 6  | 1647087  | 2.30E-05 | 0.18227 | 299 | 0.13746739  | 0.020353154 |
| SNP_A.K_1432892_8_16594308  | 8  | 16594308 | 2.31E-05 | 0.08528 | 299 | 0.137437204 | 0.020441869 |
| SNP_A.K_710463_4_8422319    | 4  | 8422319  | 2.31E-05 | 0.09197 | 299 | 0.137424169 | 0.020475353 |
| SNP_A.K_725491_4_11817067   | 4  | 11817067 | 2.31E-05 | 0.09866 | 299 | 0.137420653 | 0.020478039 |
| SNP_A.K_2073409_12_26025908 | 12 | 26025908 | 2.32E-05 | 0.02676 | 299 | 0.13741393  | 0.02049112  |
| SNP_A.K_1001467_6_6482727   | 6  | 6482727  | 2.32E-05 | 0.29264 | 299 | 0.13740637  | 0.020506928 |
| SNP_A.K_1608498_9_20765459  | 9  | 20765459 | 2.33E-05 | 0.30435 | 299 | 0.137391774 | 0.02054561  |
| SNP_A.K_908259_5_17494747   | 5  | 17494747 | 2.33E-05 | 0.02174 | 299 | 0.1373877   | 0.020550134 |
| SNP_A.K_2071311_12_25697089 | 12 | 25697089 | 2.33E-05 | 0.07023 | 299 | 0.137384063 | 0.020551379 |
| SNP_A.K_725359_4_11798174   | 4  | 11798174 | 2.33E-05 | 0.11037 | 299 | 0.137381956 | 0.020551379 |
| SNP_A.K_1830597_11_10569405 | 11 | 10569405 | 2.33E-05 | 0.40468 | 299 | 0.137369376 | 0.020577835 |
| SNP_A.K_1608746_9_20829513  | 9  | 20829513 | 2.33E-05 | 0.26087 | 299 | 0.137368467 | 0.020577835 |
| SNP_A.K_978611_6_1741111    | 6  | 1741111  | 2.35E-05 | 0.28763 | 299 | 0.137336856 | 0.020663875 |
| SNP_A.K_1608657_9_20811030  | 9  | 20811030 | 2.35E-05 | 0.2592  | 299 | 0.137336742 | 0.020663875 |
| SNP_A.K_86123_1_11757862    | 1  | 11757862 | 2.35E-05 | 0.23913 | 299 | 0.137323988 | 0.020696853 |
| SNP_A.K_978016_6_1637153    | 6  | 1637153  | 2.35E-05 | 0.16054 | 299 | 0.137316963 | 0.020711108 |
| SNP_A.K_978380_6_1684543    | 6  | 1684543  | 2.36E-05 | 0.26421 | 299 | 0.137311334 | 0.020720803 |
| SNP_A.K_994834_6_5893355    | 6  | 5893355  | 2.36E-05 | 0.40635 | 299 | 0.137287122 | 0.020791546 |
| SNP_A.K_977991_6_1631305    | 6  | 1631305  | 2.37E-05 | 0.16054 | 299 | 0.137267979 | 0.020845811 |
| SNP_A.K_307986_2_7461417    | 2  | 7461417  | 2.38E-05 | 0.46823 | 299 | 0.137253546 | 0.020884653 |
| SNP_A.K_1000961_6_6427421   | 6  | 6427421  | 2.39E-05 | 0.33445 | 299 | 0.137218541 | 0.020988751 |
| SNP_A.K_1600748_9_18831447  | 9  | 18831447 | 2.39E-05 | 0.14047 | 299 | 0.137216793 | 0.020988751 |
| SNP_A.K_1001503_6_6484980   | 6  | 6484980  | 2.39E-05 | 0.32107 | 299 | 0.137212016 | 0.020995768 |
| SNP_A.K_1001370_6_6471406   | 6  | 6471406  | 2.40E-05 | 0.29264 | 299 | 0.137204644 | 0.021011418 |
| SNP_A.K_1004448_6_6883190   | 6  | 6883190  | 2.41E-05 | 0.48328 | 299 | 0.137174964 | 0.02109289  |
| SNP_A.K_752428_4_17906030   | 4  | 17906030 | 2.41E-05 | 0.06355 | 299 | 0.137172206 | 0.02109289  |
| SNP_A.K_752429_4_17906042   | 4  | 17906042 | 2.41E-05 | 0.06355 | 299 | 0.137172206 | 0.02109289  |
| SNP_A.K_990324_6_4710649    | 6  | 4710649  | 2.41E-05 | 0.19732 | 299 | 0.137165186 | 0.021107452 |
| SNP_A.K_679324_4_1072950    | 4  | 1072950  | 2.41E-05 | 0.03512 | 299 | 0.137158933 | 0.021119467 |
| SNP_A.K_993958_6_5802505    | 6  | 5802505  | 2.42E-05 | 0.23411 | 299 | 0.137145003 | 0.02115718  |
| SNP_A.K_1004866_6_6937792   | 6  | 6937792  | 2.42E-05 | 0.32943 | 299 | 0.137129057 | 0.021201731 |
| SNP_A.K_673117_4_318549     | 4  | 318549   | 2.43E-05 | 0.04013 | 299 | 0.137124027 | 0.021202411 |
| SNP_A.K_306781_2_7350003    | 2  | 7350003  | 2.43E-05 | 0.26087 | 299 | 0.137121191 | 0.021202411 |
| SNP_A.K_1831275_11_10615343 | 11 | 10615343 | 2.43E-05 | 0.13211 | 299 | 0.137120895 | 0.021202411 |
| SNP_A.K_1004026_6_6820085   | 6  | 6820085  | 2.43E-05 | 0.3495  | 299 | 0.137108784 | 0.021226543 |
| SNP_A.K_978795_6_1782192    | 6  | 1782192  | 2.43E-05 | 0.2893  | 299 | 0.137108408 | 0.021226543 |
| SNP_A.K_307107_2_7379755    | 2  | 7379755  | 2.44E-05 | 0.31104 | 299 | 0.137098198 | 0.021251964 |
| SNP_A.K_201151_1_32138464   | 1  | 32138464 | 2.44E-05 | 0.41304 | 299 | 0.137094004 | 0.021252365 |
| SNP_A.K_1000984_6_6433493   | 6  | 6433493  | 2.44E-05 | 0.34114 | 299 | 0.137092785 | 0.021252365 |
| SNP_A.K_1004962_6_6958745   | 6  | 6958745  | 2.44E-05 | 0.301   | 299 | 0.137081255 | 0.021282275 |
| SNP_A.K_1608584_9_20790624  | 9  | 20790624 | 2.45E-05 | 0.25251 | 299 | 0.137066965 | 0.021321541 |
| SNP_A.K_1600927_9_18862219  | 9  | 18862219 | 2.45E-05 | 0.14716 | 299 | 0.137063809 | 0.021323272 |
| SNP_A.K_977983_6_1629391    | 6  | 1629391  | 2.48E-05 | 0.34783 | 299 | 0.136997516 | 0.021533465 |
| SNP_A.K_977920_6_1621853    | 6  | 1621853  | 2.48E-05 | 0.1806  | 299 | 0.136995925 | 0.021533465 |
| SNP_A.K_1295469_7_23350404  | 7  | 23350404 | 2.48E-05 | 0.02174 | 299 | 0.1369922   | 0.021533465 |
| SNP_A.K_2078813_12_27025327 | 12 | 27025327 | 2.48E-05 | 0.01338 | 299 | 0.136991284 | 0.021533465 |



|                             |    |          |          |         |     |             |             |
|-----------------------------|----|----------|----------|---------|-----|-------------|-------------|
| SNP_A.K_1002100_6_6540944   | 6  | 6540944  | 2.48E-05 | 0.31605 | 299 | 0.136977164 | 0.021572647 |
| SNP_A.K_708869_4_8120145    | 4  | 8120145  | 2.49E-05 | 0.08361 | 299 | 0.13695015  | 0.021656069 |
| SNP_A.K_709864_4_8299780    | 4  | 8299780  | 2.50E-05 | 0.07191 | 299 | 0.136946371 | 0.021659993 |
| SNP_A.K_673451_4_362839     | 4  | 362839   | 2.50E-05 | 0.13378 | 299 | 0.136943494 | 0.021660828 |
| SNP_A.K_1600872_9_18856877  | 9  | 18856877 | 2.51E-05 | 0.13712 | 299 | 0.136921581 | 0.021727053 |
| SNP_A.K_1600800_9_18841897  | 9  | 18841897 | 2.51E-05 | 0.13378 | 299 | 0.13691348  | 0.021736572 |
| SNP_A.K_992674_6_5671450    | 6  | 5671450  | 2.51E-05 | 0.1806  | 299 | 0.136913086 | 0.021736572 |
| SNP_A.K_1371565_8_7853041   | 8  | 7853041  | 2.51E-05 | 0.01839 | 299 | 0.136908845 | 0.021736572 |
| SNP_A.K_978025_6_1640482    | 6  | 1640482  | 2.51E-05 | 0.26254 | 299 | 0.136907847 | 0.021736572 |
| SNP_A.K_992464_6_5651782    | 6  | 5651782  | 2.51E-05 | 0.20234 | 299 | 0.13690567  | 0.021736572 |
| SNP_A.K_1371571_8_7854031   | 8  | 7854031  | 2.51E-05 | 0.02508 | 299 | 0.13690102  | 0.02174354  |
| SNP_A.K_709677_4_8280706    | 4  | 8280706  | 2.52E-05 | 0.09866 | 299 | 0.136881121 | 0.021803097 |
| SNP_A.K_996297_6_5981792    | 6  | 5981792  | 2.53E-05 | 0.2709  | 299 | 0.136865485 | 0.02184071  |
| SNP_A.K_307459_2_7408671    | 2  | 7408671  | 2.53E-05 | 0.25585 | 299 | 0.13686499  | 0.02184071  |
| SNP_A.K_709755_4_8284891    | 4  | 8284891  | 2.53E-05 | 0.08696 | 299 | 0.136858322 | 0.02185471  |
| SNP_A.K_1001331_6_6466073   | 6  | 6466073  | 2.53E-05 | 0.29097 | 299 | 0.136855459 | 0.021855551 |
| SNP_A.K_708363_4_8040750    | 4  | 8040750  | 2.53E-05 | 0.08696 | 299 | 0.13684883  | 0.021869434 |
| SNP_A.K_996203_6_5974871    | 6  | 5974871  | 2.54E-05 | 0.31271 | 299 | 0.136825269 | 0.021942085 |
| SNP_A.K_709503_4_8270885    | 4  | 8270885  | 2.55E-05 | 0.12207 | 299 | 0.136813366 | 0.021974377 |
| SNP_A.K_1001705_6_6507492   | 6  | 6507492  | 2.55E-05 | 0.29097 | 299 | 0.136798735 | 0.022016228 |
| SNP_A.K_1001082_6_6439998   | 6  | 6439998  | 2.56E-05 | 0.38294 | 299 | 0.136782931 | 0.022062267 |
| SNP_A.K_978184_6_1658453    | 6  | 1658453  | 2.56E-05 | 0.1689  | 299 | 0.136772817 | 0.022088488 |
| SNP_A.K_978663_6_1751722    | 6  | 1751722  | 2.57E-05 | 0.29264 | 299 | 0.136757313 | 0.022133637 |
| SNP_A.K_990274_6_4704175    | 6  | 4704175  | 2.57E-05 | 0.21237 | 299 | 0.136751479 | 0.022144938 |
| SNP_A.K_307228_2_7386440    | 2  | 7386440  | 2.58E-05 | 0.45987 | 299 | 0.136744386 | 0.022160666 |
| SNP_A.K_977900_6_1617418    | 6  | 1617418  | 2.58E-05 | 0.24247 | 299 | 0.136738411 | 0.022169637 |
| SNP_A.K_978312_6_1673229    | 6  | 1673229  | 2.58E-05 | 0.18729 | 299 | 0.136736615 | 0.022169637 |
| SNP_A.K_306877_2_7363185    | 2  | 7363185  | 2.58E-05 | 0.26756 | 299 | 0.136728505 | 0.02218897  |
| SNP_A.K_1383139_8_9131826   | 8  | 9131826  | 2.59E-05 | 0.27759 | 299 | 0.136706668 | 0.022256665 |
| SNP_A.K_1001097_6_6441285   | 6  | 6441285  | 2.59E-05 | 0.31104 | 299 | 0.136703935 | 0.022257117 |
| SNP_A.K_978435_6_1693320    | 6  | 1693320  | 2.60E-05 | 0.26421 | 299 | 0.136684356 | 0.022317046 |
| SNP_A.K_1389976_8_10140629  | 8  | 10140629 | 2.61E-05 | 0.05017 | 299 | 0.136670199 | 0.022357932 |
| SNP_A.K_1001306_6_6463514   | 6  | 6463514  | 2.61E-05 | 0.29933 | 299 | 0.136663169 | 0.022373624 |
| SNP_A.K_708896_4_8122472    | 4  | 8122472  | 2.61E-05 | 0.08696 | 299 | 0.136654773 | 0.022394176 |
| SNP_A.K_726170_4_11925305   | 4  | 11925305 | 2.62E-05 | 0.09699 | 299 | 0.136646823 | 0.022413169 |
| SNP_A.K_77686_1_10887934    | 1  | 10887934 | 2.62E-05 | 0.29599 | 299 | 0.136643649 | 0.022415214 |
| SNP_A.K_2063301_12_23966670 | 12 | 23966670 | 2.62E-05 | 0.02676 | 299 | 0.136634136 | 0.02243979  |
| SNP_A.K_1001520_6_6486754   | 6  | 6486754  | 2.63E-05 | 0.29431 | 299 | 0.13662272  | 0.022471166 |
| SNP_A.K_998067_6_6168370    | 6  | 6168370  | 2.63E-05 | 0.16054 | 299 | 0.136613806 | 0.022493675 |
| SNP_A.K_1432395_8_16491078  | 8  | 16491078 | 2.64E-05 | 0.07692 | 299 | 0.136601498 | 0.022505403 |
| SNP_A.K_1432342_8_16485849  | 8  | 16485849 | 2.64E-05 | 0.06522 | 299 | 0.136601316 | 0.022505403 |
| SNP_A.K_1001300_6_6463217   | 6  | 6463217  | 2.64E-05 | 0.29766 | 299 | 0.13660048  | 0.022505403 |
| SNP_A.K_1000994_6_6434753   | 6  | 6434753  | 2.64E-05 | 0.34281 | 299 | 0.136600151 | 0.022505403 |
| SNP_A.K_326938_2_10071519   | 2  | 10071519 | 2.64E-05 | 0.06522 | 299 | 0.136587224 | 0.022542292 |
| SNP_A.K_978674_6_1755963    | 6  | 1755963  | 2.65E-05 | 0.28261 | 299 | 0.136578045 | 0.022565844 |
| SNP_A.K_990311_6_4710030    | 6  | 4710030  | 2.65E-05 | 0.44147 | 299 | 0.136572618 | 0.022576001 |
| SNP_A.K_1390369_8_10193189  | 8  | 10193189 | 2.66E-05 | 0.05518 | 299 | 0.136548118 | 0.022651371 |
| SNP_A.K_990265_6_4703786    | 6  | 4703786  | 2.66E-05 | 0.17726 | 299 | 0.136546412 | 0.022651371 |
| SNP_A.K_218589_1_35319613   | 1  | 35319613 | 2.66E-05 | 0.19231 | 299 | 0.136541049 | 0.022661349 |
| SNP_A.K_325359_2_9874961    | 2  | 9874961  | 2.67E-05 | 0.02508 | 299 | 0.136529795 | 0.02268382  |

|                             |    |          |          |         |     |             |             |
|-----------------------------|----|----------|----------|---------|-----|-------------|-------------|
| SNP_A.K_990410_6_4716244    | 6  | 4716244  | 2.67E-05 | 0.1505  | 299 | 0.136527919 | 0.02268382  |
| SNP_A.K_307410_2_7401717    | 2  | 7401717  | 2.67E-05 | 0.25251 | 299 | 0.136527051 | 0.02268382  |
| SNP_A.K_254769_1_41088166   | 1  | 41088166 | 2.67E-05 | 0.1505  | 299 | 0.136522043 | 0.022692553 |
| SNP_A.K_1608738_9_20829099  | 9  | 20829099 | 2.67E-05 | 0.3913  | 299 | 0.136512106 | 0.022709896 |
| SNP_A.K_1004282_6_6862485   | 6  | 6862485  | 2.67E-05 | 0.34114 | 299 | 0.136512067 | 0.022709896 |
| SNP_A.K_998062_6_6168082    | 6  | 6168082  | 2.68E-05 | 0.18562 | 299 | 0.136502183 | 0.022736208 |
| SNP_A.K_1001991_6_6534115   | 6  | 6534115  | 2.68E-05 | 0.33612 | 299 | 0.136497229 | 0.022744783 |
| SNP_A.K_312201_2_7922869    | 2  | 7922869  | 2.68E-05 | 0.27759 | 299 | 0.136491656 | 0.022755599 |
| SNP_A.K_709752_4_8284859    | 4  | 8284859  | 2.69E-05 | 0.08696 | 299 | 0.136477763 | 0.022796454 |
| SNP_A.K_1608574_9_20787870  | 9  | 20787870 | 2.70E-05 | 0.24916 | 299 | 0.136451083 | 0.022883709 |
| SNP_A.K_1001695_6_6504275   | 6  | 6504275  | 2.70E-05 | 0.29264 | 299 | 0.136443502 | 0.022901889 |
| SNP_A.K_978705_6_1769155    | 6  | 1769155  | 2.71E-05 | 0.36455 | 299 | 0.136432706 | 0.022931764 |
| SNP_A.K_996276_6_5981139    | 6  | 5981139  | 2.71E-05 | 0.27425 | 299 | 0.136420812 | 0.022964827 |
| SNP_A.K_1001309_6_6463852   | 6  | 6463852  | 2.71E-05 | 0.301   | 299 | 0.13641848  | 0.022964827 |
| SNP_A.K_312097_2_7907094    | 2  | 7907094  | 2.72E-05 | 0.26756 | 299 | 0.136410587 | 0.022984224 |
| SNP_A.K_709971_4_8303867    | 4  | 8303867  | 2.72E-05 | 0.07191 | 299 | 0.136405374 | 0.022993871 |
| SNP_A.K_196596_1_31435797   | 1  | 31435797 | 2.72E-05 | 0.47826 | 299 | 0.136397584 | 0.022999825 |
| SNP_A.K_710384_4_8339426    | 4  | 8339426  | 2.72E-05 | 0.08528 | 299 | 0.136396278 | 0.022999825 |
| SNP_A.K_1001760_6_6515087   | 6  | 6515087  | 2.72E-05 | 0.31271 | 299 | 0.136396053 | 0.022999825 |
| SNP_A.K_306997_2_7372458    | 2  | 7372458  | 2.73E-05 | 0.25585 | 299 | 0.136386361 | 0.023025834 |
| SNP_A.K_992030_6_5613461    | 6  | 5613461  | 2.73E-05 | 0.20569 | 299 | 0.136379696 | 0.023038469 |
| SNP_A.K_709817_4_8298364    | 4  | 8298364  | 2.73E-05 | 0.07191 | 299 | 0.136375225 | 0.023038469 |
| SNP_A.K_709816_4_8298357    | 4  | 8298357  | 2.73E-05 | 0.07191 | 299 | 0.136375225 | 0.023038469 |
| SNP_A.K_1001355_6_6466652   | 6  | 6466652  | 2.73E-05 | 0.29599 | 299 | 0.136367789 | 0.023056296 |
| SNP_A.K_456442_2_33037031   | 2  | 33037031 | 2.74E-05 | 0.07358 | 299 | 0.136360167 | 0.023069456 |
| SNP_A.K_326712_2_10041616   | 2  | 10041616 | 2.74E-05 | 0.06689 | 299 | 0.136357362 | 0.023069456 |
| SNP_A.K_1001685_6_6503725   | 6  | 6503725  | 2.74E-05 | 0.29264 | 299 | 0.136355139 | 0.023069456 |
| SNP_A.K_990376_6_4712704    | 6  | 4712704  | 2.74E-05 | 0.19565 | 299 | 0.136353974 | 0.023069456 |
| SNP_A.K_2078834_12_27026248 | 12 | 27026248 | 2.74E-05 | 0.01505 | 299 | 0.136351059 | 0.023070789 |
| SNP_A.K_307017_2_7373145    | 2  | 7373145  | 2.76E-05 | 0.23913 | 299 | 0.136320895 | 0.023168671 |
| SNP_A.K_1001257_6_6459463   | 6  | 6459463  | 2.76E-05 | 0.28428 | 299 | 0.136319249 | 0.023168671 |
| SNP_A.K_710493_4_8424912    | 4  | 8424912  | 2.76E-05 | 0.07191 | 299 | 0.136310152 | 0.023181543 |
| SNP_A.K_978878_6_1793998    | 6  | 1793998  | 2.76E-05 | 0.31271 | 299 | 0.136309827 | 0.023181543 |
| SNP_A.K_995531_6_5940386    | 6  | 5940386  | 2.76E-05 | 0.43813 | 299 | 0.136308105 | 0.023181543 |
| SNP_A.K_978145_6_1653942    | 6  | 1653942  | 2.77E-05 | 0.25753 | 299 | 0.136280852 | 0.023267417 |
| SNP_A.K_978613_6_1742656    | 6  | 1742656  | 2.77E-05 | 0.27926 | 299 | 0.13627969  | 0.023267417 |
| SNP_A.K_1526094_9_5007108   | 9  | 5007108  | 2.78E-05 | 0.01839 | 299 | 0.136271559 | 0.023275043 |
| SNP_A.K_1005042_6_6964425   | 6  | 6964425  | 2.78E-05 | 0.301   | 299 | 0.136271109 | 0.023275043 |
| SNP_A.K_307452_2_7408551    | 2  | 7408551  | 2.78E-05 | 0.2408  | 299 | 0.136269999 | 0.023275043 |
| SNP_A.K_1830608_11_10569818 | 11 | 10569818 | 2.78E-05 | 0.43478 | 299 | 0.136262986 | 0.023291557 |
| SNP_A.K_978289_6_1669545    | 6  | 1669545  | 2.80E-05 | 0.24582 | 299 | 0.136222174 | 0.023433301 |
| SNP_A.K_978836_6_1787195    | 6  | 1787195  | 2.80E-05 | 0.41806 | 299 | 0.136218715 | 0.023436727 |
| SNP_A.K_1830860_11_10585376 | 11 | 10585376 | 2.80E-05 | 0.15719 | 299 | 0.136210482 | 0.023457904 |
| SNP_A.K_999389_6_6286152    | 6  | 6286152  | 2.81E-05 | 0.16221 | 299 | 0.136207245 | 0.023460515 |
| SNP_A.K_1001304_6_6463372   | 6  | 6463372  | 2.81E-05 | 0.30435 | 299 | 0.136192367 | 0.023506472 |
| SNP_A.K_2079159_12_27061427 | 12 | 27061427 | 2.81E-05 | 0.01672 | 299 | 0.136189041 | 0.023509428 |
| SNP_A.K_993662_6_5782161    | 6  | 5782161  | 2.82E-05 | 0.27926 | 299 | 0.136175377 | 0.023550956 |
| SNP_A.K_1001369_6_6470488   | 6  | 6470488  | 2.82E-05 | 0.2893  | 299 | 0.136169382 | 0.023563896 |
| SNP_A.K_325804_2_9944617    | 2  | 9944617  | 2.82E-05 | 0.06689 | 299 | 0.136166573 | 0.023564942 |
| SNP_A.K_990367_6_4712578    | 6  | 4712578  | 2.83E-05 | 0.19565 | 299 | 0.136161871 | 0.023573063 |

|                            |   |          |          |         |     |             |             |
|----------------------------|---|----------|----------|---------|-----|-------------|-------------|
| SNP_A.K_1608490_9_20763555 | 9 | 20763555 | 2.83E-05 | 0.30769 | 299 | 0.136156387 | 0.023584114 |
| SNP_A.K_1608307_9_20667615 | 9 | 20667615 | 2.83E-05 | 0.14214 | 299 | 0.136152014 | 0.023589404 |
| SNP_A.K_308496_2_7521137   | 2 | 7521137  | 2.83E-05 | 0.24582 | 299 | 0.136149921 | 0.023589404 |
| SNP_A.K_709585_4_8274829   | 4 | 8274829  | 2.85E-05 | 0.08361 | 299 | 0.136114819 | 0.023711565 |
| SNP_A.K_1001116_6_6447008  | 6 | 6447008  | 2.85E-05 | 0.38629 | 299 | 0.136104418 | 0.023736254 |
| SNP_A.K_678575_4_990318    | 4 | 990318   | 2.85E-05 | 0.07358 | 299 | 0.136103211 | 0.023736254 |
| SNP_A.K_725739_4_11838620  | 4 | 11838620 | 2.85E-05 | 0.10368 | 299 | 0.136099535 | 0.0237406   |
| SNP_A.K_306790_2_7350886   | 2 | 7350886  | 2.86E-05 | 0.26087 | 299 | 0.136095186 | 0.02374376  |
| SNP_A.K_999886_6_6331605   | 6 | 6331605  | 2.86E-05 | 0.3913  | 299 | 0.136093656 | 0.02374376  |
| SNP_A.K_709830_4_8299133   | 4 | 8299133  | 2.86E-05 | 0.07358 | 299 | 0.136083267 | 0.023765492 |
| SNP_A.K_725661_4_11829199  | 4 | 11829199 | 2.86E-05 | 0.09699 | 299 | 0.136082852 | 0.023765492 |
| SNP_A.K_1608650_9_20810420 | 9 | 20810420 | 2.86E-05 | 0.30936 | 299 | 0.136075263 | 0.023784616 |
| SNP_A.K_710339_4_8336880   | 4 | 8336880  | 2.87E-05 | 0.07358 | 299 | 0.136072214 | 0.023786628 |
| SNP_A.K_1371599_8_7858082  | 8 | 7858082  | 2.87E-05 | 0.01839 | 299 | 0.136061928 | 0.023815965 |
| SNP_A.K_1004047_6_6821588  | 6 | 6821588  | 2.87E-05 | 0.33278 | 299 | 0.136058072 | 0.023820831 |
| SNP_A.K_1004351_6_6874789  | 6 | 6874789  | 2.87E-05 | 0.38629 | 299 | 0.136055615 | 0.023820831 |
| SNP_A.K_1001342_6_6466271  | 6 | 6466271  | 2.88E-05 | 0.29933 | 299 | 0.136047693 | 0.023841279 |
| SNP_A.K_1600694_9_18822060 | 9 | 18822060 | 2.88E-05 | 0.14214 | 299 | 0.136039605 | 0.023861704 |
| SNP_A.K_307052_2_7376096   | 2 | 7376096  | 2.88E-05 | 0.22742 | 299 | 0.136037274 | 0.023861704 |
| SNP_A.K_191198_1_30224468  | 1 | 30224468 | 2.89E-05 | 0.07023 | 299 | 0.136023781 | 0.02390331  |
| SNP_A.K_253109_1_40858909  | 1 | 40858909 | 2.89E-05 | 0.15886 | 299 | 0.136016202 | 0.023922544 |
| SNP_A.K_990234_6_4701775   | 6 | 4701775  | 2.90E-05 | 0.19565 | 299 | 0.136000112 | 0.023964512 |
| SNP_A.K_992530_6_5655041   | 6 | 5655041  | 2.90E-05 | 0.21405 | 299 | 0.136000021 | 0.023964512 |
| SNP_A.K_1123686_6_23551707 | 6 | 23551707 | 2.90E-05 | 0.01338 | 299 | 0.135997636 | 0.023964512 |
| SNP_A.K_673421_4_359064    | 4 | 359064   | 2.90E-05 | 0.1505  | 299 | 0.135993846 | 0.023969403 |
| SNP_A.K_710489_4_8424747   | 4 | 8424747  | 2.91E-05 | 0.07191 | 299 | 0.135978879 | 0.024016836 |
| SNP_A.K_307441_2_7407663   | 2 | 7407663  | 2.92E-05 | 0.301   | 299 | 0.135961861 | 0.024072202 |
| SNP_A.K_990382_6_4712830   | 6 | 4712830  | 2.92E-05 | 0.19398 | 299 | 0.135951707 | 0.024101442 |
| SNP_A.K_978944_6_1816748   | 6 | 1816748  | 2.92E-05 | 0.3194  | 299 | 0.135947596 | 0.024106506 |
| SNP_A.K_1600921_9_18862120 | 9 | 18862120 | 2.92E-05 | 0.15552 | 299 | 0.135945387 | 0.024106506 |
| SNP_A.K_995309_6_5925001   | 6 | 5925001  | 2.93E-05 | 0.14381 | 299 | 0.135938106 | 0.024120661 |
| SNP_A.K_1004522_6_6896526  | 6 | 6896526  | 2.93E-05 | 0.40803 | 299 | 0.135936694 | 0.024120661 |
| SNP_A.K_1001314_6_6464707  | 6 | 6464707  | 2.94E-05 | 0.28261 | 299 | 0.135919739 | 0.024176046 |
| SNP_A.K_1000980_6_6432165  | 6 | 6432165  | 2.94E-05 | 0.34281 | 299 | 0.135910775 | 0.024200874 |
| SNP_A.K_307988_2_7461440   | 2 | 7461440  | 2.94E-05 | 0.47659 | 299 | 0.135904919 | 0.024208718 |
| SNP_A.K_1001512_6_6485964  | 6 | 6485964  | 2.94E-05 | 0.29097 | 299 | 0.135903748 | 0.024208718 |
| SNP_A.K_990349_6_4711884   | 6 | 4711884  | 2.95E-05 | 0.199   | 299 | 0.135896728 | 0.024226118 |
| SNP_A.K_726190_4_11927244  | 4 | 11927244 | 2.96E-05 | 0.09699 | 299 | 0.135878723 | 0.024285816 |
| SNP_A.K_978600_6_1738285   | 6 | 1738285  | 2.96E-05 | 0.24582 | 299 | 0.135872185 | 0.024301421 |
| SNP_A.K_978597_6_1737366   | 6 | 1737366  | 2.96E-05 | 0.24916 | 299 | 0.135864932 | 0.0243198   |
| SNP_A.K_1196448_7_7613481  | 7 | 7613481  | 2.97E-05 | 0.01003 | 299 | 0.135853202 | 0.024347668 |
| SNP_A.K_978754_6_1775148   | 6 | 1775148  | 2.97E-05 | 0.36455 | 299 | 0.135852741 | 0.024347668 |
| SNP_A.K_308483_2_7520041   | 2 | 7520041  | 2.97E-05 | 0.23913 | 299 | 0.135846043 | 0.02436395  |
| SNP_A.K_1000993_6_6434624  | 6 | 6434624  | 2.98E-05 | 0.34615 | 299 | 0.135819461 | 0.024450678 |
| SNP_A.K_725228_4_11763666  | 4 | 11763666 | 2.98E-05 | 0.09866 | 299 | 0.135818678 | 0.024450678 |
| SNP_A.K_709123_4_8230845   | 4 | 8230845  | 2.99E-05 | 0.08528 | 299 | 0.135808741 | 0.024465186 |
| SNP_A.K_1001805_6_6522044  | 6 | 6522044  | 2.99E-05 | 0.29264 | 299 | 0.135807678 | 0.024465186 |
| SNP_A.K_1001234_6_6456767  | 6 | 6456767  | 2.99E-05 | 0.38963 | 299 | 0.135807499 | 0.024465186 |
| SNP_A.K_710363_4_8338696   | 4 | 8338696  | 2.99E-05 | 0.09197 | 299 | 0.135798891 | 0.024488991 |
| SNP_A.K_1004409_6_6880031  | 6 | 6880031  | 3.00E-05 | 0.43144 | 299 | 0.135785705 | 0.024530632 |

|                             |    |          |          |         |     |             |             |
|-----------------------------|----|----------|----------|---------|-----|-------------|-------------|
| SNP_A.K_1001809_6_6522189   | 6  | 6522189  | 3.00E-05 | 0.32274 | 299 | 0.135782808 | 0.02453227  |
| SNP_A.K_978686_6_1761272    | 6  | 1761272  | 3.00E-05 | 0.38629 | 299 | 0.13577535  | 0.024551672 |
| SNP_A.K_201239_1_32154607   | 1  | 32154607 | 3.01E-05 | 0.42308 | 299 | 0.135762809 | 0.024590914 |
| SNP_A.K_195003_1_31033495   | 1  | 31033495 | 3.01E-05 | 0.41304 | 299 | 0.135757329 | 0.02460265  |
| SNP_A.K_901127_5_16261519   | 5  | 16261519 | 3.01E-05 | 0.04348 | 299 | 0.1357528   | 0.024610682 |
| SNP_A.K_709840_4_8299280    | 4  | 8299280  | 3.02E-05 | 0.07525 | 299 | 0.135740847 | 0.024647735 |
| SNP_A.K_710409_4_8348757    | 4  | 8348757  | 3.02E-05 | 0.12709 | 299 | 0.135735789 | 0.024657858 |
| SNP_A.K_1001514_6_6486150   | 6  | 6486150  | 3.02E-05 | 0.29766 | 299 | 0.135732586 | 0.02466073  |
| SNP_A.K_963849_5_28325523   | 5  | 28325523 | 3.03E-05 | 0.03177 | 299 | 0.135729498 | 0.024663153 |
| SNP_A.K_312078_2_7904374    | 2  | 7904374  | 3.03E-05 | 0.2709  | 299 | 0.135720923 | 0.02468707  |
| SNP_A.K_1001470_6_6482800   | 6  | 6482800  | 3.03E-05 | 0.29766 | 299 | 0.135715281 | 0.024699511 |
| SNP_A.K_708510_4_8059196    | 4  | 8059196  | 3.04E-05 | 0.10201 | 299 | 0.135707202 | 0.024721522 |
| SNP_A.K_990273_6_4704167    | 6  | 4704167  | 3.04E-05 | 0.21237 | 299 | 0.135697622 | 0.024746885 |
| SNP_A.K_307252_2_7388042    | 2  | 7388042  | 3.04E-05 | 0.25753 | 299 | 0.135695813 | 0.024746885 |
| SNP_A.K_1000947_6_6425850   | 6  | 6425850  | 3.04E-05 | 0.29766 | 299 | 0.135692992 | 0.024748294 |
| SNP_A.K_709884_4_8300266    | 4  | 8300266  | 3.05E-05 | 0.07358 | 299 | 0.135687647 | 0.024759618 |
| SNP_A.K_996325_6_5986021    | 6  | 5986021  | 3.06E-05 | 0.27759 | 299 | 0.135661474 | 0.024852965 |
| SNP_A.K_1431609_8_16396015  | 8  | 16396015 | 3.07E-05 | 0.07692 | 299 | 0.135646897 | 0.024900802 |
| SNP_A.K_1004378_6_6877859   | 6  | 6877859  | 3.07E-05 | 0.37458 | 299 | 0.135640557 | 0.024916148 |
| SNP_A.K_1830634_11_10571660 | 11 | 10571660 | 3.07E-05 | 0.1689  | 299 | 0.135636631 | 0.024921953 |
| SNP_A.K_1004430_6_6881755   | 6  | 6881755  | 3.07E-05 | 0.31773 | 299 | 0.135632821 | 0.024927312 |
| SNP_A.K_1500264_9_693467    | 9  | 693467   | 3.08E-05 | 0.04515 | 299 | 0.135622891 | 0.024956896 |
| SNP_A.K_996596_6_6011384    | 6  | 6011384  | 3.08E-05 | 0.47659 | 299 | 0.135619864 | 0.024959164 |
| SNP_A.K_978024_6_1640478    | 6  | 1640478  | 3.09E-05 | 0.26087 | 299 | 0.135601716 | 0.025021412 |
| SNP_A.K_306765_2_7348681    | 2  | 7348681  | 3.09E-05 | 0.2709  | 299 | 0.135596071 | 0.025033533 |
| SNP_A.K_709849_4_8299546    | 4  | 8299546  | 3.09E-05 | 0.07358 | 299 | 0.135591319 | 0.025033533 |
| SNP_A.K_752442_4_17906421   | 4  | 17906421 | 3.09E-05 | 0.06355 | 299 | 0.135591311 | 0.025033533 |
| SNP_A.K_990233_6_4701766    | 6  | 4701766  | 3.11E-05 | 0.19732 | 299 | 0.135565737 | 0.025125579 |
| SNP_A.K_1005354_6_7008884   | 6  | 7008884  | 3.12E-05 | 0.34783 | 299 | 0.135545876 | 0.025188754 |
| SNP_A.K_709819_4_8298430    | 4  | 8298430  | 3.12E-05 | 0.07358 | 299 | 0.13554502  | 0.025188754 |
| SNP_A.K_1432909_8_16600919  | 8  | 16600919 | 3.12E-05 | 0.1388  | 299 | 0.13553416  | 0.025222417 |
| SNP_A.K_710127_4_8317606    | 4  | 8317606  | 3.12E-05 | 0.07191 | 299 | 0.135527987 | 0.025234912 |
| SNP_A.K_307053_2_7376127    | 2  | 7376127  | 3.13E-05 | 0.2408  | 299 | 0.13552615  | 0.025234912 |
| SNP_A.K_709783_4_8297645    | 4  | 8297645  | 3.13E-05 | 0.07191 | 299 | 0.135520031 | 0.02524649  |
| SNP_A.K_978598_6_1737830    | 6  | 1737830  | 3.13E-05 | 0.24415 | 299 | 0.135518375 | 0.02524649  |
| SNP_A.K_1830625_11_10571305 | 11 | 10571305 | 3.13E-05 | 0.36455 | 299 | 0.135507395 | 0.025280729 |
| SNP_A.K_312488_2_7965690    | 2  | 7965690  | 3.14E-05 | 0.18729 | 299 | 0.13550033  | 0.025299295 |
| SNP_A.K_1001325_6_6465280   | 6  | 6465280  | 3.14E-05 | 0.301   | 299 | 0.135495772 | 0.025307803 |
| SNP_A.K_997999_6_6165543    | 6  | 6165543  | 3.15E-05 | 0.39632 | 299 | 0.135479544 | 0.025363263 |
| SNP_A.K_1001166_6_6450433   | 6  | 6450433  | 3.15E-05 | 0.28261 | 299 | 0.135467512 | 0.025401922 |
| SNP_A.K_978841_6_1787283    | 6  | 1787283  | 3.16E-05 | 0.35786 | 299 | 0.135464023 | 0.025406167 |
| SNP_A.K_1600813_9_18843542  | 9  | 18843542 | 3.16E-05 | 0.13211 | 299 | 0.135456627 | 0.025426184 |
| SNP_A.K_990272_6_4704113    | 6  | 4704113  | 3.16E-05 | 0.22241 | 299 | 0.135449913 | 0.025443464 |
| SNP_A.K_307345_2_7398163    | 2  | 7398163  | 3.17E-05 | 0.42475 | 299 | 0.135444013 | 0.025457467 |
| SNP_A.K_978162_6_1656541    | 6  | 1656541  | 3.17E-05 | 0.26087 | 299 | 0.135438021 | 0.025466775 |
| SNP_A.K_1000747_6_6414441   | 6  | 6414441  | 3.17E-05 | 0.39298 | 299 | 0.135435817 | 0.025466775 |
| SNP_A.K_1002094_6_6540688   | 6  | 6540688  | 3.17E-05 | 0.31271 | 299 | 0.135434416 | 0.025466775 |
| SNP_A.K_307439_2_7407407    | 2  | 7407407  | 3.18E-05 | 0.23913 | 299 | 0.135422591 | 0.025494862 |
| SNP_A.K_1383174_8_9133384   | 8  | 9133384  | 3.18E-05 | 0.11037 | 299 | 0.135421765 | 0.025494862 |
| SNP_A.K_978763_6_1776123    | 6  | 1776123  | 3.18E-05 | 0.37793 | 299 | 0.135420186 | 0.025494862 |

|                             |    |          |          |         |     |             |             |
|-----------------------------|----|----------|----------|---------|-----|-------------|-------------|
| SNP_A.K_978018_6_1637636    | 6  | 1637636  | 3.18E-05 | 0.16221 | 299 | 0.135415406 | 0.02550439  |
| SNP_A.K_1925645_11_24752398 | 11 | 24752398 | 3.18E-05 | 0.04348 | 299 | 0.135409606 | 0.025518054 |
| SNP_A.K_978606_6_1740472    | 6  | 1740472  | 3.19E-05 | 0.26756 | 299 | 0.135401956 | 0.025539235 |
| SNP_A.K_923563_5_19487977   | 5  | 19487977 | 3.19E-05 | 0.03344 | 299 | 0.135399337 | 0.025540026 |
| SNP_A.K_1004835_6_6935110   | 6  | 6935110  | 3.19E-05 | 0.31773 | 299 | 0.135388356 | 0.025574748 |
| SNP_A.K_1831010_11_10595865 | 11 | 10595865 | 3.20E-05 | 0.14548 | 299 | 0.135383848 | 0.025578743 |
| SNP_A.K_978605_6_1740167    | 6  | 1740167  | 3.20E-05 | 0.25753 | 299 | 0.13538253  | 0.025578743 |
| SNP_A.K_978133_6_1649405    | 6  | 1649405  | 3.20E-05 | 0.29264 | 299 | 0.135370387 | 0.025618257 |
| SNP_A.K_1432938_8_16606416  | 8  | 16606416 | 3.21E-05 | 0.11538 | 299 | 0.135362341 | 0.025629555 |
| SNP_A.K_307350_2_7398349    | 2  | 7398349  | 3.21E-05 | 0.24247 | 299 | 0.13536185  | 0.025629555 |
| SNP_A.K_993998_6_5807106    | 6  | 5807106  | 3.21E-05 | 0.19732 | 299 | 0.135360356 | 0.025629555 |
| SNP_A.K_1608533_9_20772772  | 9  | 20772772 | 3.21E-05 | 0.30769 | 299 | 0.13535718  | 0.025632644 |
| SNP_A.K_1550753_9_9008975   | 9  | 9008975  | 3.21E-05 | 0.11037 | 299 | 0.135351477 | 0.02563729  |
| SNP_A.K_306794_2_7351554    | 2  | 7351554  | 3.21E-05 | 0.26087 | 299 | 0.135351209 | 0.02563729  |
| SNP_A.K_978661_6_1751603    | 6  | 1751603  | 3.23E-05 | 0.28428 | 299 | 0.135318878 | 0.025759367 |
| SNP_A.K_709501_4_8270845    | 4  | 8270845  | 3.23E-05 | 0.10033 | 299 | 0.135315946 | 0.025761493 |
| SNP_A.K_923866_5_19510547   | 5  | 19510547 | 3.24E-05 | 0.02341 | 299 | 0.135304886 | 0.025796896 |
| SNP_A.K_195081_1_31042288   | 1  | 31042288 | 3.25E-05 | 0.4097  | 299 | 0.135288094 | 0.025855877 |
| SNP_A.K_1608556_9_20777207  | 9  | 20777207 | 3.25E-05 | 0.2709  | 299 | 0.135281054 | 0.025874895 |
| SNP_A.K_709943_4_8302612    | 4  | 8302612  | 3.25E-05 | 0.07358 | 299 | 0.135275841 | 0.025886422 |
| SNP_A.K_307023_2_7373310    | 2  | 7373310  | 3.26E-05 | 0.25084 | 299 | 0.135268203 | 0.025907932 |
| SNP_A.K_978046_6_1642528    | 6  | 1642528  | 3.26E-05 | 0.16555 | 299 | 0.135254999 | 0.025952394 |
| SNP_A.K_1000979_6_6431705   | 6  | 6431705  | 3.27E-05 | 0.33946 | 299 | 0.135249106 | 0.025966769 |
| SNP_A.K_1600915_9_18861734  | 9  | 18861734 | 3.27E-05 | 0.12876 | 299 | 0.135243365 | 0.025980532 |
| SNP_A.K_326858_2_10061504   | 2  | 10061504 | 3.29E-05 | 0.06856 | 299 | 0.135210995 | 0.026104471 |
| SNP_A.K_1004897_6_6949731   | 6  | 6949731  | 3.29E-05 | 0.15385 | 299 | 0.135206502 | 0.026113138 |
| SNP_A.K_709814_4_8298320    | 4  | 8298320  | 3.30E-05 | 0.07358 | 299 | 0.135192863 | 0.026159784 |
| SNP_A.K_978889_6_1796800    | 6  | 1796800  | 3.30E-05 | 0.33612 | 299 | 0.135190327 | 0.026160346 |
| SNP_A.K_709372_4_8259282    | 4  | 8259282  | 3.30E-05 | 0.0786  | 299 | 0.135182471 | 0.026183025 |
| SNP_A.K_306717_2_7344672    | 2  | 7344672  | 3.30E-05 | 0.301   | 299 | 0.135178883 | 0.02618797  |
| SNP_A.K_673423_4_360463     | 4  | 360463   | 3.30E-05 | 0.13211 | 299 | 0.135175725 | 0.026191134 |
| SNP_A.K_218762_1_35347467   | 1  | 35347467 | 3.31E-05 | 0.16722 | 299 | 0.135166942 | 0.026211585 |
| SNP_A.K_307425_2_7403811    | 2  | 7403811  | 3.31E-05 | 0.24916 | 299 | 0.135166017 | 0.026211585 |
| SNP_A.K_1582285_9_15055495  | 9  | 15055495 | 3.32E-05 | 0.07358 | 299 | 0.135149812 | 0.026269143 |
| SNP_A.K_978466_6_1696748    | 6  | 1696748  | 3.32E-05 | 0.32107 | 299 | 0.135142716 | 0.026279262 |
| SNP_A.K_2078873_12_27029165 | 12 | 27029165 | 3.32E-05 | 0.01672 | 299 | 0.1351426   | 0.026279262 |
| SNP_A.K_1389969_8_10139556  | 8  | 10139556 | 3.33E-05 | 0.05184 | 299 | 0.135133473 | 0.02630739  |
| SNP_A.K_994952_6_5907602    | 6  | 5907602  | 3.33E-05 | 0.14716 | 299 | 0.135127689 | 0.026318753 |
| SNP_A.K_978019_6_1637921    | 6  | 1637921  | 3.33E-05 | 0.15886 | 299 | 0.135125972 | 0.026318753 |
| SNP_A.K_1001985_6_6533545   | 6  | 6533545  | 3.34E-05 | 0.32107 | 299 | 0.135109625 | 0.026377169 |
| SNP_A.K_726244_4_11930570   | 4  | 11930570 | 3.35E-05 | 0.09699 | 299 | 0.135091283 | 0.026444099 |
| SNP_A.K_709826_4_8298777    | 4  | 8298777  | 3.35E-05 | 0.07191 | 299 | 0.135080404 | 0.026479795 |
| SNP_A.K_977953_6_1624236    | 6  | 1624236  | 3.36E-05 | 0.25251 | 299 | 0.135076215 | 0.026484103 |
| SNP_A.K_1005353_6_7008881   | 6  | 7008881  | 3.36E-05 | 0.35117 | 299 | 0.135074608 | 0.026484103 |
| SNP_A.K_1001802_6_6521640   | 6  | 6521640  | 3.36E-05 | 0.34615 | 299 | 0.13507005  | 0.026493246 |
| SNP_A.K_1001288_6_6461986   | 6  | 6461986  | 3.36E-05 | 0.28094 | 299 | 0.135067096 | 0.026495645 |
| SNP_A.K_307184_2_7383647    | 2  | 7383647  | 3.38E-05 | 0.42977 | 299 | 0.135037616 | 0.026609951 |
| SNP_A.K_923993_5_19533988   | 5  | 19533988 | 3.38E-05 | 0.0301  | 299 | 0.135027533 | 0.026642267 |
| SNP_A.K_990387_6_4713985    | 6  | 4713985  | 3.38E-05 | 0.19565 | 299 | 0.135024315 | 0.026642267 |
| SNP_A.K_1000672_6_6409420   | 6  | 6409420  | 3.39E-05 | 0.28763 | 299 | 0.135021133 | 0.026642267 |

|                             |    |          |          |         |     |             |             |
|-----------------------------|----|----------|----------|---------|-----|-------------|-------------|
| SNP_A.K_307460_2_7408685    | 2  | 7408685  | 3.39E-05 | 0.28094 | 299 | 0.135020454 | 0.026642267 |
| SNP_A.K_1004136_6_6836413   | 6  | 6836413  | 3.40E-05 | 0.36789 | 299 | 0.134995356 | 0.02673326  |
| SNP_A.K_1002053_6_6538464   | 6  | 6538464  | 3.40E-05 | 0.31773 | 299 | 0.134994238 | 0.02673326  |
| SNP_A.K_990385_6_4713382    | 6  | 4713382  | 3.41E-05 | 0.46154 | 299 | 0.134982995 | 0.026770948 |
| SNP_A.K_710477_4_8424078    | 4  | 8424078  | 3.41E-05 | 0.07692 | 299 | 0.134971136 | 0.026801344 |
| SNP_A.K_990373_6_4712654    | 6  | 4712654  | 3.41E-05 | 0.19565 | 299 | 0.134971103 | 0.026801344 |
| SNP_A.K_86876_1_11849418    | 1  | 11849418 | 3.43E-05 | 0.09532 | 299 | 0.134935842 | 0.026935396 |
| SNP_A.K_1001776_6_6520039   | 6  | 6520039  | 3.43E-05 | 0.29431 | 299 | 0.134934958 | 0.026935396 |
| SNP_A.K_194947_1_31004275   | 1  | 31004275 | 3.44E-05 | 0.41137 | 299 | 0.134924094 | 0.026971769 |
| SNP_A.K_1004836_6_6935117   | 6  | 6935117  | 3.44E-05 | 0.32107 | 299 | 0.134916904 | 0.026992432 |
| SNP_A.K_230050_1_37526891   | 1  | 37526891 | 3.45E-05 | 0.01003 | 299 | 0.134907378 | 0.027023145 |
| SNP_A.K_978906_6_1800232    | 6  | 1800232  | 3.46E-05 | 0.32776 | 299 | 0.134888593 | 0.02709373  |
| SNP_A.K_709866_4_8299906    | 4  | 8299906  | 3.47E-05 | 0.08194 | 299 | 0.134871846 | 0.027150142 |
| SNP_A.K_678979_4_1020675    | 4  | 1020675  | 3.47E-05 | 0.03177 | 299 | 0.13487077  | 0.027150142 |
| SNP_A.K_990284_6_4704748    | 6  | 4704748  | 3.48E-05 | 0.17559 | 299 | 0.134845384 | 0.027222169 |
| SNP_A.K_1001098_6_6441292   | 6  | 6441292  | 3.48E-05 | 0.38796 | 299 | 0.134844879 | 0.027222169 |
| SNP_A.K_1005295_6_7002710   | 6  | 7002710  | 3.48E-05 | 0.32943 | 299 | 0.134843188 | 0.027222169 |
| SNP_A.K_995372_6_5929160    | 6  | 5929160  | 3.48E-05 | 0.36789 | 299 | 0.134841281 | 0.027222169 |
| SNP_A.K_1002155_6_6548233   | 6  | 6548233  | 3.48E-05 | 0.41304 | 299 | 0.134840633 | 0.027222169 |
| SNP_A.K_978049_6_1643938    | 6  | 1643938  | 3.49E-05 | 0.19398 | 299 | 0.134839917 | 0.027222169 |
| SNP_A.K_28875_1_4175841     | 1  | 4175841  | 3.49E-05 | 0.13712 | 299 | 0.134823844 | 0.027281557 |
| SNP_A.K_1830666_11_10573233 | 11 | 10573233 | 3.50E-05 | 0.35619 | 299 | 0.134818356 | 0.02728202  |
| SNP_A.K_307067_2_7377321    | 2  | 7377321  | 3.50E-05 | 0.39799 | 299 | 0.134815893 | 0.02728202  |
| SNP_A.K_129753_1_18609914   | 1  | 18609914 | 3.50E-05 | 0.34281 | 299 | 0.134814708 | 0.02728202  |
| SNP_A.K_1001111_6_6445293   | 6  | 6445293  | 3.50E-05 | 0.38796 | 299 | 0.134810112 | 0.02728202  |
| SNP_A.K_306872_2_7362171    | 2  | 7362171  | 3.50E-05 | 0.24415 | 299 | 0.134808218 | 0.02728202  |
| SNP_A.K_1001567_6_6492126   | 6  | 6492126  | 3.50E-05 | 0.29599 | 299 | 0.134807882 | 0.02728202  |
| SNP_A.K_978449_6_1694640    | 6  | 1694640  | 3.50E-05 | 0.26756 | 299 | 0.134807239 | 0.02728202  |
| SNP_A.K_1831277_11_10615374 | 11 | 10615374 | 3.51E-05 | 0.13378 | 299 | 0.134798734 | 0.027306711 |
| SNP_A.K_1831340_11_10620605 | 11 | 10620605 | 3.51E-05 | 0.13211 | 299 | 0.134793762 | 0.027306711 |
| SNP_A.K_1288082_7_22238441  | 7  | 22238441 | 3.51E-05 | 0.02007 | 299 | 0.134792565 | 0.027306711 |
| SNP_A.K_710476_4_8423994    | 4  | 8423994  | 3.51E-05 | 0.07525 | 299 | 0.134791442 | 0.027306711 |
| SNP_A.K_994771_6_5888257    | 6  | 5888257  | 3.51E-05 | 0.27759 | 299 | 0.134789789 | 0.027306711 |
| SNP_A.K_709823_4_8298539    | 4  | 8298539  | 3.52E-05 | 0.07191 | 299 | 0.134782458 | 0.027328346 |
| SNP_A.K_1000840_6_6420727   | 6  | 6420727  | 3.53E-05 | 0.40134 | 299 | 0.134767986 | 0.027377926 |
| SNP_A.K_1001330_6_6466063   | 6  | 6466063  | 3.53E-05 | 0.29264 | 299 | 0.134766359 | 0.027377926 |
| SNP_A.K_995310_6_5925041    | 6  | 5925041  | 3.53E-05 | 0.14883 | 299 | 0.134755744 | 0.027413934 |
| SNP_A.K_1001517_6_6486511   | 6  | 6486511  | 3.54E-05 | 0.29599 | 299 | 0.134750576 | 0.027426238 |
| SNP_A.K_996048_6_5959414    | 6  | 5959414  | 3.54E-05 | 0.45485 | 299 | 0.134744244 | 0.027443629 |
| SNP_A.K_709888_4_8300350    | 4  | 8300350  | 3.54E-05 | 0.07525 | 299 | 0.134737002 | 0.027465003 |
| SNP_A.K_2078507_12_26993854 | 12 | 26993854 | 3.55E-05 | 0.01672 | 299 | 0.134731326 | 0.027479564 |
| SNP_A.K_1000943_6_6425717   | 6  | 6425717  | 3.55E-05 | 0.301   | 299 | 0.13472561  | 0.027494306 |
| SNP_A.K_996189_6_5973818    | 6  | 5973818  | 3.55E-05 | 0.32943 | 299 | 0.134717749 | 0.027503961 |
| SNP_A.K_201282_1_32159629   | 1  | 32159629 | 3.55E-05 | 0.42475 | 299 | 0.134717038 | 0.027503961 |
| SNP_A.K_709415_4_8265494    | 4  | 8265494  | 3.55E-05 | 0.11204 | 299 | 0.134715514 | 0.027503961 |
| SNP_A.K_1001875_6_6528518   | 6  | 6528518  | 3.56E-05 | 0.3796  | 299 | 0.134714044 | 0.027503961 |
| SNP_A.K_1830660_11_10573074 | 11 | 10573074 | 3.56E-05 | 0.36957 | 299 | 0.134702328 | 0.027544994 |
| SNP_A.K_1600925_9_18862205  | 9  | 18862205 | 3.59E-05 | 0.15886 | 299 | 0.134657316 | 0.027707853 |
| SNP_A.K_1002141_6_6547812   | 6  | 6547812  | 3.59E-05 | 0.41973 | 299 | 0.134657266 | 0.027707853 |
| SNP_A.K_218780_1_35351216   | 1  | 35351216 | 3.59E-05 | 0.16555 | 299 | 0.134653358 | 0.027707853 |

|                            |   |          |          |         |     |             |             |
|----------------------------|---|----------|----------|---------|-----|-------------|-------------|
| SNP_A.K_306972_2_7371274   | 2 | 7371274  | 3.59E-05 | 0.25418 | 299 | 0.134652471 | 0.027707853 |
| SNP_A.K_1002045_6_6537942  | 6 | 6537942  | 3.59E-05 | 0.31773 | 299 | 0.134652398 | 0.027707853 |
| SNP_A.K_307518_2_7414942   | 2 | 7414942  | 3.59E-05 | 0.43645 | 299 | 0.134651243 | 0.027707853 |
| SNP_A.K_995250_6_5921457   | 6 | 5921457  | 3.60E-05 | 0.1806  | 299 | 0.134642437 | 0.027736388 |
| SNP_A.K_1600741_9_18830687 | 9 | 18830687 | 3.60E-05 | 0.23077 | 299 | 0.134640107 | 0.02773639  |
| SNP_A.K_709853_4_8299610   | 4 | 8299610  | 3.60E-05 | 0.07358 | 299 | 0.134635678 | 0.02774565  |
| SNP_A.K_1000461_6_6386487  | 6 | 6386487  | 3.60E-05 | 0.27926 | 299 | 0.134632062 | 0.027751331 |
| SNP_A.K_978198_6_1659942   | 6 | 1659942  | 3.60E-05 | 0.18227 | 299 | 0.134627513 | 0.027758603 |
| SNP_A.K_1001749_6_6514610  | 6 | 6514610  | 3.61E-05 | 0.3194  | 299 | 0.134624158 | 0.027758603 |
| SNP_A.K_710481_4_8424250   | 4 | 8424250  | 3.61E-05 | 0.07358 | 299 | 0.134623435 | 0.027758603 |
| SNP_A.K_306812_2_7354862   | 2 | 7354862  | 3.62E-05 | 0.26589 | 299 | 0.134605655 | 0.027826897 |
| SNP_A.K_28979_1_4192836    | 1 | 4192836  | 3.62E-05 | 0.09365 | 299 | 0.134601827 | 0.027833556 |
| SNP_A.K_1001169_6_6450577  | 6 | 6450577  | 3.63E-05 | 0.28094 | 299 | 0.134586916 | 0.027889321 |
| SNP_A.K_307731_2_7443498   | 2 | 7443498  | 3.63E-05 | 0.45151 | 299 | 0.134579849 | 0.027910369 |
| SNP_A.K_1004211_6_6849785  | 6 | 6849785  | 3.64E-05 | 0.32609 | 299 | 0.134567649 | 0.027954247 |
| SNP_A.K_996108_6_5962408   | 6 | 5962408  | 3.64E-05 | 0.47826 | 299 | 0.134562527 | 0.02796289  |
| SNP_A.K_997627_6_6139934   | 6 | 6139934  | 3.64E-05 | 0.14548 | 299 | 0.134560926 | 0.02796289  |
| SNP_A.K_1004880_6_6942548  | 6 | 6942548  | 3.64E-05 | 0.4097  | 299 | 0.134558746 | 0.02796289  |
| SNP_A.K_374682_2_17871647  | 2 | 17871647 | 3.67E-05 | 0.05351 | 299 | 0.134518298 | 0.028130081 |
| SNP_A.K_709416_4_8265516   | 4 | 8265516  | 3.67E-05 | 0.08863 | 299 | 0.134516624 | 0.028130081 |
| SNP_A.K_996020_6_5958060   | 6 | 5958060  | 3.68E-05 | 0.29599 | 299 | 0.13450236  | 0.028163467 |
| SNP_A.K_709788_4_8297782   | 4 | 8297782  | 3.68E-05 | 0.07191 | 299 | 0.134499449 | 0.028163467 |
| SNP_A.K_995626_6_5943865   | 6 | 5943865  | 3.68E-05 | 0.46488 | 299 | 0.134497736 | 0.028163467 |
| SNP_A.K_307359_2_7398637   | 2 | 7398637  | 3.68E-05 | 0.44649 | 299 | 0.134495729 | 0.028163467 |
| SNP_A.K_709869_4_8299971   | 4 | 8299971  | 3.68E-05 | 0.07525 | 299 | 0.134495284 | 0.028163467 |
| SNP_A.K_709870_4_8299994   | 4 | 8299994  | 3.68E-05 | 0.07525 | 299 | 0.134495284 | 0.028163467 |
| SNP_A.K_1001518_6_6486525  | 6 | 6486525  | 3.69E-05 | 0.29264 | 299 | 0.134485577 | 0.028172043 |
| SNP_A.K_710037_4_8310626   | 4 | 8310626  | 3.69E-05 | 0.07692 | 299 | 0.134482065 | 0.028172043 |
| SNP_A.K_1005581_6_7028127  | 6 | 7028127  | 3.69E-05 | 0.13712 | 299 | 0.134481637 | 0.028172043 |
| SNP_A.K_978432_6_1690843   | 6 | 1690843  | 3.69E-05 | 0.24916 | 299 | 0.134480711 | 0.028172043 |
| SNP_A.K_990366_6_4712521   | 6 | 4712521  | 3.69E-05 | 0.20234 | 299 | 0.134479758 | 0.028172043 |
| SNP_A.K_1001482_6_6483366  | 6 | 6483366  | 3.69E-05 | 0.29264 | 299 | 0.134479519 | 0.028172043 |
| SNP_A.K_198084_1_31695572  | 1 | 31695572 | 3.69E-05 | 0.46154 | 299 | 0.134475331 | 0.028180479 |
| SNP_A.K_995623_6_5943761   | 6 | 5943761  | 3.70E-05 | 0.45652 | 299 | 0.134464015 | 0.028220896 |
| SNP_A.K_1001187_6_6453566  | 6 | 6453566  | 3.72E-05 | 0.27926 | 299 | 0.134429113 | 0.028359205 |
| SNP_A.K_1004989_6_6960170  | 6 | 6960170  | 3.72E-05 | 0.30268 | 299 | 0.134426988 | 0.028359205 |
| SNP_A.K_1500598_9_725474   | 9 | 725474   | 3.72E-05 | 0.03679 | 299 | 0.134425393 | 0.028359205 |
| SNP_A.K_998754_6_6219912   | 6 | 6219912  | 3.72E-05 | 0.26589 | 299 | 0.134424067 | 0.028359205 |
| SNP_A.K_442795_2_28971305  | 2 | 28971305 | 3.73E-05 | 0.03679 | 299 | 0.134420145 | 0.028366518 |
| SNP_A.K_1001344_6_6466344  | 6 | 6466344  | 3.73E-05 | 0.29264 | 299 | 0.134406218 | 0.028418275 |
| SNP_A.K_1001473_6_6483025  | 6 | 6483025  | 3.74E-05 | 0.29264 | 299 | 0.134401789 | 0.028418275 |
| SNP_A.K_1001474_6_6483046  | 6 | 6483046  | 3.74E-05 | 0.29264 | 299 | 0.134401789 | 0.028418275 |
| SNP_A.K_306766_2_7348832   | 2 | 7348832  | 3.75E-05 | 0.25084 | 299 | 0.134374389 | 0.028531975 |
| SNP_A.K_456449_2_33038925  | 2 | 33038925 | 3.76E-05 | 0.13211 | 299 | 0.134368154 | 0.028549863 |
| SNP_A.K_800197_4_28269322  | 4 | 28269322 | 3.77E-05 | 0.15886 | 299 | 0.134347394 | 0.028633845 |
| SNP_A.K_990280_6_4704420   | 6 | 4704420  | 3.78E-05 | 0.43311 | 299 | 0.134335447 | 0.028677848 |
| SNP_A.K_709835_4_8299235   | 4 | 8299235  | 3.79E-05 | 0.07358 | 299 | 0.134310919 | 0.028779461 |
| SNP_A.K_710421_4_8361024   | 4 | 8361024  | 3.80E-05 | 0.17224 | 299 | 0.134294152 | 0.028845814 |
| SNP_A.K_978425_6_1689632   | 6 | 1689632  | 3.80E-05 | 0.27926 | 299 | 0.134289698 | 0.02885574  |
| SNP_A.K_1001508_6_6485463  | 6 | 6485463  | 3.81E-05 | 0.29766 | 299 | 0.134282493 | 0.028871231 |

|                             |    |          |          |         |     |             |             |
|-----------------------------|----|----------|----------|---------|-----|-------------|-------------|
| SNP_A.K_311714_2_7854503    | 2  | 7854503  | 3.81E-05 | 0.20903 | 299 | 0.134281745 | 0.028871231 |
| SNP_A.K_760915_4_19816982   | 4  | 19816982 | 3.82E-05 | 0.01338 | 299 | 0.134271269 | 0.028908862 |
| SNP_A.K_1925314_11_24727277 | 11 | 24727277 | 3.83E-05 | 0.02843 | 299 | 0.134254577 | 0.028975189 |
| SNP_A.K_999127_6_6257882    | 6  | 6257882  | 3.83E-05 | 0.15886 | 299 | 0.134249585 | 0.02898766  |
| SNP_A.K_306957_2_7370659    | 2  | 7370659  | 3.83E-05 | 0.2408  | 299 | 0.134241129 | 0.02901613  |
| SNP_A.K_726191_4_11927318   | 4  | 11927318 | 3.84E-05 | 0.10201 | 299 | 0.134236964 | 0.02902481  |
| SNP_A.K_307309_2_7394056    | 2  | 7394056  | 3.85E-05 | 0.23579 | 299 | 0.134216569 | 0.029102358 |
| SNP_A.K_2080302_12_27255343 | 12 | 27255343 | 3.85E-05 | 0.02508 | 299 | 0.134215627 | 0.029102358 |
| SNP_A.K_996245_6_5976867    | 6  | 5976867  | 3.85E-05 | 0.47659 | 299 | 0.134208149 | 0.029126428 |
| SNP_A.K_307115_2_7380610    | 2  | 7380610  | 3.86E-05 | 0.40134 | 299 | 0.134195886 | 0.029172719 |
| SNP_A.K_992002_6_5607592    | 6  | 5607592  | 3.87E-05 | 0.19398 | 299 | 0.134174491 | 0.029256024 |
| SNP_A.K_977990_6_1631244    | 6  | 1631244  | 3.88E-05 | 0.16555 | 299 | 0.134172762 | 0.029256024 |
| SNP_A.K_1500115_9_680282    | 9  | 680282   | 3.88E-05 | 0.04515 | 299 | 0.134170019 | 0.029256024 |
| SNP_A.K_725704_4_11832175   | 4  | 11832175 | 3.88E-05 | 0.09365 | 299 | 0.134168848 | 0.029256024 |
| SNP_A.K_1001258_6_6459473   | 6  | 6459473  | 3.88E-05 | 0.37793 | 299 | 0.134160634 | 0.029283676 |
| SNP_A.K_923781_5_19501635   | 5  | 19501635 | 3.89E-05 | 0.03344 | 299 | 0.134152439 | 0.029311271 |
| SNP_A.K_1608488_9_20763316  | 9  | 20763316 | 3.89E-05 | 0.28261 | 299 | 0.134143552 | 0.029342125 |
| SNP_A.K_2064710_12_24187992 | 12 | 24187992 | 3.90E-05 | 0.0301  | 299 | 0.134138534 | 0.029354935 |
| SNP_A.K_307942_2_7457763    | 2  | 7457763  | 3.90E-05 | 0.45485 | 299 | 0.134133806 | 0.029366404 |
| SNP_A.K_325288_2_9863611    | 2  | 9863611  | 3.90E-05 | 0.1087  | 299 | 0.13412711  | 0.029387078 |
| SNP_A.K_977885_6_1612551    | 6  | 1612551  | 3.91E-05 | 0.17893 | 299 | 0.134115831 | 0.029429231 |
| SNP_A.K_374879_2_17910705   | 2  | 17910705 | 3.92E-05 | 0.04013 | 299 | 0.134104376 | 0.029469832 |
| SNP_A.K_710118_4_8317277    | 4  | 8317277  | 3.92E-05 | 0.09365 | 299 | 0.134102626 | 0.029469832 |
| SNP_A.K_1830696_11_10574736 | 11 | 10574736 | 3.92E-05 | 0.1388  | 299 | 0.134100144 | 0.029470828 |
| SNP_A.K_1432058_8_16448292  | 8  | 16448292 | 3.92E-05 | 0.0786  | 299 | 0.134096412 | 0.029477692 |
| SNP_A.K_990308_6_4709872    | 6  | 4709872  | 3.94E-05 | 0.20067 | 299 | 0.134066298 | 0.029602655 |
| SNP_A.K_990252_6_4703350    | 6  | 4703350  | 3.94E-05 | 0.4398  | 299 | 0.134064588 | 0.029602655 |
| SNP_A.K_1004912_6_6952238   | 6  | 6952238  | 3.94E-05 | 0.37124 | 299 | 0.134063031 | 0.029602655 |
| SNP_A.K_993957_6_5802362    | 6  | 5802362  | 3.95E-05 | 0.20234 | 299 | 0.134057314 | 0.029618921 |
| SNP_A.K_1004229_6_6851932   | 6  | 6851932  | 3.96E-05 | 0.32441 | 299 | 0.134033287 | 0.029704717 |
| SNP_A.K_710287_4_8334822    | 4  | 8334822  | 3.96E-05 | 0.08027 | 299 | 0.134032586 | 0.029704717 |
| SNP_A.K_978291_6_1669858    | 6  | 1669858  | 3.96E-05 | 0.2592  | 299 | 0.13403235  | 0.029704717 |
| SNP_A.K_1004974_6_6959305   | 6  | 6959305  | 3.96E-05 | 0.31605 | 299 | 0.134030012 | 0.029705076 |
| SNP_A.K_1001526_6_6487294   | 6  | 6487294  | 3.97E-05 | 0.29766 | 299 | 0.134019796 | 0.029742708 |
| SNP_A.K_990277_6_4704301    | 6  | 4704301  | 3.97E-05 | 0.20569 | 299 | 0.134017457 | 0.029743083 |
| SNP_A.K_710398_4_8340344    | 4  | 8340344  | 3.98E-05 | 0.07525 | 299 | 0.13400927  | 0.029771157 |
| SNP_A.K_978809_6_1783411    | 6  | 1783411  | 3.99E-05 | 0.35452 | 299 | 0.133990631 | 0.029848885 |
| SNP_A.K_1001420_6_6481121   | 6  | 6481121  | 3.99E-05 | 0.32274 | 299 | 0.133985901 | 0.029860634 |
| SNP_A.K_978374_6_1683886    | 6  | 1683886  | 4.00E-05 | 0.26756 | 299 | 0.133968465 | 0.029932872 |
| SNP_A.K_1001324_6_6465263   | 6  | 6465263  | 4.01E-05 | 0.30769 | 299 | 0.133959428 | 0.029946099 |
| SNP_A.K_307245_2_7387789    | 2  | 7387789  | 4.01E-05 | 0.23913 | 299 | 0.133958834 | 0.029946099 |
| SNP_A.K_307536_2_7416263    | 2  | 7416263  | 4.01E-05 | 0.2592  | 299 | 0.133957057 | 0.029946099 |
| SNP_A.K_307258_2_7388404    | 2  | 7388404  | 4.01E-05 | 0.44816 | 299 | 0.13395667  | 0.029946099 |
| SNP_A.K_1001500_6_6484753   | 6  | 6484753  | 4.01E-05 | 0.32943 | 299 | 0.1339539   | 0.029948567 |
| SNP_A.K_218548_1_35311188   | 1  | 35311188 | 4.01E-05 | 0.15719 | 299 | 0.133950875 | 0.029952252 |
| SNP_A.K_978845_6_1787322    | 6  | 1787322  | 4.02E-05 | 0.39298 | 299 | 0.133938214 | 0.030001931 |
| SNP_A.K_978472_6_1698496    | 6  | 1698496  | 4.03E-05 | 0.25753 | 299 | 0.133933747 | 0.030008877 |
| SNP_A.K_978388_6_1684979    | 6  | 1684979  | 4.03E-05 | 0.27425 | 299 | 0.13393226  | 0.030008877 |
| SNP_A.K_1001357_6_6466671   | 6  | 6466671  | 4.03E-05 | 0.29599 | 299 | 0.13392362  | 0.030039424 |
| SNP_A.K_1001479_6_6483202   | 6  | 6483202  | 4.04E-05 | 0.29431 | 299 | 0.133918192 | 0.030054636 |



|                            |   |          |          |         |     |             |             |
|----------------------------|---|----------|----------|---------|-----|-------------|-------------|
| SNP_A.K_1000825_6_6418834  | 6 | 6418834  | 4.04E-05 | 0.39465 | 299 | 0.133907165 | 0.030089063 |
| SNP_A.K_1001756_6_6514964  | 6 | 6514964  | 4.04E-05 | 0.29766 | 299 | 0.133905515 | 0.030089063 |
| SNP_A.K_709762_4_8285211   | 4 | 8285211  | 4.04E-05 | 0.09365 | 299 | 0.133904263 | 0.030089063 |
| SNP_A.K_725358_4_11797977  | 4 | 11797977 | 4.05E-05 | 0.10033 | 299 | 0.133900958 | 0.030094143 |
| SNP_A.K_710327_4_8336476   | 4 | 8336476  | 4.05E-05 | 0.07358 | 299 | 0.133894997 | 0.030101387 |
| SNP_A.K_196663_1_31474094  | 1 | 31474094 | 4.05E-05 | 0.30936 | 299 | 0.13389496  | 0.030101387 |
| SNP_A.K_1000864_6_6421527  | 6 | 6421527  | 4.05E-05 | 0.28261 | 299 | 0.133892048 | 0.030104598 |
| SNP_A.K_38247_1_5512773    | 1 | 5512773  | 4.06E-05 | 0.0301  | 299 | 0.133885572 | 0.030124902 |
| SNP_A.K_1000912_6_6423386  | 6 | 6423386  | 4.06E-05 | 0.28595 | 299 | 0.133880973 | 0.030136216 |
| SNP_A.K_1001718_6_6508930  | 6 | 6508930  | 4.06E-05 | 0.30936 | 299 | 0.133876037 | 0.030149155 |
| SNP_A.K_1600842_9_18848742 | 9 | 18848742 | 4.07E-05 | 0.13712 | 299 | 0.133866225 | 0.030185532 |
| SNP_A.K_1001219_6_6455402  | 6 | 6455402  | 4.07E-05 | 0.35953 | 299 | 0.133863023 | 0.030190163 |
| SNP_A.K_1466264_8_21215845 | 8 | 21215845 | 4.07E-05 | 0.04013 | 299 | 0.133859345 | 0.030197088 |
| SNP_A.K_129814_1_18619202  | 1 | 18619202 | 4.08E-05 | 0.21405 | 299 | 0.133846963 | 0.03024591  |
| SNP_A.K_978607_6_1740733   | 6 | 1740733  | 4.08E-05 | 0.26756 | 299 | 0.133843266 | 0.030252951 |
| SNP_A.K_995388_6_5931368   | 6 | 5931368  | 4.09E-05 | 0.47324 | 299 | 0.133835629 | 0.030255259 |
| SNP_A.K_306814_2_7355244   | 2 | 7355244  | 4.09E-05 | 0.301   | 299 | 0.133834318 | 0.030255259 |
| SNP_A.K_978454_6_1694808   | 6 | 1694808  | 4.09E-05 | 0.27425 | 299 | 0.133833198 | 0.030255259 |
| SNP_A.K_673337_4_349572    | 4 | 349572   | 4.09E-05 | 0.08361 | 299 | 0.13383165  | 0.030255259 |
| SNP_A.K_978869_6_1793572   | 6 | 1793572  | 4.09E-05 | 0.3194  | 299 | 0.133831621 | 0.030255259 |
| SNP_A.K_1608492_9_20763701 | 9 | 20763701 | 4.10E-05 | 0.29766 | 299 | 0.133824051 | 0.030280996 |
| SNP_A.K_1390306_8_10178028 | 8 | 10178028 | 4.11E-05 | 0.06689 | 299 | 0.133802127 | 0.030376102 |
| SNP_A.K_1001530_6_6487508  | 6 | 6487508  | 4.12E-05 | 0.29599 | 299 | 0.13379317  | 0.030394816 |
| SNP_A.K_677697_4_904276    | 4 | 904276   | 4.12E-05 | 0.20067 | 299 | 0.133791869 | 0.030394816 |
| SNP_A.K_92744_1_12757601   | 1 | 12757601 | 4.12E-05 | 0.14548 | 299 | 0.133791575 | 0.030394816 |
| SNP_A.K_978251_6_1665566   | 6 | 1665566  | 4.12E-05 | 0.20067 | 299 | 0.133789291 | 0.030395094 |
| SNP_A.K_87017_1_11862775   | 1 | 11862775 | 4.13E-05 | 0.07692 | 299 | 0.133775874 | 0.030446992 |
| SNP_A.K_1534450_9_5986609  | 9 | 5986609  | 4.13E-05 | 0.12542 | 299 | 0.133774127 | 0.030446992 |
| SNP_A.K_1001167_6_6450534  | 6 | 6450534  | 4.13E-05 | 0.29933 | 299 | 0.133766271 | 0.030470335 |
| SNP_A.K_218488_1_35296897  | 1 | 35296897 | 4.14E-05 | 0.1689  | 299 | 0.133764867 | 0.030470335 |
| SNP_A.K_709367_4_8259002   | 4 | 8259002  | 4.14E-05 | 0.08696 | 299 | 0.133752369 | 0.030512502 |
| SNP_A.K_1001754_6_6514921  | 6 | 6514921  | 4.14E-05 | 0.30268 | 299 | 0.133751739 | 0.030512502 |
| SNP_A.K_1608518_9_20771552 | 9 | 20771552 | 4.15E-05 | 0.27258 | 299 | 0.133747809 | 0.030520811 |
| SNP_A.K_1364928_8_6059477  | 8 | 6059477  | 4.15E-05 | 0.12207 | 299 | 0.133745475 | 0.030521362 |
| SNP_A.K_28934_1_4183585    | 1 | 4183585  | 4.15E-05 | 0.08863 | 299 | 0.13373789  | 0.030547455 |
| SNP_A.K_1001561_6_6491839  | 6 | 6491839  | 4.16E-05 | 0.29766 | 299 | 0.133734523 | 0.030553045 |
| SNP_A.K_710499_4_8425039   | 4 | 8425039  | 4.16E-05 | 0.07525 | 299 | 0.133729372 | 0.030567318 |
| SNP_A.K_978148_6_1654369   | 6 | 1654369  | 4.17E-05 | 0.26087 | 299 | 0.13371953  | 0.030604464 |
| SNP_A.K_993233_6_5723185   | 6 | 5723185  | 4.17E-05 | 0.47324 | 299 | 0.133713001 | 0.030625494 |
| SNP_A.K_1000974_6_6430386  | 6 | 6430386  | 4.17E-05 | 0.32943 | 299 | 0.133710755 | 0.030625639 |
| SNP_A.K_752461_4_17906704  | 4 | 17906704 | 4.17E-05 | 0.06522 | 299 | 0.133707976 | 0.030628395 |
| SNP_A.K_996121_6_5963687   | 6 | 5963687  | 4.18E-05 | 0.49331 | 299 | 0.133703394 | 0.030636212 |
| SNP_A.K_908144_5_17480756  | 5 | 17480756 | 4.18E-05 | 0.03344 | 299 | 0.133700425 | 0.030636212 |
| SNP_A.K_1001495_6_6484023  | 6 | 6484023  | 4.18E-05 | 0.30268 | 299 | 0.133698203 | 0.030636212 |
| SNP_A.K_993451_6_5752386   | 6 | 5752386  | 4.18E-05 | 0.13712 | 299 | 0.133694353 | 0.030636212 |
| SNP_A.K_1488082_8_26998369 | 8 | 26998369 | 4.18E-05 | 0.49833 | 299 | 0.133690622 | 0.030636212 |
| SNP_A.K_1183415_7_4548555  | 7 | 4548555  | 4.19E-05 | 0.44482 | 299 | 0.133689815 | 0.030636212 |
| SNP_A.K_456486_2_33045111  | 2 | 33045111 | 4.19E-05 | 0.07191 | 299 | 0.13368887  | 0.030636212 |
| SNP_A.K_709855_4_8299648   | 4 | 8299648  | 4.19E-05 | 0.0786  | 299 | 0.133688687 | 0.030636212 |
| SNP_A.K_978150_6_1654538   | 6 | 1654538  | 4.19E-05 | 0.27759 | 299 | 0.13368615  | 0.030637822 |

|                             |    |          |          |         |     |             |             |
|-----------------------------|----|----------|----------|---------|-----|-------------|-------------|
| SNP_A.K_1830751_11_10577260 | 11 | 10577260 | 4.20E-05 | 0.13211 | 299 | 0.133673732 | 0.03068769  |
| SNP_A.K_1001499_6_6484709   | 6  | 6484709  | 4.20E-05 | 0.30602 | 299 | 0.133671525 | 0.030687696 |
| SNP_A.K_1004347_6_6870573   | 6  | 6870573  | 4.20E-05 | 0.37793 | 299 | 0.133661456 | 0.030726158 |
| SNP_A.K_306894_2_7364239    | 2  | 7364239  | 4.21E-05 | 0.26421 | 299 | 0.133655598 | 0.030744045 |
| SNP_A.K_990326_6_4710709    | 6  | 4710709  | 4.21E-05 | 0.19398 | 299 | 0.133652778 | 0.030747067 |
| SNP_A.K_709851_4_8299584    | 4  | 8299584  | 4.21E-05 | 0.07525 | 299 | 0.13365049  | 0.030747484 |
| SNP_A.K_1600700_9_18822430  | 9  | 18822430 | 4.22E-05 | 0.16221 | 299 | 0.133643236 | 0.03077224  |
| SNP_A.K_1001525_6_6487286   | 6  | 6487286  | 4.22E-05 | 0.29933 | 299 | 0.133638578 | 0.030784284 |
| SNP_A.K_981235_6_2810540    | 6  | 2810540  | 4.23E-05 | 0.02174 | 299 | 0.133629602 | 0.03081753  |
| SNP_A.K_978503_6_1707890    | 6  | 1707890  | 4.23E-05 | 0.26923 | 299 | 0.133625499 | 0.030823856 |
| SNP_A.K_306767_2_7348975    | 2  | 7348975  | 4.23E-05 | 0.2408  | 299 | 0.133623183 | 0.030823856 |
| SNP_A.K_708703_4_8087285    | 4  | 8087285  | 4.23E-05 | 0.08696 | 299 | 0.133621717 | 0.030823856 |
| SNP_A.K_1600950_9_18864583  | 9  | 18864583 | 4.25E-05 | 0.12375 | 299 | 0.133593665 | 0.030951069 |
| SNP_A.K_978421_6_1689373    | 6  | 1689373  | 4.26E-05 | 0.26589 | 299 | 0.133577935 | 0.031017869 |
| SNP_A.K_1001354_6_6466629   | 6  | 6466629  | 4.29E-05 | 0.301   | 299 | 0.133529173 | 0.031243151 |
| SNP_A.K_1004128_6_6836042   | 6  | 6836042  | 4.29E-05 | 0.42475 | 299 | 0.13352812  | 0.031243151 |
| SNP_A.K_709366_4_8258985    | 4  | 8258985  | 4.30E-05 | 0.08863 | 299 | 0.133513814 | 0.031288404 |
| SNP_A.K_710317_4_8336224    | 4  | 8336224  | 4.30E-05 | 0.07525 | 299 | 0.133513341 | 0.031288404 |
| SNP_A.K_1608658_9_20811050  | 9  | 20811050 | 4.31E-05 | 0.27258 | 299 | 0.133512457 | 0.031288404 |
| SNP_A.K_1804325_11_7061474  | 11 | 7061474  | 4.32E-05 | 0.01171 | 299 | 0.133496292 | 0.031358142 |
| SNP_A.K_1004354_6_6874923   | 6  | 6874923  | 4.32E-05 | 0.37291 | 299 | 0.133491307 | 0.031372107 |
| SNP_A.K_1488852_8_27109890  | 8  | 27109890 | 4.32E-05 | 0.301   | 299 | 0.133484931 | 0.031393042 |
| SNP_A.K_1001356_6_6466660   | 6  | 6466660  | 4.33E-05 | 0.29933 | 299 | 0.133481546 | 0.031399023 |
| SNP_A.K_513362_3_8240961    | 3  | 8240961  | 4.33E-05 | 0.03177 | 299 | 0.133477403 | 0.031408809 |
| SNP_A.K_690484_4_4430184    | 4  | 4430184  | 4.33E-05 | 0.03512 | 299 | 0.133474042 | 0.031414682 |
| SNP_A.K_709974_4_8304052    | 4  | 8304052  | 4.34E-05 | 0.07525 | 299 | 0.133468708 | 0.031430438 |
| SNP_A.K_999761_6_6312684    | 6  | 6312684  | 4.34E-05 | 0.30268 | 299 | 0.133463742 | 0.031434487 |
| SNP_A.K_977948_6_1623891    | 6  | 1623891  | 4.34E-05 | 0.20401 | 299 | 0.13346353  | 0.031434487 |
| SNP_A.K_997452_6_6100121    | 6  | 6100121  | 4.34E-05 | 0.37291 | 299 | 0.133460272 | 0.031439864 |
| SNP_A.K_1000970_6_6429793   | 6  | 6429793  | 4.35E-05 | 0.08528 | 299 | 0.133447889 | 0.031491003 |
| SNP_A.K_194493_1_30878501   | 1  | 30878501 | 4.36E-05 | 0.37291 | 299 | 0.133440003 | 0.031519636 |
| SNP_A.K_312180_2_7920505    | 2  | 7920505  | 4.36E-05 | 0.26589 | 299 | 0.133428526 | 0.031566354 |
| SNP_A.K_306741_2_7347106    | 2  | 7347106  | 4.37E-05 | 0.24916 | 299 | 0.133420673 | 0.031592324 |
| SNP_A.K_307500_2_7413232    | 2  | 7413232  | 4.37E-05 | 0.42475 | 299 | 0.133419004 | 0.031592324 |
| SNP_A.K_308616_2_7529715    | 2  | 7529715  | 4.37E-05 | 0.18729 | 299 | 0.133414599 | 0.031603532 |
| SNP_A.K_1924815_11_24669026 | 11 | 24669026 | 4.38E-05 | 0.01839 | 299 | 0.133402987 | 0.031612561 |
| SNP_A.K_1924832_11_24669843 | 11 | 24669843 | 4.38E-05 | 0.01839 | 299 | 0.133402987 | 0.031612561 |
| SNP_A.K_1924678_11_24662948 | 11 | 24662948 | 4.38E-05 | 0.01839 | 299 | 0.133402987 | 0.031612561 |
| SNP_A.K_1924680_11_24662984 | 11 | 24662984 | 4.38E-05 | 0.01839 | 299 | 0.133402987 | 0.031612561 |
| SNP_A.K_1001321_6_6465099   | 6  | 6465099  | 4.38E-05 | 0.29599 | 299 | 0.133401921 | 0.031612561 |
| SNP_A.K_995649_6_5946272    | 6  | 5946272  | 4.39E-05 | 0.4699  | 299 | 0.133390077 | 0.031661309 |
| SNP_A.K_709706_4_8282569    | 4  | 8282569  | 4.40E-05 | 0.0903  | 299 | 0.133373827 | 0.03173241  |
| SNP_A.K_1000915_6_6423464   | 6  | 6423464  | 4.40E-05 | 0.28428 | 299 | 0.133370828 | 0.031736584 |
| SNP_A.K_1001521_6_6487041   | 6  | 6487041  | 4.41E-05 | 0.30602 | 299 | 0.133366394 | 0.031748024 |
| SNP_A.K_723448_4_11457373   | 4  | 11457373 | 4.41E-05 | 0.0786  | 299 | 0.133364086 | 0.031748718 |
| SNP_A.K_1001466_6_6482649   | 6  | 6482649  | 4.41E-05 | 0.29431 | 299 | 0.133361612 | 0.031750249 |
| SNP_A.K_310601_2_7750247    | 2  | 7750247  | 4.41E-05 | 0.18896 | 299 | 0.133356573 | 0.031758055 |
| SNP_A.K_1001974_6_6533183   | 6  | 6533183  | 4.42E-05 | 0.4097  | 299 | 0.133353767 | 0.031758055 |
| SNP_A.K_678555_4_989658     | 4  | 989658   | 4.42E-05 | 0.10368 | 299 | 0.133353001 | 0.031758055 |
| SNP_A.K_996146_6_5964975    | 6  | 5964975  | 4.42E-05 | 0.33779 | 299 | 0.133351394 | 0.031758055 |

|                             |    |          |          |         |     |             |             |
|-----------------------------|----|----------|----------|---------|-----|-------------|-------------|
| SNP_A.K_996138_6_5964506    | 6  | 5964506  | 4.43E-05 | 0.33612 | 299 | 0.133333256 | 0.031838995 |
| SNP_A.K_10661_1_1870871     | 1  | 1870871  | 4.43E-05 | 0.02508 | 299 | 0.133326564 | 0.031861969 |
| SNP_A.K_978460_6_1695530    | 6  | 1695530  | 4.45E-05 | 0.25084 | 299 | 0.133301527 | 0.031977008 |
| SNP_A.K_307446_2_7408100    | 2  | 7408100  | 4.45E-05 | 0.29599 | 299 | 0.133298817 | 0.031977008 |
| SNP_A.K_1595429_9_17659880  | 9  | 17659880 | 4.46E-05 | 0.03679 | 299 | 0.133294137 | 0.031977008 |
| SNP_A.K_1382962_8_9125343   | 8  | 9125343  | 4.46E-05 | 0.28261 | 299 | 0.133293609 | 0.031977008 |
| SNP_A.K_673426_4_360850     | 4  | 360850   | 4.46E-05 | 0.13211 | 299 | 0.133293132 | 0.031977008 |
| SNP_A.K_1001574_6_6492463   | 6  | 6492463  | 4.48E-05 | 0.29766 | 299 | 0.133267475 | 0.032096983 |
| SNP_A.K_978081_6_1646331    | 6  | 1646331  | 4.48E-05 | 0.27926 | 299 | 0.13326178  | 0.032115069 |
| SNP_A.K_678721_4_995235     | 4  | 995235   | 4.50E-05 | 0.07525 | 299 | 0.133240836 | 0.032208285 |
| SNP_A.K_1830643_11_10572466 | 11 | 10572466 | 4.50E-05 | 0.16054 | 299 | 0.133239278 | 0.032208285 |
| SNP_A.K_1183407_7_4542597   | 7  | 4542597  | 4.50E-05 | 0.45652 | 299 | 0.133230936 | 0.032240049 |
| SNP_A.K_978956_6_1830253    | 6  | 1830253  | 4.51E-05 | 0.43144 | 299 | 0.13322647  | 0.032251913 |
| SNP_A.K_1578128_9_14012595  | 9  | 14012595 | 4.52E-05 | 0.05518 | 299 | 0.13320607  | 0.032345844 |
| SNP_A.K_710415_4_8349159    | 4  | 8349159  | 4.53E-05 | 0.15719 | 299 | 0.133194872 | 0.0323827   |
| SNP_A.K_1001527_6_6487331   | 6  | 6487331  | 4.53E-05 | 0.29766 | 299 | 0.133193065 | 0.0323827   |
| SNP_A.K_1608578_9_20789266  | 9  | 20789266 | 4.53E-05 | 0.22241 | 299 | 0.133192461 | 0.0323827   |
| SNP_A.K_1001506_6_6485316   | 6  | 6485316  | 4.54E-05 | 0.29766 | 299 | 0.133185084 | 0.032404398 |
| SNP_A.K_1184050_7_4647314   | 7  | 4647314  | 4.54E-05 | 0.05184 | 299 | 0.133183953 | 0.032404398 |
| SNP_A.K_710334_4_8336704    | 4  | 8336704  | 4.55E-05 | 0.07358 | 299 | 0.133167714 | 0.03247725  |
| SNP_A.K_993267_6_5728710    | 6  | 5728710  | 4.55E-05 | 0.25084 | 299 | 0.133164026 | 0.032477669 |
| SNP_A.K_1608508_9_20767377  | 9  | 20767377 | 4.55E-05 | 0.2709  | 299 | 0.133163331 | 0.032477669 |
| SNP_A.K_709938_4_8302518    | 4  | 8302518  | 4.55E-05 | 0.08863 | 299 | 0.133159397 | 0.032486909 |
| SNP_A.K_1001211_6_6455190   | 6  | 6455190  | 4.56E-05 | 0.36288 | 299 | 0.133148555 | 0.032531879 |
| SNP_A.K_709947_4_8302717    | 4  | 8302717  | 4.56E-05 | 0.07358 | 299 | 0.133146422 | 0.032531879 |
| SNP_A.K_996280_6_5981227    | 6  | 5981227  | 4.57E-05 | 0.27926 | 299 | 0.133139683 | 0.032546887 |
| SNP_A.K_978926_6_1807778    | 6  | 1807778  | 4.57E-05 | 0.32107 | 299 | 0.133139235 | 0.032546887 |
| SNP_A.K_1001413_6_6480208   | 6  | 6480208  | 4.57E-05 | 0.301   | 299 | 0.1331369   | 0.032547866 |
| SNP_A.K_310757_2_7765221    | 2  | 7765221  | 4.58E-05 | 0.19231 | 299 | 0.133128904 | 0.032578239 |
| SNP_A.K_709973_4_8303935    | 4  | 8303935  | 4.58E-05 | 0.07525 | 299 | 0.133117958 | 0.032623988 |
| SNP_A.K_1600732_9_18826824  | 9  | 18826824 | 4.59E-05 | 0.13545 | 299 | 0.133110375 | 0.032643118 |
| SNP_A.K_1924699_11_24663452 | 11 | 24663452 | 4.59E-05 | 0.02676 | 299 | 0.133108417 | 0.032643118 |
| SNP_A.K_375437_2_17971845   | 2  | 17971845 | 4.59E-05 | 0.05184 | 299 | 0.133107852 | 0.032643118 |
| SNP_A.K_1389600_8_10109469  | 8  | 10109469 | 4.60E-05 | 0.04682 | 299 | 0.133103059 | 0.032656923 |
| SNP_A.K_991248_6_4883785    | 6  | 4883785  | 4.60E-05 | 0.05017 | 299 | 0.133096708 | 0.032678853 |
| SNP_A.K_1004901_6_6951392   | 6  | 6951392  | 4.60E-05 | 0.35284 | 299 | 0.133090203 | 0.032690793 |
| SNP_A.K_1608757_9_20835803  | 9  | 20835803 | 4.60E-05 | 0.25418 | 299 | 0.133090137 | 0.032690793 |
| SNP_A.K_1001757_6_6514987   | 6  | 6514987  | 4.62E-05 | 0.29599 | 299 | 0.133070071 | 0.032784376 |
| SNP_A.K_978502_6_1707825    | 6  | 1707825  | 4.62E-05 | 0.26421 | 299 | 0.133067672 | 0.03278574  |
| SNP_A.K_990580_6_4726737    | 6  | 4726737  | 4.63E-05 | 0.48997 | 299 | 0.133053011 | 0.03285128  |
| SNP_A.K_1001464_6_6482465   | 6  | 6482465  | 4.64E-05 | 0.30268 | 299 | 0.133037145 | 0.032919356 |
| SNP_A.K_978439_6_1694076    | 6  | 1694076  | 4.65E-05 | 0.2709  | 299 | 0.133034082 | 0.032919356 |
| SNP_A.K_1001332_6_6466081   | 6  | 6466081  | 4.65E-05 | 0.29431 | 299 | 0.133033623 | 0.032919356 |
| SNP_A.K_1001112_6_6445573   | 6  | 6445573  | 4.67E-05 | 0.28763 | 299 | 0.13299732  | 0.033099221 |
| SNP_A.K_977871_6_1606052    | 6  | 1606052  | 4.68E-05 | 0.17893 | 299 | 0.132993894 | 0.033106044 |
| SNP_A.K_194669_1_30907718   | 1  | 30907718 | 4.68E-05 | 0.49833 | 299 | 0.132989068 | 0.033120269 |
| SNP_A.K_1608393_9_20744625  | 9  | 20744625 | 4.69E-05 | 0.26756 | 299 | 0.132976989 | 0.033162055 |
| SNP_A.K_1001199_6_6454785   | 6  | 6454785  | 4.69E-05 | 0.28763 | 299 | 0.132976779 | 0.033162055 |
| SNP_A.K_1183417_7_4550844   | 7  | 4550844  | 4.69E-05 | 0.44147 | 299 | 0.132974769 | 0.033162055 |
| SNP_A.K_1382668_8_9112821   | 8  | 9112821  | 4.69E-05 | 0.27926 | 299 | 0.132968772 | 0.033182515 |

|                             |    |          |          |         |     |             |             |
|-----------------------------|----|----------|----------|---------|-----|-------------|-------------|
| SNP_A.K_707412_4_7274495    | 4  | 7274495  | 4.71E-05 | 0.12876 | 299 | 0.132953185 | 0.033253816 |
| SNP_A.K_1001769_6_6519659   | 6  | 6519659  | 4.72E-05 | 0.29431 | 299 | 0.132930204 | 0.0333646   |
| SNP_A.K_1000891_6_6422360   | 6  | 6422360  | 4.73E-05 | 0.3913  | 299 | 0.13292302  | 0.033391523 |
| SNP_A.K_1001191_6_6454480   | 6  | 6454480  | 4.73E-05 | 0.4097  | 299 | 0.132920519 | 0.033393077 |
| SNP_A.K_1001810_6_6522193   | 6  | 6522193  | 4.73E-05 | 0.33612 | 299 | 0.132918476 | 0.033393077 |
| SNP_A.K_478931_3_2119566    | 3  | 2119566  | 4.74E-05 | 0.20569 | 299 | 0.132911542 | 0.033406709 |
| SNP_A.K_1001515_6_6486195   | 6  | 6486195  | 4.74E-05 | 0.29766 | 299 | 0.132907997 | 0.033406709 |
| SNP_A.K_1518023_9_3556650   | 9  | 3556650  | 4.74E-05 | 0.04849 | 299 | 0.132906385 | 0.033406709 |
| SNP_A.K_1000857_6_6421314   | 6  | 6421314  | 4.74E-05 | 0.28595 | 299 | 0.132906301 | 0.033406709 |
| SNP_A.K_218521_1_35301396   | 1  | 35301396 | 4.74E-05 | 0.15719 | 299 | 0.1329053   | 0.033406709 |
| SNP_A.K_1000991_6_6434353   | 6  | 6434353  | 4.75E-05 | 0.32776 | 299 | 0.132896024 | 0.033444858 |
| SNP_A.K_307487_2_7412193    | 2  | 7412193  | 4.75E-05 | 0.28428 | 299 | 0.132893179 | 0.033448723 |
| SNP_A.K_708508_4_8059153    | 4  | 8059153  | 4.75E-05 | 0.0903  | 299 | 0.13288907  | 0.033459338 |
| SNP_A.K_201238_1_32154591   | 1  | 32154591 | 4.76E-05 | 0.43813 | 299 | 0.132881073 | 0.033484295 |
| SNP_A.K_1002036_6_6537606   | 6  | 6537606  | 4.76E-05 | 0.31773 | 299 | 0.132879944 | 0.033484295 |
| SNP_A.K_456484_2_33043808   | 2  | 33043808 | 4.76E-05 | 0.12542 | 299 | 0.132876184 | 0.033484295 |
| SNP_A.K_29312_1_4223119     | 1  | 4223119  | 4.76E-05 | 0.08528 | 299 | 0.132875923 | 0.033484295 |
| SNP_A.K_1804145_11_7036188  | 11 | 7036188  | 4.78E-05 | 0.01171 | 299 | 0.132860556 | 0.033555148 |
| SNP_A.K_710400_4_8340448    | 4  | 8340448  | 4.79E-05 | 0.08863 | 299 | 0.132847832 | 0.033604282 |
| SNP_A.K_1364758_8_6039539   | 8  | 6039539  | 4.79E-05 | 0.11706 | 299 | 0.132847154 | 0.033604282 |
| SNP_A.K_145431_1_22973504   | 1  | 22973504 | 4.79E-05 | 0.04181 | 299 | 0.132844416 | 0.033607625 |
| SNP_A.K_978168_6_1657445    | 6  | 1657445  | 4.80E-05 | 0.16722 | 299 | 0.13283531  | 0.033645137 |
| SNP_A.K_1002032_6_6537549   | 6  | 6537549  | 4.80E-05 | 0.3194  | 299 | 0.132827945 | 0.033673343 |
| SNP_A.K_218927_1_35383812   | 1  | 35383812 | 4.81E-05 | 0.17224 | 299 | 0.132815827 | 0.033716446 |
| SNP_A.K_709839_4_8299274    | 4  | 8299274  | 4.81E-05 | 0.07692 | 299 | 0.132815704 | 0.033716446 |
| SNP_A.K_306970_2_7371140    | 2  | 7371140  | 4.82E-05 | 0.28595 | 299 | 0.132807746 | 0.033747915 |
| SNP_A.K_978353_6_1681467    | 6  | 1681467  | 4.83E-05 | 0.25084 | 299 | 0.132789859 | 0.033832965 |
| SNP_A.K_990416_6_4717114    | 6  | 4717114  | 4.83E-05 | 0.14047 | 299 | 0.13278736  | 0.033835075 |
| SNP_A.K_252893_1_40833008   | 1  | 40833008 | 4.84E-05 | 0.13545 | 299 | 0.132778558 | 0.033871227 |
| SNP_A.K_723964_4_11555307   | 4  | 11555307 | 4.84E-05 | 0.09699 | 299 | 0.132772613 | 0.033882322 |
| SNP_A.K_1004334_6_6869144   | 6  | 6869144  | 4.84E-05 | 0.47826 | 299 | 0.132772292 | 0.033882322 |
| SNP_A.K_306844_2_7359558    | 2  | 7359558  | 4.85E-05 | 0.25084 | 299 | 0.132762994 | 0.033906233 |
| SNP_A.K_999888_6_6331631    | 6  | 6331631  | 4.85E-05 | 0.17726 | 299 | 0.132759603 | 0.033906233 |
| SNP_A.K_307007_2_7372806    | 2  | 7372806  | 4.85E-05 | 0.24247 | 299 | 0.132758954 | 0.033906233 |
| SNP_A.K_306966_2_7371078    | 2  | 7371078  | 4.86E-05 | 0.2408  | 299 | 0.132757626 | 0.033906233 |
| SNP_A.K_891860_5_14667564   | 5  | 14667564 | 4.86E-05 | 0.04348 | 299 | 0.132754524 | 0.033906233 |
| SNP_A.K_690053_4_4370646    | 4  | 4370646  | 4.86E-05 | 0.03512 | 299 | 0.132754363 | 0.033906233 |
| SNP_A.K_1831294_11_10617044 | 11 | 10617044 | 4.86E-05 | 0.13211 | 299 | 0.132753145 | 0.033906233 |
| SNP_A.K_2078681_12_27008327 | 12 | 27008327 | 4.86E-05 | 0.01672 | 299 | 0.132749178 | 0.03391633  |
| SNP_A.K_1600749_9_18832562  | 9  | 18832562 | 4.87E-05 | 0.14716 | 299 | 0.132740862 | 0.033949981 |
| SNP_A.K_710055_4_8312932    | 4  | 8312932  | 4.88E-05 | 0.08027 | 299 | 0.132729917 | 0.033990887 |
| SNP_A.K_1004933_6_6954923   | 6  | 6954923  | 4.88E-05 | 0.30268 | 299 | 0.132727027 | 0.033990887 |
| SNP_A.K_306868_2_7361652    | 2  | 7361652  | 4.88E-05 | 0.23913 | 299 | 0.13272702  | 0.033990887 |
| SNP_A.K_1925491_11_24740300 | 11 | 24740300 | 4.88E-05 | 0.03512 | 299 | 0.132720201 | 0.034016507 |
| SNP_A.K_513950_3_8371268    | 3  | 8371268  | 4.90E-05 | 0.03177 | 299 | 0.13270239  | 0.034101909 |
| SNP_A.K_999084_6_6255049    | 6  | 6255049  | 4.90E-05 | 0.18395 | 299 | 0.132696103 | 0.034124723 |
| SNP_A.K_1002033_6_6537564   | 6  | 6537564  | 4.91E-05 | 0.32107 | 299 | 0.132689376 | 0.034146324 |
| SNP_A.K_710129_4_8317686    | 4  | 8317686  | 4.91E-05 | 0.07191 | 299 | 0.132687948 | 0.034146324 |
| SNP_A.K_1364940_8_6060842   | 8  | 6060842  | 4.92E-05 | 0.14214 | 299 | 0.132674913 | 0.03419686  |
| SNP_A.K_307372_2_7399623    | 2  | 7399623  | 4.92E-05 | 0.26756 | 299 | 0.132674494 | 0.03419686  |

|                             |    |          |          |         |     |             |             |
|-----------------------------|----|----------|----------|---------|-----|-------------|-------------|
| SNP_A.K_999572_6_6296929    | 6  | 6296929  | 4.92E-05 | 0.14047 | 299 | 0.132670845 | 0.034202139 |
| SNP_A.K_1383213_8_9134920   | 8  | 9134920  | 4.92E-05 | 0.27926 | 299 | 0.132669343 | 0.034202139 |
| SNP_A.K_307284_2_7391180    | 2  | 7391180  | 4.93E-05 | 0.24582 | 299 | 0.132662428 | 0.034228484 |
| SNP_A.K_170234_1_27321565   | 1  | 27321565 | 4.93E-05 | 0.01672 | 299 | 0.132658369 | 0.034239241 |
| SNP_A.K_709999_4_8305024    | 4  | 8305024  | 4.94E-05 | 0.09365 | 299 | 0.132651359 | 0.034260109 |
| SNP_A.K_1001334_6_6466119   | 6  | 6466119  | 4.94E-05 | 0.28763 | 299 | 0.132650373 | 0.034260109 |
| SNP_A.K_1262477_7_18237155  | 7  | 18237155 | 4.94E-05 | 0.01003 | 299 | 0.132645862 | 0.034264378 |
| SNP_A.K_902298_5_16467041   | 5  | 16467041 | 4.94E-05 | 0.05351 | 299 | 0.132643365 | 0.034264378 |
| SNP_A.K_978440_6_1694270    | 6  | 1694270  | 4.95E-05 | 0.26923 | 299 | 0.132643215 | 0.034264378 |
| SNP_A.K_307303_2_7393503    | 2  | 7393503  | 4.95E-05 | 0.28428 | 299 | 0.132641245 | 0.034264378 |
| SNP_A.K_1608529_9_20772659  | 9  | 20772659 | 4.95E-05 | 0.30602 | 299 | 0.13263625  | 0.034269291 |
| SNP_A.K_1001524_6_6487264   | 6  | 6487264  | 4.95E-05 | 0.29933 | 299 | 0.132636178 | 0.034269291 |
| SNP_A.K_328368_2_10227929   | 2  | 10227929 | 4.96E-05 | 0.0301  | 299 | 0.132626743 | 0.03430952  |
| SNP_A.K_194477_1_30877018   | 1  | 30877018 | 4.96E-05 | 0.4214  | 299 | 0.132619513 | 0.034337717 |
| SNP_A.K_1364927_8_6059438   | 8  | 6059438  | 4.97E-05 | 0.11706 | 299 | 0.132613479 | 0.034348383 |
| SNP_A.K_978356_6_1681580    | 6  | 1681580  | 4.97E-05 | 0.27592 | 299 | 0.132613403 | 0.034348383 |
| SNP_A.K_978249_6_1665555    | 6  | 1665555  | 4.97E-05 | 0.19732 | 299 | 0.132607271 | 0.034370601 |
| SNP_A.K_994746_6_5885600    | 6  | 5885600  | 4.98E-05 | 0.32274 | 299 | 0.132601156 | 0.03439274  |
| SNP_A.K_1001511_6_6485937   | 6  | 6485937  | 4.98E-05 | 0.301   | 299 | 0.13259597  | 0.034409796 |
| SNP_A.K_307018_2_7373163    | 2  | 7373163  | 4.99E-05 | 0.24582 | 299 | 0.132586393 | 0.034438139 |
| SNP_A.K_678668_4_993589     | 4  | 993589   | 4.99E-05 | 0.14381 | 299 | 0.132586366 | 0.034438139 |
| SNP_A.K_1831276_11_10615359 | 11 | 10615359 | 4.99E-05 | 0.13545 | 299 | 0.132584578 | 0.034438139 |
| SNP_A.K_991318_6_4924063    | 6  | 4924063  | 5.00E-05 | 0.05184 | 299 | 0.132576987 | 0.034467198 |
| SNP_A.K_277567_2_2951792    | 2  | 2951792  | 5.00E-05 | 0.07525 | 299 | 0.132575141 | 0.034467198 |
| SNP_A.K_709245_4_8242597    | 4  | 8242597  | 5.02E-05 | 0.10535 | 299 | 0.132554774 | 0.03456021  |
| SNP_A.K_1600692_9_18821938  | 9  | 18821938 | 5.03E-05 | 0.13378 | 299 | 0.132542616 | 0.03456021  |
| SNP_A.K_993232_6_5723162    | 6  | 5723162  | 5.03E-05 | 0.23244 | 299 | 0.132539595 | 0.03456021  |
| SNP_A.K_709781_4_8297600    | 4  | 8297600  | 5.03E-05 | 0.07191 | 299 | 0.132538111 | 0.03456021  |
| SNP_A.K_710478_4_8424155    | 4  | 8424155  | 5.03E-05 | 0.07191 | 299 | 0.132538111 | 0.03456021  |
| SNP_A.K_710491_4_8424867    | 4  | 8424867  | 5.03E-05 | 0.07191 | 299 | 0.132538111 | 0.03456021  |
| SNP_A.K_709811_4_8298263    | 4  | 8298263  | 5.03E-05 | 0.07191 | 299 | 0.132538111 | 0.03456021  |
| SNP_A.K_709889_4_8300393    | 4  | 8300393  | 5.03E-05 | 0.07191 | 299 | 0.132538111 | 0.03456021  |
| SNP_A.K_709890_4_8300404    | 4  | 8300404  | 5.03E-05 | 0.07191 | 299 | 0.132538111 | 0.03456021  |
| SNP_A.K_990271_6_4703970    | 6  | 4703970  | 5.03E-05 | 0.28428 | 299 | 0.132537538 | 0.03456021  |
| SNP_A.K_307673_2_7439718    | 2  | 7439718  | 5.03E-05 | 0.4699  | 299 | 0.132532434 | 0.034576964 |
| SNP_A.K_1005471_6_7015520   | 6  | 7015520  | 5.04E-05 | 0.36789 | 299 | 0.13252223  | 0.034621902 |
| SNP_A.K_725377_4_11799603   | 4  | 11799603 | 5.05E-05 | 0.10368 | 299 | 0.132515782 | 0.034641062 |
| SNP_A.K_736328_4_13863692   | 4  | 13863692 | 5.05E-05 | 0.02174 | 299 | 0.132514631 | 0.034641062 |
| SNP_A.K_326682_2_10038715   | 2  | 10038715 | 5.05E-05 | 0.06856 | 299 | 0.132508401 | 0.034664102 |
| SNP_A.K_991320_6_4925180    | 6  | 4925180  | 5.06E-05 | 0.05518 | 299 | 0.132502359 | 0.034686118 |
| SNP_A.K_1001108_6_6444719   | 6  | 6444719  | 5.07E-05 | 0.39465 | 299 | 0.132490285 | 0.034741587 |
| SNP_A.K_978415_6_1688913    | 6  | 1688913  | 5.08E-05 | 0.25084 | 299 | 0.132476971 | 0.03480404  |
| SNP_A.K_1001216_6_6455322   | 6  | 6455322  | 5.08E-05 | 0.29431 | 299 | 0.132474083 | 0.034808624 |
| SNP_A.K_709960_4_8303544    | 4  | 8303544  | 5.08E-05 | 0.0786  | 299 | 0.132470003 | 0.034819846 |
| SNP_A.K_1005511_6_7017893   | 6  | 7017893  | 5.09E-05 | 0.45318 | 299 | 0.132464102 | 0.034841193 |
| SNP_A.K_678676_4_993666     | 4  | 993666   | 5.10E-05 | 0.08027 | 299 | 0.132445797 | 0.034921704 |
| SNP_A.K_1001743_6_6512565   | 6  | 6512565  | 5.10E-05 | 0.29933 | 299 | 0.132444228 | 0.034921704 |
| SNP_A.K_990398_6_4715599    | 6  | 4715599  | 5.11E-05 | 0.20736 | 299 | 0.132442547 | 0.034921704 |
| SNP_A.K_978187_6_1658641    | 6  | 1658641  | 5.11E-05 | 0.24749 | 299 | 0.132441408 | 0.034921704 |
| SNP_A.K_218885_1_35377097   | 1  | 35377097 | 5.11E-05 | 0.15552 | 299 | 0.132437492 | 0.034930623 |

|                             |    |          |          |         |     |             |             |
|-----------------------------|----|----------|----------|---------|-----|-------------|-------------|
| SNP_A.K_129747_1_18608511   | 1  | 18608511 | 5.11E-05 | 0.34615 | 299 | 0.132435694 | 0.034930623 |
| SNP_A.K_195105_1_31045650   | 1  | 31045650 | 5.12E-05 | 0.4214  | 299 | 0.132431004 | 0.034945312 |
| SNP_A.K_709662_4_8279620    | 4  | 8279620  | 5.12E-05 | 0.08863 | 299 | 0.132428437 | 0.034948171 |
| SNP_A.K_793819_4_26293740   | 4  | 26293740 | 5.12E-05 | 0.03512 | 299 | 0.132423478 | 0.034955603 |
| SNP_A.K_994787_6_5889002    | 6  | 5889002  | 5.12E-05 | 0.27926 | 299 | 0.132422996 | 0.034955603 |
| SNP_A.K_673168_4_329777     | 4  | 329777   | 5.13E-05 | 0.10535 | 299 | 0.132415159 | 0.034987892 |
| SNP_A.K_1600724_9_18826447  | 9  | 18826447 | 5.13E-05 | 0.15217 | 299 | 0.132408093 | 0.035015908 |
| SNP_A.K_1002030_6_6537520   | 6  | 6537520  | 5.14E-05 | 0.31773 | 299 | 0.132401867 | 0.03502038  |
| SNP_A.K_992572_6_5659479    | 6  | 5659479  | 5.14E-05 | 0.49666 | 299 | 0.13240142  | 0.03502038  |
| SNP_A.K_1854276_11_14365813 | 11 | 14365813 | 5.14E-05 | 0.07023 | 299 | 0.13240114  | 0.03502038  |
| SNP_A.K_1001657_6_6501047   | 6  | 6501047  | 5.14E-05 | 0.44147 | 299 | 0.132398406 | 0.035024203 |
| SNP_A.K_28910_1_4181265     | 1  | 4181265  | 5.14E-05 | 0.11037 | 299 | 0.132395821 | 0.035027204 |
| SNP_A.K_710328_4_8336593    | 4  | 8336593  | 5.15E-05 | 0.07525 | 299 | 0.132389395 | 0.035051688 |
| SNP_A.K_1608653_9_20810683  | 9  | 20810683 | 5.15E-05 | 0.35619 | 299 | 0.132383848 | 0.03505513  |
| SNP_A.K_908188_5_17488720   | 5  | 17488720 | 5.15E-05 | 0.02341 | 299 | 0.132383483 | 0.03505513  |
| SNP_A.K_710399_4_8340356    | 4  | 8340356  | 5.16E-05 | 0.07692 | 299 | 0.132382639 | 0.03505513  |
| SNP_A.K_312079_2_7904690    | 2  | 7904690  | 5.16E-05 | 0.26923 | 299 | 0.132376809 | 0.035076317 |
| SNP_A.K_1004902_6_6951396   | 6  | 6951396  | 5.16E-05 | 0.35284 | 299 | 0.13237152  | 0.035094489 |
| SNP_A.K_478910_3_2116439    | 3  | 2116439  | 5.17E-05 | 0.20401 | 299 | 0.13236141  | 0.035139714 |
| SNP_A.K_1608479_9_20762642  | 9  | 20762642 | 5.18E-05 | 0.29599 | 299 | 0.132358107 | 0.035146781 |
| SNP_A.K_194271_1_30837003   | 1  | 30837003 | 5.18E-05 | 0.38462 | 299 | 0.132353608 | 0.035160568 |
| SNP_A.K_990460_6_4718899    | 6  | 4718899  | 5.19E-05 | 0.1505  | 299 | 0.132336476 | 0.035245383 |
| SNP_A.K_978166_6_1656871    | 6  | 1656871  | 5.19E-05 | 0.26421 | 299 | 0.132334394 | 0.035245611 |
| SNP_A.K_526646_3_10954259   | 3  | 10954259 | 5.20E-05 | 0.01672 | 299 | 0.132324075 | 0.035292235 |
| SNP_A.K_1925566_11_24745599 | 11 | 24745599 | 5.21E-05 | 0.0301  | 299 | 0.132321591 | 0.035294737 |
| SNP_A.K_1123826_6_23600406  | 6  | 23600406 | 5.21E-05 | 0.01672 | 299 | 0.132315233 | 0.035319079 |
| SNP_A.K_710061_4_8313271    | 4  | 8313271  | 5.22E-05 | 0.09197 | 299 | 0.132308683 | 0.035344536 |
| SNP_A.K_307502_2_7413268    | 2  | 7413268  | 5.22E-05 | 0.42809 | 299 | 0.132299536 | 0.03538468  |
| SNP_A.K_978844_6_1787313    | 6  | 1787313  | 5.24E-05 | 0.39465 | 299 | 0.132283782 | 0.035462269 |
| SNP_A.K_996193_6_5973917    | 6  | 5973917  | 5.25E-05 | 0.3194  | 299 | 0.132271163 | 0.035522249 |
| SNP_A.K_1364879_8_6050366   | 8  | 6050366  | 5.25E-05 | 0.1204  | 299 | 0.132263734 | 0.035552855 |
| SNP_A.K_990310_6_4709952    | 6  | 4709952  | 5.26E-05 | 0.20234 | 299 | 0.132251832 | 0.035603489 |
| SNP_A.K_995693_6_5947977    | 6  | 5947977  | 5.26E-05 | 0.34281 | 299 | 0.132250753 | 0.035603489 |
| SNP_A.K_1001522_6_6487092   | 6  | 6487092  | 5.27E-05 | 0.33779 | 299 | 0.1322461   | 0.035605668 |
| SNP_A.K_992581_6_5659693    | 6  | 5659693  | 5.27E-05 | 0.49833 | 299 | 0.13224427  | 0.035605668 |
| SNP_A.K_992583_6_5659700    | 6  | 5659700  | 5.27E-05 | 0.49833 | 299 | 0.13224427  | 0.035605668 |
| SNP_A.K_1001161_6_6449818   | 6  | 6449818  | 5.27E-05 | 0.31104 | 299 | 0.132239193 | 0.035620949 |
| SNP_A.K_1830742_11_10577129 | 11 | 10577129 | 5.28E-05 | 0.39298 | 299 | 0.132235661 | 0.035620949 |
| SNP_A.K_198079_1_31695460   | 1  | 31695460 | 5.28E-05 | 0.301   | 299 | 0.132235489 | 0.035620949 |
| SNP_A.K_1834781_11_10971546 | 11 | 10971546 | 5.28E-05 | 0.25251 | 299 | 0.132231474 | 0.035632244 |
| SNP_A.K_326924_2_10070831   | 2  | 10070831 | 5.29E-05 | 0.07525 | 299 | 0.132221215 | 0.03567911  |
| SNP_A.K_1600712_9_18822800  | 9  | 18822800 | 5.29E-05 | 0.12375 | 299 | 0.132215872 | 0.035698003 |
| SNP_A.K_1001806_6_6522087   | 6  | 6522087  | 5.32E-05 | 0.29933 | 299 | 0.132181257 | 0.03588429  |
| SNP_A.K_1001803_6_6521650   | 6  | 6521650  | 5.34E-05 | 0.33779 | 299 | 0.132164107 | 0.035971074 |
| SNP_A.K_1001256_6_6459260   | 6  | 6459260  | 5.35E-05 | 0.28261 | 299 | 0.132149077 | 0.036045868 |
| SNP_A.K_1830685_11_10574298 | 11 | 10574298 | 5.35E-05 | 0.46823 | 299 | 0.132146883 | 0.036046834 |
| SNP_A.K_481527_3_2743339    | 3  | 2743339  | 5.36E-05 | 0.03679 | 299 | 0.132134009 | 0.036109359 |
| SNP_A.K_978100_6_1647185    | 6  | 1647185  | 5.38E-05 | 0.26254 | 299 | 0.132115625 | 0.036203851 |
| SNP_A.K_978345_6_1679921    | 6  | 1679921  | 5.43E-05 | 0.25251 | 299 | 0.132061827 | 0.036504539 |
| SNP_A.K_307281_2_7391116    | 2  | 7391116  | 5.44E-05 | 0.26254 | 299 | 0.132050764 | 0.03655032  |

|                             |    |          |          |         |     |             |             |
|-----------------------------|----|----------|----------|---------|-----|-------------|-------------|
| SNP_A.K_456471_2_33041697   | 2  | 33041697 | 5.44E-05 | 0.08194 | 299 | 0.132049937 | 0.03655032  |
| SNP_A.K_710216_4_8322463    | 4  | 8322463  | 5.44E-05 | 0.09197 | 299 | 0.132042425 | 0.036578525 |
| SNP_A.K_977880_6_1610216    | 6  | 1610216  | 5.44E-05 | 0.26087 | 299 | 0.132041067 | 0.036578525 |
| SNP_A.K_326495_2_10015069   | 2  | 10015069 | 5.45E-05 | 0.07191 | 299 | 0.132036927 | 0.036590914 |
| SNP_A.K_996072_6_5960700    | 6  | 5960700  | 5.46E-05 | 0.29431 | 299 | 0.132024932 | 0.036649281 |
| SNP_A.K_201312_1_32162596   | 1  | 32162596 | 5.46E-05 | 0.43478 | 299 | 0.132021662 | 0.036656609 |
| SNP_A.K_978949_6_1822540    | 6  | 1822540  | 5.47E-05 | 0.46823 | 299 | 0.132012648 | 0.036697607 |
| SNP_A.K_709885_4_8300285    | 4  | 8300285  | 5.47E-05 | 0.07525 | 299 | 0.132010012 | 0.036701235 |
| SNP_A.K_1001280_6_6461013   | 6  | 6461013  | 5.48E-05 | 0.37458 | 299 | 0.132002901 | 0.036721559 |
| SNP_A.K_1144895_6_27617770  | 6  | 27617770 | 5.48E-05 | 0.04013 | 299 | 0.132002514 | 0.036721559 |
| SNP_A.K_902240_5_16463207   | 5  | 16463207 | 5.49E-05 | 0.05351 | 299 | 0.131991725 | 0.036773079 |
| SNP_A.K_307269_2_7389562    | 2  | 7389562  | 5.49E-05 | 0.27592 | 299 | 0.131987124 | 0.036788279 |
| SNP_A.K_1019185_6_9019957   | 6  | 9019957  | 5.50E-05 | 0.11706 | 299 | 0.131981967 | 0.036806759 |
| SNP_A.K_710131_4_8317731    | 4  | 8317731  | 5.50E-05 | 0.07525 | 299 | 0.131979126 | 0.036811627 |
| SNP_A.K_1595495_9_17675180  | 9  | 17675180 | 5.50E-05 | 0.03679 | 299 | 0.131974459 | 0.036827244 |
| SNP_A.K_709582_4_8274798    | 4  | 8274798  | 5.51E-05 | 0.08528 | 299 | 0.131966769 | 0.036852088 |
| SNP_A.K_992006_6_5608032    | 6  | 5608032  | 5.51E-05 | 0.18729 | 299 | 0.131966215 | 0.036852088 |
| SNP_A.K_751795_4_17707948   | 4  | 17707948 | 5.52E-05 | 0.02341 | 299 | 0.131959106 | 0.036882121 |
| SNP_A.K_1925823_11_24765641 | 11 | 24765641 | 5.52E-05 | 0.02676 | 299 | 0.131954773 | 0.036895814 |
| SNP_A.K_1001484_6_6483625   | 6  | 6483625  | 5.52E-05 | 0.29599 | 299 | 0.131950248 | 0.036910652 |
| SNP_A.K_992582_6_5659697    | 6  | 5659697  | 5.53E-05 | 0.5     | 299 | 0.131945686 | 0.036925712 |
| SNP_A.K_1924721_11_24664444 | 11 | 24664444 | 5.53E-05 | 0.02007 | 299 | 0.131939855 | 0.03694828  |
| SNP_A.K_456677_2_33104538   | 2  | 33104538 | 5.53E-05 | 0.02843 | 299 | 0.131937443 | 0.036950667 |
| SNP_A.K_1001980_6_6533310   | 6  | 6533310  | 5.54E-05 | 0.42809 | 299 | 0.131933094 | 0.0369645   |
| SNP_A.K_990246_6_4702953    | 6  | 4702953  | 5.54E-05 | 0.2107  | 299 | 0.131927447 | 0.036986015 |
| SNP_A.K_306733_2_7346454    | 2  | 7346454  | 5.57E-05 | 0.29097 | 299 | 0.131903585 | 0.037115431 |
| SNP_A.K_709502_4_8270852    | 4  | 8270852  | 5.58E-05 | 0.10368 | 299 | 0.131888884 | 0.037191077 |
| SNP_A.K_995528_6_5940256    | 6  | 5940256  | 5.59E-05 | 0.48829 | 299 | 0.131876186 | 0.037241996 |
| SNP_A.K_991238_6_4882965    | 6  | 4882965  | 5.59E-05 | 0.04682 | 299 | 0.131874531 | 0.037241996 |
| SNP_A.K_1001716_6_6508659   | 6  | 6508659  | 5.59E-05 | 0.31271 | 299 | 0.131874269 | 0.037241996 |
| SNP_A.K_195042_1_31039638   | 1  | 31039638 | 5.60E-05 | 0.37793 | 299 | 0.131868973 | 0.03726161  |
| SNP_A.K_978327_6_1678577    | 6  | 1678577  | 5.60E-05 | 0.26756 | 299 | 0.131864911 | 0.037273881 |
| SNP_A.K_1001711_6_6507958   | 6  | 6507958  | 5.63E-05 | 0.29933 | 299 | 0.131835594 | 0.037436972 |
| SNP_A.K_1830671_11_10573467 | 11 | 10573467 | 5.63E-05 | 0.36957 | 299 | 0.131827566 | 0.037472143 |
| SNP_A.K_181485_1_29141129   | 1  | 29141129 | 5.63E-05 | 0.43813 | 299 | 0.13182572  | 0.037472143 |
| SNP_A.K_978064_6_1644682    | 6  | 1644682  | 5.64E-05 | 0.21405 | 299 | 0.131822817 | 0.037477558 |
| SNP_A.K_1001583_6_6492984   | 6  | 6492984  | 5.64E-05 | 0.31104 | 299 | 0.131819628 | 0.037484698 |
| SNP_A.K_992571_6_5659468    | 6  | 5659468  | 5.65E-05 | 0.49833 | 299 | 0.131804263 | 0.037562821 |
| SNP_A.K_522889_3_10225662   | 3  | 10225662 | 5.66E-05 | 0.2291  | 299 | 0.131800899 | 0.037562821 |
| SNP_A.K_901334_5_16287066   | 5  | 16287066 | 5.66E-05 | 0.04013 | 299 | 0.131799223 | 0.037562821 |
| SNP_A.K_194465_1_30875707   | 1  | 30875707 | 5.66E-05 | 0.40803 | 299 | 0.131798617 | 0.037562821 |
| SNP_A.K_307498_2_7413097    | 2  | 7413097  | 5.67E-05 | 0.24415 | 299 | 0.131786461 | 0.03762388  |
| SNP_A.K_1364880_8_6050393   | 8  | 6050393  | 5.67E-05 | 0.11873 | 299 | 0.131783356 | 0.037630564 |
| SNP_A.K_708723_4_8089101    | 4  | 8089101  | 5.68E-05 | 0.09866 | 299 | 0.131776518 | 0.037659718 |
| SNP_A.K_673070_4_314722     | 4  | 314722   | 5.68E-05 | 0.1505  | 299 | 0.131771252 | 0.037668449 |
| SNP_A.K_218884_1_35377052   | 1  | 35377052 | 5.68E-05 | 0.16221 | 299 | 0.131771083 | 0.037668449 |
| SNP_A.K_978433_6_1691449    | 6  | 1691449  | 5.70E-05 | 0.26589 | 299 | 0.131755805 | 0.03774854  |
| SNP_A.K_1608714_9_20820151  | 9  | 20820151 | 5.70E-05 | 0.24749 | 299 | 0.131753224 | 0.037752106 |
| SNP_A.K_978451_6_1694719    | 6  | 1694719  | 5.72E-05 | 0.27759 | 299 | 0.131733135 | 0.037861488 |
| SNP_A.K_710133_4_8317751    | 4  | 8317751  | 5.73E-05 | 0.07692 | 299 | 0.131726191 | 0.037891492 |

|                             |    |          |          |         |     |             |             |
|-----------------------------|----|----------|----------|---------|-----|-------------|-------------|
| SNP_A.K_1001282_6_6461312   | 6  | 6461312  | 5.74E-05 | 0.36789 | 299 | 0.131714531 | 0.03795012  |
| SNP_A.K_1002034_6_6537591   | 6  | 6537591  | 5.75E-05 | 0.32107 | 299 | 0.131697438 | 0.038041878 |
| SNP_A.K_991236_6_4882861    | 6  | 4882861  | 5.76E-05 | 0.04013 | 299 | 0.131690643 | 0.038071128 |
| SNP_A.K_1713933_10_15025418 | 10 | 15025418 | 5.76E-05 | 0.25418 | 299 | 0.131684995 | 0.038089143 |
| SNP_A.K_1803408_11_6911996  | 11 | 6911996  | 5.76E-05 | 0.02174 | 299 | 0.131683712 | 0.038089143 |
| SNP_A.K_1000808_6_6417296   | 6  | 6417296  | 5.78E-05 | 0.3311  | 299 | 0.131670651 | 0.038156649 |
| SNP_A.K_1002050_6_6538246   | 6  | 6538246  | 5.78E-05 | 0.32107 | 299 | 0.13166483  | 0.038180058 |
| SNP_A.K_1183402_7_4541134   | 7  | 4541134  | 5.79E-05 | 0.4097  | 299 | 0.131657214 | 0.038214452 |
| SNP_A.K_308292_2_7488561    | 2  | 7488561  | 5.80E-05 | 0.20903 | 299 | 0.131645608 | 0.038262216 |
| SNP_A.K_991137_6_4831548    | 6  | 4831548  | 5.80E-05 | 0.04013 | 299 | 0.131643961 | 0.038262216 |
| SNP_A.K_1001326_6_6465288   | 6  | 6465288  | 5.80E-05 | 0.30602 | 299 | 0.131643454 | 0.038262216 |
| SNP_A.K_1831326_11_10619447 | 11 | 10619447 | 5.81E-05 | 0.11873 | 299 | 0.131636886 | 0.038281373 |
| SNP_A.K_996370_6_5995006    | 6  | 5995006  | 5.81E-05 | 0.47659 | 299 | 0.131636361 | 0.038281373 |
| SNP_A.K_995734_6_5949212    | 6  | 5949212  | 5.81E-05 | 0.40134 | 299 | 0.131631784 | 0.038297273 |
| SNP_A.K_1083969_6_17403949  | 6  | 17403949 | 5.81E-05 | 0.21237 | 299 | 0.131629699 | 0.038297923 |
| SNP_A.K_181159_1_29077823   | 1  | 29077823 | 5.82E-05 | 0.42809 | 299 | 0.131623627 | 0.038308764 |
| SNP_A.K_312487_2_7965672    | 2  | 7965672  | 5.82E-05 | 0.19064 | 299 | 0.131623473 | 0.038308764 |
| SNP_A.K_1804320_11_7061281  | 11 | 7061281  | 5.82E-05 | 0.01171 | 299 | 0.131620017 | 0.038308764 |
| SNP_A.K_1803414_11_6912303  | 11 | 6912303  | 5.82E-05 | 0.01171 | 299 | 0.131620017 | 0.038308764 |
| SNP_A.K_218481_1_35296610   | 1  | 35296610 | 5.83E-05 | 0.1689  | 299 | 0.13161521  | 0.038326108 |
| SNP_A.K_194457_1_30874598   | 1  | 30874598 | 5.83E-05 | 0.36622 | 299 | 0.131611914 | 0.038334198 |
| SNP_A.K_999248_6_6270673    | 6  | 6270673  | 5.83E-05 | 0.16555 | 299 | 0.131608858 | 0.038340824 |
| SNP_A.K_709952_4_8302863    | 4  | 8302863  | 5.84E-05 | 0.09532 | 299 | 0.131606259 | 0.038344134 |
| SNP_A.K_20610_1_3099378     | 1  | 3099378  | 5.84E-05 | 0.00502 | 299 | 0.13160437  | 0.038344134 |
| SNP_A.K_195523_1_31222507   | 1  | 31222507 | 5.84E-05 | 0.49164 | 299 | 0.131599146 | 0.038356347 |
| SNP_A.K_709802_4_8298031    | 4  | 8298031  | 5.84E-05 | 0.07525 | 299 | 0.131598433 | 0.038356347 |
| SNP_A.K_1001212_6_6455205   | 6  | 6455205  | 5.85E-05 | 0.28763 | 299 | 0.131592145 | 0.03836468  |
| SNP_A.K_1001425_6_6481372   | 6  | 6481372  | 5.85E-05 | 0.30769 | 299 | 0.131591931 | 0.03836468  |
| SNP_A.K_998869_6_6229807    | 6  | 6229807  | 5.85E-05 | 0.27926 | 299 | 0.13158955  | 0.03836468  |
| SNP_A.K_201232_1_32153804   | 1  | 32153804 | 5.85E-05 | 0.42809 | 299 | 0.131587697 | 0.03836468  |
| SNP_A.K_1383135_8_9131670   | 8  | 9131670  | 5.85E-05 | 0.27258 | 299 | 0.131587222 | 0.03836468  |
| SNP_A.K_978129_6_1649024    | 6  | 1649024  | 5.88E-05 | 0.1806  | 299 | 0.131560591 | 0.038508652 |
| SNP_A.K_1001465_6_6482468   | 6  | 6482468  | 5.88E-05 | 0.30602 | 299 | 0.131559862 | 0.038508652 |
| SNP_A.K_978390_6_1685715    | 6  | 1685715  | 5.88E-05 | 0.26923 | 299 | 0.131555426 | 0.038523858 |
| SNP_A.K_194459_1_30874622   | 1  | 30874622 | 5.89E-05 | 0.36957 | 299 | 0.131552755 | 0.038527419 |
| SNP_A.K_1000638_6_6402851   | 6  | 6402851  | 5.89E-05 | 0.35284 | 299 | 0.131550915 | 0.038527419 |
| SNP_A.K_709969_4_8303779    | 4  | 8303779  | 5.89E-05 | 0.07358 | 299 | 0.131543333 | 0.038549927 |
| SNP_A.K_709876_4_8300143    | 4  | 8300143  | 5.89E-05 | 0.07358 | 299 | 0.131543333 | 0.038549927 |
| SNP_A.K_1002025_6_6537424   | 6  | 6537424  | 5.90E-05 | 0.31271 | 299 | 0.131538397 | 0.038562691 |
| SNP_A.K_308535_2_7524767    | 2  | 7524767  | 5.90E-05 | 0.42977 | 299 | 0.131537335 | 0.038562691 |
| SNP_A.K_708722_4_8089099    | 4  | 8089099  | 5.91E-05 | 0.09866 | 299 | 0.131532373 | 0.038581193 |
| SNP_A.K_997905_6_6156521    | 6  | 6156521  | 5.91E-05 | 0.17057 | 299 | 0.131527673 | 0.038586099 |
| SNP_A.K_2065394_12_24383567 | 12 | 24383567 | 5.91E-05 | 0.03512 | 299 | 0.131527653 | 0.038586099 |
| SNP_A.K_710036_4_8310467    | 4  | 8310467  | 5.91E-05 | 0.07692 | 299 | 0.13152422  | 0.038595186 |
| SNP_A.K_687687_4_3571074    | 4  | 3571074  | 5.92E-05 | 0.10702 | 299 | 0.1315175   | 0.038624573 |
| SNP_A.K_309936_2_7688972    | 2  | 7688972  | 5.93E-05 | 0.10702 | 299 | 0.131505876 | 0.038671562 |
| SNP_A.K_1803735_11_6970719  | 11 | 6970719  | 5.93E-05 | 0.03512 | 299 | 0.131505329 | 0.038671562 |
| SNP_A.K_995731_6_5949184    | 6  | 5949184  | 5.93E-05 | 0.49498 | 299 | 0.131504021 | 0.038671562 |
| SNP_A.K_1924668_11_24662752 | 11 | 24662752 | 5.94E-05 | 0.02007 | 299 | 0.131495525 | 0.038712021 |
| SNP_A.K_992004_6_5607984    | 6  | 5607984  | 5.95E-05 | 0.2709  | 299 | 0.131487684 | 0.038737557 |



|                             |    |          |          |         |     |             |             |
|-----------------------------|----|----------|----------|---------|-----|-------------|-------------|
| SNP_A.K_194979_1_31019147   | 1  | 31019147 | 5.95E-05 | 0.44147 | 299 | 0.131487488 | 0.038737557 |
| SNP_A.K_1184234_7_4689402   | 7  | 4689402  | 5.95E-05 | 0.05518 | 299 | 0.131484634 | 0.038741417 |
| SNP_A.K_1001773_6_6519750   | 6  | 6519750  | 5.95E-05 | 0.30268 | 299 | 0.131482013 | 0.038741417 |
| SNP_A.K_218495_1_35297108   | 1  | 35297108 | 5.95E-05 | 0.17391 | 299 | 0.131480999 | 0.038741417 |
| SNP_A.K_708721_4_8089093    | 4  | 8089093  | 5.96E-05 | 0.09866 | 299 | 0.131477869 | 0.038748702 |
| SNP_A.K_725571_4_11822284   | 4  | 11822284 | 5.96E-05 | 0.0903  | 299 | 0.131473706 | 0.038761884 |
| SNP_A.K_977901_6_1617816    | 6  | 1617816  | 5.96E-05 | 0.26087 | 299 | 0.131471836 | 0.038761884 |
| SNP_A.K_996226_6_5976079    | 6  | 5976079  | 5.96E-05 | 0.38629 | 299 | 0.131469866 | 0.038761997 |
| SNP_A.K_710039_4_8311360    | 4  | 8311360  | 5.97E-05 | 0.07358 | 299 | 0.131463785 | 0.038768057 |
| SNP_A.K_978420_6_1689366    | 6  | 1689366  | 5.97E-05 | 0.26923 | 299 | 0.131461022 | 0.038768057 |
| SNP_A.K_1001494_6_6484010   | 6  | 6484010  | 5.97E-05 | 0.29933 | 299 | 0.131460888 | 0.038768057 |
| SNP_A.K_977870_6_1605936    | 6  | 1605936  | 5.97E-05 | 0.18562 | 299 | 0.131460335 | 0.038768057 |
| SNP_A.K_710536_4_8426700    | 4  | 8426700  | 5.98E-05 | 0.0786  | 299 | 0.131458571 | 0.038768057 |
| SNP_A.K_1608486_9_20763215  | 9  | 20763215 | 5.98E-05 | 0.29599 | 299 | 0.131457188 | 0.038768057 |
| SNP_A.K_218485_1_35296802   | 1  | 35296802 | 5.98E-05 | 0.16722 | 299 | 0.13145187  | 0.038788954 |
| SNP_A.K_978453_6_1694761    | 6  | 1694761  | 5.99E-05 | 0.27425 | 299 | 0.131447481 | 0.038796449 |
| SNP_A.K_1726583_10_16600997 | 10 | 16600997 | 5.99E-05 | 0.08361 | 299 | 0.131446769 | 0.038796449 |
| SNP_A.K_218033_1_35217472   | 1  | 35217472 | 6.01E-05 | 0.02007 | 299 | 0.131426804 | 0.038908425 |
| SNP_A.K_1526503_9_5069568   | 9  | 5069568  | 6.01E-05 | 0.02174 | 299 | 0.131424651 | 0.03890972  |
| SNP_A.K_1389907_8_10135203  | 8  | 10135203 | 6.02E-05 | 0.05853 | 299 | 0.131416955 | 0.03894044  |
| SNP_A.K_306944_2_7370256    | 2  | 7370256  | 6.02E-05 | 0.4097  | 299 | 0.131415828 | 0.03894044  |
| SNP_A.K_1001109_6_6444885   | 6  | 6444885  | 6.02E-05 | 0.38629 | 299 | 0.13141311  | 0.038945265 |
| SNP_A.K_992588_6_5659786    | 6  | 5659786  | 6.03E-05 | 0.5     | 299 | 0.131402029 | 0.039002236 |
| SNP_A.K_253132_1_40864632   | 1  | 40864632 | 6.03E-05 | 0.16054 | 299 | 0.131397633 | 0.039017545 |
| SNP_A.K_710035_4_8310403    | 4  | 8310403  | 6.04E-05 | 0.07692 | 299 | 0.131394347 | 0.03902594  |
| SNP_A.K_216399_1_34966419   | 1  | 34966419 | 6.05E-05 | 0.07692 | 299 | 0.131378186 | 0.039114817 |
| SNP_A.K_993152_6_5710655    | 6  | 5710655  | 6.06E-05 | 0.18227 | 299 | 0.131374433 | 0.039126161 |
| SNP_A.K_978462_6_1696048    | 6  | 1696048  | 6.06E-05 | 0.24582 | 299 | 0.131371691 | 0.039126514 |
| SNP_A.K_1001227_6_6456028   | 6  | 6456028  | 6.06E-05 | 0.37291 | 299 | 0.131370497 | 0.039126514 |
| SNP_A.K_709878_4_8300175    | 4  | 8300175  | 6.08E-05 | 0.07525 | 299 | 0.131354617 | 0.03921388  |
| SNP_A.K_992593_6_5660116    | 6  | 5660116  | 6.08E-05 | 0.49666 | 299 | 0.13134752  | 0.039246259 |
| SNP_A.K_900435_5_16188756   | 5  | 16188756 | 6.09E-05 | 0.06689 | 299 | 0.131344644 | 0.039252153 |
| SNP_A.K_1805292_11_7146168  | 11 | 7146168  | 6.09E-05 | 0.10535 | 299 | 0.131339313 | 0.039273469 |
| SNP_A.K_1601992_9_19102345  | 9  | 19102345 | 6.10E-05 | 0.0602  | 299 | 0.131329358 | 0.039313202 |
| SNP_A.K_1001568_6_6492304   | 6  | 6492304  | 6.10E-05 | 0.30268 | 299 | 0.131329122 | 0.039313202 |
| SNP_A.K_843882_5_1006233    | 5  | 1006233  | 6.11E-05 | 0.04181 | 299 | 0.131318514 | 0.039362375 |
| SNP_A.K_999116_6_6257653    | 6  | 6257653  | 6.11E-05 | 0.16054 | 299 | 0.131317439 | 0.039362375 |
| SNP_A.K_1004363_6_6876587   | 6  | 6876587  | 6.14E-05 | 0.34615 | 299 | 0.131283894 | 0.039554106 |
| SNP_A.K_307491_2_7412879    | 2  | 7412879  | 6.15E-05 | 0.26087 | 299 | 0.131282464 | 0.039554106 |
| SNP_A.K_978303_6_1671898    | 6  | 1671898  | 6.15E-05 | 0.24749 | 299 | 0.131280264 | 0.039554106 |
| SNP_A.K_523141_3_10260089   | 3  | 10260089 | 6.15E-05 | 0.22074 | 299 | 0.131279339 | 0.039554106 |
| SNP_A.K_1001078_6_6439943   | 6  | 6439943  | 6.17E-05 | 0.39465 | 299 | 0.131259118 | 0.039670032 |
| SNP_A.K_1602093_9_19123657  | 9  | 19123657 | 6.17E-05 | 0.04181 | 299 | 0.131256392 | 0.039675083 |
| SNP_A.K_1962888_12_5098184  | 12 | 5098184  | 6.18E-05 | 0.04348 | 299 | 0.131252081 | 0.039690204 |
| SNP_A.K_709829_4_8299088    | 4  | 8299088  | 6.19E-05 | 0.07692 | 299 | 0.131242296 | 0.039740127 |
| SNP_A.K_2078883_12_27031072 | 12 | 27031072 | 6.20E-05 | 0.02007 | 299 | 0.131227282 | 0.039822219 |
| SNP_A.K_2081243_12_27449747 | 12 | 27449747 | 6.20E-05 | 0.0301  | 299 | 0.131225544 | 0.039822219 |
| SNP_A.K_1002120_6_6541964   | 6  | 6541964  | 6.21E-05 | 0.32776 | 299 | 0.131213203 | 0.039882308 |
| SNP_A.K_1103427_6_20632795  | 6  | 20632795 | 6.22E-05 | 0.03846 | 299 | 0.131212268 | 0.039882308 |
| SNP_A.K_218526_1_35302712   | 1  | 35302712 | 6.22E-05 | 0.15385 | 299 | 0.131208269 | 0.039886395 |

|                             |    |          |          |         |     |             |             |
|-----------------------------|----|----------|----------|---------|-----|-------------|-------------|
| SNP_A.K_992714_6_5675130    | 6  | 5675130  | 6.22E-05 | 0.47157 | 299 | 0.131207776 | 0.039886395 |
| SNP_A.K_1001531_6_6487586   | 6  | 6487586  | 6.22E-05 | 0.29933 | 299 | 0.13120468  | 0.039892185 |
| SNP_A.K_218781_1_35351224   | 1  | 35351224 | 6.22E-05 | 0.16221 | 299 | 0.13120302  | 0.039892185 |
| SNP_A.K_978738_6_1772768    | 6  | 1772768  | 6.23E-05 | 0.3612  | 299 | 0.13120076  | 0.039894328 |
| SNP_A.K_312486_2_7965659    | 2  | 7965659  | 6.24E-05 | 0.08194 | 299 | 0.13119008  | 0.039927266 |
| SNP_A.K_753058_4_18150504   | 4  | 18150504 | 6.24E-05 | 0.27425 | 299 | 0.131189995 | 0.039927266 |
| SNP_A.K_978854_6_1788336    | 6  | 1788336  | 6.24E-05 | 0.36288 | 299 | 0.131189002 | 0.039927266 |
| SNP_A.K_1924730_11_24664729 | 11 | 24664729 | 6.24E-05 | 0.02007 | 299 | 0.131187574 | 0.039927266 |
| SNP_A.K_1608602_9_20792561  | 9  | 20792561 | 6.24E-05 | 0.24749 | 299 | 0.131185994 | 0.039927266 |
| SNP_A.K_673449_4_362758     | 4  | 362758   | 6.25E-05 | 0.0602  | 299 | 0.131179727 | 0.039945204 |
| SNP_A.K_286420_2_4764123    | 2  | 4764123  | 6.25E-05 | 0.07358 | 299 | 0.131179348 | 0.039945204 |
| SNP_A.K_1608496_9_20763808  | 9  | 20763808 | 6.26E-05 | 0.301   | 299 | 0.131170853 | 0.039987265 |
| SNP_A.K_1364856_8_6049652   | 8  | 6049652  | 6.26E-05 | 0.09365 | 299 | 0.131167746 | 0.039994875 |
| SNP_A.K_710418_4_8360802    | 4  | 8360802  | 6.27E-05 | 0.12375 | 299 | 0.131162249 | 0.040017794 |
| SNP_A.K_1162247_6_30626209  | 6  | 30626209 | 6.27E-05 | 0.2893  | 299 | 0.131155535 | 0.040048527 |
| SNP_A.K_218480_1_35296510   | 1  | 35296510 | 6.28E-05 | 0.23077 | 299 | 0.131147454 | 0.040088061 |
| SNP_A.K_993630_6_5780447    | 6  | 5780447  | 6.29E-05 | 0.29264 | 299 | 0.131139474 | 0.040126985 |
| SNP_A.K_1503680_9_1049850   | 9  | 1049850  | 6.29E-05 | 0.0602  | 299 | 0.131135912 | 0.040137561 |
| SNP_A.K_978306_6_1672070    | 6  | 1672070  | 6.30E-05 | 0.18227 | 299 | 0.131129456 | 0.040157521 |
| SNP_A.K_978279_6_1666920    | 6  | 1666920  | 6.30E-05 | 0.17726 | 299 | 0.131128978 | 0.040157521 |
| SNP_A.K_1804317_11_7061234  | 11 | 7061234  | 6.31E-05 | 0.01171 | 299 | 0.131117489 | 0.040215371 |
| SNP_A.K_1001146_6_6449374   | 6  | 6449374  | 6.31E-05 | 0.2893  | 299 | 0.131115271 | 0.040215371 |
| SNP_A.K_708831_4_8115405    | 4  | 8115405  | 6.31E-05 | 0.09365 | 299 | 0.131114245 | 0.040215371 |
| SNP_A.K_978309_6_1672380    | 6  | 1672380  | 6.32E-05 | 0.17559 | 299 | 0.131108012 | 0.0402432   |
| SNP_A.K_1001148_6_6449411   | 6  | 6449411  | 6.33E-05 | 0.29766 | 299 | 0.131101932 | 0.040270061 |
| SNP_A.K_990607_6_4728216    | 6  | 4728216  | 6.33E-05 | 0.37793 | 299 | 0.131095029 | 0.040297269 |
| SNP_A.K_307041_2_7374680    | 2  | 7374680  | 6.33E-05 | 0.2107  | 299 | 0.131093893 | 0.040297269 |
| SNP_A.K_218967_1_35389720   | 1  | 35389720 | 6.34E-05 | 0.15719 | 299 | 0.131086787 | 0.040330802 |
| SNP_A.K_1831299_11_10617499 | 11 | 10617499 | 6.35E-05 | 0.13545 | 299 | 0.131082026 | 0.040349218 |
| SNP_A.K_210165_1_33958333   | 1  | 33958333 | 6.35E-05 | 0.02341 | 299 | 0.13107726  | 0.040367683 |
| SNP_A.K_678657_4_993420     | 4  | 993420   | 6.35E-05 | 0.07191 | 299 | 0.13107411  | 0.040375712 |
| SNP_A.K_978452_6_1694730    | 6  | 1694730  | 6.36E-05 | 0.27425 | 299 | 0.131069032 | 0.040396211 |
| SNP_A.K_1001469_6_6482736   | 6  | 6482736  | 6.36E-05 | 0.28428 | 299 | 0.131066354 | 0.040401206 |
| SNP_A.K_709813_4_8298307    | 4  | 8298307  | 6.37E-05 | 0.07358 | 299 | 0.131059057 | 0.040434305 |
| SNP_A.K_871271_5_5373815    | 5  | 5373815  | 6.37E-05 | 0.2107  | 299 | 0.131057428 | 0.040434305 |
| SNP_A.K_709697_4_8282154    | 4  | 8282154  | 6.37E-05 | 0.09197 | 299 | 0.131055105 | 0.040437013 |
| SNP_A.K_1004966_6_6958803   | 6  | 6958803  | 6.38E-05 | 0.30435 | 299 | 0.131046641 | 0.040479499 |
| SNP_A.K_1004283_6_6862737   | 6  | 6862737  | 6.39E-05 | 0.17391 | 299 | 0.131034553 | 0.040545551 |
| SNP_A.K_277566_2_2951780    | 2  | 2951780  | 6.40E-05 | 0.08696 | 299 | 0.131031171 | 0.040555154 |
| SNP_A.K_1382891_8_9121263   | 8  | 9121263  | 6.40E-05 | 0.27258 | 299 | 0.131027631 | 0.040565792 |
| SNP_A.K_1001333_6_6466095   | 6  | 6466095  | 6.41E-05 | 0.28595 | 299 | 0.131020212 | 0.040601637 |
| SNP_A.K_1600936_9_18862695  | 9  | 18862695 | 6.42E-05 | 0.12876 | 299 | 0.131008446 | 0.040665811 |
| SNP_A.K_978955_6_1828735    | 6  | 1828735  | 6.42E-05 | 0.44649 | 299 | 0.13100628  | 0.040667541 |
| SNP_A.K_1399766_8_11032536  | 8  | 11032536 | 6.43E-05 | 0.07358 | 299 | 0.131002684 | 0.040678588 |
| SNP_A.K_307035_2_7374410    | 2  | 7374410  | 6.44E-05 | 0.2291  | 299 | 0.13099146  | 0.040739361 |
| SNP_A.K_978724_6_1771541    | 6  | 1771541  | 6.44E-05 | 0.44314 | 299 | 0.130985868 | 0.040763462 |
| SNP_A.K_1001538_6_6487981   | 6  | 6487981  | 6.46E-05 | 0.301   | 299 | 0.130975951 | 0.040815828 |
| SNP_A.K_1001424_6_6481306   | 6  | 6481306  | 6.47E-05 | 0.32776 | 299 | 0.130965715 | 0.04086866  |
| SNP_A.K_2030037_12_17237414 | 12 | 17237414 | 6.47E-05 | 0.16722 | 299 | 0.130962706 | 0.04086866  |
| SNP_A.K_389606_2_19886611   | 2  | 19886611 | 6.47E-05 | 0.0602  | 299 | 0.130962182 | 0.04086866  |

|                             |    |          |          |         |     |             |             |
|-----------------------------|----|----------|----------|---------|-----|-------------|-------------|
| SNP_A.K_1600922_9_18862177  | 9  | 18862177 | 6.47E-05 | 0.17224 | 299 | 0.130958884 | 0.040868756 |
| SNP_A.K_307209_2_7384979    | 2  | 7384979  | 6.47E-05 | 0.44816 | 299 | 0.130958377 | 0.040868756 |
| SNP_A.K_1383138_8_9131767   | 8  | 9131767  | 6.48E-05 | 0.27592 | 299 | 0.130954206 | 0.040879381 |
| SNP_A.K_139103_1_22285115   | 1  | 22285115 | 6.48E-05 | 0.13211 | 299 | 0.130952966 | 0.040879381 |
| SNP_A.K_310109_2_7698068    | 2  | 7698068  | 6.48E-05 | 0.35452 | 299 | 0.130949416 | 0.040890232 |
| SNP_A.K_1421832_8_14601562  | 8  | 14601562 | 6.49E-05 | 0.01338 | 299 | 0.130945993 | 0.040900253 |
| SNP_A.K_995768_6_5950267    | 6  | 5950267  | 6.49E-05 | 0.48662 | 299 | 0.130941207 | 0.040919211 |
| SNP_A.K_671553_4_163298     | 4  | 163298   | 6.49E-05 | 0.05853 | 299 | 0.130939153 | 0.040920274 |
| SNP_A.K_1001486_6_6483641   | 6  | 6483641  | 6.50E-05 | 0.29933 | 299 | 0.130937165 | 0.040920911 |
| SNP_A.K_1383035_8_9128069   | 8  | 9128069  | 6.51E-05 | 0.15719 | 299 | 0.13092758  | 0.040971362 |
| SNP_A.K_1002031_6_6537546   | 6  | 6537546  | 6.51E-05 | 0.32107 | 299 | 0.130923148 | 0.040987611 |
| SNP_A.K_1960654_12_4797089  | 12 | 4797089  | 6.51E-05 | 0.03177 | 299 | 0.130920537 | 0.040987611 |
| SNP_A.K_709933_4_8302431    | 4  | 8302431  | 6.51E-05 | 0.09699 | 299 | 0.130919437 | 0.040987611 |
| SNP_A.K_996821_6_6029884    | 6  | 6029884  | 6.53E-05 | 0.3796  | 299 | 0.13090055  | 0.041090615 |
| SNP_A.K_307010_2_7372969    | 2  | 7372969  | 6.53E-05 | 0.24582 | 299 | 0.130899987 | 0.041090615 |
| SNP_A.K_672587_4_264369     | 4  | 264369   | 6.55E-05 | 0.14047 | 299 | 0.130881511 | 0.041199911 |
| SNP_A.K_498995_3_5793736    | 3  | 5793736  | 6.58E-05 | 0.03846 | 299 | 0.130860898 | 0.041312224 |
| SNP_A.K_978075_6_1645459    | 6  | 1645459  | 6.58E-05 | 0.25084 | 299 | 0.13086074  | 0.041312224 |
| SNP_A.K_326843_2_10060386   | 2  | 10060386 | 6.59E-05 | 0.07358 | 299 | 0.130847687 | 0.041386171 |
| SNP_A.K_995349_6_5927522    | 6  | 5927522  | 6.59E-05 | 0.23077 | 299 | 0.130845147 | 0.041390524 |
| SNP_A.K_709246_4_8242605    | 4  | 8242605  | 6.61E-05 | 0.1087  | 299 | 0.130831731 | 0.041463474 |
| SNP_A.K_29237_1_4218802     | 1  | 4218802  | 6.61E-05 | 0.08361 | 299 | 0.130830385 | 0.041463474 |
| SNP_A.K_1001312_6_6464052   | 6  | 6464052  | 6.61E-05 | 0.28595 | 299 | 0.130828151 | 0.041465803 |
| SNP_A.K_533405_3_12166294   | 3  | 12166294 | 6.63E-05 | 0.04682 | 299 | 0.1308111   | 0.041566663 |
| SNP_A.K_1001507_6_6485400   | 6  | 6485400  | 6.64E-05 | 0.29933 | 299 | 0.130802976 | 0.04160789  |
| SNP_A.K_978465_6_1696692    | 6  | 1696692  | 6.64E-05 | 0.33612 | 299 | 0.130801149 | 0.04160789  |
| SNP_A.K_1390037_8_10146112  | 8  | 10146112 | 6.66E-05 | 0.05518 | 299 | 0.130777181 | 0.04174488  |
| SNP_A.K_978870_6_1793665    | 6  | 1793665  | 6.66E-05 | 0.31104 | 299 | 0.130776866 | 0.04174488  |
| SNP_A.K_978165_6_1656674    | 6  | 1656674  | 6.67E-05 | 0.17559 | 299 | 0.130767344 | 0.041796016 |
| SNP_A.K_1005052_6_6966455   | 6  | 6966455  | 6.68E-05 | 0.07525 | 299 | 0.130763863 | 0.041797733 |
| SNP_A.K_992587_6_5659762    | 6  | 5659762  | 6.68E-05 | 0.49833 | 299 | 0.130763332 | 0.041797733 |
| SNP_A.K_710046_4_8312233    | 4  | 8312233  | 6.69E-05 | 0.07358 | 299 | 0.130755336 | 0.041838719 |
| SNP_A.K_195041_1_31039631   | 1  | 31039631 | 6.70E-05 | 0.41639 | 299 | 0.130748032 | 0.041875108 |
| SNP_A.K_308787_2_7553888    | 2  | 7553888  | 6.70E-05 | 0.41472 | 299 | 0.130741024 | 0.041883532 |
| SNP_A.K_278117_2_3027954    | 2  | 3027954  | 6.70E-05 | 0.08027 | 299 | 0.130740676 | 0.041883532 |
| SNP_A.K_993450_6_5752285    | 6  | 5752285  | 6.70E-05 | 0.15217 | 299 | 0.130739712 | 0.041883532 |
| SNP_A.K_1004994_6_6960871   | 6  | 6960871  | 6.70E-05 | 0.30936 | 299 | 0.130739276 | 0.041883532 |
| SNP_A.K_710490_4_8424788    | 4  | 8424788  | 6.73E-05 | 0.07358 | 299 | 0.130717925 | 0.042012652 |
| SNP_A.K_2059179_12_23313148 | 12 | 23313148 | 6.73E-05 | 0.02508 | 299 | 0.130714796 | 0.042012652 |
| SNP_A.K_1924639_11_24661532 | 11 | 24661532 | 6.73E-05 | 0.04348 | 299 | 0.130714441 | 0.042012652 |
| SNP_A.K_978685_6_1761242    | 6  | 1761242  | 6.73E-05 | 0.38462 | 299 | 0.130711918 | 0.042017034 |
| SNP_A.K_1002042_6_6537823   | 6  | 6537823  | 6.74E-05 | 0.30602 | 299 | 0.13070811  | 0.042030072 |
| SNP_A.K_306797_2_7351618    | 2  | 7351618  | 6.74E-05 | 0.26589 | 299 | 0.130704872 | 0.042039285 |
| SNP_A.K_1000684_6_6411598   | 6  | 6411598  | 6.75E-05 | 0.28428 | 299 | 0.130697848 | 0.042074006 |
| SNP_A.K_999053_6_6250072    | 6  | 6250072  | 6.76E-05 | 0.13211 | 299 | 0.130690323 | 0.042112137 |
| SNP_A.K_29324_1_4224401     | 1  | 4224401  | 6.76E-05 | 0.08696 | 299 | 0.130687109 | 0.042121215 |
| SNP_A.K_993659_6_5781869    | 6  | 5781869  | 6.77E-05 | 0.28595 | 299 | 0.130680265 | 0.0421548   |
| SNP_A.K_235244_1_38434142   | 1  | 38434142 | 6.78E-05 | 0.02676 | 299 | 0.130671194 | 0.042203473 |
| SNP_A.K_307534_2_7416090    | 2  | 7416090  | 6.78E-05 | 0.27425 | 299 | 0.130667088 | 0.0422109   |
| SNP_A.K_456674_2_33104137   | 2  | 33104137 | 6.78E-05 | 0.02341 | 299 | 0.130665202 | 0.0422109   |

|                             |    |          |          |         |     |             |             |
|-----------------------------|----|----------|----------|---------|-----|-------------|-------------|
| SNP_A.K_710028_4_8309717    | 4  | 8309717  | 6.79E-05 | 0.07525 | 299 | 0.130664496 | 0.0422109   |
| SNP_A.K_1924938_11_24680768 | 11 | 24680768 | 6.79E-05 | 0.02174 | 299 | 0.130658188 | 0.042240958 |
| SNP_A.K_1000886_6_6422273   | 6  | 6422273  | 6.80E-05 | 0.28595 | 299 | 0.130646683 | 0.042302159 |
| SNP_A.K_1001758_6_6515000   | 6  | 6515000  | 6.81E-05 | 0.30602 | 299 | 0.130645421 | 0.042302159 |
| SNP_A.K_990319_6_4710290    | 6  | 4710290  | 6.81E-05 | 0.20234 | 299 | 0.130643266 | 0.042304138 |
| SNP_A.K_306984_2_7371889    | 2  | 7371889  | 6.81E-05 | 0.24916 | 299 | 0.130640845 | 0.042307917 |
| SNP_A.K_990375_6_4712689    | 6  | 4712689  | 6.82E-05 | 0.20067 | 299 | 0.130636483 | 0.042315281 |
| SNP_A.K_218580_1_35319113   | 1  | 35319113 | 6.82E-05 | 0.29097 | 299 | 0.130636034 | 0.042315281 |
| SNP_A.K_307473_2_7409900    | 2  | 7409900  | 6.82E-05 | 0.33278 | 299 | 0.130629486 | 0.042335046 |
| SNP_A.K_523324_3_10297916   | 3  | 10297916 | 6.82E-05 | 0.21405 | 299 | 0.130629398 | 0.042335046 |
| SNP_A.K_534804_3_12562190   | 3  | 12562190 | 6.83E-05 | 0.02007 | 299 | 0.130621373 | 0.042376875 |
| SNP_A.K_1804394_11_7066859  | 11 | 7066859  | 6.84E-05 | 0.01338 | 299 | 0.13061813  | 0.042386267 |
| SNP_A.K_978136_6_1650499    | 6  | 1650499  | 6.86E-05 | 0.1689  | 299 | 0.130592426 | 0.04254851  |
| SNP_A.K_1001262_6_6459770   | 6  | 6459770  | 6.88E-05 | 0.39967 | 299 | 0.130578732 | 0.04262927  |
| SNP_A.K_310991_2_7785307    | 2  | 7785307  | 6.90E-05 | 0.19231 | 299 | 0.130556716 | 0.042767186 |
| SNP_A.K_307030_2_7374032    | 2  | 7374032  | 6.91E-05 | 0.22742 | 299 | 0.13055262  | 0.042777536 |
| SNP_A.K_709831_4_8299168    | 4  | 8299168  | 6.91E-05 | 0.07525 | 299 | 0.130551492 | 0.042777536 |
| SNP_A.K_691046_4_4526203    | 4  | 4526203  | 6.92E-05 | 0.05853 | 299 | 0.130545241 | 0.042806204 |
| SNP_A.K_1001706_6_6507517   | 6  | 6507517  | 6.92E-05 | 0.30268 | 299 | 0.130543599 | 0.042806204 |
| SNP_A.K_306753_2_7347883    | 2  | 7347883  | 6.92E-05 | 0.35619 | 299 | 0.130539003 | 0.042825013 |
| SNP_A.K_1004983_6_6959674   | 6  | 6959674  | 6.93E-05 | 0.31438 | 299 | 0.130535217 | 0.042838271 |
| SNP_A.K_28837_1_4169679     | 1  | 4169679  | 6.93E-05 | 0.04849 | 299 | 0.130530445 | 0.042858302 |
| SNP_A.K_307666_2_7439471    | 2  | 7439471  | 6.94E-05 | 0.26756 | 299 | 0.130524541 | 0.042886131 |
| SNP_A.K_1383010_8_9127220   | 8  | 9127220  | 6.94E-05 | 0.26923 | 299 | 0.130519496 | 0.042908081 |
| SNP_A.K_710333_4_8336697    | 4  | 8336697  | 6.96E-05 | 0.07692 | 299 | 0.130506634 | 0.042983849 |
| SNP_A.K_1925185_11_24711727 | 11 | 24711727 | 6.97E-05 | 0.02007 | 299 | 0.130495841 | 0.043045479 |
| SNP_A.K_1383030_8_9127826   | 8  | 9127826  | 6.98E-05 | 0.30602 | 299 | 0.130486621 | 0.043060497 |
| SNP_A.K_1002011_6_6537068   | 6  | 6537068  | 6.98E-05 | 0.29933 | 299 | 0.130486575 | 0.043060497 |
| SNP_A.K_2078688_12_27009239 | 12 | 27009239 | 6.98E-05 | 0.02007 | 299 | 0.130484441 | 0.043060497 |
| SNP_A.K_709201_4_8238580    | 4  | 8238580  | 6.98E-05 | 0.09532 | 299 | 0.130484396 | 0.043060497 |
| SNP_A.K_2078570_12_26996490 | 12 | 26996490 | 6.98E-05 | 0.02007 | 299 | 0.130484341 | 0.043060497 |
| SNP_A.K_760869_4_19812951   | 4  | 19812951 | 6.99E-05 | 0.04348 | 299 | 0.130481429 | 0.043060497 |
| SNP_A.K_725432_4_11813682   | 4  | 11813682 | 6.99E-05 | 0.09699 | 299 | 0.130478501 | 0.043060497 |
| SNP_A.K_673338_4_349585     | 4  | 349585   | 6.99E-05 | 0.09532 | 299 | 0.130477959 | 0.043060497 |
| SNP_A.K_192889_1_30593972   | 1  | 30593972 | 6.99E-05 | 0.5     | 299 | 0.130477027 | 0.043060497 |
| SNP_A.K_1001483_6_6483425   | 6  | 6483425  | 7.00E-05 | 0.30268 | 299 | 0.130466676 | 0.043119231 |
| SNP_A.K_1001617_6_6498514   | 6  | 6498514  | 7.01E-05 | 0.40301 | 299 | 0.130462706 | 0.043133909 |
| SNP_A.K_1830600_11_10569524 | 11 | 10569524 | 7.01E-05 | 0.17726 | 299 | 0.130459761 | 0.043141521 |
| SNP_A.K_996619_6_6012312    | 6  | 6012312  | 7.02E-05 | 0.39967 | 299 | 0.130450356 | 0.043190309 |
| SNP_A.K_1005592_6_7028921   | 6  | 7028921  | 7.03E-05 | 0.32609 | 299 | 0.130447658 | 0.043190309 |
| SNP_A.K_1001543_6_6488610   | 6  | 6488610  | 7.03E-05 | 0.30769 | 299 | 0.130445592 | 0.043190309 |
| SNP_A.K_218899_1_35380756   | 1  | 35380756 | 7.03E-05 | 0.16388 | 299 | 0.130445335 | 0.043190309 |
| SNP_A.K_990256_6_4703429    | 6  | 4703429  | 7.03E-05 | 0.16388 | 299 | 0.130440934 | 0.043208029 |
| SNP_A.K_805664_4_29334216   | 4  | 29334216 | 7.04E-05 | 0.0301  | 299 | 0.130435669 | 0.043231741 |
| SNP_A.K_990317_6_4710279    | 6  | 4710279  | 7.04E-05 | 0.20401 | 299 | 0.130431037 | 0.043251083 |
| SNP_A.K_1025773_6_10085549  | 6  | 10085549 | 7.05E-05 | 0.03512 | 299 | 0.130426435 | 0.043270232 |
| SNP_A.K_307163_2_7382840    | 2  | 7382840  | 7.05E-05 | 0.26421 | 299 | 0.130423313 | 0.043279127 |
| SNP_A.K_1001329_6_6466014   | 6  | 6466014  | 7.06E-05 | 0.30602 | 299 | 0.130418362 | 0.043297893 |
| SNP_A.K_978326_6_1678478    | 6  | 1678478  | 7.06E-05 | 0.2709  | 299 | 0.13041693  | 0.043297893 |
| SNP_A.K_277247_2_2932074    | 2  | 2932074  | 7.07E-05 | 0.07525 | 299 | 0.13041227  | 0.043317482 |

|                             |    |          |          |         |     |             |             |
|-----------------------------|----|----------|----------|---------|-----|-------------|-------------|
| SNP_A.K_1000988_6_6434182   | 6  | 6434182  | 7.08E-05 | 0.33445 | 299 | 0.130400635 | 0.043375013 |
| SNP_A.K_1432903_8_16598101  | 8  | 16598101 | 7.08E-05 | 0.10368 | 299 | 0.130400315 | 0.043375013 |
| SNP_A.K_2078561_12_26996305 | 12 | 26996305 | 7.08E-05 | 0.09866 | 299 | 0.130398022 | 0.043378186 |
| SNP_A.K_709695_4_8281716    | 4  | 8281716  | 7.09E-05 | 0.08696 | 299 | 0.130386058 | 0.043442157 |
| SNP_A.K_993223_6_5722509    | 6  | 5722509  | 7.10E-05 | 0.24247 | 299 | 0.130383457 | 0.043442157 |
| SNP_A.K_1382988_8_9125963   | 8  | 9125963  | 7.10E-05 | 0.27258 | 299 | 0.130383322 | 0.043442157 |
| SNP_A.K_1364861_8_6049795   | 8  | 6049795  | 7.13E-05 | 0.1204  | 299 | 0.130356131 | 0.043619091 |
| SNP_A.K_1364932_8_6060163   | 8  | 6060163  | 7.13E-05 | 0.1204  | 299 | 0.130353322 | 0.043626621 |
| SNP_A.K_995660_6_5946669    | 6  | 5946669  | 7.14E-05 | 0.05184 | 299 | 0.130348001 | 0.043650307 |
| SNP_A.K_311098_2_7789692    | 2  | 7789692  | 7.14E-05 | 0.19398 | 299 | 0.130343547 | 0.043668655 |
| SNP_A.K_990393_6_4715003    | 6  | 4715003  | 7.15E-05 | 0.45485 | 299 | 0.130339935 | 0.043674202 |
| SNP_A.K_1365370_8_6107312   | 8  | 6107312  | 7.15E-05 | 0.09699 | 299 | 0.130339092 | 0.043674202 |
| SNP_A.K_307429_2_7404088    | 2  | 7404088  | 7.15E-05 | 0.25585 | 299 | 0.130333997 | 0.043697059 |
| SNP_A.K_523295_3_10290840   | 3  | 10290840 | 7.16E-05 | 0.21572 | 299 | 0.130331665 | 0.043700574 |
| SNP_A.K_709226_4_8241858    | 4  | 8241858  | 7.17E-05 | 0.0903  | 299 | 0.130317935 | 0.043784019 |
| SNP_A.K_312167_2_7918709    | 2  | 7918709  | 7.19E-05 | 0.33278 | 299 | 0.130305399 | 0.043859236 |
| SNP_A.K_793835_4_26300907   | 4  | 26300907 | 7.19E-05 | 0.03344 | 299 | 0.130303542 | 0.043859435 |
| SNP_A.K_995630_6_5944101    | 6  | 5944101  | 7.20E-05 | 0.45485 | 299 | 0.130296549 | 0.04388857  |
| SNP_A.K_1000683_6_6411592   | 6  | 6411592  | 7.20E-05 | 0.2893  | 299 | 0.130295745 | 0.04388857  |
| SNP_A.K_207451_1_33404904   | 1  | 33404904 | 7.20E-05 | 0.02174 | 299 | 0.130293436 | 0.043891957 |
| SNP_A.K_1001641_6_6499888   | 6  | 6499888  | 7.21E-05 | 0.46154 | 299 | 0.130284423 | 0.043942562 |
| SNP_A.K_992586_6_5659756    | 6  | 5659756  | 7.22E-05 | 0.5     | 299 | 0.130279603 | 0.043963659 |
| SNP_A.K_992579_6_5659615    | 6  | 5659615  | 7.24E-05 | 0.5     | 299 | 0.130262104 | 0.044074275 |
| SNP_A.K_77910_1_10906282    | 1  | 10906282 | 7.25E-05 | 0.29599 | 299 | 0.130255019 | 0.044111459 |
| SNP_A.K_1389916_8_10135422  | 8  | 10135422 | 7.25E-05 | 0.0602  | 299 | 0.130248291 | 0.044138356 |
| SNP_A.K_1001286_6_6461809   | 6  | 6461809  | 7.26E-05 | 0.28595 | 299 | 0.130245988 | 0.044138356 |
| SNP_A.K_201153_1_32138883   | 1  | 32138883 | 7.26E-05 | 0.42977 | 299 | 0.130245747 | 0.044138356 |
| SNP_A.K_728240_4_12294071   | 4  | 12294071 | 7.26E-05 | 0.21739 | 299 | 0.130243648 | 0.044140311 |
| SNP_A.K_29061_1_4201884     | 1  | 4201884  | 7.27E-05 | 0.14381 | 299 | 0.130233083 | 0.044202231 |
| SNP_A.K_709015_4_8212878    | 4  | 8212878  | 7.30E-05 | 0.09699 | 299 | 0.130211225 | 0.044344467 |
| SNP_A.K_978436_6_1693411    | 6  | 1693411  | 7.30E-05 | 0.25418 | 299 | 0.130205917 | 0.044368665 |
| SNP_A.K_1004291_6_6863017   | 6  | 6863017  | 7.30E-05 | 0.36789 | 299 | 0.130204182 | 0.044368665 |
| SNP_A.K_456510_2_33052726   | 2  | 33052726 | 7.32E-05 | 0.02341 | 299 | 0.130193286 | 0.044433027 |
| SNP_A.K_710041_4_8311863    | 4  | 8311863  | 7.32E-05 | 0.07358 | 299 | 0.130191503 | 0.044433027 |
| SNP_A.K_996823_6_6029917    | 6  | 6029917  | 7.32E-05 | 0.3796  | 299 | 0.130187237 | 0.044450463 |
| SNP_A.K_978286_6_1669137    | 6  | 1669137  | 7.33E-05 | 0.25585 | 299 | 0.130182023 | 0.044474677 |
| SNP_A.K_1002049_6_6538171   | 6  | 6538171  | 7.34E-05 | 0.30769 | 299 | 0.130177526 | 0.044493794 |
| SNP_A.K_277525_2_2949239    | 2  | 2949239  | 7.35E-05 | 0.07525 | 299 | 0.130165134 | 0.044569309 |
| SNP_A.K_757998_4_19215066   | 4  | 19215066 | 7.36E-05 | 0.00502 | 299 | 0.130159772 | 0.044594657 |
| SNP_A.K_978537_6_1719932    | 6  | 1719932  | 7.37E-05 | 0.26756 | 299 | 0.130145801 | 0.0446709   |
| SNP_A.K_278279_2_3049113    | 2  | 3049113  | 7.37E-05 | 0.07525 | 299 | 0.130145488 | 0.0446709   |
| SNP_A.K_995675_6_5947207    | 6  | 5947207  | 7.38E-05 | 0.37124 | 299 | 0.130141798 | 0.044680242 |
| SNP_A.K_1004280_6_6862136   | 6  | 6862136  | 7.38E-05 | 0.40134 | 299 | 0.130138985 | 0.044680242 |
| SNP_A.K_2079044_12_27050415 | 12 | 27050415 | 7.38E-05 | 0.05351 | 299 | 0.130138742 | 0.044680242 |
| SNP_A.K_524473_3_10507188   | 3  | 10507188 | 7.39E-05 | 0.00502 | 299 | 0.130132552 | 0.044711615 |
| SNP_A.K_990287_6_4704907    | 6  | 4704907  | 7.40E-05 | 0.16722 | 299 | 0.130124299 | 0.044737762 |
| SNP_A.K_1383185_8_9133665   | 8  | 9133665  | 7.40E-05 | 0.27926 | 299 | 0.130123471 | 0.044737762 |
| SNP_A.K_1383184_8_9133661   | 8  | 9133661  | 7.40E-05 | 0.27926 | 299 | 0.130123471 | 0.044737762 |
| SNP_A.K_978662_6_1751718    | 6  | 1751718  | 7.41E-05 | 0.29097 | 299 | 0.130119101 | 0.044756126 |
| SNP_A.K_673206_4_333457     | 4  | 333457   | 7.43E-05 | 0.15217 | 299 | 0.130100983 | 0.044854422 |

|                             |    |          |          |         |     |             |             |
|-----------------------------|----|----------|----------|---------|-----|-------------|-------------|
| SNP_A.K_375081_2_17933736   | 2  | 17933736 | 7.43E-05 | 0.04515 | 299 | 0.130100712 | 0.044854422 |
| SNP_A.K_196656_1_31473294   | 1  | 31473294 | 7.43E-05 | 0.31773 | 299 | 0.130099992 | 0.044854422 |
| SNP_A.K_2058944_12_23271722 | 12 | 23271722 | 7.44E-05 | 0.01839 | 299 | 0.130093671 | 0.044886895 |
| SNP_A.K_29303_1_4222831     | 1  | 4222831  | 7.45E-05 | 0.09699 | 299 | 0.130081594 | 0.044960886 |
| SNP_A.K_690127_4_4406786    | 4  | 4406786  | 7.46E-05 | 0.03679 | 299 | 0.130075756 | 0.044989959 |
| SNP_A.K_909063_5_17581001   | 5  | 17581001 | 7.48E-05 | 0.04013 | 299 | 0.130053457 | 0.045138063 |
| SNP_A.K_462837_2_34434580   | 2  | 34434580 | 7.49E-05 | 0.04849 | 299 | 0.130043969 | 0.045189625 |
| SNP_A.K_1383140_8_9131871   | 8  | 9131871  | 7.50E-05 | 0.27425 | 299 | 0.130042727 | 0.045189625 |
| SNP_A.K_978348_6_1680899    | 6  | 1680899  | 7.50E-05 | 0.35953 | 299 | 0.130037725 | 0.045203687 |
| SNP_A.K_218489_1_35296904   | 1  | 35296904 | 7.50E-05 | 0.16722 | 299 | 0.130037177 | 0.045203687 |
| SNP_A.K_710393_4_8339904    | 4  | 8339904  | 7.52E-05 | 0.07525 | 299 | 0.130026762 | 0.045266169 |
| SNP_A.K_307475_2_7409949    | 2  | 7409949  | 7.54E-05 | 0.25418 | 299 | 0.130003864 | 0.045419586 |
| SNP_A.K_307488_2_7412777    | 2  | 7412777  | 7.56E-05 | 0.25418 | 299 | 0.129986107 | 0.045535972 |
| SNP_A.K_990251_6_4703307    | 6  | 4703307  | 7.59E-05 | 0.17726 | 299 | 0.12996693  | 0.045663066 |
| SNP_A.K_1924859_11_24671201 | 11 | 24671201 | 7.59E-05 | 0.02007 | 299 | 0.129963707 | 0.045673477 |
| SNP_A.K_77577_1_10868646    | 1  | 10868646 | 7.61E-05 | 0.27759 | 299 | 0.129952603 | 0.045730933 |
| SNP_A.K_760918_4_19817420   | 4  | 19817420 | 7.61E-05 | 0.01672 | 299 | 0.129952268 | 0.045730933 |
| SNP_A.K_990347_6_4711819    | 6  | 4711819  | 7.61E-05 | 0.16221 | 299 | 0.129947189 | 0.045754997 |
| SNP_A.K_1602004_9_19102864  | 9  | 19102864 | 7.62E-05 | 0.12542 | 299 | 0.129941273 | 0.045785217 |
| SNP_A.K_752436_4_17906178   | 4  | 17906178 | 7.63E-05 | 0.06522 | 299 | 0.129932301 | 0.045822094 |
| SNP_A.K_709863_4_8299769    | 4  | 8299769  | 7.63E-05 | 0.07692 | 299 | 0.129931541 | 0.045822094 |
| SNP_A.K_709368_4_8259022    | 4  | 8259022  | 7.63E-05 | 0.09699 | 299 | 0.129930859 | 0.045822094 |
| SNP_A.K_709991_4_8304676    | 4  | 8304676  | 7.64E-05 | 0.09197 | 299 | 0.129923654 | 0.045861859 |
| SNP_A.K_885770_5_8585545    | 5  | 8585545  | 7.65E-05 | 0.03846 | 299 | 0.129919387 | 0.045880037 |
| SNP_A.K_978585_6_1733945    | 6  | 1733945  | 7.65E-05 | 0.27425 | 299 | 0.129914652 | 0.045901674 |
| SNP_A.K_690553_4_4450554    | 4  | 4450554  | 7.65E-05 | 0.04515 | 299 | 0.129912624 | 0.045903382 |
| SNP_A.K_673438_4_361780     | 4  | 361780   | 7.66E-05 | 0.1505  | 299 | 0.129905476 | 0.045920448 |
| SNP_A.K_201302_1_32161653   | 1  | 32161653 | 7.66E-05 | 0.43478 | 299 | 0.129904641 | 0.045920448 |
| SNP_A.K_1383155_8_9132243   | 8  | 9132243  | 7.67E-05 | 0.27425 | 299 | 0.129903412 | 0.045920448 |
| SNP_A.K_978810_6_1783455    | 6  | 1783455  | 7.67E-05 | 0.32274 | 299 | 0.129903128 | 0.045920448 |
| SNP_A.K_456210_2_32978883   | 2  | 32978883 | 7.68E-05 | 0.12542 | 299 | 0.12988964  | 0.046006691 |
| SNP_A.K_1534507_9_5994196   | 9  | 5994196  | 7.69E-05 | 0.09365 | 299 | 0.129883843 | 0.046036255 |
| SNP_A.K_2078523_12_26994309 | 12 | 26994309 | 7.70E-05 | 0.01839 | 299 | 0.129877093 | 0.046072889 |
| SNP_A.K_2079977_12_27187455 | 12 | 27187455 | 7.70E-05 | 0.02508 | 299 | 0.129873466 | 0.046079924 |
| SNP_A.K_710332_4_8336677    | 4  | 8336677  | 7.70E-05 | 0.07692 | 299 | 0.129872559 | 0.046079924 |
| SNP_A.K_1017829_6_8736472   | 6  | 8736472  | 7.71E-05 | 0.03177 | 299 | 0.129865746 | 0.04611707  |
| SNP_A.K_673135_4_322170     | 4  | 322170   | 7.72E-05 | 0.14883 | 299 | 0.129862763 | 0.046125896 |
| SNP_A.K_978272_6_1666603    | 6  | 1666603  | 7.72E-05 | 0.27926 | 299 | 0.129855807 | 0.04616415  |
| SNP_A.K_977889_6_1612775    | 6  | 1612775  | 7.73E-05 | 0.18562 | 299 | 0.129852927 | 0.046172235 |
| SNP_A.K_1534458_9_5987012   | 9  | 5987012  | 7.73E-05 | 0.13043 | 299 | 0.129848238 | 0.046193123 |
| SNP_A.K_978085_6_1646532    | 6  | 1646532  | 7.74E-05 | 0.1806  | 299 | 0.129846531 | 0.046193123 |
| SNP_A.K_498011_3_5645820    | 3  | 5645820  | 7.74E-05 | 0.03846 | 299 | 0.129842321 | 0.046197837 |
| SNP_A.K_498438_3_5706397    | 3  | 5706397  | 7.74E-05 | 0.03846 | 299 | 0.129842321 | 0.046197837 |
| SNP_A.K_1001478_6_6483168   | 6  | 6483168  | 7.75E-05 | 0.2893  | 299 | 0.129835881 | 0.046232342 |
| SNP_A.K_1001230_6_6456577   | 6  | 6456577  | 7.76E-05 | 0.37625 | 299 | 0.129825588 | 0.046295494 |
| SNP_A.K_710047_4_8312669    | 4  | 8312669  | 7.77E-05 | 0.07525 | 299 | 0.129821729 | 0.046301869 |
| SNP_A.K_996188_6_5973569    | 6  | 5973569  | 7.77E-05 | 0.47659 | 299 | 0.12982116  | 0.046301869 |
| SNP_A.K_1001455_6_6482052   | 6  | 6482052  | 7.78E-05 | 0.29264 | 299 | 0.129809836 | 0.046360021 |
| SNP_A.K_374899_2_17914649   | 2  | 17914649 | 7.78E-05 | 0.04181 | 299 | 0.12980977  | 0.046360021 |
| SNP_A.K_992578_6_5659599    | 6  | 5659599  | 7.79E-05 | 0.49498 | 299 | 0.129805493 | 0.046378576 |

|                             |    |          |          |         |     |             |             |
|-----------------------------|----|----------|----------|---------|-----|-------------|-------------|
| SNP_A.K_306939_2_7369641    | 2  | 7369641  | 7.79E-05 | 0.24247 | 299 | 0.129801915 | 0.046391944 |
| SNP_A.K_307423_2_7403730    | 2  | 7403730  | 7.80E-05 | 0.43478 | 299 | 0.129798966 | 0.04640063  |
| SNP_A.K_990281_6_4704450    | 6  | 4704450  | 7.80E-05 | 0.18729 | 299 | 0.129793242 | 0.046429994 |
| SNP_A.K_1830837_11_10584295 | 11 | 10584295 | 7.82E-05 | 0.40301 | 299 | 0.129778557 | 0.046516129 |
| SNP_A.K_978398_6_1686655    | 6  | 1686655  | 7.82E-05 | 0.25251 | 299 | 0.129777978 | 0.046516129 |
| SNP_A.K_995644_6_5946130    | 6  | 5946130  | 7.83E-05 | 0.38127 | 299 | 0.129775183 | 0.046516129 |
| SNP_A.K_1382903_8_9121485   | 8  | 9121485  | 7.83E-05 | 0.27759 | 299 | 0.129774113 | 0.046516129 |
| SNP_A.K_994839_6_5893953    | 6  | 5893953  | 7.83E-05 | 0.31271 | 299 | 0.129772791 | 0.046516129 |
| SNP_A.K_1005039_6_6964303   | 6  | 6964303  | 7.83E-05 | 0.41304 | 299 | 0.129769668 | 0.046526166 |
| SNP_A.K_709639_4_8278928    | 4  | 8278928  | 7.85E-05 | 0.09699 | 299 | 0.129757149 | 0.046606436 |
| SNP_A.K_607341_3_25613137   | 3  | 25613137 | 7.85E-05 | 0.08528 | 299 | 0.129754904 | 0.046609936 |
| SNP_A.K_1383008_8_9127083   | 8  | 9127083  | 7.85E-05 | 0.27926 | 299 | 0.129752382 | 0.046615508 |
| SNP_A.K_1382832_8_9118497   | 8  | 9118497  | 7.86E-05 | 0.27759 | 299 | 0.129750029 | 0.046619825 |
| SNP_A.K_374698_2_17874706   | 2  | 17874706 | 7.87E-05 | 0.04181 | 299 | 0.129737334 | 0.046701591 |
| SNP_A.K_194469_1_30876557   | 1  | 30876557 | 7.88E-05 | 0.38127 | 299 | 0.129729866 | 0.046744276 |
| SNP_A.K_710528_4_8426482    | 4  | 8426482  | 7.89E-05 | 0.0786  | 299 | 0.12972534  | 0.046764922 |
| SNP_A.K_710125_4_8317518    | 4  | 8317518  | 7.90E-05 | 0.08194 | 299 | 0.12971227  | 0.046836445 |
| SNP_A.K_307490_2_7412869    | 2  | 7412869  | 7.91E-05 | 0.25084 | 299 | 0.129711243 | 0.046836445 |
| SNP_A.K_1608481_9_20762678  | 9  | 20762678 | 7.91E-05 | 0.29766 | 299 | 0.129708929 | 0.046836445 |
| SNP_A.K_374680_2_17871556   | 2  | 17871556 | 7.91E-05 | 0.04348 | 299 | 0.129708694 | 0.046836445 |
| SNP_A.K_709583_4_8274808    | 4  | 8274808  | 7.91E-05 | 0.08696 | 299 | 0.129706951 | 0.046836445 |
| SNP_A.K_83728_1_11508046    | 1  | 11508046 | 7.92E-05 | 0.19064 | 299 | 0.129702614 | 0.046855738 |
| SNP_A.K_201192_1_32147880   | 1  | 32147880 | 7.92E-05 | 0.18395 | 299 | 0.129700001 | 0.046862069 |
| SNP_A.K_1005259_6_7000081   | 6  | 7000081  | 7.93E-05 | 0.29264 | 299 | 0.1296893   | 0.046922132 |
| SNP_A.K_991323_6_4929340    | 6  | 4929340  | 7.93E-05 | 0.03512 | 299 | 0.129688479 | 0.046922132 |
| SNP_A.K_992591_6_5660018    | 6  | 5660018  | 7.94E-05 | 0.49498 | 299 | 0.129683551 | 0.046932599 |
| SNP_A.K_992592_6_5660023    | 6  | 5660023  | 7.94E-05 | 0.49498 | 299 | 0.129683551 | 0.046932599 |
| SNP_A.K_306783_2_7350081    | 2  | 7350081  | 7.95E-05 | 0.2709  | 299 | 0.129678918 | 0.046954183 |
| SNP_A.K_900709_5_16208228   | 5  | 16208228 | 7.95E-05 | 0.04348 | 299 | 0.129675951 | 0.046963217 |
| SNP_A.K_1001341_6_6466246   | 6  | 6466246  | 7.96E-05 | 0.28595 | 299 | 0.129672422 | 0.046976499 |
| SNP_A.K_978475_6_1699335    | 6  | 1699335  | 7.96E-05 | 0.26421 | 299 | 0.129669375 | 0.046986152 |
| SNP_A.K_307247_2_7387909    | 2  | 7387909  | 7.97E-05 | 0.2893  | 299 | 0.129660423 | 0.047028037 |
| SNP_A.K_308425_2_7512172    | 2  | 7512172  | 7.97E-05 | 0.42977 | 299 | 0.129659406 | 0.047028037 |
| SNP_A.K_1001214_6_6455275   | 6  | 6455275  | 7.97E-05 | 0.29264 | 299 | 0.129658525 | 0.047028037 |
| SNP_A.K_77851_1_10901266    | 1  | 10901266 | 7.99E-05 | 0.2893  | 299 | 0.129647411 | 0.047098663 |
| SNP_A.K_996674_6_6016494    | 6  | 6016494  | 8.00E-05 | 0.48328 | 299 | 0.129639367 | 0.047146167 |
| SNP_A.K_1004140_6_6836824   | 6  | 6836824  | 8.00E-05 | 0.35786 | 299 | 0.129637025 | 0.047148495 |
| SNP_A.K_963595_5_28294113   | 5  | 28294113 | 8.01E-05 | 0.01338 | 299 | 0.129632809 | 0.047148495 |
| SNP_A.K_1001628_6_6499457   | 6  | 6499457  | 8.01E-05 | 0.32609 | 299 | 0.129631185 | 0.047148495 |
| SNP_A.K_1382854_8_9119512   | 8  | 9119512  | 8.01E-05 | 0.27258 | 299 | 0.129630514 | 0.047148495 |
| SNP_A.K_1382970_8_9125489   | 8  | 9125489  | 8.01E-05 | 0.14214 | 299 | 0.129630244 | 0.047148495 |
| SNP_A.K_1382695_8_9113466   | 8  | 9113466  | 8.02E-05 | 0.27926 | 299 | 0.129619927 | 0.047213297 |
| SNP_A.K_308452_2_7517022    | 2  | 7517022  | 8.04E-05 | 0.18896 | 299 | 0.129603344 | 0.047325769 |
| SNP_A.K_307470_2_7409427    | 2  | 7409427  | 8.05E-05 | 0.2709  | 299 | 0.129600486 | 0.047334111 |
| SNP_A.K_306917_2_7366603    | 2  | 7366603  | 8.05E-05 | 0.27258 | 299 | 0.12959809  | 0.047338942 |
| SNP_A.K_8623_1_1623800      | 1  | 1623800  | 8.05E-05 | 0.08194 | 299 | 0.129596162 | 0.047340223 |
| SNP_A.K_1293946_7_23121204  | 7  | 23121204 | 8.06E-05 | 0.03512 | 299 | 0.129592627 | 0.047353729 |
| SNP_A.K_978776_6_1780088    | 6  | 1780088  | 8.07E-05 | 0.30268 | 299 | 0.129580886 | 0.04742916  |
| SNP_A.K_708666_4_8072070    | 4  | 8072070  | 8.08E-05 | 0.09365 | 299 | 0.129579196 | 0.04742916  |
| SNP_A.K_1925579_11_24746935 | 11 | 24746935 | 8.08E-05 | 0.03512 | 299 | 0.129576243 | 0.04743096  |

|                             |    |          |          |         |     |             |             |
|-----------------------------|----|----------|----------|---------|-----|-------------|-------------|
| SNP_A.K_307151_2_7382007    | 2  | 7382007  | 8.08E-05 | 0.39967 | 299 | 0.129573532 | 0.04743096  |
| SNP_A.K_1000480_6_6388682   | 6  | 6388682  | 8.08E-05 | 0.25418 | 299 | 0.129572854 | 0.04743096  |
| SNP_A.K_312022_2_7899217    | 2  | 7899217  | 8.09E-05 | 0.26589 | 299 | 0.129569568 | 0.04743096  |
| SNP_A.K_1383163_8_9132629   | 8  | 9132629  | 8.09E-05 | 0.28261 | 299 | 0.129567423 | 0.04743096  |
| SNP_A.K_992573_6_5659517    | 6  | 5659517  | 8.09E-05 | 0.49331 | 299 | 0.129565347 | 0.04743096  |
| SNP_A.K_978006_6_1635119    | 6  | 1635119  | 8.10E-05 | 0.26756 | 299 | 0.129562682 | 0.04743096  |
| SNP_A.K_1382763_8_9116039   | 8  | 9116039  | 8.10E-05 | 0.27425 | 299 | 0.129560315 | 0.04743096  |
| SNP_A.K_710535_4_8426696    | 4  | 8426696  | 8.10E-05 | 0.08027 | 299 | 0.129558593 | 0.04743096  |
| SNP_A.K_1433100_8_16617641  | 8  | 16617641 | 8.10E-05 | 0.0903  | 299 | 0.129558131 | 0.04743096  |
| SNP_A.K_218895_1_35379698   | 1  | 35379698 | 8.11E-05 | 0.15385 | 299 | 0.129552819 | 0.04743096  |
| SNP_A.K_482888_3_3103485    | 3  | 3103485  | 8.11E-05 | 0.00502 | 299 | 0.129552122 | 0.04743096  |
| SNP_A.K_1389807_8_10127899  | 8  | 10127899 | 8.11E-05 | 0.04013 | 299 | 0.129551714 | 0.04743096  |
| SNP_A.K_1001203_6_6454957   | 6  | 6454957  | 8.11E-05 | 0.32107 | 299 | 0.129548689 | 0.04743096  |
| SNP_A.K_978558_6_1724409    | 6  | 1724409  | 8.12E-05 | 0.26087 | 299 | 0.129547463 | 0.04743096  |
| SNP_A.K_868704_5_4771673    | 5  | 4771673  | 8.12E-05 | 0.16722 | 299 | 0.129546712 | 0.04743096  |
| SNP_A.K_1830868_11_10585599 | 11 | 10585599 | 8.12E-05 | 0.21405 | 299 | 0.129546091 | 0.04743096  |
| SNP_A.K_307198_2_7384350    | 2  | 7384350  | 8.12E-05 | 0.40134 | 299 | 0.129544482 | 0.04743096  |
| SNP_A.K_1018131_6_8840415   | 6  | 8840415  | 8.12E-05 | 0.07692 | 299 | 0.1295443   | 0.04743096  |
| SNP_A.K_1389914_8_10135405  | 8  | 10135405 | 8.12E-05 | 0.06187 | 299 | 0.129543908 | 0.04743096  |
| SNP_A.K_1349626_8_3725597   | 8  | 3725597  | 8.12E-05 | 0.02174 | 299 | 0.129542145 | 0.047431084 |
| SNP_A.K_1001244_6_6457890   | 6  | 6457890  | 8.13E-05 | 0.29097 | 299 | 0.129537738 | 0.047451343 |
| SNP_A.K_1004408_6_6880002   | 6  | 6880002  | 8.14E-05 | 0.47492 | 299 | 0.129532536 | 0.047477681 |
| SNP_A.K_1383102_8_9130726   | 8  | 9130726  | 8.15E-05 | 0.27425 | 299 | 0.129522277 | 0.047542622 |
| SNP_A.K_421707_2_24819079   | 2  | 24819079 | 8.17E-05 | 0.02843 | 299 | 0.129505881 | 0.047654586 |
| SNP_A.K_710093_4_8315772    | 4  | 8315772  | 8.18E-05 | 0.11037 | 299 | 0.129500785 | 0.047680236 |
| SNP_A.K_863270_5_3670844    | 5  | 3670844  | 8.18E-05 | 0.06522 | 299 | 0.129498088 | 0.04768753  |
| SNP_A.K_1804588_11_7090062  | 11 | 7090062  | 8.21E-05 | 0.02508 | 299 | 0.12947793  | 0.047828749 |
| SNP_A.K_1001519_6_6486695   | 6  | 6486695  | 8.23E-05 | 0.301   | 299 | 0.129463023 | 0.047929957 |
| SNP_A.K_993250_6_5724272    | 6  | 5724272  | 8.27E-05 | 0.2291  | 299 | 0.129428338 | 0.048180573 |
| SNP_A.K_1391374_8_10301324  | 8  | 10301324 | 8.28E-05 | 0.05017 | 299 | 0.129423507 | 0.048180573 |
| SNP_A.K_978417_6_1689309    | 6  | 1689309  | 8.28E-05 | 0.26756 | 299 | 0.129421261 | 0.048180573 |
| SNP_A.K_1600889_9_18860007  | 9  | 18860007 | 8.28E-05 | 0.13712 | 299 | 0.129420052 | 0.048180573 |
| SNP_A.K_1261351_7_17339078  | 7  | 17339078 | 8.28E-05 | 0.01839 | 299 | 0.129419592 | 0.048180573 |
| SNP_A.K_1000761_6_6415497   | 6  | 6415497  | 8.29E-05 | 0.34783 | 299 | 0.12941874  | 0.048180573 |
| SNP_A.K_308603_2_7528963    | 2  | 7528963  | 8.29E-05 | 0.25084 | 299 | 0.129418359 | 0.048180573 |
| SNP_A.K_1726517_10_16594449 | 10 | 16594449 | 8.29E-05 | 0.06187 | 299 | 0.129414466 | 0.048194557 |
| SNP_A.K_710394_4_8339949    | 4  | 8339949  | 8.29E-05 | 0.07692 | 299 | 0.129413075 | 0.048194557 |
| SNP_A.K_308604_2_7528965    | 2  | 7528965  | 8.30E-05 | 0.22074 | 299 | 0.12940637  | 0.048233011 |
| SNP_A.K_1001540_6_6488536   | 6  | 6488536  | 8.31E-05 | 0.32274 | 299 | 0.129403802 | 0.048239447 |
| SNP_A.K_709867_4_8299910    | 4  | 8299910  | 8.31E-05 | 0.08194 | 299 | 0.129398207 | 0.048269344 |
| SNP_A.K_1001732_6_6511710   | 6  | 6511710  | 8.33E-05 | 0.31271 | 299 | 0.129384052 | 0.048365711 |
| SNP_A.K_995672_6_5946897    | 6  | 5946897  | 8.34E-05 | 0.47826 | 299 | 0.129382051 | 0.048367766 |
| SNP_A.K_992005_6_5607999    | 6  | 5607999  | 8.34E-05 | 0.27759 | 299 | 0.129377809 | 0.048387244 |
| SNP_A.K_20616_1_3100204     | 1  | 3100204  | 8.35E-05 | 0.00502 | 299 | 0.129372491 | 0.048415098 |
| SNP_A.K_1608494_9_20763771  | 9  | 20763771 | 8.35E-05 | 0.30769 | 299 | 0.129370487 | 0.048417188 |
| SNP_A.K_977989_6_1631020    | 6  | 1631020  | 8.35E-05 | 0.19565 | 299 | 0.129367668 | 0.048425631 |
| SNP_A.K_1001715_6_6508592   | 6  | 6508592  | 8.36E-05 | 0.31104 | 299 | 0.129361599 | 0.048459358 |
| SNP_A.K_1831031_11_10596750 | 11 | 10596750 | 8.38E-05 | 0.41973 | 299 | 0.129350795 | 0.048530017 |
| SNP_A.K_308024_2_7462905    | 2  | 7462905  | 8.41E-05 | 0.45652 | 299 | 0.129323452 | 0.048730058 |
| SNP_A.K_1001708_6_6507860   | 6  | 6507860  | 8.42E-05 | 0.30268 | 299 | 0.129317815 | 0.048752289 |



|                             |    |          |          |         |     |             |             |
|-----------------------------|----|----------|----------|---------|-----|-------------|-------------|
| SNP_A.K_1001747_6_6514498   | 6  | 6514498  | 8.42E-05 | 0.31104 | 299 | 0.129317149 | 0.048752289 |
| SNP_A.K_218819_1_35367739   | 1  | 35367739 | 8.43E-05 | 0.1689  | 299 | 0.12931257  | 0.048774596 |
| SNP_A.K_978342_6_1679898    | 6  | 1679898  | 8.43E-05 | 0.25585 | 299 | 0.129309895 | 0.048781998 |
| SNP_A.K_326689_2_10039219   | 2  | 10039219 | 8.45E-05 | 0.09197 | 299 | 0.129296294 | 0.048875105 |
| SNP_A.K_1004699_6_6919601   | 6  | 6919601  | 8.46E-05 | 0.28094 | 299 | 0.129291161 | 0.048901838 |
| SNP_A.K_996813_6_6027424    | 6  | 6027424  | 8.48E-05 | 0.46488 | 299 | 0.129278169 | 0.048990394 |
| SNP_A.K_992548_6_5655951    | 6  | 5655951  | 8.48E-05 | 0.19398 | 299 | 0.129274666 | 0.049004359 |
| SNP_A.K_1382754_8_9115710   | 8  | 9115710  | 8.49E-05 | 0.27258 | 299 | 0.129268153 | 0.04904204  |
| SNP_A.K_1364912_8_6055399   | 8  | 6055399  | 8.49E-05 | 0.05518 | 299 | 0.12926526  | 0.049045288 |
| SNP_A.K_998860_6_6229196    | 6  | 6229196  | 8.49E-05 | 0.26756 | 299 | 0.129264287 | 0.049045288 |
| SNP_A.K_1608336_9_20721637  | 9  | 20721637 | 8.51E-05 | 0.28261 | 299 | 0.129249772 | 0.049129272 |
| SNP_A.K_978344_6_1679907    | 6  | 1679907  | 8.52E-05 | 0.26087 | 299 | 0.129248948 | 0.049129272 |
| SNP_A.K_478916_3_2117334    | 3  | 2117334  | 8.52E-05 | 0.21237 | 299 | 0.129248459 | 0.049129272 |
| SNP_A.K_978928_6_1807960    | 6  | 1807960  | 8.52E-05 | 0.47157 | 299 | 0.129243636 | 0.049153727 |
| SNP_A.K_1383104_8_9130735   | 8  | 9130735  | 8.53E-05 | 0.27759 | 299 | 0.129238855 | 0.049156823 |
| SNP_A.K_1323468_7_29126048  | 7  | 29126048 | 8.53E-05 | 0.03846 | 299 | 0.129238447 | 0.049156823 |
| SNP_A.K_1004980_6_6959612   | 6  | 6959612  | 8.53E-05 | 0.33445 | 299 | 0.129238072 | 0.049156823 |
| SNP_A.K_1001941_6_6531338   | 6  | 6531338  | 8.53E-05 | 0.3194  | 299 | 0.129235091 | 0.049166755 |
| SNP_A.K_1382684_8_9113252   | 8  | 9113252  | 8.54E-05 | 0.28261 | 299 | 0.129231879 | 0.049177968 |
| SNP_A.K_709663_4_8279629    | 4  | 8279629  | 8.54E-05 | 0.08863 | 299 | 0.129230227 | 0.049177968 |
| SNP_A.K_1001571_6_6492428   | 6  | 6492428  | 8.55E-05 | 0.2893  | 299 | 0.129226907 | 0.049190602 |
| SNP_A.K_992594_6_5660145    | 6  | 5660145  | 8.56E-05 | 0.49164 | 299 | 0.129219433 | 0.049236088 |
| SNP_A.K_198704_1_31778131   | 1  | 31778131 | 8.57E-05 | 0.35619 | 299 | 0.129208413 | 0.049309704 |
| SNP_A.K_308668_2_7534932    | 2  | 7534932  | 8.57E-05 | 0.18896 | 299 | 0.129206247 | 0.049310257 |
| SNP_A.K_992021_6_5613140    | 6  | 5613140  | 8.58E-05 | 0.23913 | 299 | 0.129204903 | 0.049310257 |
| SNP_A.K_307901_2_7453477    | 2  | 7453477  | 8.58E-05 | 0.45987 | 299 | 0.129202993 | 0.049311774 |
| SNP_A.K_1001655_6_6501015   | 6  | 6501015  | 8.58E-05 | 0.44816 | 299 | 0.129199511 | 0.049318572 |
| SNP_A.K_993116_6_5708781    | 6  | 5708781  | 8.58E-05 | 0.11204 | 299 | 0.129198698 | 0.049318572 |
| SNP_A.K_580686_3_21128225   | 3  | 21128225 | 8.59E-05 | 0.48328 | 299 | 0.129191073 | 0.049342827 |
| SNP_A.K_513806_3_8342538    | 3  | 8342538  | 8.60E-05 | 0.02508 | 299 | 0.129188973 | 0.049342827 |
| SNP_A.K_218773_1_35348651   | 1  | 35348651 | 8.60E-05 | 0.15552 | 299 | 0.129186192 | 0.049342827 |
| SNP_A.K_278112_2_3027686    | 2  | 3027686  | 8.60E-05 | 0.0903  | 299 | 0.129185766 | 0.049342827 |
| SNP_A.K_995240_6_5921101    | 6  | 5921101  | 8.60E-05 | 0.2408  | 299 | 0.12918544  | 0.049342827 |
| SNP_A.K_758817_4_19402229   | 4  | 19402229 | 8.60E-05 | 0.00502 | 299 | 0.129185339 | 0.049342827 |
| SNP_A.K_1816215_11_9006025  | 11 | 9006025  | 8.61E-05 | 0.39967 | 299 | 0.12917965  | 0.049364271 |
| SNP_A.K_1924519_11_24649992 | 11 | 24649992 | 8.61E-05 | 0.02341 | 299 | 0.129179205 | 0.049364271 |
| SNP_A.K_1019147_6_9008417   | 6  | 9008417  | 8.62E-05 | 0.10201 | 299 | 0.129172361 | 0.049404983 |
| SNP_A.K_218471_1_35269885   | 1  | 35269885 | 8.63E-05 | 0.15886 | 299 | 0.129168786 | 0.049419758 |
| SNP_A.K_1001541_6_6488561   | 6  | 6488561  | 8.64E-05 | 0.31773 | 299 | 0.129158056 | 0.049491418 |
| SNP_A.K_1004998_6_6961047   | 6  | 6961047  | 8.65E-05 | 0.3194  | 299 | 0.129150103 | 0.049541065 |
| SNP_A.K_977972_6_1627112    | 6  | 1627112  | 8.66E-05 | 0.2709  | 299 | 0.129143514 | 0.049579908 |
| SNP_A.K_1608679_9_20815871  | 9  | 20815871 | 8.69E-05 | 0.30435 | 299 | 0.129125416 | 0.049703386 |
| SNP_A.K_1001360_6_6466803   | 6  | 6466803  | 8.69E-05 | 0.2893  | 299 | 0.129124612 | 0.049703386 |
| SNP_A.K_710543_4_8426850    | 4  | 8426850  | 8.70E-05 | 0.0786  | 299 | 0.129117971 | 0.049731111 |
| SNP_A.K_1726512_10_16593653 | 10 | 16593653 | 8.70E-05 | 0.0602  | 299 | 0.129117721 | 0.049731111 |
| SNP_A.K_1162924_6_30904814  | 6  | 30904814 | 8.70E-05 | 0.03512 | 299 | 0.129113633 | 0.049739833 |
| SNP_A.K_1001742_6_6512543   | 6  | 6512543  | 8.70E-05 | 0.31271 | 299 | 0.129113212 | 0.049739833 |
| SNP_A.K_995532_6_5940401    | 6  | 5940401  | 8.72E-05 | 0.46656 | 299 | 0.129099563 | 0.049835362 |
| SNP_A.K_1803420_11_6912569  | 11 | 6912569  | 8.73E-05 | 0.01171 | 299 | 0.129093116 | 0.049873333 |
| SNP_A.K_995726_6_5948984    | 6  | 5948984  | 8.74E-05 | 0.49498 | 299 | 0.129090217 | 0.049875624 |

|                            |   |          |          |         |     |             |             |
|----------------------------|---|----------|----------|---------|-----|-------------|-------------|
| SNP_A.K_1019295_6_9032330  | 6 | 9032330  | 8.74E-05 | 0.03512 | 299 | 0.129086003 | 0.049875624 |
| SNP_A.K_1019353_6_9043307  | 6 | 9043307  | 8.74E-05 | 0.03512 | 299 | 0.129086003 | 0.049875624 |
| SNP_A.K_1021064_6_9317440  | 6 | 9317440  | 8.74E-05 | 0.03512 | 299 | 0.129086003 | 0.049875624 |
| SNP_A.K_1383168_8_9133136  | 8 | 9133136  | 8.75E-05 | 0.10702 | 299 | 0.129077102 | 0.049921295 |
| SNP_A.K_218582_1_35319214  | 1 | 35319214 | 8.75E-05 | 0.29933 | 299 | 0.129076897 | 0.049921295 |
| SNP_A.K_1433105_8_16617724 | 8 | 16617724 | 8.77E-05 | 0.10535 | 299 | 0.129068738 | 0.049973107 |

### Grain\_length

| SNP                       | Chrc | Position | P.value  | maf     | nobs | Rsquare.of.Model.w | FDR_Adjusted_P-values |
|---------------------------|------|----------|----------|---------|------|--------------------|-----------------------|
| SNP_A.K_553163_3_16733441 | 3    | 16733441 | 7.16E-10 | 0.24688 | 320  | 0.322481071        | 0.001491214           |
| SNP_A.K_553157_3_16692213 | 3    | 16692213 | 3.44E-08 | 0.04219 | 320  | 0.30180039         | 0.035789542           |
| SNP_A.K_553158_3_16696473 | 3    | 16696473 | 5.27E-08 | 0.04063 | 320  | 0.299555021        | 0.036583814           |

### Grain\_width

| SNP                      | Chrc | Position | P.value  | maf     | nobs | Rsquare.of.Model.w | FDR_Adjusted_P-values |
|--------------------------|------|----------|----------|---------|------|--------------------|-----------------------|
| SNP_A.K_871244_5_5371949 | 5    | 5371949  | 3.23E-10 | 0.46719 | 320  | 0.342419716        | 0.000288826           |
| SNP_A.K_871245_5_5371952 | 5    | 5371952  | 4.06E-10 | 0.47188 | 320  | 0.34120786         | 0.000288826           |
| SNP_A.K_871237_5_5371529 | 5    | 5371529  | 5.14E-10 | 0.46719 | 320  | 0.339950934        | 0.000288826           |
| SNP_A.K_871243_5_5371916 | 5    | 5371916  | 5.86E-10 | 0.46406 | 320  | 0.339257308        | 0.000288826           |
| SNP_A.K_871272_5_5373841 | 5    | 5373841  | 6.94E-10 | 0.4625  | 320  | 0.338365666        | 0.000288826           |
| SNP_A.K_871258_5_5373422 | 5    | 5373422  | 2.21E-09 | 0.49844 | 320  | 0.332248326        | 0.00063476            |
| SNP_A.K_871239_5_5371686 | 5    | 5371686  | 2.28E-09 | 0.47813 | 320  | 0.332096651        | 0.00063476            |
| SNP_A.K_871241_5_5371716 | 5    | 5371716  | 2.44E-09 | 0.47813 | 320  | 0.331737021        | 0.00063476            |
| SNP_A.K_871238_5_5371609 | 5    | 5371609  | 3.31E-09 | 0.47188 | 320  | 0.330138572        | 0.000765454           |
| SNP_A.K_871242_5_5371772 | 5    | 5371772  | 3.72E-09 | 0.48125 | 320  | 0.329532069        | 0.000773574           |
| SNP_A.K_871265_5_5373560 | 5    | 5373560  | 5.93E-09 | 0.48281 | 320  | 0.327091098        | 0.000985037           |
| SNP_A.K_871147_5_5361894 | 5    | 5361894  | 6.08E-09 | 0.37969 | 320  | 0.326962577        | 0.000985037           |
| SNP_A.K_871141_5_5361276 | 5    | 5361276  | 6.15E-09 | 0.38594 | 320  | 0.32690106         | 0.000985037           |
| SNP_A.K_871277_5_5374961 | 5    | 5374961  | 9.81E-09 | 0.44219 | 320  | 0.324471703        | 0.001459283           |
| SNP_A.K_871294_5_5376138 | 5    | 5376138  | 1.11E-08 | 0.43594 | 320  | 0.323810771        | 0.001538233           |
| SNP_A.K_871114_5_5359520 | 5    | 5359520  | 1.18E-08 | 0.36406 | 320  | 0.323505686        | 0.001538233           |
| SNP_A.K_871116_5_5359681 | 5    | 5359681  | 1.37E-08 | 0.36875 | 320  | 0.322732282        | 0.001596788           |
| SNP_A.K_871115_5_5359598 | 5    | 5359598  | 1.38E-08 | 0.36406 | 320  | 0.322701957        | 0.001596788           |
| SNP_A.K_871283_5_5375201 | 5    | 5375201  | 1.64E-08 | 0.44531 | 320  | 0.321803555        | 0.001799603           |
| SNP_A.K_871260_5_5373491 | 5    | 5373491  | 1.75E-08 | 0.475   | 320  | 0.321490408        | 0.001816393           |
| SNP_A.K_871103_5_5358972 | 5    | 5358972  | 2.33E-08 | 0.37188 | 320  | 0.319996347        | 0.002310564           |
| SNP_A.K_871289_5_5375786 | 5    | 5375786  | 2.79E-08 | 0.43906 | 320  | 0.319068785        | 0.002640564           |
| SNP_A.K_871290_5_5375793 | 5    | 5375793  | 3.69E-08 | 0.44375 | 320  | 0.317634758        | 0.003337973           |
| SNP_A.K_871102_5_5358870 | 5    | 5358870  | 4.32E-08 | 0.38125 | 320  | 0.316825473        | 0.003704623           |
| SNP_A.K_871280_5_5375138 | 5    | 5375138  | 4.69E-08 | 0.44844 | 320  | 0.316400072        | 0.003704623           |
| SNP_A.K_871108_5_5359246 | 5    | 5359246  | 4.70E-08 | 0.36406 | 320  | 0.316390994        | 0.003704623           |
| SNP_A.K_871288_5_5375764 | 5    | 5375764  | 4.81E-08 | 0.44063 | 320  | 0.316277037        | 0.003704623           |
| SNP_A.K_871311_5_5377198 | 5    | 5377198  | 5.30E-08 | 0.40781 | 320  | 0.315771451        | 0.003942734           |
| SNP_A.K_871234_5_5371042 | 5    | 5371042  | 6.01E-08 | 0.37344 | 320  | 0.315131249        | 0.004185944           |
| SNP_A.K_871255_5_5373133 | 5    | 5373133  | 6.03E-08 | 0.49375 | 320  | 0.315111761        | 0.004185944           |
| SNP_A.K_871282_5_5375167 | 5    | 5375167  | 6.97E-08 | 0.44844 | 320  | 0.314372658        | 0.004570922           |
| SNP_A.K_871281_5_5375144 | 5    | 5375144  | 7.03E-08 | 0.44844 | 320  | 0.314331773        | 0.004570922           |
| SNP_A.K_871322_5_5378228 | 5    | 5378228  | 7.26E-08 | 0.43438 | 320  | 0.314161628        | 0.004582475           |
| SNP_A.K_871270_5_5373750 | 5    | 5373750  | 8.94E-08 | 0.5     | 320  | 0.313102073        | 0.005473591           |
| SNP_A.K_871292_5_5375922 | 5    | 5375922  | 1.02E-07 | 0.45    | 320  | 0.312448851        | 0.006044074           |
| SNP_A.K_871297_5_5376161 | 5    | 5376161  | 1.09E-07 | 0.43125 | 320  | 0.31208433         | 0.006312096           |

|                            |   |          |          |         |     |             |             |
|----------------------------|---|----------|----------|---------|-----|-------------|-------------|
| SNP_A.K_871171_5_5363611   | 5 | 5363611  | 1.37E-07 | 0.39531 | 320 | 0.31092526  | 0.007712874 |
| SNP_A.K_871098_5_5358629   | 5 | 5358629  | 1.69E-07 | 0.36719 | 320 | 0.309869016 | 0.00888159  |
| SNP_A.K_871216_5_5369802   | 5 | 5369802  | 1.72E-07 | 0.38281 | 320 | 0.309764431 | 0.00888159  |
| SNP_A.K_871268_5_5373724   | 5 | 5373724  | 1.72E-07 | 0.48438 | 320 | 0.309760641 | 0.00888159  |
| SNP_A.K_871210_5_5369555   | 5 | 5369555  | 1.77E-07 | 0.39688 | 320 | 0.309627763 | 0.00888159  |
| SNP_A.K_871257_5_5373379   | 5 | 5373379  | 1.79E-07 | 0.49688 | 320 | 0.309565388 | 0.00888159  |
| SNP_A.K_871274_5_5374196   | 5 | 5374196  | 2.02E-07 | 0.46875 | 320 | 0.308955855 | 0.009783517 |
| SNP_A.K_871227_5_5370747   | 5 | 5370747  | 2.08E-07 | 0.36406 | 320 | 0.308818888 | 0.009823202 |
| SNP_A.K_871195_5_5368150   | 5 | 5368150  | 2.14E-07 | 0.38594 | 320 | 0.308663786 | 0.009903608 |
| SNP_A.K_871286_5_5375574   | 5 | 5375574  | 2.66E-07 | 0.46406 | 320 | 0.307560011 | 0.012050304 |
| SNP_A.K_871181_5_5364561   | 5 | 5364561  | 2.75E-07 | 0.36563 | 320 | 0.307392322 | 0.012191805 |
| SNP_A.K_871313_5_5377607   | 5 | 5377607  | 2.91E-07 | 0.40469 | 320 | 0.307118884 | 0.012498799 |
| SNP_A.K_871326_5_5378446   | 5 | 5378446  | 2.94E-07 | 0.42344 | 320 | 0.307056173 | 0.012498799 |
| SNP_A.K_871273_5_5374168   | 5 | 5374168  | 3.03E-07 | 0.475   | 320 | 0.306912815 | 0.012601544 |
| SNP_A.K_871205_5_5369111   | 5 | 5369111  | 3.11E-07 | 0.39375 | 320 | 0.30676938  | 0.012710497 |
| SNP_A.K_871276_5_5374221   | 5 | 5374221  | 3.20E-07 | 0.46563 | 320 | 0.306637608 | 0.012795808 |
| SNP_A.K_871327_5_5378981   | 5 | 5378981  | 3.44E-07 | 0.41563 | 320 | 0.306261035 | 0.013527308 |
| SNP_A.K_1161223_6_30339552 | 6 | 30339552 | 3.68E-07 | 0.10938 | 320 | 0.305933031 | 0.013921663 |
| SNP_A.K_871232_5_5370906   | 5 | 5370906  | 3.68E-07 | 0.36563 | 320 | 0.305929381 | 0.013921663 |
| SNP_A.K_871318_5_5377857   | 5 | 5377857  | 4.36E-07 | 0.43438 | 320 | 0.305078084 | 0.016190688 |
| SNP_A.K_871247_5_5372050   | 5 | 5372050  | 4.57E-07 | 0.475   | 320 | 0.304835454 | 0.016692361 |
| SNP_A.K_871291_5_5375849   | 5 | 5375849  | 6.12E-07 | 0.37969 | 320 | 0.303367899 | 0.021968686 |
| SNP_A.K_871157_5_5362848   | 5 | 5362848  | 6.35E-07 | 0.3875  | 320 | 0.303185379 | 0.022396371 |
| SNP_A.K_871197_5_5368219   | 5 | 5368219  | 7.10E-07 | 0.3875  | 320 | 0.302621905 | 0.024642266 |
| SNP_A.K_871198_5_5368312   | 5 | 5368312  | 9.09E-07 | 0.38281 | 320 | 0.301385331 | 0.031029237 |
| SNP_A.K_871253_5_5372955   | 5 | 5372955  | 1.03E-06 | 0.48906 | 320 | 0.300780105 | 0.03445852  |
| SNP_A.K_871284_5_5375267   | 5 | 5375267  | 1.14E-06 | 0.46094 | 320 | 0.300275797 | 0.037515444 |
| SNP_A.K_871309_5_5377112   | 5 | 5377112  | 1.33E-06 | 0.4125  | 320 | 0.299485367 | 0.043271191 |

### Panicle\_axis

| SNP                         | Chr | Position | P.value  | maf     | nobs | Rsquare.of.Model.w | FDR_Adjusted_P-values |
|-----------------------------|-----|----------|----------|---------|------|--------------------|-----------------------|
| SNP_A.K_679358_4_1075655    | 4   | 1075655  | 3.17E-10 | 0.01302 | 192  | 0.240455921        | 0.000375146           |
| SNP_A.K_1151705_6_28676456  | 6   | 28676456 | 6.49E-10 | 0.00781 | 192  | 0.231306619        | 0.000375146           |
| SNP_A.K_1712473_10_14829875 | 10  | 14829875 | 6.66E-10 | 0.00781 | 192  | 0.23097996         | 0.000375146           |
| SNP_A.K_1681573_10_10214034 | 10  | 10214034 | 7.21E-10 | 0.00781 | 192  | 0.229984796        | 0.000375146           |
| SNP_A.K_288341_2_5011285    | 2   | 5011285  | 6.39E-09 | 0.01042 | 192  | 0.202709095        | 0.002393125           |
| SNP_A.K_1545254_9_7356966   | 9   | 7356966  | 7.71E-09 | 0.04427 | 192  | 0.200384457        | 0.002393125           |
| SNP_A.K_1543746_9_7148402   | 9   | 7148402  | 8.05E-09 | 0.01823 | 192  | 0.19986044         | 0.002393125           |
| SNP_A.K_1803408_11_6911996  | 11  | 6911996  | 3.24E-08 | 0.02604 | 192  | 0.182876074        | 0.008419603           |
| SNP_A.K_288314_2_5007783    | 2   | 5007783  | 4.60E-08 | 0.01302 | 192  | 0.178630124        | 0.009865679           |
| SNP_A.K_288469_2_5032381    | 2   | 5032381  | 8.93E-08 | 0.01302 | 192  | 0.170668312        | 0.009865679           |
| SNP_A.K_2076621_12_26474657 | 12  | 26474657 | 9.59E-08 | 0.03646 | 192  | 0.169820499        | 0.009865679           |
| SNP_A.K_1535441_9_6111975   | 9   | 6111975  | 1.01E-07 | 0.01042 | 192  | 0.169228264        | 0.009865679           |
| SNP_A.K_651649_3_32604953   | 3   | 32604953 | 1.03E-07 | 0.01823 | 192  | 0.168963853        | 0.009865679           |
| SNP_A.K_1192398_7_7094693   | 7   | 7094693  | 1.05E-07 | 0.01302 | 192  | 0.168746184        | 0.009865679           |
| SNP_A.K_288109_2_4988475    | 2   | 4988475  | 1.05E-07 | 0.01302 | 192  | 0.1687002          | 0.009865679           |
| SNP_A.K_288538_2_5037464    | 2   | 5037464  | 1.30E-07 | 0.01302 | 192  | 0.166199152        | 0.009865679           |
| SNP_A.K_1804778_11_7101390  | 11  | 7101390  | 1.36E-07 | 0.01042 | 192  | 0.16567253         | 0.009865679           |
| SNP_A.K_228078_1_37144984   | 1   | 37144984 | 1.66E-07 | 0.01042 | 192  | 0.163318027        | 0.009865679           |
| SNP_A.K_902536_5_16534350   | 5   | 16534350 | 1.79E-07 | 0.01042 | 192  | 0.162382738        | 0.009865679           |
| SNP_A.K_1557619_9_10009442  | 9   | 10009442 | 1.80E-07 | 0.00521 | 192  | 0.162300093        | 0.009865679           |

|                             |    |          |          |         |     |             |             |
|-----------------------------|----|----------|----------|---------|-----|-------------|-------------|
| SNP_A.K_1805532_11_7199542  | 11 | 7199542  | 1.80E-07 | 0.00521 | 192 | 0.162300093 | 0.009865679 |
| SNP_A.K_652308_3_32791155   | 3  | 32791155 | 1.80E-07 | 0.00521 | 192 | 0.162300093 | 0.009865679 |
| SNP_A.K_902551_5_16545655   | 5  | 16545655 | 1.80E-07 | 0.00521 | 192 | 0.162300093 | 0.009865679 |
| SNP_A.K_20343_1_3082541     | 1  | 3082541  | 1.90E-07 | 0.00781 | 192 | 0.161705289 | 0.009865679 |
| SNP_A.K_829651_4_33918753   | 4  | 33918753 | 1.98E-07 | 0.00521 | 192 | 0.16117166  | 0.009865679 |
| SNP_A.K_870468_5_5303956    | 5  | 5303956  | 1.98E-07 | 0.00521 | 192 | 0.16117166  | 0.009865679 |
| SNP_A.K_953607_5_25097135   | 5  | 25097135 | 1.98E-07 | 0.00521 | 192 | 0.16117166  | 0.009865679 |
| SNP_A.K_1606956_9_20241256  | 9  | 20241256 | 1.98E-07 | 0.00521 | 192 | 0.16117166  | 0.009865679 |
| SNP_A.K_384409_2_19153339   | 2  | 19153339 | 1.98E-07 | 0.00521 | 192 | 0.16117166  | 0.009865679 |
| SNP_A.K_526677_3_10964889   | 3  | 10964889 | 1.98E-07 | 0.00521 | 192 | 0.16117166  | 0.009865679 |
| SNP_A.K_1288155_7_22249791  | 7  | 22249791 | 1.98E-07 | 0.00521 | 192 | 0.16117166  | 0.009865679 |
| SNP_A.K_648754_3_31937585   | 3  | 31937585 | 2.07E-07 | 0.01042 | 192 | 0.160645541 | 0.009865679 |
| SNP_A.K_526222_3_10849783   | 3  | 10849783 | 2.30E-07 | 0.00521 | 192 | 0.15942989  | 0.009865679 |
| SNP_A.K_863296_5_3678971    | 5  | 3678971  | 2.30E-07 | 0.00521 | 192 | 0.15942989  | 0.009865679 |
| SNP_A.K_806606_4_29505446   | 4  | 29505446 | 2.30E-07 | 0.00521 | 192 | 0.15942989  | 0.009865679 |
| SNP_A.K_288218_2_4998843    | 2  | 4998843  | 2.32E-07 | 0.00521 | 192 | 0.159309678 | 0.009865679 |
| SNP_A.K_288228_2_4999616    | 2  | 4999616  | 2.32E-07 | 0.00521 | 192 | 0.159309678 | 0.009865679 |
| SNP_A.K_288229_2_4999648    | 2  | 4999648  | 2.32E-07 | 0.00521 | 192 | 0.159309678 | 0.009865679 |
| SNP_A.K_315911_2_8310508    | 2  | 8310508  | 2.32E-07 | 0.00521 | 192 | 0.159309678 | 0.009865679 |
| SNP_A.K_817407_4_31495768   | 4  | 31495768 | 2.32E-07 | 0.00521 | 192 | 0.159309678 | 0.009865679 |
| SNP_A.K_885802_5_8945161    | 5  | 8945161  | 2.32E-07 | 0.00521 | 192 | 0.159309678 | 0.009865679 |
| SNP_A.K_886511_5_13003572   | 5  | 13003572 | 2.32E-07 | 0.00521 | 192 | 0.159309678 | 0.009865679 |
| SNP_A.K_1371552_8_7852191   | 8  | 7852191  | 2.32E-07 | 0.00521 | 192 | 0.159309678 | 0.009865679 |
| SNP_A.K_363616_2_16455997   | 2  | 16455997 | 2.32E-07 | 0.00521 | 192 | 0.159309678 | 0.009865679 |
| SNP_A.K_528009_3_11220328   | 3  | 11220328 | 2.32E-07 | 0.00521 | 192 | 0.159309678 | 0.009865679 |
| SNP_A.K_1154455_6_29052368  | 6  | 29052368 | 2.32E-07 | 0.00521 | 192 | 0.159309678 | 0.009865679 |
| SNP_A.K_1371604_8_7858316   | 8  | 7858316  | 2.32E-07 | 0.00521 | 192 | 0.159309678 | 0.009865679 |
| SNP_A.K_1605756_9_19946683  | 9  | 19946683 | 2.32E-07 | 0.00521 | 192 | 0.159309678 | 0.009865679 |
| SNP_A.K_1752246_10_19901886 | 10 | 19901886 | 2.32E-07 | 0.00521 | 192 | 0.159309678 | 0.009865679 |
| SNP_A.K_889109_5_14206551   | 5  | 14206551 | 2.60E-07 | 0.00521 | 192 | 0.157999695 | 0.010622622 |
| SNP_A.K_366621_2_16762351   | 2  | 16762351 | 2.76E-07 | 0.00521 | 192 | 0.157291193 | 0.010622622 |
| SNP_A.K_1342595_8_2940419   | 8  | 2940419  | 2.76E-07 | 0.00521 | 192 | 0.157291193 | 0.010622622 |
| SNP_A.K_1647732_10_4648118  | 10 | 4648118  | 2.76E-07 | 0.00521 | 192 | 0.157291193 | 0.010622622 |
| SNP_A.K_1948607_12_2150360  | 12 | 2150360  | 2.76E-07 | 0.00521 | 192 | 0.157291193 | 0.010622622 |
| SNP_A.K_324792_2_9780295    | 2  | 9780295  | 2.99E-07 | 0.00521 | 192 | 0.156346969 | 0.010903451 |
| SNP_A.K_1371510_8_7850476   | 8  | 7850476  | 2.99E-07 | 0.00521 | 192 | 0.156346969 | 0.010903451 |
| SNP_A.K_20116_1_3038515     | 1  | 3038515  | 2.99E-07 | 0.00521 | 192 | 0.156346969 | 0.010903451 |
| SNP_A.K_1031878_6_11251082  | 6  | 11251082 | 3.19E-07 | 0.05729 | 192 | 0.155580251 | 0.01143683  |
| SNP_A.K_1739574_10_18161913 | 10 | 18161913 | 3.39E-07 | 0.01563 | 192 | 0.154867798 | 0.011945243 |
| SNP_A.K_288315_2_5007791    | 2  | 5007791  | 4.06E-07 | 0.01563 | 192 | 0.152731017 | 0.01387566  |
| SNP_A.K_1489858_8_27232205  | 8  | 27232205 | 4.07E-07 | 0.05469 | 192 | 0.152717642 | 0.01387566  |
| SNP_A.K_1794053_11_5377516  | 11 | 5377516  | 5.23E-07 | 0.04948 | 192 | 0.149765601 | 0.01756694  |
| SNP_A.K_1535465_9_6113565   | 9  | 6113565  | 6.51E-07 | 0.01563 | 192 | 0.147221977 | 0.02128225  |
| SNP_A.K_686965_4_2890383    | 4  | 2890383  | 6.54E-07 | 0.08333 | 192 | 0.147155718 | 0.02128225  |
| SNP_A.K_1685877_10_10754153 | 10 | 10754153 | 8.67E-07 | 0.01563 | 192 | 0.143887956 | 0.022991894 |
| SNP_A.K_864827_5_4097990    | 5  | 4097990  | 8.85E-07 | 0.02083 | 192 | 0.14363822  | 0.022991894 |
| SNP_A.K_1648152_10_4704356  | 10 | 4704356  | 9.04E-07 | 0.01563 | 192 | 0.143392915 | 0.022991894 |
| SNP_A.K_707999_4_7494052    | 4  | 7494052  | 1.00E-06 | 0.15625 | 192 | 0.142200898 | 0.022991894 |
| SNP_A.K_288103_2_4987974    | 2  | 4987974  | 1.15E-06 | 0.00781 | 192 | 0.140620569 | 0.022991894 |
| SNP_A.K_288114_2_4988672    | 2  | 4988672  | 1.15E-06 | 0.00781 | 192 | 0.140620569 | 0.022991894 |

|                             |    |          |          |         |     |             |             |
|-----------------------------|----|----------|----------|---------|-----|-------------|-------------|
| SNP_A.K_288116_2_4988805    | 2  | 4988805  | 1.15E-06 | 0.00781 | 192 | 0.140620569 | 0.022991894 |
| SNP_A.K_288122_2_4989029    | 2  | 4989029  | 1.15E-06 | 0.00781 | 192 | 0.140620569 | 0.022991894 |
| SNP_A.K_288123_2_4989036    | 2  | 4989036  | 1.15E-06 | 0.00781 | 192 | 0.140620569 | 0.022991894 |
| SNP_A.K_288132_2_4990502    | 2  | 4990502  | 1.15E-06 | 0.00781 | 192 | 0.140620569 | 0.022991894 |
| SNP_A.K_288136_2_4991126    | 2  | 4991126  | 1.15E-06 | 0.00781 | 192 | 0.140620569 | 0.022991894 |
| SNP_A.K_288144_2_4991792    | 2  | 4991792  | 1.15E-06 | 0.00781 | 192 | 0.140620569 | 0.022991894 |
| SNP_A.K_288145_2_4991816    | 2  | 4991816  | 1.15E-06 | 0.00781 | 192 | 0.140620569 | 0.022991894 |
| SNP_A.K_288150_2_4992218    | 2  | 4992218  | 1.15E-06 | 0.00781 | 192 | 0.140620569 | 0.022991894 |
| SNP_A.K_288157_2_4992816    | 2  | 4992816  | 1.15E-06 | 0.00781 | 192 | 0.140620569 | 0.022991894 |
| SNP_A.K_288158_2_4992821    | 2  | 4992821  | 1.15E-06 | 0.00781 | 192 | 0.140620569 | 0.022991894 |
| SNP_A.K_288163_2_4993339    | 2  | 4993339  | 1.15E-06 | 0.00781 | 192 | 0.140620569 | 0.022991894 |
| SNP_A.K_288164_2_4993351    | 2  | 4993351  | 1.15E-06 | 0.00781 | 192 | 0.140620569 | 0.022991894 |
| SNP_A.K_288178_2_4994046    | 2  | 4994046  | 1.15E-06 | 0.00781 | 192 | 0.140620569 | 0.022991894 |
| SNP_A.K_288189_2_4995195    | 2  | 4995195  | 1.15E-06 | 0.00781 | 192 | 0.140620569 | 0.022991894 |
| SNP_A.K_288197_2_4997655    | 2  | 4997655  | 1.15E-06 | 0.00781 | 192 | 0.140620569 | 0.022991894 |
| SNP_A.K_288279_2_5003424    | 2  | 5003424  | 1.15E-06 | 0.00781 | 192 | 0.140620569 | 0.022991894 |
| SNP_A.K_288290_2_5004458    | 2  | 5004458  | 1.15E-06 | 0.00781 | 192 | 0.140620569 | 0.022991894 |
| SNP_A.K_288493_2_5034560    | 2  | 5034560  | 1.15E-06 | 0.00781 | 192 | 0.140620569 | 0.022991894 |
| SNP_A.K_288563_2_5041476    | 2  | 5041476  | 1.15E-06 | 0.00781 | 192 | 0.140620569 | 0.022991894 |
| SNP_A.K_288565_2_5042437    | 2  | 5042437  | 1.15E-06 | 0.00781 | 192 | 0.140620569 | 0.022991894 |
| SNP_A.K_288092_2_4986793    | 2  | 4986793  | 1.15E-06 | 0.00781 | 192 | 0.140620569 | 0.022991894 |
| SNP_A.K_288113_2_4988667    | 2  | 4988667  | 1.15E-06 | 0.00781 | 192 | 0.140620569 | 0.022991894 |
| SNP_A.K_288120_2_4988990    | 2  | 4988990  | 1.15E-06 | 0.00781 | 192 | 0.140620569 | 0.022991894 |
| SNP_A.K_288125_2_4989212    | 2  | 4989212  | 1.15E-06 | 0.00781 | 192 | 0.140620569 | 0.022991894 |
| SNP_A.K_288146_2_4991828    | 2  | 4991828  | 1.15E-06 | 0.00781 | 192 | 0.140620569 | 0.022991894 |
| SNP_A.K_288156_2_4992518    | 2  | 4992518  | 1.15E-06 | 0.00781 | 192 | 0.140620569 | 0.022991894 |
| SNP_A.K_288184_2_4994991    | 2  | 4994991  | 1.15E-06 | 0.00781 | 192 | 0.140620569 | 0.022991894 |
| SNP_A.K_288194_2_4996097    | 2  | 4996097  | 1.15E-06 | 0.00781 | 192 | 0.140620569 | 0.022991894 |
| SNP_A.K_288199_2_4997717    | 2  | 4997717  | 1.15E-06 | 0.00781 | 192 | 0.140620569 | 0.022991894 |
| SNP_A.K_288285_2_5004065    | 2  | 5004065  | 1.15E-06 | 0.00781 | 192 | 0.140620569 | 0.022991894 |
| SNP_A.K_288287_2_5004370    | 2  | 5004370  | 1.15E-06 | 0.00781 | 192 | 0.140620569 | 0.022991894 |
| SNP_A.K_288399_2_5021434    | 2  | 5021434  | 1.15E-06 | 0.00781 | 192 | 0.140620569 | 0.022991894 |
| SNP_A.K_288492_2_5034545    | 2  | 5034545  | 1.15E-06 | 0.00781 | 192 | 0.140620569 | 0.022991894 |
| SNP_A.K_288500_2_5034670    | 2  | 5034670  | 1.15E-06 | 0.00781 | 192 | 0.140620569 | 0.022991894 |
| SNP_A.K_1319559_7_27994549  | 7  | 27994549 | 1.24E-06 | 0.1276  | 192 | 0.139745505 | 0.024563099 |
| SNP_A.K_1348256_8_3577908   | 8  | 3577908  | 1.53E-06 | 0.06771 | 192 | 0.137311694 | 0.030043156 |
| SNP_A.K_1895518_11_19527653 | 11 | 19527653 | 1.67E-06 | 0.01302 | 192 | 0.136327774 | 0.03241629  |
| SNP_A.K_1535491_9_6115356   | 9  | 6115356  | 1.73E-06 | 0.01823 | 192 | 0.135906264 | 0.033314097 |
| SNP_A.K_1535444_9_6112050   | 9  | 6112050  | 1.85E-06 | 0.01302 | 192 | 0.135124702 | 0.035329405 |
| SNP_A.K_635764_3_29600462   | 3  | 29600462 | 2.00E-06 | 0.01302 | 192 | 0.134252287 | 0.037769687 |
| SNP_A.K_1451681_8_19195204  | 8  | 19195204 | 2.09E-06 | 0.01302 | 192 | 0.133735238 | 0.038811359 |
| SNP_A.K_1681526_10_10209690 | 10 | 10209690 | 2.09E-06 | 0.02083 | 192 | 0.133733048 | 0.038811359 |
| SNP_A.K_1319500_7_27992765  | 7  | 27992765 | 2.18E-06 | 0.13802 | 192 | 0.133252989 | 0.040111403 |
| SNP_A.K_1319502_7_27992803  | 7  | 27992803 | 2.26E-06 | 0.13802 | 192 | 0.132810986 | 0.041321829 |
| SNP_A.K_833731_4_34877438   | 4  | 34877438 | 2.49E-06 | 0.16406 | 192 | 0.131717518 | 0.045064259 |
| SNP_A.K_732137_4_13283083   | 4  | 13283083 | 2.61E-06 | 0.01302 | 192 | 0.131198068 | 0.046749777 |
| SNP_A.K_1319571_7_27995114  | 7  | 27995114 | 2.67E-06 | 0.1224  | 192 | 0.130914771 | 0.047512162 |
| SNP_A.K_287596_2_4900668    | 2  | 4900668  | 2.70E-06 | 0.01823 | 192 | 0.130773894 | 0.047622921 |
| SNP_A.K_205192_1_32937176   | 1  | 32937176 | 2.72E-06 | 0.21875 | 192 | 0.130694263 | 0.047622921 |
| SNP_A.K_690585_4_4456947    | 4  | 4456947  | 2.79E-06 | 0.08333 | 192 | 0.130407954 | 0.048423449 |

| SNP_A.K_288630_2_5052237   | 2   | 5052237  | 2.90E-06 | 0.01823 | 192  | 0.129982885        | 0.049842802           |
|----------------------------|-----|----------|----------|---------|------|--------------------|-----------------------|
| Secondary branching        |     |          |          |         |      |                    |                       |
| SNP                        | Chr | Position | P.value  | maf     | nobs | Rsquare.of.Model.w | FDR_Adjusted_P-values |
| SNP_A.K_943938_5_23236471  | 5   | 23236471 | 2.84E-13 | 0.03646 | 192  | 0.336997249        | 5.90E-07              |
| SNP_A.K_288472_2_5032535   | 2   | 5032535  | 6.16E-13 | 0.01302 | 192  | 0.326360828        | 6.41E-07              |
| SNP_A.K_288170_2_4993555   | 2   | 4993555  | 1.47E-10 | 0.00521 | 192  | 0.253814777        | 6.54E-05              |
| SNP_A.K_288426_2_5026842   | 2   | 5026842  | 1.47E-10 | 0.0026  | 192  | 0.253814777        | 6.54E-05              |
| SNP_A.K_288394_2_5019623   | 2   | 5019623  | 1.57E-10 | 0.01823 | 192  | 0.252979335        | 6.54E-05              |
| SNP_A.K_1804778_11_7101390 | 11  | 7101390  | 2.12E-10 | 0.01042 | 192  | 0.249155177        | 7.35E-05              |
| SNP_A.K_685981_4_2521459   | 4   | 2521459  | 6.42E-10 | 0.05208 | 192  | 0.235063036        | 0.000168791           |
| SNP_A.K_729010_4_12427420  | 4   | 12427420 | 6.49E-10 | 0.20833 | 192  | 0.234932229        | 0.000168791           |
| SNP_A.K_730543_4_12698858  | 4   | 12698858 | 2.11E-09 | 0.21615 | 192  | 0.220132701        | 0.000316358           |
| SNP_A.K_157462_1_24620999  | 1   | 24620999 | 2.42E-09 | 0.05469 | 192  | 0.218459856        | 0.000316358           |
| SNP_A.K_730545_4_12698917  | 4   | 12698917 | 2.81E-09 | 0.21875 | 192  | 0.216585041        | 0.000316358           |
| SNP_A.K_730538_4_12698678  | 4   | 12698678 | 2.81E-09 | 0.21875 | 192  | 0.21657872         | 0.000316358           |
| SNP_A.K_729056_4_12506341  | 4   | 12506341 | 6.32E-09 | 0.21354 | 192  | 0.206587188        | 0.000316358           |
| SNP_A.K_1174598_7_1762446  | 7   | 1762446  | 6.74E-09 | 0.02865 | 192  | 0.205797728        | 0.000316358           |
| SNP_A.K_288103_2_4987974   | 2   | 4987974  | 7.60E-09 | 0.00781 | 192  | 0.204321736        | 0.000316358           |
| SNP_A.K_288114_2_4988672   | 2   | 4988672  | 7.60E-09 | 0.00781 | 192  | 0.204321736        | 0.000316358           |
| SNP_A.K_288116_2_4988805   | 2   | 4988805  | 7.60E-09 | 0.00781 | 192  | 0.204321736        | 0.000316358           |
| SNP_A.K_288122_2_4989029   | 2   | 4989029  | 7.60E-09 | 0.00781 | 192  | 0.204321736        | 0.000316358           |
| SNP_A.K_288123_2_4989036   | 2   | 4989036  | 7.60E-09 | 0.00781 | 192  | 0.204321736        | 0.000316358           |
| SNP_A.K_288132_2_4990502   | 2   | 4990502  | 7.60E-09 | 0.00781 | 192  | 0.204321736        | 0.000316358           |
| SNP_A.K_288136_2_4991126   | 2   | 4991126  | 7.60E-09 | 0.00781 | 192  | 0.204321736        | 0.000316358           |
| SNP_A.K_288144_2_4991792   | 2   | 4991792  | 7.60E-09 | 0.00781 | 192  | 0.204321736        | 0.000316358           |
| SNP_A.K_288145_2_4991816   | 2   | 4991816  | 7.60E-09 | 0.00781 | 192  | 0.204321736        | 0.000316358           |
| SNP_A.K_288150_2_4992218   | 2   | 4992218  | 7.60E-09 | 0.00781 | 192  | 0.204321736        | 0.000316358           |
| SNP_A.K_288157_2_4992816   | 2   | 4992816  | 7.60E-09 | 0.00781 | 192  | 0.204321736        | 0.000316358           |
| SNP_A.K_288158_2_4992821   | 2   | 4992821  | 7.60E-09 | 0.00781 | 192  | 0.204321736        | 0.000316358           |
| SNP_A.K_288163_2_4993339   | 2   | 4993339  | 7.60E-09 | 0.00781 | 192  | 0.204321736        | 0.000316358           |
| SNP_A.K_288164_2_4993351   | 2   | 4993351  | 7.60E-09 | 0.00781 | 192  | 0.204321736        | 0.000316358           |
| SNP_A.K_288178_2_4994046   | 2   | 4994046  | 7.60E-09 | 0.00781 | 192  | 0.204321736        | 0.000316358           |
| SNP_A.K_288189_2_4995195   | 2   | 4995195  | 7.60E-09 | 0.00781 | 192  | 0.204321736        | 0.000316358           |
| SNP_A.K_288197_2_4997655   | 2   | 4997655  | 7.60E-09 | 0.00781 | 192  | 0.204321736        | 0.000316358           |
| SNP_A.K_288279_2_5003424   | 2   | 5003424  | 7.60E-09 | 0.00781 | 192  | 0.204321736        | 0.000316358           |
| SNP_A.K_288290_2_5004458   | 2   | 5004458  | 7.60E-09 | 0.00781 | 192  | 0.204321736        | 0.000316358           |
| SNP_A.K_288493_2_5034560   | 2   | 5034560  | 7.60E-09 | 0.00781 | 192  | 0.204321736        | 0.000316358           |
| SNP_A.K_288563_2_5041476   | 2   | 5041476  | 7.60E-09 | 0.00781 | 192  | 0.204321736        | 0.000316358           |
| SNP_A.K_288565_2_5042437   | 2   | 5042437  | 7.60E-09 | 0.00781 | 192  | 0.204321736        | 0.000316358           |
| SNP_A.K_288092_2_4986793   | 2   | 4986793  | 7.60E-09 | 0.00781 | 192  | 0.204321736        | 0.000316358           |
| SNP_A.K_288113_2_4988667   | 2   | 4988667  | 7.60E-09 | 0.00781 | 192  | 0.204321736        | 0.000316358           |
| SNP_A.K_288120_2_4988990   | 2   | 4988990  | 7.60E-09 | 0.00781 | 192  | 0.204321736        | 0.000316358           |
| SNP_A.K_288125_2_4989212   | 2   | 4989212  | 7.60E-09 | 0.00781 | 192  | 0.204321736        | 0.000316358           |
| SNP_A.K_288146_2_4991828   | 2   | 4991828  | 7.60E-09 | 0.00781 | 192  | 0.204321736        | 0.000316358           |
| SNP_A.K_288156_2_4992518   | 2   | 4992518  | 7.60E-09 | 0.00781 | 192  | 0.204321736        | 0.000316358           |
| SNP_A.K_288184_2_4994991   | 2   | 4994991  | 7.60E-09 | 0.00781 | 192  | 0.204321736        | 0.000316358           |
| SNP_A.K_288194_2_4996097   | 2   | 4996097  | 7.60E-09 | 0.00781 | 192  | 0.204321736        | 0.000316358           |
| SNP_A.K_288199_2_4997717   | 2   | 4997717  | 7.60E-09 | 0.00781 | 192  | 0.204321736        | 0.000316358           |
| SNP_A.K_288285_2_5004065   | 2   | 5004065  | 7.60E-09 | 0.00781 | 192  | 0.204321736        | 0.000316358           |
| SNP_A.K_288287_2_5004370   | 2   | 5004370  | 7.60E-09 | 0.00781 | 192  | 0.204321736        | 0.000316358           |

|                             |    |          |          |         |     |             |             |
|-----------------------------|----|----------|----------|---------|-----|-------------|-------------|
| SNP_A.K_288399_2_5021434    | 2  | 5021434  | 7.60E-09 | 0.00781 | 192 | 0.204321736 | 0.000316358 |
| SNP_A.K_288492_2_5034545    | 2  | 5034545  | 7.60E-09 | 0.00781 | 192 | 0.204321736 | 0.000316358 |
| SNP_A.K_288500_2_5034670    | 2  | 5034670  | 7.60E-09 | 0.00781 | 192 | 0.204321736 | 0.000316358 |
| SNP_A.K_1924289_11_24625870 | 11 | 24625870 | 8.06E-09 | 0.00781 | 192 | 0.203592749 | 0.000329165 |
| SNP_A.K_1159169_6_29751394  | 6  | 29751394 | 9.57E-09 | 0.04427 | 192 | 0.201505066 | 0.000380769 |
| SNP_A.K_679358_4_1075655    | 4  | 1075655  | 9.70E-09 | 0.01302 | 192 | 0.201339957 | 0.000380769 |
| SNP_A.K_288425_2_5026783    | 2  | 5026783  | 9.89E-09 | 0.00781 | 192 | 0.201100453 | 0.000381113 |
| SNP_A.K_730546_4_12698925   | 4  | 12698925 | 1.76E-08 | 0.22396 | 192 | 0.194063514 | 0.000666865 |
| SNP_A.K_730533_4_12698403   | 4  | 12698403 | 2.22E-08 | 0.21875 | 192 | 0.191244483 | 0.000821583 |
| SNP_A.K_1175144_7_1827324   | 7  | 1827324  | 2.29E-08 | 0.03125 | 192 | 0.190891979 | 0.000821583 |
| SNP_A.K_1175146_7_1827355   | 7  | 1827355  | 2.29E-08 | 0.03125 | 192 | 0.190891979 | 0.000821583 |
| SNP_A.K_709666_4_8279704    | 4  | 8279704  | 2.85E-08 | 0.07552 | 192 | 0.188253272 | 0.001004809 |
| SNP_A.K_725892_4_11878318   | 4  | 11878318 | 3.30E-08 | 0.13281 | 192 | 0.186472334 | 0.001145376 |
| SNP_A.K_725933_4_11886168   | 4  | 11886168 | 3.38E-08 | 0.125   | 192 | 0.186198339 | 0.001152527 |
| SNP_A.K_706653_4_6930584    | 4  | 6930584  | 3.56E-08 | 0.14844 | 192 | 0.185578044 | 0.001193908 |
| SNP_A.K_709709_4_8282833    | 4  | 8282833  | 3.71E-08 | 0.07552 | 192 | 0.185057843 | 0.001226881 |
| SNP_A.K_708854_4_8117317    | 4  | 8117317  | 3.97E-08 | 0.07813 | 192 | 0.184260118 | 0.001279343 |
| SNP_A.K_709711_4_8282848    | 4  | 8282848  | 4.04E-08 | 0.07292 | 192 | 0.18403749  | 0.001279343 |
| SNP_A.K_708636_4_8069030    | 4  | 8069030  | 4.06E-08 | 0.07292 | 192 | 0.183995413 | 0.001279343 |
| SNP_A.K_708905_4_8123294    | 4  | 8123294  | 4.39E-08 | 0.07292 | 192 | 0.183047585 | 0.00136376  |
| SNP_A.K_709119_4_8229490    | 4  | 8229490  | 4.92E-08 | 0.08073 | 192 | 0.181672855 | 0.001506903 |
| SNP_A.K_1175140_7_1827092   | 7  | 1827092  | 5.33E-08 | 0.03385 | 192 | 0.18072936  | 0.001606762 |
| SNP_A.K_1028690_6_10678950  | 6  | 10678950 | 5.54E-08 | 0.04167 | 192 | 0.180248307 | 0.001648754 |
| SNP_A.K_708866_4_8119634    | 4  | 8119634  | 5.80E-08 | 0.07552 | 192 | 0.179704488 | 0.001682483 |
| SNP_A.K_1813672_11_8565228  | 11 | 8565228  | 5.82E-08 | 0.14323 | 192 | 0.179669008 | 0.001682483 |
| SNP_A.K_1552916_9_9224803   | 9  | 9224803  | 6.07E-08 | 0.23177 | 192 | 0.179169635 | 0.001730208 |
| SNP_A.K_708816_4_8115086    | 4  | 8115086  | 6.39E-08 | 0.05469 | 192 | 0.178546584 | 0.001798178 |
| SNP_A.K_708864_4_8119296    | 4  | 8119296  | 7.16E-08 | 0.07292 | 192 | 0.177189339 | 0.001944605 |
| SNP_A.K_709754_4_8284876    | 4  | 8284876  | 7.26E-08 | 0.07552 | 192 | 0.177024612 | 0.001944605 |
| SNP_A.K_709718_4_8283165    | 4  | 8283165  | 7.32E-08 | 0.07552 | 192 | 0.176926237 | 0.001944605 |
| SNP_A.K_708762_4_8111293    | 4  | 8111293  | 7.37E-08 | 0.07552 | 192 | 0.176845436 | 0.001944605 |
| SNP_A.K_288155_2_4992514    | 2  | 4992514  | 7.38E-08 | 0.01042 | 192 | 0.176831818 | 0.001944605 |
| SNP_A.K_709712_4_8282869    | 4  | 8282869  | 7.50E-08 | 0.07552 | 192 | 0.17663705  | 0.001947865 |
| SNP_A.K_288501_2_5034949    | 2  | 5034949  | 7.66E-08 | 0.01042 | 192 | 0.176387863 | 0.001947865 |
| SNP_A.K_708808_4_8114964    | 4  | 8114964  | 7.76E-08 | 0.08073 | 192 | 0.176230756 | 0.001947865 |
| SNP_A.K_288133_2_4990519    | 2  | 4990519  | 7.77E-08 | 0.01042 | 192 | 0.176223025 | 0.001947865 |
| SNP_A.K_724652_4_11653571   | 4  | 11653571 | 8.02E-08 | 0.21615 | 192 | 0.175846218 | 0.001963953 |
| SNP_A.K_709717_4_8283123    | 4  | 8283123  | 8.02E-08 | 0.08333 | 192 | 0.175841311 | 0.001963953 |
| SNP_A.K_1552868_9_9222748   | 9  | 9222748  | 8.31E-08 | 0.19271 | 192 | 0.175417889 | 0.001999632 |
| SNP_A.K_709278_4_8245620    | 4  | 8245620  | 8.46E-08 | 0.08073 | 192 | 0.175211783 | 0.001999632 |
| SNP_A.K_708852_4_8117281    | 4  | 8117281  | 8.46E-08 | 0.07813 | 192 | 0.175201379 | 0.001999632 |
| SNP_A.K_1552915_9_9224800   | 9  | 9224800  | 8.55E-08 | 0.2474  | 192 | 0.175079327 | 0.001999632 |
| SNP_A.K_288499_2_5034621    | 2  | 5034621  | 8.72E-08 | 0.01042 | 192 | 0.174839166 | 0.00201772  |
| SNP_A.K_1552942_9_9225590   | 9  | 9225590  | 8.89E-08 | 0.1901  | 192 | 0.174611672 | 0.002034067 |
| SNP_A.K_709714_4_8282955    | 4  | 8282955  | 9.45E-08 | 0.08073 | 192 | 0.173887109 | 0.002041189 |
| SNP_A.K_288384_2_5019012    | 2  | 5019012  | 9.57E-08 | 0.01042 | 192 | 0.173742773 | 0.002041189 |
| SNP_A.K_288112_2_4988622    | 2  | 4988622  | 9.57E-08 | 0.01042 | 192 | 0.173739233 | 0.002041189 |
| SNP_A.K_288322_2_5007971    | 2  | 5007971  | 9.57E-08 | 0.01042 | 192 | 0.173739233 | 0.002041189 |
| SNP_A.K_288550_2_5038140    | 2  | 5038140  | 9.57E-08 | 0.01042 | 192 | 0.173739233 | 0.002041189 |
| SNP_A.K_1939603_11_28480520 | 11 | 28480520 | 9.92E-08 | 0.03646 | 192 | 0.173308585 | 0.002041189 |

|                            |    |          |          |         |     |             |             |
|----------------------------|----|----------|----------|---------|-----|-------------|-------------|
| SNP_A.K_1552943_9_9225600  | 9  | 9225600  | 1.01E-07 | 0.1875  | 192 | 0.173115523 | 0.002041189 |
| SNP_A.K_708809_4_8114977   | 4  | 8114977  | 1.02E-07 | 0.08073 | 192 | 0.173017302 | 0.002041189 |
| SNP_A.K_708645_4_8070065   | 4  | 8070065  | 1.02E-07 | 0.08333 | 192 | 0.172944751 | 0.002041189 |
| SNP_A.K_1552874_9_9223041  | 9  | 9223041  | 1.08E-07 | 0.20052 | 192 | 0.172312673 | 0.002041189 |
| SNP_A.K_730540_4_12698747  | 4  | 12698747 | 1.08E-07 | 0.22917 | 192 | 0.172255916 | 0.002041189 |
| SNP_A.K_725879_4_11877029  | 4  | 11877029 | 1.09E-07 | 0.13281 | 192 | 0.172196628 | 0.002041189 |
| SNP_A.K_288497_2_5034592   | 2  | 5034592  | 1.10E-07 | 0.01042 | 192 | 0.172034238 | 0.002041189 |
| SNP_A.K_288139_2_4991452   | 2  | 4991452  | 1.14E-07 | 0.01042 | 192 | 0.171711709 | 0.002041189 |
| SNP_A.K_288398_2_5021121   | 2  | 5021121  | 1.14E-07 | 0.01042 | 192 | 0.17164415  | 0.002041189 |
| SNP_A.K_708810_4_8114983   | 4  | 8114983  | 1.14E-07 | 0.08073 | 192 | 0.171631196 | 0.002041189 |
| SNP_A.K_708811_4_8114995   | 4  | 8114995  | 1.19E-07 | 0.07813 | 192 | 0.171130021 | 0.002041189 |
| SNP_A.K_288376_2_5017884   | 2  | 5017884  | 1.19E-07 | 0.01042 | 192 | 0.171125272 | 0.002041189 |
| SNP_A.K_724877_4_11690622  | 4  | 11690622 | 1.20E-07 | 0.21615 | 192 | 0.17102922  | 0.002041189 |
| SNP_A.K_708655_4_8071479   | 4  | 8071479  | 1.21E-07 | 0.07292 | 192 | 0.170962382 | 0.002041189 |
| SNP_A.K_288449_2_5028561   | 2  | 5028561  | 1.21E-07 | 0.01042 | 192 | 0.170914639 | 0.002041189 |
| SNP_A.K_709546_4_8273241   | 4  | 8273241  | 1.22E-07 | 0.07813 | 192 | 0.170899031 | 0.002041189 |
| SNP_A.K_1953646_12_3610642 | 12 | 3610642  | 1.23E-07 | 0.07552 | 192 | 0.170714354 | 0.002041189 |
| SNP_A.K_1027527_6_10421615 | 6  | 10421615 | 1.26E-07 | 0.03125 | 192 | 0.170491664 | 0.002041189 |
| SNP_A.K_1552866_9_9222708  | 9  | 9222708  | 1.26E-07 | 0.20052 | 192 | 0.170457063 | 0.002041189 |
| SNP_A.K_708807_4_8114955   | 4  | 8114955  | 1.27E-07 | 0.08333 | 192 | 0.170379353 | 0.002041189 |
| SNP_A.K_725248_4_11767129  | 4  | 11767129 | 1.28E-07 | 0.21354 | 192 | 0.170320189 | 0.002041189 |
| SNP_A.K_709741_4_8284570   | 4  | 8284570  | 1.29E-07 | 0.07552 | 192 | 0.170167379 | 0.002041189 |
| SNP_A.K_708859_4_8118449   | 4  | 8118449  | 1.30E-07 | 0.07813 | 192 | 0.170086088 | 0.002041189 |
| SNP_A.K_709729_4_8284091   | 4  | 8284091  | 1.36E-07 | 0.07552 | 192 | 0.169586071 | 0.002041189 |
| SNP_A.K_288159_2_4992884   | 2  | 4992884  | 1.37E-07 | 0.01042 | 192 | 0.169464472 | 0.002041189 |
| SNP_A.K_723720_4_11498296  | 4  | 11498296 | 1.38E-07 | 0.21354 | 192 | 0.169417047 | 0.002041189 |
| SNP_A.K_288173_2_4993935   | 2  | 4993935  | 1.39E-07 | 0.01042 | 192 | 0.169329644 | 0.002041189 |
| SNP_A.K_288177_2_4994000   | 2  | 4994000  | 1.39E-07 | 0.01042 | 192 | 0.169329644 | 0.002041189 |
| SNP_A.K_1487843_8_26986462 | 8  | 26986462 | 1.41E-07 | 0.03906 | 192 | 0.169121119 | 0.002041189 |
| SNP_A.K_709279_4_8245639   | 4  | 8245639  | 1.43E-07 | 0.08333 | 192 | 0.168987881 | 0.002041189 |
| SNP_A.K_709273_4_8245255   | 4  | 8245255  | 1.43E-07 | 0.07813 | 192 | 0.168961616 | 0.002041189 |
| SNP_A.K_1487950_8_26990220 | 8  | 26990220 | 1.45E-07 | 0.03385 | 192 | 0.168792833 | 0.002041189 |
| SNP_A.K_725895_4_11878735  | 4  | 11878735 | 1.46E-07 | 0.13021 | 192 | 0.168725207 | 0.002041189 |
| SNP_A.K_1552848_9_9222236  | 9  | 9222236  | 1.47E-07 | 0.1849  | 192 | 0.168673885 | 0.002041189 |
| SNP_A.K_709696_4_8281788   | 4  | 8281788  | 1.48E-07 | 0.08073 | 192 | 0.168592023 | 0.002041189 |
| SNP_A.K_288160_2_4993128   | 2  | 4993128  | 1.48E-07 | 0.01042 | 192 | 0.168574117 | 0.002041189 |
| SNP_A.K_288119_2_4988952   | 2  | 4988952  | 1.52E-07 | 0.01042 | 192 | 0.16822123  | 0.002041189 |
| SNP_A.K_724618_4_11646202  | 4  | 11646202 | 1.53E-07 | 0.17188 | 192 | 0.168177821 | 0.002041189 |
| SNP_A.K_288105_2_4988403   | 2  | 4988403  | 1.53E-07 | 0.01042 | 192 | 0.168155529 | 0.002041189 |
| SNP_A.K_288110_2_4988498   | 2  | 4988498  | 1.53E-07 | 0.01042 | 192 | 0.168155529 | 0.002041189 |
| SNP_A.K_288111_2_4988565   | 2  | 4988565  | 1.53E-07 | 0.01042 | 192 | 0.168155529 | 0.002041189 |
| SNP_A.K_288118_2_4988884   | 2  | 4988884  | 1.53E-07 | 0.01042 | 192 | 0.168155529 | 0.002041189 |
| SNP_A.K_288131_2_4990339   | 2  | 4990339  | 1.53E-07 | 0.01042 | 192 | 0.168155529 | 0.002041189 |
| SNP_A.K_288152_2_4992317   | 2  | 4992317  | 1.53E-07 | 0.01042 | 192 | 0.168155529 | 0.002041189 |
| SNP_A.K_288196_2_4997387   | 2  | 4997387  | 1.53E-07 | 0.01042 | 192 | 0.168155529 | 0.002041189 |
| SNP_A.K_288106_2_4988412   | 2  | 4988412  | 1.53E-07 | 0.01042 | 192 | 0.168155529 | 0.002041189 |
| SNP_A.K_288153_2_4992344   | 2  | 4992344  | 1.53E-07 | 0.01042 | 192 | 0.168155529 | 0.002041189 |
| SNP_A.K_288180_2_4994173   | 2  | 4994173  | 1.53E-07 | 0.01042 | 192 | 0.168155529 | 0.002041189 |
| SNP_A.K_288214_2_4998711   | 2  | 4998711  | 1.53E-07 | 0.01042 | 192 | 0.168155529 | 0.002041189 |
| SNP_A.K_726928_4_12057294  | 4  | 12057294 | 1.53E-07 | 0.22396 | 192 | 0.16815213  | 0.002041189 |



|                            |    |          |          |         |     |             |             |
|----------------------------|----|----------|----------|---------|-----|-------------|-------------|
| SNP_A.K_288108_2_4988457   | 2  | 4988457  | 1.54E-07 | 0.01042 | 192 | 0.168130261 | 0.002041189 |
| SNP_A.K_288511_2_5035693   | 2  | 5035693  | 1.56E-07 | 0.01042 | 192 | 0.167926711 | 0.002041189 |
| SNP_A.K_1552865_9_9222655  | 9  | 9222655  | 1.57E-07 | 0.20573 | 192 | 0.167885856 | 0.002041189 |
| SNP_A.K_288583_2_5045331   | 2  | 5045331  | 1.57E-07 | 0.01042 | 192 | 0.167860935 | 0.002041189 |
| SNP_A.K_288713_2_5061585   | 2  | 5061585  | 1.57E-07 | 0.01042 | 192 | 0.167860935 | 0.002041189 |
| SNP_A.K_709177_4_8236729   | 4  | 8236729  | 1.57E-07 | 0.02865 | 192 | 0.167853945 | 0.002041189 |
| SNP_A.K_288121_2_4988997   | 2  | 4988997  | 1.57E-07 | 0.01042 | 192 | 0.167840867 | 0.002041189 |
| SNP_A.K_288166_2_4993376   | 2  | 4993376  | 1.58E-07 | 0.01042 | 192 | 0.167783942 | 0.002041189 |
| SNP_A.K_288186_2_4995030   | 2  | 4995030  | 1.60E-07 | 0.01042 | 192 | 0.167637558 | 0.002041189 |
| SNP_A.K_288187_2_4995034   | 2  | 4995034  | 1.60E-07 | 0.01042 | 192 | 0.167637558 | 0.002041189 |
| SNP_A.K_288138_2_4991416   | 2  | 4991416  | 1.61E-07 | 0.01042 | 192 | 0.167594887 | 0.002041189 |
| SNP_A.K_708911_4_8124310   | 4  | 8124310  | 1.62E-07 | 0.07813 | 192 | 0.167538547 | 0.002041189 |
| SNP_A.K_288307_2_5006319   | 2  | 5006319  | 1.62E-07 | 0.01042 | 192 | 0.167467315 | 0.002041189 |
| SNP_A.K_288212_2_4998626   | 2  | 4998626  | 1.64E-07 | 0.01042 | 192 | 0.167379437 | 0.002041189 |
| SNP_A.K_708869_4_8120145   | 4  | 8120145  | 1.64E-07 | 0.07552 | 192 | 0.167331857 | 0.002041189 |
| SNP_A.K_709740_4_8284561   | 4  | 8284561  | 1.65E-07 | 0.07552 | 192 | 0.167311345 | 0.002041189 |
| SNP_A.K_288140_2_4991514   | 2  | 4991514  | 1.66E-07 | 0.01042 | 192 | 0.167218687 | 0.002041189 |
| SNP_A.K_288185_2_4995012   | 2  | 4995012  | 1.66E-07 | 0.01042 | 192 | 0.167197817 | 0.002041189 |
| SNP_A.K_288341_2_5011285   | 2  | 5011285  | 1.66E-07 | 0.01042 | 192 | 0.167182423 | 0.002041189 |
| SNP_A.K_709069_4_8216219   | 4  | 8216219  | 1.67E-07 | 0.07552 | 192 | 0.167120799 | 0.002041189 |
| SNP_A.K_709114_4_8227467   | 4  | 8227467  | 1.67E-07 | 0.08333 | 192 | 0.167111604 | 0.002041189 |
| SNP_A.K_708815_4_8115069   | 4  | 8115069  | 1.68E-07 | 0.08333 | 192 | 0.167039277 | 0.002041189 |
| SNP_A.K_708574_4_8062246   | 4  | 8062246  | 1.70E-07 | 0.08333 | 192 | 0.166938331 | 0.002041189 |
| SNP_A.K_1552921_9_9224901  | 9  | 9224901  | 1.70E-07 | 0.21615 | 192 | 0.166901486 | 0.002041189 |
| SNP_A.K_709171_4_8236402   | 4  | 8236402  | 1.71E-07 | 0.08333 | 192 | 0.166892615 | 0.002041189 |
| SNP_A.K_730537_4_12698650  | 4  | 12698650 | 1.71E-07 | 0.20573 | 192 | 0.166849437 | 0.002041189 |
| SNP_A.K_709627_4_8278535   | 4  | 8278535  | 1.71E-07 | 0.07552 | 192 | 0.166840211 | 0.002041189 |
| SNP_A.K_709698_4_8282162   | 4  | 8282162  | 1.72E-07 | 0.08333 | 192 | 0.166821933 | 0.002041189 |
| SNP_A.K_724792_4_11681871  | 4  | 11681871 | 1.74E-07 | 0.22135 | 192 | 0.166669976 | 0.002054887 |
| SNP_A.K_708580_4_8062495   | 4  | 8062495  | 1.76E-07 | 0.07552 | 192 | 0.166550973 | 0.002054887 |
| SNP_A.K_1552922_9_9224908  | 9  | 9224908  | 1.76E-07 | 0.21615 | 192 | 0.166542475 | 0.002054887 |
| SNP_A.K_723464_4_11458037  | 4  | 11458037 | 1.78E-07 | 0.21875 | 192 | 0.166423226 | 0.002058082 |
| SNP_A.K_726053_4_11897104  | 4  | 11897104 | 1.78E-07 | 0.22135 | 192 | 0.166392351 | 0.002058082 |
| SNP_A.K_1813026_11_8487695 | 11 | 8487695  | 1.83E-07 | 0.13542 | 192 | 0.166095055 | 0.002091963 |
| SNP_A.K_1552867_9_9222718  | 9  | 9222718  | 1.83E-07 | 0.20052 | 192 | 0.166069487 | 0.002091963 |
| SNP_A.K_730495_4_12696561  | 4  | 12696561 | 1.84E-07 | 0.22135 | 192 | 0.165973231 | 0.002097586 |
| SNP_A.K_1028765_6_10682951 | 6  | 10682951 | 1.88E-07 | 0.02083 | 192 | 0.165730205 | 0.002129642 |
| SNP_A.K_709239_4_8242287   | 4  | 8242287  | 1.92E-07 | 0.07813 | 192 | 0.165519078 | 0.00215592  |
| SNP_A.K_709227_4_8241958   | 4  | 8241958  | 1.93E-07 | 0.07552 | 192 | 0.16545828  | 0.00215592  |
| SNP_A.K_723779_4_11515937  | 4  | 11515937 | 2.11E-07 | 0.22396 | 192 | 0.164405144 | 0.002344994 |
| SNP_A.K_723257_4_11423648  | 4  | 11423648 | 2.18E-07 | 0.25781 | 192 | 0.164007295 | 0.002412731 |
| SNP_A.K_727195_4_12092846  | 4  | 12092846 | 2.19E-07 | 0.21354 | 192 | 0.163938447 | 0.002414052 |
| SNP_A.K_709719_4_8283243   | 4  | 8283243  | 2.22E-07 | 0.08073 | 192 | 0.163774767 | 0.002423456 |
| SNP_A.K_725554_4_11821281  | 4  | 11821281 | 2.22E-07 | 0.17448 | 192 | 0.16376639  | 0.002423456 |
| SNP_A.K_728188_4_12288051  | 4  | 12288051 | 2.24E-07 | 0.22135 | 192 | 0.163702381 | 0.002423456 |
| SNP_A.K_730552_4_12699438  | 4  | 12699438 | 2.25E-07 | 0.19792 | 192 | 0.163646382 | 0.002423456 |
| SNP_A.K_723345_4_11434442  | 4  | 11434442 | 2.27E-07 | 0.22135 | 192 | 0.163546458 | 0.002431538 |
| SNP_A.K_708853_4_8117289   | 4  | 8117289  | 2.32E-07 | 0.08073 | 192 | 0.163294595 | 0.002471448 |
| SNP_A.K_709382_4_8263107   | 4  | 8263107  | 2.36E-07 | 0.07813 | 192 | 0.163090263 | 0.002501955 |
| SNP_A.K_708764_4_8111318   | 4  | 8111318  | 2.38E-07 | 0.08073 | 192 | 0.162960482 | 0.002516896 |

|                             |    |          |          |         |     |             |             |
|-----------------------------|----|----------|----------|---------|-----|-------------|-------------|
| SNP_A.K_725139_4_11740931   | 4  | 11740931 | 2.44E-07 | 0.26302 | 192 | 0.162675312 | 0.002565706 |
| SNP_A.K_709534_4_8272471    | 4  | 8272471  | 2.48E-07 | 0.07813 | 192 | 0.162497344 | 0.002591783 |
| SNP_A.K_253295_1_40881735   | 1  | 40881735 | 2.51E-07 | 0.14844 | 192 | 0.162359188 | 0.002609339 |
| SNP_A.K_1552927_9_9225039   | 9  | 9225039  | 2.57E-07 | 0.20573 | 192 | 0.162057897 | 0.00266384  |
| SNP_A.K_708766_4_8111373    | 4  | 8111373  | 2.61E-07 | 0.08594 | 192 | 0.161871862 | 0.002692994 |
| SNP_A.K_708736_4_8089953    | 4  | 8089953  | 2.63E-07 | 0.07813 | 192 | 0.161777085 | 0.002701455 |
| SNP_A.K_709111_4_8226407    | 4  | 8226407  | 2.72E-07 | 0.08333 | 192 | 0.161395276 | 0.002777121 |
| SNP_A.K_708763_4_8111298    | 4  | 8111298  | 2.74E-07 | 0.07813 | 192 | 0.16130778  | 0.002784263 |
| SNP_A.K_723460_4_11457805   | 4  | 11457805 | 2.77E-07 | 0.21094 | 192 | 0.161181122 | 0.002800828 |
| SNP_A.K_709426_4_8265823    | 4  | 8265823  | 2.79E-07 | 0.11458 | 192 | 0.16108772  | 0.002809584 |
| SNP_A.K_726174_4_11926870   | 4  | 11926870 | 2.87E-07 | 0.10677 | 192 | 0.160785916 | 0.002868977 |
| SNP_A.K_709200_4_8238535    | 4  | 8238535  | 2.89E-07 | 0.0625  | 192 | 0.160711343 | 0.00287347  |
| SNP_A.K_1552876_9_9223555   | 9  | 9223555  | 2.96E-07 | 0.20313 | 192 | 0.160425267 | 0.002930444 |
| SNP_A.K_1815425_11_8851660  | 11 | 8851660  | 2.98E-07 | 0.14323 | 192 | 0.160326649 | 0.002941203 |
| SNP_A.K_725249_4_11767161   | 4  | 11767161 | 3.05E-07 | 0.21875 | 192 | 0.160047912 | 0.002997807 |
| SNP_A.K_709665_4_8279691    | 4  | 8279691  | 3.17E-07 | 0.22135 | 192 | 0.159608701 | 0.003097753 |
| SNP_A.K_724241_4_11583139   | 4  | 11583139 | 3.24E-07 | 0.11198 | 192 | 0.159357484 | 0.003150154 |
| SNP_A.K_730550_4_12699355   | 4  | 12699355 | 3.29E-07 | 0.20313 | 192 | 0.159166856 | 0.003184067 |
| SNP_A.K_1953652_12_3611028  | 12 | 3611028  | 3.30E-07 | 0.08333 | 192 | 0.15912328  | 0.003184067 |
| SNP_A.K_709737_4_8284482    | 4  | 8284482  | 3.41E-07 | 0.08073 | 192 | 0.158751375 | 0.003271753 |
| SNP_A.K_1815428_11_8851722  | 11 | 8851722  | 3.45E-07 | 0.15104 | 192 | 0.158632163 | 0.003290106 |
| SNP_A.K_708902_4_8122881    | 4  | 8122881  | 3.48E-07 | 0.08073 | 192 | 0.158527658 | 0.003304477 |
| SNP_A.K_709738_4_8284489    | 4  | 8284489  | 3.55E-07 | 0.08073 | 192 | 0.158271901 | 0.003362196 |
| SNP_A.K_1552894_9_9224143   | 9  | 9224143  | 3.62E-07 | 0.21354 | 192 | 0.158047692 | 0.003411793 |
| SNP_A.K_1813663_11_8564877  | 11 | 8564877  | 3.68E-07 | 0.14063 | 192 | 0.15785987  | 0.003444294 |
| SNP_A.K_1552953_9_9225791   | 9  | 9225791  | 3.69E-07 | 0.20833 | 192 | 0.157823402 | 0.003444294 |
| SNP_A.K_710508_4_8425491    | 4  | 8425491  | 3.71E-07 | 0.08594 | 192 | 0.1577793   | 0.003444294 |
| SNP_A.K_1552878_9_9223677   | 9  | 9223677  | 3.76E-07 | 0.20833 | 192 | 0.157613642 | 0.003477947 |
| SNP_A.K_1552935_9_9225150   | 9  | 9225150  | 3.79E-07 | 0.21094 | 192 | 0.157504879 | 0.003484237 |
| SNP_A.K_730535_4_12698463   | 4  | 12698463 | 3.80E-07 | 0.20833 | 192 | 0.157489147 | 0.003484237 |
| SNP_A.K_1552920_9_9224844   | 9  | 9224844  | 3.97E-07 | 0.21354 | 192 | 0.156980299 | 0.003611979 |
| SNP_A.K_1815426_11_8851679  | 11 | 8851679  | 3.97E-07 | 0.15365 | 192 | 0.1569662   | 0.003611979 |
| SNP_A.K_708834_4_8115542    | 4  | 8115542  | 3.99E-07 | 0.08594 | 192 | 0.156904646 | 0.003615285 |
| SNP_A.K_709282_4_8245664    | 4  | 8245664  | 4.08E-07 | 0.08594 | 192 | 0.156646602 | 0.003680097 |
| SNP_A.K_708733_4_8089817    | 4  | 8089817  | 4.26E-07 | 0.08073 | 192 | 0.156154365 | 0.003803738 |
| SNP_A.K_708765_4_8111323    | 4  | 8111323  | 4.27E-07 | 0.08073 | 192 | 0.156132996 | 0.003803738 |
| SNP_A.K_709228_4_8241962    | 4  | 8241962  | 4.28E-07 | 0.08073 | 192 | 0.156110492 | 0.003803738 |
| SNP_A.K_708830_4_8115387    | 4  | 8115387  | 4.35E-07 | 0.08073 | 192 | 0.155903938 | 0.003851781 |
| SNP_A.K_1552923_9_9224924   | 9  | 9224924  | 4.39E-07 | 0.20573 | 192 | 0.155810635 | 0.003851781 |
| SNP_A.K_724233_4_11582596   | 4  | 11582596 | 4.42E-07 | 0.13021 | 192 | 0.155721576 | 0.003851781 |
| SNP_A.K_709556_4_8273703    | 4  | 8273703  | 4.42E-07 | 0.08594 | 192 | 0.15571795  | 0.003851781 |
| SNP_A.K_1813673_11_8565241  | 11 | 8565241  | 4.42E-07 | 0.15625 | 192 | 0.155717567 | 0.003851781 |
| SNP_A.K_1487409_8_26904720  | 8  | 26904720 | 4.46E-07 | 0.01823 | 192 | 0.155609772 | 0.003871362 |
| SNP_A.K_709046_4_8214906    | 4  | 8214906  | 4.51E-07 | 0.08073 | 192 | 0.155486637 | 0.003884706 |
| SNP_A.K_1175143_7_1827317   | 7  | 1827317  | 4.53E-07 | 0.04167 | 192 | 0.155435542 | 0.003884706 |
| SNP_A.K_1552871_9_9222892   | 9  | 9222892  | 4.54E-07 | 0.20833 | 192 | 0.155424858 | 0.003884706 |
| SNP_A.K_709027_4_8213731    | 4  | 8213731  | 4.60E-07 | 0.08073 | 192 | 0.155248922 | 0.003922582 |
| SNP_A.K_708973_4_8211776    | 4  | 8211776  | 4.62E-07 | 0.08594 | 192 | 0.155216255 | 0.003922582 |
| SNP_A.K_2023179_12_15535035 | 12 | 15535035 | 4.65E-07 | 0.09635 | 192 | 0.155141153 | 0.003931898 |
| SNP_A.K_709693_4_8281558    | 4  | 8281558  | 4.71E-07 | 0.08854 | 192 | 0.154988463 | 0.003967638 |

|                            |   |          |          |         |     |             |             |
|----------------------------|---|----------|----------|---------|-----|-------------|-------------|
| SNP_A.K_709557_4_8273707   | 4 | 8273707  | 4.74E-07 | 0.08594 | 192 | 0.154922056 | 0.00397423  |
| SNP_A.K_725782_4_11865314  | 4 | 11865314 | 4.84E-07 | 0.18229 | 192 | 0.154671435 | 0.004044365 |
| SNP_A.K_1551668_9_9119953  | 9 | 9119953  | 4.91E-07 | 0.33594 | 192 | 0.154495708 | 0.004089437 |
| SNP_A.K_710534_4_8426668   | 4 | 8426668  | 4.93E-07 | 0.08333 | 192 | 0.154444535 | 0.004091086 |
| SNP_A.K_709124_4_8231016   | 4 | 8231016  | 5.13E-07 | 0.08333 | 192 | 0.15399812  | 0.004234167 |
| SNP_A.K_940970_5_22811089  | 5 | 22811089 | 5.18E-07 | 0.02604 | 192 | 0.153876746 | 0.004261652 |
| SNP_A.K_1552392_9_9174341  | 9 | 9174341  | 5.24E-07 | 0.15625 | 192 | 0.15373881  | 0.0042955   |
| SNP_A.K_724243_4_11583164  | 4 | 11583164 | 5.30E-07 | 0.11979 | 192 | 0.153612046 | 0.004319163 |
| SNP_A.K_1028761_6_10682850 | 6 | 10682850 | 5.31E-07 | 0.02344 | 192 | 0.153582283 | 0.004319163 |
| SNP_A.K_1552847_9_9222219  | 9 | 9222219  | 5.35E-07 | 0.21354 | 192 | 0.153505553 | 0.004319163 |
| SNP_A.K_708863_4_8118805   | 4 | 8118805  | 5.35E-07 | 0.09115 | 192 | 0.153493153 | 0.004319163 |
| SNP_A.K_709092_4_8222010   | 4 | 8222010  | 5.45E-07 | 0.08594 | 192 | 0.153282072 | 0.004381294 |
| SNP_A.K_724334_4_11588870  | 4 | 11588870 | 5.70E-07 | 0.1276  | 192 | 0.152763051 | 0.004555473 |
| SNP_A.K_288401_2_5021522   | 2 | 5021522  | 5.72E-07 | 0.01302 | 192 | 0.152723179 | 0.004555473 |
| SNP_A.K_709017_4_8212961   | 4 | 8212961  | 5.75E-07 | 0.08594 | 192 | 0.15266348  | 0.004555473 |
| SNP_A.K_1028692_6_10679118 | 6 | 10679118 | 5.76E-07 | 0.02344 | 192 | 0.152650777 | 0.004555473 |
| SNP_A.K_1028707_6_10680163 | 6 | 10680163 | 5.80E-07 | 0.02344 | 192 | 0.152562927 | 0.004572661 |
| SNP_A.K_709105_4_8224626   | 4 | 8224626  | 5.85E-07 | 0.08333 | 192 | 0.152468023 | 0.004585208 |
| SNP_A.K_1551737_9_9124097  | 9 | 9124097  | 5.86E-07 | 0.28385 | 192 | 0.152443411 | 0.004585208 |
| SNP_A.K_1551753_9_9124517  | 9 | 9124517  | 5.93E-07 | 0.28385 | 192 | 0.152313221 | 0.00461952  |
| SNP_A.K_1552946_9_9225741  | 9 | 9225741  | 6.00E-07 | 0.20833 | 192 | 0.152176045 | 0.004656963 |
| SNP_A.K_729015_4_12427666  | 4 | 12427666 | 6.14E-07 | 0.24479 | 192 | 0.151901047 | 0.004750842 |
| SNP_A.K_709409_4_8265347   | 4 | 8265347  | 6.22E-07 | 0.08333 | 192 | 0.151757706 | 0.004784878 |
| SNP_A.K_708972_4_8211753   | 4 | 8211753  | 6.23E-07 | 0.09115 | 192 | 0.151732186 | 0.004784878 |
| SNP_A.K_1552957_9_9226039  | 9 | 9226039  | 6.36E-07 | 0.24479 | 192 | 0.151495948 | 0.004832091 |
| SNP_A.K_708821_4_8115237   | 4 | 8115237  | 6.37E-07 | 0.08333 | 192 | 0.15147354  | 0.004832091 |
| SNP_A.K_1551752_9_9124501  | 9 | 9124501  | 6.41E-07 | 0.28906 | 192 | 0.151396045 | 0.004832091 |
| SNP_A.K_726909_4_12056420  | 4 | 12056420 | 6.41E-07 | 0.22917 | 192 | 0.151394474 | 0.004832091 |
| SNP_A.K_708587_4_8062950   | 4 | 8062950  | 6.42E-07 | 0.08594 | 192 | 0.151387077 | 0.004832091 |
| SNP_A.K_708833_4_8115517   | 4 | 8115517  | 6.43E-07 | 0.08333 | 192 | 0.151364096 | 0.004832091 |
| SNP_A.K_730534_4_12698429  | 4 | 12698429 | 6.53E-07 | 0.21094 | 192 | 0.151193773 | 0.004885914 |
| SNP_A.K_709115_4_8227722   | 4 | 8227722  | 6.57E-07 | 0.09115 | 192 | 0.151108988 | 0.004904115 |
| SNP_A.K_686026_4_2522606   | 4 | 2522606  | 6.76E-07 | 0.08073 | 192 | 0.150779962 | 0.005027221 |
| SNP_A.K_709554_4_8273677   | 4 | 8273677  | 7.00E-07 | 0.08854 | 192 | 0.150380465 | 0.005174339 |
| SNP_A.K_729300_4_12590909  | 4 | 12590909 | 7.01E-07 | 0.22135 | 192 | 0.150363071 | 0.005174339 |
| SNP_A.K_709116_4_8227885   | 4 | 8227885  | 7.04E-07 | 0.09115 | 192 | 0.150318661 | 0.00517585  |
| SNP_A.K_709281_4_8245647   | 4 | 8245647  | 7.14E-07 | 0.1224  | 192 | 0.1501572   | 0.00522999  |
| SNP_A.K_709463_4_8267868   | 4 | 8267868  | 7.17E-07 | 0.09115 | 192 | 0.150106525 | 0.005234483 |
| SNP_A.K_708912_4_8124548   | 4 | 8124548  | 7.33E-07 | 0.08854 | 192 | 0.149846085 | 0.005334773 |
| SNP_A.K_1551904_9_9131739  | 9 | 9131739  | 7.48E-07 | 0.28125 | 192 | 0.149606301 | 0.005427398 |
| SNP_A.K_724300_4_11587032  | 4 | 11587032 | 7.57E-07 | 0.11979 | 192 | 0.14947625  | 0.005463958 |
| SNP_A.K_709036_4_8214282   | 4 | 8214282  | 7.59E-07 | 0.08594 | 192 | 0.149448154 | 0.005463958 |
| SNP_A.K_708813_4_8115020   | 4 | 8115020  | 7.69E-07 | 0.08594 | 192 | 0.149284813 | 0.005522487 |
| SNP_A.K_1552913_9_9224737  | 9 | 9224737  | 7.74E-07 | 0.20833 | 192 | 0.14921981  | 0.005534502 |
| SNP_A.K_1552940_9_9225513  | 9 | 9225513  | 7.81E-07 | 0.21354 | 192 | 0.149110857 | 0.005567713 |
| SNP_A.K_708554_4_8061283   | 4 | 8061283  | 7.94E-07 | 0.08594 | 192 | 0.148923438 | 0.005619941 |
| SNP_A.K_708814_4_8115034   | 4 | 8115034  | 7.95E-07 | 0.09375 | 192 | 0.14890824  | 0.005619941 |
| SNP_A.K_708822_4_8115248   | 4 | 8115248  | 7.96E-07 | 0.08594 | 192 | 0.148884525 | 0.005619941 |
| SNP_A.K_709739_4_8284495   | 4 | 8284495  | 8.01E-07 | 0.08854 | 192 | 0.148824625 | 0.005630027 |
| SNP_A.K_709084_4_8219294   | 4 | 8219294  | 8.05E-07 | 0.09635 | 192 | 0.148757145 | 0.005643893 |

|                            |    |          |          |         |     |             |             |
|----------------------------|----|----------|----------|---------|-----|-------------|-------------|
| SNP_A.K_1551709_9_9122364  | 9  | 9122364  | 8.16E-07 | 0.17448 | 192 | 0.148604107 | 0.005686099 |
| SNP_A.K_708753_4_8111008   | 4  | 8111008  | 8.21E-07 | 0.09375 | 192 | 0.148540711 | 0.005686099 |
| SNP_A.K_1487790_8_26983558 | 8  | 26983558 | 8.21E-07 | 0.03646 | 192 | 0.148529379 | 0.005686099 |
| SNP_A.K_709566_4_8273973   | 4  | 8273973  | 8.22E-07 | 0.08854 | 192 | 0.148516213 | 0.005686099 |
| SNP_A.K_1813029_11_8488078 | 11 | 8488078  | 8.30E-07 | 0.14323 | 192 | 0.148403312 | 0.005722867 |
| SNP_A.K_708594_4_8063331   | 4  | 8063331  | 8.36E-07 | 0.08854 | 192 | 0.148319068 | 0.005745686 |
| SNP_A.K_725605_4_11823655  | 4  | 11823655 | 8.50E-07 | 0.17969 | 192 | 0.148131975 | 0.005820208 |
| SNP_A.K_1552892_9_9224033  | 9  | 9224033  | 8.67E-07 | 0.21615 | 192 | 0.147902143 | 0.00591523  |
| SNP_A.K_288383_2_5018846   | 2  | 5018846  | 8.72E-07 | 0.01302 | 192 | 0.14784059  | 0.00591523  |
| SNP_A.K_1813733_11_8574694 | 11 | 8574694  | 8.74E-07 | 0.14323 | 192 | 0.147807447 | 0.00591523  |
| SNP_A.K_709290_4_8246220   | 4  | 8246220  | 8.75E-07 | 0.19531 | 192 | 0.147793696 | 0.00591523  |
| SNP_A.K_288137_2_4991246   | 2  | 4991246  | 8.81E-07 | 0.01302 | 192 | 0.147713739 | 0.005937024 |
| SNP_A.K_1552929_9_9225079  | 9  | 9225079  | 8.98E-07 | 0.21354 | 192 | 0.147496196 | 0.005995159 |
| SNP_A.K_709346_4_8250325   | 4  | 8250325  | 9.00E-07 | 0.09115 | 192 | 0.147471184 | 0.005995159 |
| SNP_A.K_288314_2_5007783   | 2  | 5007783  | 9.04E-07 | 0.01302 | 192 | 0.147423859 | 0.005995159 |
| SNP_A.K_724994_4_11719940  | 4  | 11719940 | 9.04E-07 | 0.22656 | 192 | 0.147420272 | 0.005995159 |
| SNP_A.K_708642_4_8069500   | 4  | 8069500  | 9.07E-07 | 0.20573 | 192 | 0.147386919 | 0.005995159 |
| SNP_A.K_686028_4_2522613   | 4  | 2522613  | 9.07E-07 | 0.08333 | 192 | 0.147378979 | 0.005995159 |
| SNP_A.K_288215_2_4998717   | 2  | 4998717  | 9.10E-07 | 0.01302 | 192 | 0.147341111 | 0.005995812 |
| SNP_A.K_1814804_11_8776880 | 11 | 8776880  | 9.18E-07 | 0.13281 | 192 | 0.14724836  | 0.006025088 |
| SNP_A.K_709280_4_8245645   | 4  | 8245645  | 9.40E-07 | 0.125   | 192 | 0.146974663 | 0.006150199 |
| SNP_A.K_693760_4_5059626   | 4  | 5059626  | 9.52E-07 | 0.08333 | 192 | 0.146818104 | 0.006214628 |
| SNP_A.K_693646_4_5045827   | 4  | 5045827  | 9.76E-07 | 0.04688 | 192 | 0.146538381 | 0.006347187 |
| SNP_A.K_288115_2_4988802   | 2  | 4988802  | 1.00E-06 | 0.01302 | 192 | 0.146251399 | 0.006486766 |
| SNP_A.K_288117_2_4988837   | 2  | 4988837  | 1.01E-06 | 0.01302 | 192 | 0.146176586 | 0.006508696 |
| SNP_A.K_724527_4_11613406  | 4  | 11613406 | 1.02E-06 | 0.08073 | 192 | 0.146058387 | 0.006555378 |
| SNP_A.K_728967_4_12421929  | 4  | 12421929 | 1.03E-06 | 0.22396 | 192 | 0.14595941  | 0.006591472 |
| SNP_A.K_1487792_8_26983656 | 8  | 26983656 | 1.03E-06 | 0.04427 | 192 | 0.145861174 | 0.006609523 |
| SNP_A.K_1815427_11_8851705 | 11 | 8851705  | 1.04E-06 | 0.15885 | 192 | 0.14585691  | 0.006609523 |
| SNP_A.K_288188_2_4995116   | 2  | 4995116  | 1.04E-06 | 0.01302 | 192 | 0.145812749 | 0.006614594 |
| SNP_A.K_730551_4_12699428  | 4  | 12699428 | 1.05E-06 | 0.20052 | 192 | 0.145688221 | 0.006650712 |
| SNP_A.K_731705_4_13199434  | 4  | 13199434 | 1.05E-06 | 0.01823 | 192 | 0.145679663 | 0.006650712 |
| SNP_A.K_1815418_11_8851377 | 11 | 8851377  | 1.08E-06 | 0.15365 | 192 | 0.145415472 | 0.006784282 |
| SNP_A.K_708974_4_8211787   | 4  | 8211787  | 1.11E-06 | 0.09115 | 192 | 0.1450924   | 0.006956106 |
| SNP_A.K_708548_4_8061131   | 4  | 8061131  | 1.13E-06 | 0.20052 | 192 | 0.144827025 | 0.007096778 |
| SNP_A.K_724319_4_11588460  | 4  | 11588460 | 1.15E-06 | 0.1276  | 192 | 0.14463423  | 0.007156991 |
| SNP_A.K_288179_2_4994059   | 2  | 4994059  | 1.15E-06 | 0.01302 | 192 | 0.144608548 | 0.007156991 |
| SNP_A.K_698302_4_5662955   | 4  | 5662955  | 1.15E-06 | 0.02865 | 192 | 0.144608327 | 0.007156991 |
| SNP_A.K_1028724_6_10681142 | 6  | 10681142 | 1.16E-06 | 0.02604 | 192 | 0.144584819 | 0.007156991 |
| SNP_A.K_1028188_6_10584217 | 6  | 10584217 | 1.16E-06 | 0.02344 | 192 | 0.144557595 | 0.007156991 |
| SNP_A.K_1552896_9_9224257  | 9  | 9224257  | 1.17E-06 | 0.21094 | 192 | 0.144493722 | 0.007167105 |
| SNP_A.K_709049_4_8215210   | 4  | 8215210  | 1.17E-06 | 0.09635 | 192 | 0.14447321  | 0.007167105 |
| SNP_A.K_709425_4_8265815   | 4  | 8265815  | 1.18E-06 | 0.09375 | 192 | 0.144369631 | 0.007210612 |
| SNP_A.K_288134_2_4990664   | 2  | 4990664  | 1.18E-06 | 0.01302 | 192 | 0.144321365 | 0.007219675 |
| SNP_A.K_288469_2_5032381   | 2  | 5032381  | 1.20E-06 | 0.01302 | 192 | 0.14415514  | 0.007303283 |
| SNP_A.K_729016_4_12427674  | 4  | 12427674 | 1.21E-06 | 0.25    | 192 | 0.144034787 | 0.007358548 |
| SNP_A.K_288175_2_4993980   | 2  | 4993980  | 1.24E-06 | 0.01302 | 192 | 0.143790362 | 0.007472974 |
| SNP_A.K_288174_2_4993961   | 2  | 4993961  | 1.24E-06 | 0.01302 | 192 | 0.143790362 | 0.007472974 |
| SNP_A.K_278117_2_3027954   | 2  | 3027954  | 1.25E-06 | 0.0651  | 192 | 0.14369332  | 0.007509867 |
| SNP_A.K_1552907_9_9224464  | 9  | 9224464  | 1.25E-06 | 0.21615 | 192 | 0.143667222 | 0.007509867 |

|                             |    |          |          |         |     |             |             |
|-----------------------------|----|----------|----------|---------|-----|-------------|-------------|
| SNP_A.K_709112_4_8226414    | 4  | 8226414  | 1.28E-06 | 0.09375 | 192 | 0.143390722 | 0.007670509 |
| SNP_A.K_726215_4_11929224   | 4  | 11929224 | 1.29E-06 | 0.22396 | 192 | 0.14333708  | 0.007680404 |
| SNP_A.K_725217_4_11763173   | 4  | 11763173 | 1.29E-06 | 0.25    | 192 | 0.143310008 | 0.007680404 |
| SNP_A.K_1813515_11_8543843  | 11 | 8543843  | 1.30E-06 | 0.14583 | 192 | 0.143207755 | 0.007698152 |
| SNP_A.K_708599_4_8063460    | 4  | 8063460  | 1.30E-06 | 0.08854 | 192 | 0.143198016 | 0.007698152 |
| SNP_A.K_710525_4_8426312    | 4  | 8426312  | 1.31E-06 | 0.09115 | 192 | 0.143158267 | 0.007698152 |
| SNP_A.K_729013_4_12427498   | 4  | 12427498 | 1.31E-06 | 0.2526  | 192 | 0.143152831 | 0.007698152 |
| SNP_A.K_708598_4_8063409    | 4  | 8063409  | 1.32E-06 | 0.09375 | 192 | 0.143053697 | 0.007703612 |
| SNP_A.K_1815448_11_8852393  | 11 | 8852393  | 1.32E-06 | 0.14583 | 192 | 0.143048936 | 0.007703612 |
| SNP_A.K_709555_4_8273679    | 4  | 8273679  | 1.33E-06 | 0.08854 | 192 | 0.142992417 | 0.007703612 |
| SNP_A.K_709294_4_8246409    | 4  | 8246409  | 1.33E-06 | 0.13802 | 192 | 0.142970423 | 0.007703612 |
| SNP_A.K_363696_2_16460925   | 2  | 16460925 | 1.33E-06 | 0.10938 | 192 | 0.142953394 | 0.007703612 |
| SNP_A.K_730516_4_12697714   | 4  | 12697714 | 1.33E-06 | 0.21094 | 192 | 0.142951501 | 0.007703612 |
| SNP_A.K_729055_4_12506050   | 4  | 12506050 | 1.35E-06 | 0.20833 | 192 | 0.142832186 | 0.007747072 |
| SNP_A.K_1552937_9_9225382   | 9  | 9225382  | 1.35E-06 | 0.22135 | 192 | 0.142766708 | 0.007747072 |
| SNP_A.K_709289_4_8245934    | 4  | 8245934  | 1.35E-06 | 0.10677 | 192 | 0.142761083 | 0.007747072 |
| SNP_A.K_288109_2_4988475    | 2  | 4988475  | 1.36E-06 | 0.01302 | 192 | 0.142730925 | 0.007747072 |
| SNP_A.K_1487782_8_26983036  | 8  | 26983036 | 1.36E-06 | 0.03906 | 192 | 0.14269692  | 0.007747072 |
| SNP_A.K_1487789_8_26983445  | 8  | 26983445 | 1.36E-06 | 0.03906 | 192 | 0.14269692  | 0.007747072 |
| SNP_A.K_288151_2_4992282    | 2  | 4992282  | 1.39E-06 | 0.01302 | 192 | 0.142473968 | 0.007877371 |
| SNP_A.K_1028760_6_10682840  | 6  | 10682840 | 1.40E-06 | 0.02604 | 192 | 0.142379868 | 0.007920591 |
| SNP_A.K_288714_2_5061588    | 2  | 5061588  | 1.41E-06 | 0.01302 | 192 | 0.142315412 | 0.00793863  |
| SNP_A.K_708595_4_8063346    | 4  | 8063346  | 1.41E-06 | 0.09375 | 192 | 0.142291496 | 0.00793863  |
| SNP_A.K_288209_2_4998353    | 2  | 4998353  | 1.42E-06 | 0.01302 | 192 | 0.142199275 | 0.00798107  |
| SNP_A.K_1698635_10_12921082 | 10 | 12921082 | 1.44E-06 | 0.17708 | 192 | 0.142079268 | 0.008043245 |
| SNP_A.K_288107_2_4988418    | 2  | 4988418  | 1.44E-06 | 0.01302 | 192 | 0.142032058 | 0.008054735 |
| SNP_A.K_1487785_8_26983139  | 8  | 26983139 | 1.46E-06 | 0.03906 | 192 | 0.1419311   | 0.008104157 |
| SNP_A.K_708832_4_8115505    | 4  | 8115505  | 1.46E-06 | 0.08854 | 192 | 0.141876071 | 0.008119178 |
| SNP_A.K_288462_2_5031896    | 2  | 5031896  | 1.47E-06 | 0.01302 | 192 | 0.141832144 | 0.008119178 |
| SNP_A.K_708596_4_8063402    | 4  | 8063402  | 1.47E-06 | 0.10156 | 192 | 0.1418144   | 0.008119178 |
| SNP_A.K_708004_4_7494976    | 4  | 7494976  | 1.47E-06 | 0.22135 | 192 | 0.141787736 | 0.008119178 |
| SNP_A.K_1028764_6_10682948  | 6  | 10682948 | 1.49E-06 | 0.02604 | 192 | 0.141632358 | 0.008204026 |
| SNP_A.K_1552269_9_9164344   | 9  | 9164344  | 1.50E-06 | 0.21615 | 192 | 0.141607871 | 0.008204026 |
| SNP_A.K_288538_2_5037464    | 2  | 5037464  | 1.52E-06 | 0.01302 | 192 | 0.141459606 | 0.008288914 |
| SNP_A.K_1552933_9_9225119   | 9  | 9225119  | 1.54E-06 | 0.21615 | 192 | 0.141311309 | 0.008374779 |
| SNP_A.K_1487784_8_26983106  | 8  | 26983106 | 1.56E-06 | 0.04427 | 192 | 0.14113221  | 0.008484367 |
| SNP_A.K_288304_2_5005747    | 2  | 5005747  | 1.59E-06 | 0.01563 | 192 | 0.140909248 | 0.008628421 |
| SNP_A.K_709267_4_8244898    | 4  | 8244898  | 1.61E-06 | 0.21094 | 192 | 0.140770432 | 0.008710847 |
| SNP_A.K_1763047_10_21616432 | 10 | 21616432 | 1.62E-06 | 0.20833 | 192 | 0.140691774 | 0.008726412 |
| SNP_A.K_253412_1_40888392   | 1  | 40888392 | 1.62E-06 | 0.13281 | 192 | 0.140690573 | 0.008726412 |
| SNP_A.K_1027131_6_10364196  | 6  | 10364196 | 1.66E-06 | 0.01302 | 192 | 0.140442345 | 0.008894491 |
| SNP_A.K_725790_4_11865823   | 4  | 11865823 | 1.67E-06 | 0.17708 | 192 | 0.140390137 | 0.008912139 |
| SNP_A.K_1552887_9_9223868   | 9  | 9223868  | 1.68E-06 | 0.22396 | 192 | 0.140313374 | 0.008949041 |
| SNP_A.K_1552910_9_9224624   | 9  | 9224624  | 1.69E-06 | 0.22135 | 192 | 0.140211462 | 0.009004423 |
| SNP_A.K_709596_4_8277494    | 4  | 8277494  | 1.70E-06 | 0.23177 | 192 | 0.140158    | 0.009004423 |
| SNP_A.K_1552879_9_9223690   | 9  | 9223690  | 1.70E-06 | 0.22396 | 192 | 0.140154903 | 0.009004423 |
| SNP_A.K_1552863_9_9222619   | 9  | 9222619  | 1.73E-06 | 0.23438 | 192 | 0.139961928 | 0.009134168 |
| SNP_A.K_730553_4_12699446   | 4  | 12699446 | 1.74E-06 | 0.20313 | 192 | 0.139859391 | 0.009192986 |
| SNP_A.K_724242_4_11583159   | 4  | 11583159 | 1.79E-06 | 0.1276  | 192 | 0.13954017  | 0.009429032 |
| SNP_A.K_1552864_9_9222626   | 9  | 9222626  | 1.82E-06 | 0.23177 | 192 | 0.139367981 | 0.009547839 |

|                            |    |          |          |         |     |             |             |
|----------------------------|----|----------|----------|---------|-----|-------------|-------------|
| SNP_A.K_709288_4_8245927   | 4  | 8245927  | 1.88E-06 | 0.10417 | 192 | 0.139015125 | 0.009814931 |
| SNP_A.K_1552944_9_9225672  | 9  | 9225672  | 1.88E-06 | 0.25781 | 192 | 0.138994784 | 0.009814931 |
| SNP_A.K_709399_4_8265050   | 4  | 8265050  | 1.90E-06 | 0.09896 | 192 | 0.138864347 | 0.009902671 |
| SNP_A.K_708940_4_8150849   | 4  | 8150849  | 1.93E-06 | 0.16667 | 192 | 0.138712338 | 0.010010138 |
| SNP_A.K_724762_4_11676549  | 4  | 11676549 | 1.93E-06 | 0.23698 | 192 | 0.13867698  | 0.010016158 |
| SNP_A.K_728941_4_12410616  | 4  | 12410616 | 1.95E-06 | 0.22135 | 192 | 0.138583375 | 0.010073426 |
| SNP_A.K_1813989_11_8594000 | 11 | 8594000  | 1.98E-06 | 0.15365 | 192 | 0.13839159  | 0.010217991 |
| SNP_A.K_708597_4_8063404   | 4  | 8063404  | 1.99E-06 | 0.09635 | 192 | 0.138363867 | 0.010217991 |
| SNP_A.K_709283_4_8245671   | 4  | 8245671  | 2.01E-06 | 0.08854 | 192 | 0.138261222 | 0.010284764 |
| SNP_A.K_1815447_11_8852386 | 11 | 8852386  | 2.01E-06 | 0.14844 | 192 | 0.138213628 | 0.010302304 |
| SNP_A.K_1953659_12_3611869 | 12 | 3611869  | 2.03E-06 | 0.09375 | 192 | 0.138121982 | 0.010335602 |
| SNP_A.K_1815436_11_8851973 | 11 | 8851973  | 2.03E-06 | 0.14844 | 192 | 0.138120724 | 0.010335602 |
| SNP_A.K_1815446_11_8852379 | 11 | 8852379  | 2.04E-06 | 0.14844 | 192 | 0.138088272 | 0.010339714 |
| SNP_A.K_1815453_11_8852501 | 11 | 8852501  | 2.06E-06 | 0.14323 | 192 | 0.137970213 | 0.010421674 |
| SNP_A.K_1552095_9_9145397  | 9  | 9145397  | 2.07E-06 | 0.33333 | 192 | 0.137878495 | 0.010480171 |
| SNP_A.K_724200_4_11579766  | 4  | 11579766 | 2.09E-06 | 0.13021 | 192 | 0.137777797 | 0.010547196 |
| SNP_A.K_724463_4_11601086  | 4  | 11601086 | 2.10E-06 | 0.1875  | 192 | 0.137718009 | 0.010565996 |
| SNP_A.K_709731_4_8284154   | 4  | 8284154  | 2.11E-06 | 0.09635 | 192 | 0.137702442 | 0.010565996 |
| SNP_A.K_709626_4_8278533   | 4  | 8278533  | 2.14E-06 | 0.23177 | 192 | 0.137541927 | 0.01065285  |
| SNP_A.K_1552951_9_9225776  | 9  | 9225776  | 2.14E-06 | 0.25521 | 192 | 0.137538035 | 0.01065285  |
| SNP_A.K_134461_1_19249290  | 1  | 19249290 | 2.14E-06 | 0.02865 | 192 | 0.137499986 | 0.01065285  |
| SNP_A.K_1552928_9_9225076  | 9  | 9225076  | 2.15E-06 | 0.2474  | 192 | 0.13748724  | 0.01065285  |
| SNP_A.K_1815417_11_8851360 | 11 | 8851360  | 2.15E-06 | 0.16146 | 192 | 0.137472163 | 0.01065285  |
| SNP_A.K_730465_4_12694910  | 4  | 12694910 | 2.24E-06 | 0.20313 | 192 | 0.137013187 | 0.011063511 |
| SNP_A.K_1028783_6_10683434 | 6  | 10683434 | 2.25E-06 | 0.02865 | 192 | 0.136966865 | 0.011082183 |
| SNP_A.K_685401_4_2467389   | 4  | 2467389  | 2.27E-06 | 0.03385 | 192 | 0.136871107 | 0.011149144 |
| SNP_A.K_1028712_6_10680306 | 6  | 10680306 | 2.32E-06 | 0.02865 | 192 | 0.136606129 | 0.011384191 |
| SNP_A.K_1551787_9_9126244  | 9  | 9126244  | 2.33E-06 | 0.32031 | 192 | 0.136565231 | 0.011398196 |
| SNP_A.K_709730_4_8284150   | 4  | 8284150  | 2.34E-06 | 0.09896 | 192 | 0.136513694 | 0.011422932 |
| SNP_A.K_709238_4_8242278   | 4  | 8242278  | 2.39E-06 | 0.20573 | 192 | 0.136245769 | 0.011667073 |
| SNP_A.K_372682_2_17460818  | 2  | 17460818 | 2.41E-06 | 0.01563 | 192 | 0.136176695 | 0.011710539 |
| SNP_A.K_1815132_11_8806510 | 11 | 8806510  | 2.42E-06 | 0.13021 | 192 | 0.136116452 | 0.011745136 |
| SNP_A.K_418958_2_24508877  | 2  | 24508877 | 2.44E-06 | 0.04427 | 192 | 0.136012253 | 0.011825411 |
| SNP_A.K_334565_2_11211324  | 2  | 11211324 | 2.46E-06 | 0.01563 | 192 | 0.135950848 | 0.011854356 |
| SNP_A.K_1552952_9_9225783  | 9  | 9225783  | 2.46E-06 | 0.25781 | 192 | 0.135931488 | 0.011854356 |
| SNP_A.K_728197_4_12288860  | 4  | 12288860 | 2.52E-06 | 0.22656 | 192 | 0.135667371 | 0.012104264 |
| SNP_A.K_1552918_9_9224829  | 9  | 9224829  | 2.53E-06 | 0.22656 | 192 | 0.135615513 | 0.012131458 |
| SNP_A.K_1552899_9_9224344  | 9  | 9224344  | 2.55E-06 | 0.23698 | 192 | 0.135538722 | 0.01218542  |
| SNP_A.K_1815486_11_8853479 | 11 | 8853479  | 2.61E-06 | 0.14844 | 192 | 0.135279585 | 0.012437198 |
| SNP_A.K_710409_4_8348757   | 4  | 8348757  | 2.64E-06 | 0.10417 | 192 | 0.135109218 | 0.012595758 |
| SNP_A.K_710510_4_8425607   | 4  | 8425607  | 2.66E-06 | 0.10156 | 192 | 0.135044544 | 0.012638579 |
| SNP_A.K_1815620_11_8857077 | 11 | 8857077  | 2.71E-06 | 0.14844 | 192 | 0.134838637 | 0.012828626 |
| SNP_A.K_1815438_11_8852015 | 11 | 8852015  | 2.71E-06 | 0.14844 | 192 | 0.134822749 | 0.012828626 |
| SNP_A.K_727016_4_12069358  | 4  | 12069358 | 2.73E-06 | 0.05729 | 192 | 0.134760821 | 0.012855739 |
| SNP_A.K_730529_4_12698210  | 4  | 12698210 | 2.73E-06 | 0.21615 | 192 | 0.134747092 | 0.012855739 |
| SNP_A.K_1393181_8_10466636 | 8  | 10466636 | 2.77E-06 | 0.0625  | 192 | 0.13457387  | 0.01301953  |
| SNP_A.K_1552948_9_9225759  | 9  | 9225759  | 2.78E-06 | 0.22917 | 192 | 0.134551618 | 0.01301953  |
| SNP_A.K_724567_4_11634757  | 4  | 11634757 | 2.81E-06 | 0.18229 | 192 | 0.134433204 | 0.013126157 |
| SNP_A.K_1815334_11_8836292 | 11 | 8836292  | 2.81E-06 | 0.17708 | 192 | 0.134397574 | 0.013137803 |
| SNP_A.K_687579_4_3565945   | 4  | 3565945  | 2.84E-06 | 0.13281 | 192 | 0.134294109 | 0.013228163 |

|                            |    |          |          |         |     |             |             |
|----------------------------|----|----------|----------|---------|-----|-------------|-------------|
| SNP_A.K_725306_4_11791599  | 4  | 11791599 | 2.85E-06 | 0.23958 | 192 | 0.134238568 | 0.013263233 |
| SNP_A.K_706654_4_6930631   | 4  | 6930631  | 2.89E-06 | 0.18229 | 192 | 0.134109953 | 0.013384174 |
| SNP_A.K_1551786_9_9126240  | 9  | 9126240  | 2.96E-06 | 0.29427 | 192 | 0.13382338  | 0.013695235 |
| SNP_A.K_1814803_11_8776861 | 11 | 8776861  | 2.97E-06 | 0.14583 | 192 | 0.133784933 | 0.013711155 |
| SNP_A.K_1813046_11_8488787 | 11 | 8488787  | 2.99E-06 | 0.15104 | 192 | 0.133706586 | 0.013775424 |
| SNP_A.K_727022_4_12069883  | 4  | 12069883 | 3.04E-06 | 0.05729 | 192 | 0.133535148 | 0.013942371 |
| SNP_A.K_1196918_7_7667699  | 7  | 7667699  | 3.05E-06 | 0.02083 | 192 | 0.133472885 | 0.013942371 |
| SNP_A.K_1815585_11_8855936 | 11 | 8855936  | 3.06E-06 | 0.14583 | 192 | 0.133441939 | 0.013942371 |
| SNP_A.K_1815564_11_8855479 | 11 | 8855479  | 3.06E-06 | 0.14583 | 192 | 0.133438907 | 0.013942371 |
| SNP_A.K_708060_4_7522296   | 4  | 7522296  | 3.07E-06 | 0.20833 | 192 | 0.133420485 | 0.013942371 |
| SNP_A.K_1813301_11_8528262 | 11 | 8528262  | 3.07E-06 | 0.15104 | 192 | 0.133419768 | 0.013942371 |
| SNP_A.K_708749_4_8110906   | 4  | 8110906  | 3.08E-06 | 0.09896 | 192 | 0.133377149 | 0.013964267 |
| SNP_A.K_1552897_9_9224260  | 9  | 9224260  | 3.11E-06 | 0.23177 | 192 | 0.133251552 | 0.014087697 |
| SNP_A.K_1552909_9_9224603  | 9  | 9224603  | 3.12E-06 | 0.22917 | 192 | 0.133222868 | 0.014087697 |
| SNP_A.K_724630_4_11648139  | 4  | 11648139 | 3.13E-06 | 0.20313 | 192 | 0.133203129 | 0.014087697 |
| SNP_A.K_624824_3_27997787  | 3  | 27997787 | 3.18E-06 | 0.25781 | 192 | 0.133005874 | 0.014299039 |
| SNP_A.K_1487783_8_26983084 | 8  | 26983084 | 3.20E-06 | 0.04427 | 192 | 0.13295255  | 0.014299039 |
| SNP_A.K_1551961_9_9135127  | 9  | 9135127  | 3.20E-06 | 0.3151  | 192 | 0.132946617 | 0.014299039 |
| SNP_A.K_624512_3_27966375  | 3  | 27966375 | 3.20E-06 | 0.1901  | 192 | 0.132936044 | 0.014299039 |
| SNP_A.K_709467_4_8267957   | 4  | 8267957  | 3.23E-06 | 0.10417 | 192 | 0.132845443 | 0.014340613 |
| SNP_A.K_725561_4_11821553  | 4  | 11821553 | 3.24E-06 | 0.17969 | 192 | 0.132798703 | 0.014340613 |
| SNP_A.K_1813732_11_8574690 | 11 | 8574690  | 3.24E-06 | 0.16406 | 192 | 0.132791126 | 0.014340613 |
| SNP_A.K_1488914_8_27113919 | 8  | 27113919 | 3.24E-06 | 0.11198 | 192 | 0.132786873 | 0.014340613 |
| SNP_A.K_708774_4_8112498   | 4  | 8112498  | 3.24E-06 | 0.10156 | 192 | 0.132781865 | 0.014340613 |
| SNP_A.K_1551968_9_9135579  | 9  | 9135579  | 3.30E-06 | 0.2526  | 192 | 0.132576641 | 0.014485246 |
| SNP_A.K_1211151_7_9887065  | 7  | 9887065  | 3.31E-06 | 0.07031 | 192 | 0.132554234 | 0.014485246 |
| SNP_A.K_1813027_11_8487897 | 11 | 8487897  | 3.32E-06 | 0.15365 | 192 | 0.132514248 | 0.014485246 |
| SNP_A.K_730524_4_12698045  | 4  | 12698045 | 3.32E-06 | 0.25521 | 192 | 0.132505605 | 0.014485246 |
| SNP_A.K_1815431_11_8851771 | 11 | 8851771  | 3.33E-06 | 0.14063 | 192 | 0.132493875 | 0.014485246 |
| SNP_A.K_1814805_11_8776897 | 11 | 8776897  | 3.34E-06 | 0.13542 | 192 | 0.132470066 | 0.014485246 |
| SNP_A.K_1487878_8_26988976 | 8  | 26988976 | 3.34E-06 | 0.03906 | 192 | 0.132453027 | 0.014485246 |
| SNP_A.K_1487879_8_26988980 | 8  | 26988980 | 3.34E-06 | 0.03906 | 192 | 0.132453027 | 0.014485246 |
| SNP_A.K_1487899_8_26989186 | 8  | 26989186 | 3.34E-06 | 0.03906 | 192 | 0.132453027 | 0.014485246 |
| SNP_A.K_1813140_11_8518282 | 11 | 8518282  | 3.36E-06 | 0.15885 | 192 | 0.132395346 | 0.014528774 |
| SNP_A.K_1813261_11_8526065 | 11 | 8526065  | 3.38E-06 | 0.15365 | 192 | 0.132324333 | 0.014560163 |
| SNP_A.K_1815485_11_8853476 | 11 | 8853476  | 3.38E-06 | 0.14844 | 192 | 0.132323754 | 0.014560163 |
| SNP_A.K_730528_4_12698185  | 4  | 12698185 | 3.39E-06 | 0.21094 | 192 | 0.132274255 | 0.01459359  |
| SNP_A.K_708797_4_8114726   | 4  | 8114726  | 3.41E-06 | 0.07292 | 192 | 0.132210685 | 0.014645308 |
| SNP_A.K_709474_4_8268290   | 4  | 8268290  | 3.44E-06 | 0.09896 | 192 | 0.132112502 | 0.014742179 |
| SNP_A.K_1815555_11_8855282 | 11 | 8855282  | 3.46E-06 | 0.14844 | 192 | 0.132039207 | 0.01480725  |
| SNP_A.K_1815566_11_8855519 | 11 | 8855519  | 3.48E-06 | 0.14844 | 192 | 0.131978517 | 0.014856166 |
| SNP_A.K_1552891_9_9223996  | 9  | 9223996  | 3.55E-06 | 0.22917 | 192 | 0.131756208 | 0.015119207 |
| SNP_A.K_709599_4_8277661   | 4  | 8277661  | 3.59E-06 | 0.09896 | 192 | 0.131633657 | 0.015222422 |
| SNP_A.K_1551806_9_9126815  | 9  | 9126815  | 3.63E-06 | 0.36979 | 192 | 0.131498018 | 0.015222422 |
| SNP_A.K_1551705_9_9122135  | 9  | 9122135  | 3.64E-06 | 0.26302 | 192 | 0.131491177 | 0.015222422 |
| SNP_A.K_707033_4_6997430   | 4  | 6997430  | 3.64E-06 | 0.21094 | 192 | 0.131482528 | 0.015222422 |
| SNP_A.K_1551941_9_9134015  | 9  | 9134015  | 3.65E-06 | 0.26042 | 192 | 0.131455691 | 0.015222422 |
| SNP_A.K_708945_4_8151290   | 4  | 8151290  | 3.66E-06 | 0.1901  | 192 | 0.131425456 | 0.015222422 |
| SNP_A.K_730786_4_12954074  | 4  | 12954074 | 3.66E-06 | 0.19792 | 192 | 0.131418544 | 0.015222422 |
| SNP_A.K_709308_4_8248006   | 4  | 8248006  | 3.66E-06 | 0.11198 | 192 | 0.131417328 | 0.015222422 |

|                             |    |          |          |         |     |             |             |
|-----------------------------|----|----------|----------|---------|-----|-------------|-------------|
| SNP_A.K_1810489_11_8088821  | 11 | 8088821  | 3.67E-06 | 0.15625 | 192 | 0.131377114 | 0.015222422 |
| SNP_A.K_288218_2_4998843    | 2  | 4998843  | 3.74E-06 | 0.00521 | 192 | 0.131157961 | 0.015222422 |
| SNP_A.K_288228_2_4999616    | 2  | 4999616  | 3.74E-06 | 0.00521 | 192 | 0.131157961 | 0.015222422 |
| SNP_A.K_288229_2_4999648    | 2  | 4999648  | 3.74E-06 | 0.00521 | 192 | 0.131157961 | 0.015222422 |
| SNP_A.K_315911_2_8310508    | 2  | 8310508  | 3.74E-06 | 0.00521 | 192 | 0.131157961 | 0.015222422 |
| SNP_A.K_817407_4_31495768   | 4  | 31495768 | 3.74E-06 | 0.00521 | 192 | 0.131157961 | 0.015222422 |
| SNP_A.K_885802_5_8945161    | 5  | 8945161  | 3.74E-06 | 0.00521 | 192 | 0.131157961 | 0.015222422 |
| SNP_A.K_886511_5_13003572   | 5  | 13003572 | 3.74E-06 | 0.00521 | 192 | 0.131157961 | 0.015222422 |
| SNP_A.K_1371552_8_7852191   | 8  | 7852191  | 3.74E-06 | 0.00521 | 192 | 0.131157961 | 0.015222422 |
| SNP_A.K_363616_2_16455997   | 2  | 16455997 | 3.74E-06 | 0.00521 | 192 | 0.131157961 | 0.015222422 |
| SNP_A.K_528009_3_11220328   | 3  | 11220328 | 3.74E-06 | 0.00521 | 192 | 0.131157961 | 0.015222422 |
| SNP_A.K_1154455_6_29052368  | 6  | 29052368 | 3.74E-06 | 0.00521 | 192 | 0.131157961 | 0.015222422 |
| SNP_A.K_1371604_8_7858316   | 8  | 7858316  | 3.74E-06 | 0.00521 | 192 | 0.131157961 | 0.015222422 |
| SNP_A.K_1605756_9_19946683  | 9  | 19946683 | 3.74E-06 | 0.00521 | 192 | 0.131157961 | 0.015222422 |
| SNP_A.K_1752246_10_19901886 | 10 | 19901886 | 3.74E-06 | 0.00521 | 192 | 0.131157961 | 0.015222422 |
| SNP_A.K_725216_4_11763133   | 4  | 11763133 | 3.76E-06 | 0.14323 | 192 | 0.131106777 | 0.015261518 |
| SNP_A.K_1552881_9_9223720   | 9  | 9223720  | 3.80E-06 | 0.24479 | 192 | 0.130979824 | 0.015403426 |
| SNP_A.K_253133_1_40864747   | 1  | 40864747 | 3.82E-06 | 0.14323 | 192 | 0.130933486 | 0.015436515 |
| SNP_A.K_708922_4_8125665    | 4  | 8125665  | 3.87E-06 | 0.0651  | 192 | 0.1307915   | 0.015600894 |
| SNP_A.K_685874_4_2518130    | 4  | 2518130  | 3.90E-06 | 0.04948 | 192 | 0.13071047  | 0.015682494 |
| SNP_A.K_424818_2_25205727   | 2  | 25205727 | 3.90E-06 | 0.01563 | 192 | 0.130683019 | 0.015690196 |
| SNP_A.K_1815552_11_8855237  | 11 | 8855237  | 3.92E-06 | 0.14583 | 192 | 0.130629981 | 0.01570767  |
| SNP_A.K_1815567_11_8855642  | 11 | 8855642  | 3.92E-06 | 0.14583 | 192 | 0.130625569 | 0.01570767  |
| SNP_A.K_886241_5_11405244   | 5  | 11405244 | 3.93E-06 | 0.00521 | 192 | 0.130605003 | 0.01570767  |
| SNP_A.K_709446_4_8266337    | 4  | 8266337  | 3.96E-06 | 0.10156 | 192 | 0.130519626 | 0.015796211 |
| SNP_A.K_1815459_11_8852717  | 11 | 8852717  | 3.98E-06 | 0.15104 | 192 | 0.130479432 | 0.015822064 |
| SNP_A.K_440181_2_28272190   | 2  | 28272190 | 3.98E-06 | 0.01563 | 192 | 0.130454916 | 0.015826094 |
| SNP_A.K_1551855_9_9129525   | 9  | 9129525  | 4.05E-06 | 0.25521 | 192 | 0.13027985  | 0.015961858 |
| SNP_A.K_1815461_11_8852743  | 11 | 8852743  | 4.05E-06 | 0.15104 | 192 | 0.13026603  | 0.015961858 |
| SNP_A.K_730519_4_12697846   | 4  | 12697846 | 4.06E-06 | 0.22396 | 192 | 0.130253129 | 0.015961858 |
| SNP_A.K_374611_2_17863769   | 2  | 17863769 | 4.06E-06 | 0.10938 | 192 | 0.130251637 | 0.015961858 |
| SNP_A.K_806606_4_29505446   | 4  | 29505446 | 4.08E-06 | 0.00521 | 192 | 0.130191342 | 0.015961858 |
| SNP_A.K_526222_3_10849783   | 3  | 10849783 | 4.08E-06 | 0.00521 | 192 | 0.130191342 | 0.015961858 |
| SNP_A.K_863296_5_3678971    | 5  | 3678971  | 4.08E-06 | 0.00521 | 192 | 0.130191342 | 0.015961858 |
| SNP_A.K_1488988_8_27119845  | 8  | 27119845 | 4.08E-06 | 0.11719 | 192 | 0.130186651 | 0.015961858 |
| SNP_A.K_1551738_9_9124100   | 9  | 9124100  | 4.11E-06 | 0.35677 | 192 | 0.13011058  | 0.016039336 |
| SNP_A.K_1551684_9_9120567   | 9  | 9120567  | 4.13E-06 | 0.15104 | 192 | 0.1300463   | 0.016063366 |
| SNP_A.K_1552930_9_9225086   | 9  | 9225086  | 4.13E-06 | 0.2474  | 192 | 0.130035913 | 0.016063366 |
| SNP_A.K_708975_4_8211883    | 4  | 8211883  | 4.14E-06 | 0.10156 | 192 | 0.130030106 | 0.016063366 |
| SNP_A.K_708681_4_8085071    | 4  | 8085071  | 4.15E-06 | 0.21354 | 192 | 0.129993551 | 0.016085321 |
| SNP_A.K_710506_4_8425311    | 4  | 8425311  | 4.20E-06 | 0.07552 | 192 | 0.129855942 | 0.016251846 |
| SNP_A.K_1552954_9_9225976   | 9  | 9225976  | 4.22E-06 | 0.22656 | 192 | 0.129810542 | 0.016286908 |
| SNP_A.K_709762_4_8285211    | 4  | 8285211  | 4.23E-06 | 0.08073 | 192 | 0.129775421 | 0.016307286 |
| SNP_A.K_1552430_9_9176508   | 9  | 9176508  | 4.29E-06 | 0.24479 | 192 | 0.129625419 | 0.016494391 |
| SNP_A.K_709246_4_8242605    | 4  | 8242605  | 4.29E-06 | 0.09635 | 192 | 0.129604385 | 0.016494599 |
| SNP_A.K_1552959_9_9226408   | 9  | 9226408  | 4.30E-06 | 0.1901  | 192 | 0.129582844 | 0.016495604 |
| SNP_A.K_1552889_9_9223960   | 9  | 9223960  | 4.32E-06 | 0.22917 | 192 | 0.129537119 | 0.016531974 |
| SNP_A.K_709132_4_8232773    | 4  | 8232773  | 4.34E-06 | 0.0625  | 192 | 0.129478321 | 0.016560586 |
| SNP_A.K_1552936_9_9225269   | 9  | 9225269  | 4.34E-06 | 0.26302 | 192 | 0.129476051 | 0.016560586 |
| SNP_A.K_1552532_9_9192773   | 9  | 9192773  | 4.38E-06 | 0.15365 | 192 | 0.129381404 | 0.016669224 |



|                            |    |          |          |         |     |             |             |
|----------------------------|----|----------|----------|---------|-----|-------------|-------------|
| SNP_A.K_1551683_9_9120529  | 9  | 9120529  | 4.42E-06 | 0.15625 | 192 | 0.129287872 | 0.016776994 |
| SNP_A.K_1815551_11_8855223 | 11 | 8855223  | 4.44E-06 | 0.14844 | 192 | 0.129238822 | 0.016813374 |
| SNP_A.K_1815601_11_8856277 | 11 | 8856277  | 4.46E-06 | 0.14844 | 192 | 0.129188215 | 0.016813374 |
| SNP_A.K_1815580_11_8855793 | 11 | 8855793  | 4.46E-06 | 0.14844 | 192 | 0.12918257  | 0.016813374 |
| SNP_A.K_1815450_11_8852407 | 11 | 8852407  | 4.46E-06 | 0.15365 | 192 | 0.129166792 | 0.016813374 |
| SNP_A.K_1552886_9_9223863  | 9  | 9223863  | 4.47E-06 | 0.23438 | 192 | 0.129160681 | 0.016813374 |
| SNP_A.K_1552634_9_9203413  | 9  | 9203413  | 4.48E-06 | 0.16146 | 192 | 0.129134208 | 0.016816606 |
| SNP_A.K_1813624_11_8561348 | 11 | 8561348  | 4.48E-06 | 0.17188 | 192 | 0.129117693 | 0.016816606 |
| SNP_A.K_708889_4_8121990   | 4  | 8121990  | 4.62E-06 | 0.20833 | 192 | 0.128774448 | 0.017290212 |
| SNP_A.K_1551724_9_9123486  | 9  | 9123486  | 4.63E-06 | 0.26302 | 192 | 0.128753786 | 0.017290212 |
| SNP_A.K_1487908_8_26989399 | 8  | 26989399 | 4.64E-06 | 0.04167 | 192 | 0.128742832 | 0.017290212 |
| SNP_A.K_1487914_8_26989490 | 8  | 26989490 | 4.67E-06 | 0.04167 | 192 | 0.128654233 | 0.017395139 |
| SNP_A.K_708515_4_8059492   | 4  | 8059492  | 4.73E-06 | 0.10417 | 192 | 0.128524018 | 0.017565359 |
| SNP_A.K_1543942_9_7179036  | 9  | 7179036  | 4.77E-06 | 0.03906 | 192 | 0.128409963 | 0.017711975 |
| SNP_A.K_288315_2_5007791   | 2  | 5007791  | 4.80E-06 | 0.01563 | 192 | 0.128351951 | 0.017771498 |
| SNP_A.K_708381_4_8041630   | 4  | 8041630  | 4.82E-06 | 0.07031 | 192 | 0.128310709 | 0.017804826 |
| SNP_A.K_1815441_11_8852154 | 11 | 8852154  | 4.84E-06 | 0.15104 | 192 | 0.128253582 | 0.017863386 |
| SNP_A.K_1813478_11_8540416 | 11 | 8540416  | 4.91E-06 | 0.15625 | 192 | 0.128088719 | 0.018025144 |
| SNP_A.K_1815617_11_8856875 | 11 | 8856875  | 4.92E-06 | 0.16146 | 192 | 0.128065982 | 0.018025144 |
| SNP_A.K_636157_3_29648616  | 3  | 29648616 | 4.93E-06 | 0.04427 | 192 | 0.12805086  | 0.018025144 |
| SNP_A.K_1813259_11_8525961 | 11 | 8525961  | 4.93E-06 | 0.15104 | 192 | 0.128041179 | 0.018025144 |
| SNP_A.K_709028_4_8213733   | 4  | 8213733  | 4.93E-06 | 0.21094 | 192 | 0.128037689 | 0.018025144 |
| SNP_A.K_1782845_11_3505689 | 11 | 3505689  | 4.94E-06 | 0.03125 | 192 | 0.128024632 | 0.018025144 |
| SNP_A.K_1815458_11_8852702 | 11 | 8852702  | 4.96E-06 | 0.15104 | 192 | 0.127981676 | 0.018025144 |
| SNP_A.K_1552924_9_9224936  | 9  | 9224936  | 4.97E-06 | 0.25781 | 192 | 0.127946102 | 0.018025144 |
| SNP_A.K_724597_4_11643216  | 4  | 11643216 | 4.98E-06 | 0.1875  | 192 | 0.127936882 | 0.018025144 |
| SNP_A.K_613471_3_26710142  | 3  | 26710142 | 4.99E-06 | 0.15885 | 192 | 0.127914371 | 0.018025144 |
| SNP_A.K_730797_4_12954926  | 4  | 12954926 | 5.00E-06 | 0.20052 | 192 | 0.127892179 | 0.018025144 |
| SNP_A.K_1815470_11_8853087 | 11 | 8853087  | 5.02E-06 | 0.15104 | 192 | 0.12785046  | 0.018025144 |
| SNP_A.K_1815579_11_8855791 | 11 | 8855791  | 5.02E-06 | 0.15104 | 192 | 0.12784712  | 0.018025144 |
| SNP_A.K_1815537_11_8854907 | 11 | 8854907  | 5.03E-06 | 0.15104 | 192 | 0.127825275 | 0.018025144 |
| SNP_A.K_1815531_11_8854811 | 11 | 8854811  | 5.03E-06 | 0.15104 | 192 | 0.127825275 | 0.018025144 |
| SNP_A.K_1815536_11_8854878 | 11 | 8854878  | 5.03E-06 | 0.15104 | 192 | 0.127825275 | 0.018025144 |
| SNP_A.K_1815716_11_8883590 | 11 | 8883590  | 5.03E-06 | 0.15104 | 192 | 0.12781651  | 0.018025144 |
| SNP_A.K_1815444_11_8852306 | 11 | 8852306  | 5.05E-06 | 0.15104 | 192 | 0.127782454 | 0.018048547 |
| SNP_A.K_1174425_7_1714065  | 7  | 1714065  | 5.12E-06 | 0.0625  | 192 | 0.127618443 | 0.018281336 |
| SNP_A.K_709761_4_8285205   | 4  | 8285205  | 5.15E-06 | 0.08594 | 192 | 0.127550857 | 0.018345375 |
| SNP_A.K_727458_4_12136897  | 4  | 12136897 | 5.16E-06 | 0.04427 | 192 | 0.127540339 | 0.018345375 |
| SNP_A.K_709525_4_8271593   | 4  | 8271593  | 5.19E-06 | 0.07292 | 192 | 0.127466293 | 0.018434649 |
| SNP_A.K_724644_4_11650814  | 4  | 11650814 | 5.24E-06 | 0.20313 | 192 | 0.127359482 | 0.018578302 |
| SNP_A.K_708767_4_8111399   | 4  | 8111399  | 5.25E-06 | 0.10417 | 192 | 0.127333742 | 0.018589073 |
| SNP_A.K_709527_4_8271604   | 4  | 8271604  | 5.26E-06 | 0.07552 | 192 | 0.127309944 | 0.018596704 |
| SNP_A.K_1552030_9_9139882  | 9  | 9139882  | 5.31E-06 | 0.25781 | 192 | 0.127198256 | 0.018728799 |
| SNP_A.K_730549_4_12699272  | 4  | 12699272 | 5.32E-06 | 0.21354 | 192 | 0.127191869 | 0.018728799 |
| SNP_A.K_1777345_11_2489144 | 11 | 2489144  | 5.39E-06 | 0.13281 | 192 | 0.127049824 | 0.018908068 |
| SNP_A.K_1132994_6_25647636 | 6  | 25647636 | 5.39E-06 | 0.01823 | 192 | 0.127046331 | 0.018908068 |
| SNP_A.K_730504_4_12697046  | 4  | 12697046 | 5.42E-06 | 0.21875 | 192 | 0.126982882 | 0.018946659 |
| SNP_A.K_727008_4_12068565  | 4  | 12068565 | 5.42E-06 | 0.0599  | 192 | 0.126973231 | 0.018946659 |
| SNP_A.K_1487905_8_26989374 | 8  | 26989374 | 5.42E-06 | 0.04167 | 192 | 0.126966437 | 0.018946659 |
| SNP_A.K_1028669_6_10676525 | 6  | 10676525 | 5.44E-06 | 0.03125 | 192 | 0.126925759 | 0.018983284 |

|                            |    |          |          |         |     |             |             |
|----------------------------|----|----------|----------|---------|-----|-------------|-------------|
| SNP_A.K_1812688_11_8462724 | 11 | 8462724  | 5.47E-06 | 0.16667 | 192 | 0.126876906 | 0.019033832 |
| SNP_A.K_726156_4_11923161  | 4  | 11923161 | 5.48E-06 | 0.03385 | 192 | 0.126843057 | 0.019059192 |
| SNP_A.K_685240_4_2447337   | 4  | 2447337  | 5.50E-06 | 0.01823 | 192 | 0.126805183 | 0.019091456 |
| SNP_A.K_1815525_11_8854768 | 11 | 8854768  | 5.59E-06 | 0.15365 | 192 | 0.126632903 | 0.019348516 |
| SNP_A.K_388507_2_19730767  | 2  | 19730767 | 5.61E-06 | 0.07031 | 192 | 0.126597012 | 0.019348516 |
| SNP_A.K_1279730_7_20912600 | 7  | 20912600 | 5.62E-06 | 0.20313 | 192 | 0.126565943 | 0.019348516 |
| SNP_A.K_1815578_11_8855779 | 11 | 8855779  | 5.63E-06 | 0.15365 | 192 | 0.126547327 | 0.019348516 |
| SNP_A.K_1028408_6_10600462 | 6  | 10600462 | 5.64E-06 | 0.0599  | 192 | 0.126535234 | 0.019348516 |
| SNP_A.K_1814893_11_8784439 | 11 | 8784439  | 5.64E-06 | 0.15885 | 192 | 0.126526112 | 0.019348516 |
| SNP_A.K_708735_4_8089934   | 4  | 8089934  | 5.65E-06 | 0.10156 | 192 | 0.126514177 | 0.019348516 |
| SNP_A.K_1815499_11_8854115 | 11 | 8854115  | 5.65E-06 | 0.15365 | 192 | 0.126505137 | 0.019348516 |
| SNP_A.K_1813006_11_8486470 | 11 | 8486470  | 5.68E-06 | 0.1276  | 192 | 0.126439488 | 0.019372031 |
| SNP_A.K_1815514_11_8854504 | 11 | 8854504  | 5.70E-06 | 0.15365 | 192 | 0.126417557 | 0.019372031 |
| SNP_A.K_1815498_11_8854102 | 11 | 8854102  | 5.70E-06 | 0.15365 | 192 | 0.126417557 | 0.019372031 |
| SNP_A.K_1815515_11_8854508 | 11 | 8854508  | 5.70E-06 | 0.15365 | 192 | 0.126417557 | 0.019372031 |
| SNP_A.K_623825_3_27887046  | 3  | 27887046 | 5.74E-06 | 0.1875  | 192 | 0.126324598 | 0.019500651 |
| SNP_A.K_1552912_9_9224710  | 9  | 9224710  | 5.75E-06 | 0.26823 | 192 | 0.12630159  | 0.019508689 |
| SNP_A.K_1813020_11_8487380 | 11 | 8487380  | 5.77E-06 | 0.11719 | 192 | 0.126265223 | 0.01953994  |
| SNP_A.K_1812993_11_8485723 | 11 | 8485723  | 5.82E-06 | 0.16406 | 192 | 0.126170154 | 0.019673547 |
| SNP_A.K_288264_2_5001299   | 2  | 5001299  | 5.88E-06 | 0.01563 | 192 | 0.126068251 | 0.019820162 |
| SNP_A.K_288590_2_5045817   | 2  | 5045817  | 5.98E-06 | 0.01042 | 192 | 0.125878042 | 0.020125143 |
| SNP_A.K_1815481_11_8853309 | 11 | 8853309  | 6.02E-06 | 0.15625 | 192 | 0.125790238 | 0.020201933 |
| SNP_A.K_288233_2_5000218   | 2  | 5000218  | 6.02E-06 | 0.01563 | 192 | 0.12578839  | 0.020201933 |
| SNP_A.K_1815440_11_8852122 | 11 | 8852122  | 6.03E-06 | 0.16146 | 192 | 0.125780632 | 0.020201933 |
| SNP_A.K_710019_4_8308488   | 4  | 8308488  | 6.12E-06 | 0.08073 | 192 | 0.125606634 | 0.020483604 |
| SNP_A.K_727011_4_12068704  | 4  | 12068704 | 6.21E-06 | 0.0599  | 192 | 0.125449926 | 0.020501251 |
| SNP_A.K_685900_4_2519168   | 4  | 2519168  | 6.22E-06 | 0.07813 | 192 | 0.125422284 | 0.020501251 |
| SNP_A.K_1813135_11_8517675 | 11 | 8517675  | 6.23E-06 | 0.15625 | 192 | 0.125400171 | 0.020501251 |
| SNP_A.K_1815571_11_8855679 | 11 | 8855679  | 6.24E-06 | 0.15625 | 192 | 0.125397065 | 0.020501251 |
| SNP_A.K_729053_4_12505814  | 4  | 12505814 | 6.25E-06 | 0.21615 | 192 | 0.125364499 | 0.020501251 |
| SNP_A.K_1814806_11_8776900 | 11 | 8776900  | 6.31E-06 | 0.14063 | 192 | 0.125266488 | 0.020501251 |
| SNP_A.K_709390_4_8264164   | 4  | 8264164  | 6.31E-06 | 0.06771 | 192 | 0.125265042 | 0.020501251 |
| SNP_A.K_1552856_9_9222461  | 9  | 9222461  | 6.34E-06 | 0.35938 | 192 | 0.125203118 | 0.020501251 |
| SNP_A.K_1815465_11_8852885 | 11 | 8852885  | 6.36E-06 | 0.15104 | 192 | 0.125176182 | 0.020501251 |
| SNP_A.K_1810466_11_8086737 | 11 | 8086737  | 6.36E-06 | 0.15104 | 192 | 0.125166877 | 0.020501251 |
| SNP_A.K_1815509_11_8854358 | 11 | 8854358  | 6.38E-06 | 0.15104 | 192 | 0.125134819 | 0.020501251 |
| SNP_A.K_1815563_11_8855398 | 11 | 8855398  | 6.38E-06 | 0.15104 | 192 | 0.125134819 | 0.020501251 |
| SNP_A.K_1815503_11_8854182 | 11 | 8854182  | 6.39E-06 | 0.15104 | 192 | 0.125127242 | 0.020501251 |
| SNP_A.K_1815504_11_8854202 | 11 | 8854202  | 6.39E-06 | 0.15104 | 192 | 0.125127242 | 0.020501251 |
| SNP_A.K_1815505_11_8854228 | 11 | 8854228  | 6.39E-06 | 0.15104 | 192 | 0.125127242 | 0.020501251 |
| SNP_A.K_726145_4_11920509  | 4  | 11920509 | 6.40E-06 | 0.06771 | 192 | 0.125108482 | 0.020501251 |
| SNP_A.K_1812692_11_8462782 | 11 | 8462782  | 6.43E-06 | 0.16406 | 192 | 0.125057686 | 0.020501251 |
| SNP_A.K_708572_4_8061987   | 4  | 8061987  | 6.44E-06 | 0.06771 | 192 | 0.125032424 | 0.020501251 |
| SNP_A.K_708696_4_8086923   | 4  | 8086923  | 6.44E-06 | 0.06771 | 192 | 0.125032424 | 0.020501251 |
| SNP_A.K_708983_4_8212173   | 4  | 8212173  | 6.44E-06 | 0.06771 | 192 | 0.125032424 | 0.020501251 |
| SNP_A.K_709363_4_8258876   | 4  | 8258876  | 6.44E-06 | 0.06771 | 192 | 0.125032424 | 0.020501251 |
| SNP_A.K_709372_4_8259282   | 4  | 8259282  | 6.44E-06 | 0.06771 | 192 | 0.125032424 | 0.020501251 |
| SNP_A.K_709383_4_8263151   | 4  | 8263151  | 6.44E-06 | 0.06771 | 192 | 0.125032424 | 0.020501251 |
| SNP_A.K_709580_4_8274751   | 4  | 8274751  | 6.44E-06 | 0.06771 | 192 | 0.125032424 | 0.020501251 |
| SNP_A.K_709681_4_8280871   | 4  | 8280871  | 6.44E-06 | 0.06771 | 192 | 0.125032424 | 0.020501251 |

|                             |    |          |          |         |     |             |             |
|-----------------------------|----|----------|----------|---------|-----|-------------|-------------|
| SNP_A.K_708650_4_8070918    | 4  | 8070918  | 6.44E-06 | 0.06771 | 192 | 0.125032424 | 0.020501251 |
| SNP_A.K_708697_4_8086929    | 4  | 8086929  | 6.44E-06 | 0.06771 | 192 | 0.125032424 | 0.020501251 |
| SNP_A.K_708724_4_8089128    | 4  | 8089128  | 6.44E-06 | 0.06771 | 192 | 0.125032424 | 0.020501251 |
| SNP_A.K_709532_4_8271878    | 4  | 8271878  | 6.44E-06 | 0.06771 | 192 | 0.125032424 | 0.020501251 |
| SNP_A.K_709544_4_8272941    | 4  | 8272941  | 6.44E-06 | 0.06771 | 192 | 0.125032424 | 0.020501251 |
| SNP_A.K_709545_4_8272956    | 4  | 8272956  | 6.44E-06 | 0.06771 | 192 | 0.125032424 | 0.020501251 |
| SNP_A.K_709581_4_8274764    | 4  | 8274764  | 6.44E-06 | 0.06771 | 192 | 0.125032424 | 0.020501251 |
| SNP_A.K_708896_4_8122472    | 4  | 8122472  | 6.45E-06 | 0.06771 | 192 | 0.125012331 | 0.020502961 |
| SNP_A.K_253411_1_40888350   | 1  | 40888350 | 6.46E-06 | 0.14063 | 192 | 0.12499298  | 0.020502961 |
| SNP_A.K_1814372_11_8622044  | 11 | 8622044  | 6.47E-06 | 0.15885 | 192 | 0.124980005 | 0.020502961 |
| SNP_A.K_1552007_9_9138358   | 9  | 9138358  | 6.54E-06 | 0.26823 | 192 | 0.124862416 | 0.020686956 |
| SNP_A.K_709123_4_8230845    | 4  | 8230845  | 6.57E-06 | 0.06771 | 192 | 0.12481355  | 0.020714195 |
| SNP_A.K_1681526_10_10209690 | 10 | 10209690 | 6.57E-06 | 0.02083 | 192 | 0.124813488 | 0.020714195 |
| SNP_A.K_1552872_9_9223007   | 9  | 9223007  | 6.62E-06 | 0.3099  | 192 | 0.12472466  | 0.020821187 |
| SNP_A.K_1813689_11_8566185  | 11 | 8566185  | 6.63E-06 | 0.17708 | 192 | 0.12471192  | 0.020821187 |
| SNP_A.K_613662_3_26726882   | 3  | 26726882 | 6.63E-06 | 0.16146 | 192 | 0.124704558 | 0.020821187 |
| SNP_A.K_1552902_9_9224373   | 9  | 9224373  | 6.65E-06 | 0.24219 | 192 | 0.124679208 | 0.020836754 |
| SNP_A.K_971666_6_276357     | 6  | 276357   | 6.78E-06 | 0.20313 | 192 | 0.124456639 | 0.021221424 |
| SNP_A.K_29885_1_4292522     | 1  | 4292522  | 6.87E-06 | 0.04948 | 192 | 0.124309067 | 0.021398293 |
| SNP_A.K_726738_4_12039893   | 4  | 12039893 | 6.87E-06 | 0.04167 | 192 | 0.124306277 | 0.021398293 |
| SNP_A.K_708751_4_8110947    | 4  | 8110947  | 6.87E-06 | 0.10677 | 192 | 0.124300163 | 0.021398293 |
| SNP_A.K_727017_4_12069543   | 4  | 12069543 | 6.88E-06 | 0.0625  | 192 | 0.124295948 | 0.021398293 |
| SNP_A.K_1813170_11_8520979  | 11 | 8520979  | 6.90E-06 | 0.15885 | 192 | 0.124265644 | 0.021424047 |
| SNP_A.K_1552895_9_9224249   | 9  | 9224249  | 6.91E-06 | 0.24479 | 192 | 0.124243746 | 0.021433844 |
| SNP_A.K_708775_4_8112515    | 4  | 8112515  | 6.94E-06 | 0.10156 | 192 | 0.124188294 | 0.021507821 |
| SNP_A.K_727015_4_12069326   | 4  | 12069326 | 6.98E-06 | 0.0599  | 192 | 0.124127658 | 0.021571495 |
| SNP_A.K_1812846_11_8473363  | 11 | 8473363  | 7.01E-06 | 0.15885 | 192 | 0.124076736 | 0.021571495 |
| SNP_A.K_616205_3_26976558   | 3  | 26976558 | 7.06E-06 | 0.20573 | 192 | 0.124000804 | 0.021571495 |
| SNP_A.K_1812415_11_8416067  | 11 | 8416067  | 7.06E-06 | 0.15885 | 192 | 0.1239975   | 0.021571495 |
| SNP_A.K_1552956_9_9226016   | 9  | 9226016  | 7.11E-06 | 0.30729 | 192 | 0.123926448 | 0.021571495 |
| SNP_A.K_1812901_11_8478682  | 11 | 8478682  | 7.13E-06 | 0.15365 | 192 | 0.123882922 | 0.021571495 |
| SNP_A.K_723566_4_11474881   | 4  | 11474881 | 7.14E-06 | 0.20573 | 192 | 0.123871536 | 0.021571495 |
| SNP_A.K_1815492_11_8853812  | 11 | 8853812  | 7.16E-06 | 0.15365 | 192 | 0.123849464 | 0.021571495 |
| SNP_A.K_1815518_11_8854583  | 11 | 8854583  | 7.16E-06 | 0.15365 | 192 | 0.123849464 | 0.021571495 |
| SNP_A.K_1815526_11_8854775  | 11 | 8854775  | 7.16E-06 | 0.15365 | 192 | 0.123849464 | 0.021571495 |
| SNP_A.K_1815528_11_8854790  | 11 | 8854790  | 7.16E-06 | 0.15365 | 192 | 0.123849464 | 0.021571495 |
| SNP_A.K_1815529_11_8854805  | 11 | 8854805  | 7.16E-06 | 0.15365 | 192 | 0.123849464 | 0.021571495 |
| SNP_A.K_1815540_11_8854983  | 11 | 8854983  | 7.16E-06 | 0.15365 | 192 | 0.123849464 | 0.021571495 |
| SNP_A.K_1815541_11_8854985  | 11 | 8854985  | 7.16E-06 | 0.15365 | 192 | 0.123849464 | 0.021571495 |
| SNP_A.K_1815651_11_8859767  | 11 | 8859767  | 7.16E-06 | 0.15365 | 192 | 0.123849464 | 0.021571495 |
| SNP_A.K_1815466_11_8852919  | 11 | 8852919  | 7.16E-06 | 0.15365 | 192 | 0.123849464 | 0.021571495 |
| SNP_A.K_1815519_11_8854609  | 11 | 8854609  | 7.16E-06 | 0.15365 | 192 | 0.123849464 | 0.021571495 |
| SNP_A.K_1815720_11_8884036  | 11 | 8884036  | 7.16E-06 | 0.15365 | 192 | 0.123849464 | 0.021571495 |
| SNP_A.K_1813302_11_8528273  | 11 | 8528273  | 7.16E-06 | 0.15885 | 192 | 0.12384185  | 0.021571495 |
| SNP_A.K_1815522_11_8854673  | 11 | 8854673  | 7.18E-06 | 0.15365 | 192 | 0.123812618 | 0.021596458 |
| SNP_A.K_1815451_11_8852451  | 11 | 8852451  | 7.21E-06 | 0.15885 | 192 | 0.123768977 | 0.021632899 |
| SNP_A.K_1815506_11_8854242  | 11 | 8854242  | 7.21E-06 | 0.15365 | 192 | 0.123761269 | 0.021632899 |
| SNP_A.K_1487932_8_26989815  | 8  | 26989815 | 7.27E-06 | 0.04427 | 192 | 0.123670276 | 0.021638064 |
| SNP_A.K_1487974_8_26990831  | 8  | 26990831 | 7.27E-06 | 0.04427 | 192 | 0.123670276 | 0.021638064 |
| SNP_A.K_1487995_8_26991351  | 8  | 26991351 | 7.27E-06 | 0.04427 | 192 | 0.123670276 | 0.021638064 |

|                             |    |          |          |         |     |             |             |
|-----------------------------|----|----------|----------|---------|-----|-------------|-------------|
| SNP_A.K_1487942_8_26990147  | 8  | 26990147 | 7.27E-06 | 0.04427 | 192 | 0.123670276 | 0.021638064 |
| SNP_A.K_1487994_8_26991338  | 8  | 26991338 | 7.27E-06 | 0.04427 | 192 | 0.123670276 | 0.021638064 |
| SNP_A.K_707143_4_7162084    | 4  | 7162084  | 7.28E-06 | 0.21615 | 192 | 0.123661915 | 0.021638064 |
| SNP_A.K_708524_4_8060184    | 4  | 8060184  | 7.30E-06 | 0.07552 | 192 | 0.123623653 | 0.021680945 |
| SNP_A.K_709190_4_8237874    | 4  | 8237874  | 7.33E-06 | 0.10417 | 192 | 0.123580886 | 0.021732677 |
| SNP_A.K_508366_3_7553566    | 3  | 7553566  | 7.38E-06 | 0.10677 | 192 | 0.123509771 | 0.02183144  |
| SNP_A.K_724645_4_11650816   | 4  | 11650816 | 7.38E-06 | 0.20573 | 192 | 0.123498035 | 0.02183144  |
| SNP_A.K_725926_4_11885014   | 4  | 11885014 | 7.44E-06 | 0.15885 | 192 | 0.123412682 | 0.021966851 |
| SNP_A.K_623833_3_27887401   | 3  | 27887401 | 7.51E-06 | 0.17969 | 192 | 0.123309747 | 0.022113984 |
| SNP_A.K_1487861_8_26987202  | 8  | 26987202 | 7.52E-06 | 0.04427 | 192 | 0.123298268 | 0.022113984 |
| SNP_A.K_1551750_9_9124402   | 9  | 9124402  | 7.52E-06 | 0.27083 | 192 | 0.123290082 | 0.022113984 |
| SNP_A.K_1813669_11_8565183  | 11 | 8565183  | 7.55E-06 | 0.44792 | 192 | 0.123253896 | 0.022154103 |
| SNP_A.K_1763468_10_21740953 | 10 | 21740953 | 7.60E-06 | 0.17708 | 192 | 0.123180536 | 0.022267979 |
| SNP_A.K_709319_4_8248576    | 4  | 8248576  | 7.64E-06 | 0.21875 | 192 | 0.123121671 | 0.022317097 |
| SNP_A.K_1699032_10_12967177 | 10 | 12967177 | 7.64E-06 | 0.19792 | 192 | 0.123108704 | 0.022317097 |
| SNP_A.K_1815424_11_8851608  | 11 | 8851608  | 7.64E-06 | 0.13802 | 192 | 0.123108492 | 0.022317097 |
| SNP_A.K_1815464_11_8852876  | 11 | 8852876  | 7.69E-06 | 0.15625 | 192 | 0.123042289 | 0.02241654  |
| SNP_A.K_1815491_11_8853768  | 11 | 8853768  | 7.70E-06 | 0.15625 | 192 | 0.123024508 | 0.02241654  |
| SNP_A.K_1815524_11_8854764  | 11 | 8854764  | 7.72E-06 | 0.15625 | 192 | 0.12300265  | 0.02241654  |
| SNP_A.K_708514_4_8059398    | 4  | 8059398  | 7.72E-06 | 0.10417 | 192 | 0.12299583  | 0.02241654  |
| SNP_A.K_724167_4_11577615   | 4  | 11577615 | 7.74E-06 | 0.2526  | 192 | 0.122975771 | 0.022425375 |
| SNP_A.K_1815527_11_8854788  | 11 | 8854788  | 7.76E-06 | 0.15625 | 192 | 0.122940212 | 0.022441455 |
| SNP_A.K_614827_3_26816165   | 3  | 26816165 | 7.78E-06 | 0.16406 | 192 | 0.122909112 | 0.022441455 |
| SNP_A.K_2005748_12_13661416 | 12 | 13661416 | 7.79E-06 | 0.03646 | 192 | 0.122900623 | 0.022441455 |
| SNP_A.K_1815568_11_8855663  | 11 | 8855663  | 7.79E-06 | 0.15625 | 192 | 0.122897417 | 0.022441455 |
| SNP_A.K_709081_4_8218481    | 4  | 8218481  | 7.79E-06 | 0.22135 | 192 | 0.122889873 | 0.022441455 |
| SNP_A.K_1812958_11_8483284  | 11 | 8483284  | 7.88E-06 | 0.15625 | 192 | 0.122768183 | 0.022628308 |
| SNP_A.K_727014_4_12068983   | 4  | 12068983 | 7.88E-06 | 0.0599  | 192 | 0.12276587  | 0.022628308 |
| SNP_A.K_288697_2_5058170    | 2  | 5058170  | 7.91E-06 | 0.01563 | 192 | 0.122720991 | 0.022639919 |
| SNP_A.K_708750_4_8110911    | 4  | 8110911  | 7.92E-06 | 0.10938 | 192 | 0.12271388  | 0.022639919 |
| SNP_A.K_709721_4_8283492    | 4  | 8283492  | 7.92E-06 | 0.11458 | 192 | 0.122713799 | 0.022639919 |
| SNP_A.K_622454_3_27743329   | 3  | 27743329 | 7.97E-06 | 0.17708 | 192 | 0.12264749  | 0.022742927 |
| SNP_A.K_1815715_11_8883252  | 11 | 8883252  | 7.98E-06 | 0.15625 | 192 | 0.122624054 | 0.022759283 |
| SNP_A.K_1487881_8_26989003  | 8  | 26989003 | 8.01E-06 | 0.04427 | 192 | 0.12258164  | 0.022807523 |
| SNP_A.K_613526_3_26712409   | 3  | 26712409 | 8.04E-06 | 0.15885 | 192 | 0.122541623 | 0.022807523 |
| SNP_A.K_1814039_11_8596495  | 11 | 8596495  | 8.04E-06 | 0.15625 | 192 | 0.122535965 | 0.022807523 |
| SNP_A.K_1815516_11_8854522  | 11 | 8854522  | 8.05E-06 | 0.15625 | 192 | 0.122524397 | 0.022807523 |
| SNP_A.K_1815493_11_8853831  | 11 | 8853831  | 8.05E-06 | 0.15625 | 192 | 0.122523763 | 0.022807523 |
| SNP_A.K_1815473_11_8853133  | 11 | 8853133  | 8.10E-06 | 0.15625 | 192 | 0.122459294 | 0.022907866 |
| SNP_A.K_729367_4_12595036   | 4  | 12595036 | 8.16E-06 | 0.20573 | 192 | 0.122378664 | 0.023041894 |
| SNP_A.K_253046_1_40848308   | 1  | 40848308 | 8.19E-06 | 0.14583 | 192 | 0.122334539 | 0.023101417 |
| SNP_A.K_1551925_9_9132746   | 9  | 9132746  | 8.21E-06 | 0.26823 | 192 | 0.122309469 | 0.023121806 |
| SNP_A.K_709503_4_8270885    | 4  | 8270885  | 8.35E-06 | 0.10417 | 192 | 0.122112118 | 0.023500705 |
| SNP_A.K_710546_4_8426906    | 4  | 8426906  | 8.41E-06 | 0.10156 | 192 | 0.122036365 | 0.023628164 |
| SNP_A.K_1777240_11_2482491  | 11 | 2482491  | 8.44E-06 | 0.16927 | 192 | 0.122004569 | 0.023663367 |
| SNP_A.K_1487830_8_26985948  | 8  | 26985948 | 8.49E-06 | 0.04427 | 192 | 0.121937969 | 0.023772389 |
| SNP_A.K_708541_4_8060888    | 4  | 8060888  | 8.50E-06 | 0.10677 | 192 | 0.121922364 | 0.023773524 |
| SNP_A.K_1028139_6_10567125  | 6  | 10567125 | 8.60E-06 | 0.0599  | 192 | 0.121784869 | 0.024034767 |
| SNP_A.K_716331_4_9712846    | 4  | 9712846  | 8.64E-06 | 0.08854 | 192 | 0.121733709 | 0.02408694  |
| SNP_A.K_1815666_11_8860273  | 11 | 8860273  | 8.68E-06 | 0.15885 | 192 | 0.121682109 | 0.02408694  |

|                            |    |          |          |         |     |             |             |
|----------------------------|----|----------|----------|---------|-----|-------------|-------------|
| SNP_A.K_726235_4_11930224  | 4  | 11930224 | 8.69E-06 | 0.2474  | 192 | 0.121666816 | 0.02408694  |
| SNP_A.K_1812418_11_8416286 | 11 | 8416286  | 8.71E-06 | 0.17448 | 192 | 0.12164061  | 0.02408694  |
| SNP_A.K_1813527_11_8544616 | 11 | 8544616  | 8.73E-06 | 0.15885 | 192 | 0.121614258 | 0.02408694  |
| SNP_A.K_1813538_11_8553553 | 11 | 8553553  | 8.73E-06 | 0.15885 | 192 | 0.121614258 | 0.02408694  |
| SNP_A.K_1552875_9_9223466  | 9  | 9223466  | 8.73E-06 | 0.32292 | 192 | 0.121613691 | 0.02408694  |
| SNP_A.K_708571_4_8061962   | 4  | 8061962  | 8.75E-06 | 0.06771 | 192 | 0.12159843  | 0.02408694  |
| SNP_A.K_1813700_11_8567885 | 11 | 8567885  | 8.75E-06 | 0.15885 | 192 | 0.121593949 | 0.02408694  |
| SNP_A.K_1814140_11_8603156 | 11 | 8603156  | 8.75E-06 | 0.15885 | 192 | 0.121593949 | 0.02408694  |
| SNP_A.K_1812883_11_8476548 | 11 | 8476548  | 8.76E-06 | 0.15885 | 192 | 0.121581327 | 0.02408694  |
| SNP_A.K_1813692_11_8566360 | 11 | 8566360  | 8.77E-06 | 0.15885 | 192 | 0.121562374 | 0.02408694  |
| SNP_A.K_1812944_11_8482325 | 11 | 8482325  | 8.78E-06 | 0.15885 | 192 | 0.121560162 | 0.02408694  |
| SNP_A.K_1813735_11_8574808 | 11 | 8574808  | 8.80E-06 | 0.15885 | 192 | 0.121535291 | 0.02408694  |
| SNP_A.K_1815187_11_8821972 | 11 | 8821972  | 8.81E-06 | 0.15885 | 192 | 0.121514201 | 0.02408694  |
| SNP_A.K_1814120_11_8602300 | 11 | 8602300  | 8.81E-06 | 0.15885 | 192 | 0.121513096 | 0.02408694  |
| SNP_A.K_1814209_11_8607690 | 11 | 8607690  | 8.82E-06 | 0.15885 | 192 | 0.121507862 | 0.02408694  |
| SNP_A.K_253453_1_40892441  | 1  | 40892441 | 8.87E-06 | 0.3099  | 192 | 0.121446689 | 0.024160771 |
| SNP_A.K_1814251_11_8610219 | 11 | 8610219  | 8.87E-06 | 0.15885 | 192 | 0.121444235 | 0.024160771 |
| SNP_A.K_623361_3_27826478  | 3  | 27826478 | 8.92E-06 | 0.1901  | 192 | 0.121376756 | 0.024275034 |
| SNP_A.K_728998_4_12425251  | 4  | 12425251 | 8.94E-06 | 0.19271 | 192 | 0.121354535 | 0.024291505 |
| SNP_A.K_1815711_11_8882193 | 11 | 8882193  | 8.97E-06 | 0.15885 | 192 | 0.121321903 | 0.024330642 |
| SNP_A.K_1815649_11_8859743 | 11 | 8859743  | 8.99E-06 | 0.15885 | 192 | 0.121296317 | 0.024354554 |
| SNP_A.K_709683_4_8280900   | 4  | 8280900  | 9.02E-06 | 0.07292 | 192 | 0.121253002 | 0.024417167 |
| SNP_A.K_709276_4_8245560   | 4  | 8245560  | 9.10E-06 | 0.07292 | 192 | 0.12115704  | 0.024595392 |
| SNP_A.K_687591_4_3566516   | 4  | 3566516  | 9.23E-06 | 0.14583 | 192 | 0.121002167 | 0.024905732 |
| SNP_A.K_624391_3_27958906  | 3  | 27958906 | 9.24E-06 | 0.1875  | 192 | 0.120981379 | 0.02490606  |
| SNP_A.K_1551890_9_9131125  | 9  | 9131125  | 9.27E-06 | 0.27865 | 192 | 0.120950611 | 0.02490606  |
| SNP_A.K_709518_4_8271479   | 4  | 8271479  | 9.27E-06 | 0.07031 | 192 | 0.120946628 | 0.02490606  |
| SNP_A.K_726167_4_11925273  | 4  | 11925273 | 9.27E-06 | 0.23958 | 192 | 0.120944108 | 0.02490606  |
| SNP_A.K_1478146_8_24957861 | 8  | 24957861 | 9.29E-06 | 0.17708 | 192 | 0.120926228 | 0.024913739 |
| SNP_A.K_253016_1_40844876  | 1  | 40844876 | 9.37E-06 | 0.15365 | 192 | 0.120833212 | 0.025089363 |
| SNP_A.K_89994_1_12300538   | 1  | 12300538 | 9.44E-06 | 0.14323 | 192 | 0.120744698 | 0.025256127 |
| SNP_A.K_724252_4_11583763  | 4  | 11583763 | 9.46E-06 | 0.25    | 192 | 0.120718351 | 0.025283177 |
| SNP_A.K_1814081_11_8599597 | 11 | 8599597  | 9.51E-06 | 0.17188 | 192 | 0.120664096 | 0.025288739 |
| SNP_A.K_725920_4_11884523  | 4  | 11884523 | 9.51E-06 | 0.1224  | 192 | 0.120657858 | 0.025288739 |
| SNP_A.K_1813749_11_8575447 | 11 | 8575447  | 9.52E-06 | 0.17188 | 192 | 0.12065577  | 0.025288739 |
| SNP_A.K_727013_4_12068877  | 4  | 12068877 | 9.52E-06 | 0.0651  | 192 | 0.120647025 | 0.025288739 |
| SNP_A.K_315436_2_8285183   | 2  | 8285183  | 9.52E-06 | 0.01823 | 192 | 0.120644315 | 0.025288739 |
| SNP_A.K_1813543_11_8554160 | 11 | 8554160  | 9.58E-06 | 0.16146 | 192 | 0.12057825  | 0.025383914 |
| SNP_A.K_706659_4_6930917   | 4  | 6930917  | 9.59E-06 | 0.19271 | 192 | 0.120573795 | 0.025383914 |
| SNP_A.K_1813955_11_8590141 | 11 | 8590141  | 9.60E-06 | 0.16146 | 192 | 0.120558405 | 0.025386564 |
| SNP_A.K_723478_4_11461663  | 4  | 11461663 | 9.63E-06 | 0.21094 | 192 | 0.120520117 | 0.025423037 |
| SNP_A.K_724354_4_11590517  | 4  | 11590517 | 9.71E-06 | 0.23958 | 192 | 0.120433634 | 0.025423037 |
| SNP_A.K_1814780_11_8775095 | 11 | 8775095  | 9.73E-06 | 0.16146 | 192 | 0.1204011   | 0.025423037 |
| SNP_A.K_1813231_11_8524957 | 11 | 8524957  | 9.77E-06 | 0.16146 | 192 | 0.120363646 | 0.025423037 |
| SNP_A.K_709528_4_8271656   | 4  | 8271656  | 9.77E-06 | 0.07031 | 192 | 0.120362906 | 0.025423037 |
| SNP_A.K_709753_4_8284869   | 4  | 8284869  | 9.77E-06 | 0.07031 | 192 | 0.120362906 | 0.025423037 |
| SNP_A.K_373792_2_17594939  | 2  | 17594939 | 9.77E-06 | 0.0651  | 192 | 0.120356043 | 0.025423037 |
| SNP_A.K_1813572_11_8556911 | 11 | 8556911  | 9.79E-06 | 0.16146 | 192 | 0.120341477 | 0.025423037 |
| SNP_A.K_1812021_11_8371174 | 11 | 8371174  | 9.79E-06 | 0.16667 | 192 | 0.120339692 | 0.025423037 |
| SNP_A.K_1813150_11_8518739 | 11 | 8518739  | 9.79E-06 | 0.16146 | 192 | 0.120338209 | 0.025423037 |

|                             |    |          |          |         |     |             |             |
|-----------------------------|----|----------|----------|---------|-----|-------------|-------------|
| SNP_A.K_709118_4_8228979    | 4  | 8228979  | 9.81E-06 | 0.07552 | 192 | 0.120315583 | 0.025423037 |
| SNP_A.K_1814109_11_8601687  | 11 | 8601687  | 9.82E-06 | 0.16146 | 192 | 0.120303738 | 0.025423037 |
| SNP_A.K_723428_4_11453962   | 4  | 11453962 | 9.82E-06 | 0.24479 | 192 | 0.120302962 | 0.025423037 |
| SNP_A.K_1815314_11_8834222  | 11 | 8834222  | 9.82E-06 | 0.16146 | 192 | 0.120298947 | 0.025423037 |
| SNP_A.K_1815610_11_8856811  | 11 | 8856811  | 9.83E-06 | 0.16146 | 192 | 0.120295243 | 0.025423037 |
| SNP_A.K_1173613_7_1567280   | 7  | 1567280  | 9.83E-06 | 0.17188 | 192 | 0.120290661 | 0.025423037 |
| SNP_A.K_1814037_11_8596463  | 11 | 8596463  | 9.85E-06 | 0.16146 | 192 | 0.120270493 | 0.025423037 |
| SNP_A.K_1815611_11_8856819  | 11 | 8856819  | 9.85E-06 | 0.16146 | 192 | 0.120268384 | 0.025423037 |
| SNP_A.K_1812744_11_8465140  | 11 | 8465140  | 9.86E-06 | 0.16146 | 192 | 0.120256992 | 0.025423037 |
| SNP_A.K_1813654_11_8564508  | 11 | 8564508  | 9.87E-06 | 0.16146 | 192 | 0.120251314 | 0.025423037 |
| SNP_A.K_1815507_11_8854246  | 11 | 8854246  | 9.87E-06 | 0.15625 | 192 | 0.120247853 | 0.025423037 |
| SNP_A.K_1814858_11_8783237  | 11 | 8783237  | 9.88E-06 | 0.16667 | 192 | 0.120230546 | 0.02542737  |
| SNP_A.K_709128_4_8231909    | 4  | 8231909  | 9.91E-06 | 0.07031 | 192 | 0.120204512 | 0.02542737  |
| SNP_A.K_709130_4_8232406    | 4  | 8232406  | 9.91E-06 | 0.07031 | 192 | 0.120204512 | 0.02542737  |
| SNP_A.K_1812849_11_8473410  | 11 | 8473410  | 9.94E-06 | 0.16146 | 192 | 0.120163498 | 0.025489391 |
| SNP_A.K_1813015_11_8487058  | 11 | 8487058  | 9.98E-06 | 0.16406 | 192 | 0.120124119 | 0.02554787  |
| SNP_A.K_727215_4_12095252   | 4  | 12095252 | 9.99E-06 | 0.06771 | 192 | 0.120109282 | 0.025550375 |
| SNP_A.K_725925_4_11885007   | 4  | 11885007 | 1.00E-05 | 0.16146 | 192 | 0.120064295 | 0.025611476 |
| SNP_A.K_621205_3_27593787   | 3  | 27593787 | 1.00E-05 | 0.14583 | 192 | 0.120055149 | 0.025611476 |
| SNP_A.K_710410_4_8348771    | 4  | 8348771  | 1.01E-05 | 0.10156 | 192 | 0.120010985 | 0.025650213 |
| SNP_A.K_1551976_9_9135874   | 9  | 9135874  | 1.01E-05 | 0.27344 | 192 | 0.120010892 | 0.025650213 |
| SNP_A.K_709221_4_8241644    | 4  | 8241644  | 1.01E-05 | 0.07031 | 192 | 0.119988131 | 0.025671116 |
| SNP_A.K_708758_4_8111191    | 4  | 8111191  | 1.02E-05 | 0.07031 | 192 | 0.119930491 | 0.025674455 |
| SNP_A.K_709529_4_8271720    | 4  | 8271720  | 1.02E-05 | 0.07031 | 192 | 0.11991865  | 0.025674455 |
| SNP_A.K_709531_4_8271851    | 4  | 8271851  | 1.02E-05 | 0.07031 | 192 | 0.11991865  | 0.025674455 |
| SNP_A.K_709688_4_8281178    | 4  | 8281178  | 1.02E-05 | 0.07031 | 192 | 0.11991865  | 0.025674455 |
| SNP_A.K_708817_4_8115098    | 4  | 8115098  | 1.02E-05 | 0.07031 | 192 | 0.11991865  | 0.025674455 |
| SNP_A.K_1551680_9_9120360   | 9  | 9120360  | 1.02E-05 | 0.15625 | 192 | 0.119900062 | 0.025686019 |
| SNP_A.K_708851_4_8117273    | 4  | 8117273  | 1.02E-05 | 0.07292 | 192 | 0.11988176  | 0.02569697  |
| SNP_A.K_709504_4_8270934    | 4  | 8270934  | 1.02E-05 | 0.11458 | 192 | 0.119836259 | 0.025753843 |
| SNP_A.K_709689_4_8281236    | 4  | 8281236  | 1.02E-05 | 0.07031 | 192 | 0.119830028 | 0.025753843 |
| SNP_A.K_708725_4_8089158    | 4  | 8089158  | 1.03E-05 | 0.07031 | 192 | 0.119789125 | 0.025817102 |
| SNP_A.K_708692_4_8086415    | 4  | 8086415  | 1.03E-05 | 0.07031 | 192 | 0.119754856 | 0.025865199 |
| SNP_A.K_935612_5_21781134   | 5  | 21781134 | 1.04E-05 | 0.02604 | 192 | 0.11962806  | 0.026128918 |
| SNP_A.K_709018_4_8213055    | 4  | 8213055  | 1.05E-05 | 0.06771 | 192 | 0.119596299 | 0.026171812 |
| SNP_A.K_709542_4_8272829    | 4  | 8272829  | 1.05E-05 | 0.11198 | 192 | 0.119558964 | 0.026227901 |
| SNP_A.K_1744581_10_18871372 | 10 | 18871372 | 1.05E-05 | 0.08333 | 192 | 0.119527651 | 0.026229696 |
| SNP_A.K_708981_4_8212139    | 4  | 8212139  | 1.05E-05 | 0.07031 | 192 | 0.119518041 | 0.026229696 |
| SNP_A.K_708982_4_8212141    | 4  | 8212141  | 1.05E-05 | 0.07031 | 192 | 0.119518041 | 0.026229696 |
| SNP_A.K_1551676_9_9120167   | 9  | 9120167  | 1.06E-05 | 0.17448 | 192 | 0.119493707 | 0.026255492 |
| SNP_A.K_253251_1_40878818   | 1  | 40878818 | 1.06E-05 | 0.42969 | 192 | 0.119462475 | 0.026297587 |
| SNP_A.K_710492_4_8424885    | 4  | 8424885  | 1.06E-05 | 0.06771 | 192 | 0.119447285 | 0.026301988 |
| SNP_A.K_729659_4_12624469   | 4  | 12624469 | 1.06E-05 | 0.19531 | 192 | 0.119418183 | 0.026339214 |
| SNP_A.K_727124_4_12083242   | 4  | 12083242 | 1.07E-05 | 0.21354 | 192 | 0.119390741 | 0.026372614 |
| SNP_A.K_1814188_11_8605851  | 11 | 8605851  | 1.07E-05 | 0.16406 | 192 | 0.11936748  | 0.026388058 |
| SNP_A.K_1551954_9_9134635   | 9  | 9134635  | 1.07E-05 | 0.26042 | 192 | 0.119347441 | 0.026388058 |
| SNP_A.K_1744591_10_18873229 | 10 | 18873229 | 1.07E-05 | 0.08073 | 192 | 0.119323509 | 0.026388058 |
| SNP_A.K_1815413_11_8851132  | 11 | 8851132  | 1.07E-05 | 0.11458 | 192 | 0.119309349 | 0.026388058 |
| SNP_A.K_1140708_6_26884056  | 6  | 26884056 | 1.07E-05 | 0.36198 | 192 | 0.119299468 | 0.026388058 |
| SNP_A.K_970650_6_123745     | 6  | 123745   | 1.07E-05 | 0.22135 | 192 | 0.119297838 | 0.026388058 |

|                             |    |          |          |         |     |             |             |
|-----------------------------|----|----------|----------|---------|-----|-------------|-------------|
| SNP_A.K_467565_2_35155221   | 2  | 35155221 | 1.08E-05 | 0.05469 | 192 | 0.119237417 | 0.026388058 |
| SNP_A.K_1813839_11_8583008  | 11 | 8583008  | 1.08E-05 | 0.16406 | 192 | 0.11922663  | 0.026388058 |
| SNP_A.K_253292_1_40881667   | 1  | 40881667 | 1.08E-05 | 0.40885 | 192 | 0.11920265  | 0.026388058 |
| SNP_A.K_1814248_11_8610136  | 11 | 8610136  | 1.09E-05 | 0.16406 | 192 | 0.119179614 | 0.026388058 |
| SNP_A.K_253270_1_40880221   | 1  | 40880221 | 1.09E-05 | 0.41927 | 192 | 0.119171202 | 0.026388058 |
| SNP_A.K_1814316_11_8613129  | 11 | 8613129  | 1.09E-05 | 0.16406 | 192 | 0.119156004 | 0.026388058 |
| SNP_A.K_725901_4_11879947   | 4  | 11879947 | 1.09E-05 | 0.125   | 192 | 0.119152648 | 0.026388058 |
| SNP_A.K_1279731_7_20912634  | 7  | 20912634 | 1.09E-05 | 0.25    | 192 | 0.119147512 | 0.026388058 |
| SNP_A.K_725204_4_11762492   | 4  | 11762492 | 1.09E-05 | 0.11198 | 192 | 0.119144871 | 0.026388058 |
| SNP_A.K_253227_1_40876471   | 1  | 40876471 | 1.09E-05 | 0.42708 | 192 | 0.119136902 | 0.026388058 |
| SNP_A.K_253253_1_40878855   | 1  | 40878855 | 1.09E-05 | 0.42188 | 192 | 0.119128037 | 0.026388058 |
| SNP_A.K_1813990_11_8594033  | 11 | 8594033  | 1.09E-05 | 0.16406 | 192 | 0.119120506 | 0.026388058 |
| SNP_A.K_1813149_11_8518735  | 11 | 8518735  | 1.09E-05 | 0.16406 | 192 | 0.119116108 | 0.026388058 |
| SNP_A.K_1813283_11_8527538  | 11 | 8527538  | 1.09E-05 | 0.15885 | 192 | 0.119108792 | 0.026388058 |
| SNP_A.K_1813284_11_8527568  | 11 | 8527568  | 1.09E-05 | 0.15885 | 192 | 0.119108792 | 0.026388058 |
| SNP_A.K_1812796_11_8468766  | 11 | 8468766  | 1.10E-05 | 0.16406 | 192 | 0.119085399 | 0.026412765 |
| SNP_A.K_708868_4_8119732    | 4  | 8119732  | 1.10E-05 | 0.07552 | 192 | 0.11904993  | 0.026445648 |
| SNP_A.K_1552858_9_9222496   | 9  | 9222496  | 1.10E-05 | 0.2474  | 192 | 0.119038388 | 0.026445648 |
| SNP_A.K_613555_3_26715552   | 3  | 26715552 | 1.10E-05 | 0.15365 | 192 | 0.119032768 | 0.026445648 |
| SNP_A.K_693278_4_4944727    | 4  | 4944727  | 1.10E-05 | 0.04948 | 192 | 0.118998808 | 0.026495624 |
| SNP_A.K_1763561_10_21773985 | 10 | 21773985 | 1.11E-05 | 0.32552 | 192 | 0.118931669 | 0.026498716 |
| SNP_A.K_723072_4_11368341   | 4  | 11368341 | 1.11E-05 | 0.20833 | 192 | 0.118919881 | 0.026498716 |
| SNP_A.K_1812615_11_8455677  | 11 | 8455677  | 1.11E-05 | 0.16927 | 192 | 0.118910459 | 0.026498716 |
| SNP_A.K_1814147_11_8603570  | 11 | 8603570  | 1.11E-05 | 0.15885 | 192 | 0.118907959 | 0.026498716 |
| SNP_A.K_1813863_11_8583786  | 11 | 8583786  | 1.11E-05 | 0.15885 | 192 | 0.118907959 | 0.026498716 |
| SNP_A.K_1814148_11_8603574  | 11 | 8603574  | 1.11E-05 | 0.15885 | 192 | 0.118907959 | 0.026498716 |
| SNP_A.K_253223_1_40875847   | 1  | 40875847 | 1.11E-05 | 0.40885 | 192 | 0.118907744 | 0.026498716 |
| SNP_A.K_724187_4_11578865   | 4  | 11578865 | 1.11E-05 | 0.25781 | 192 | 0.118893401 | 0.026502466 |
| SNP_A.K_253458_1_40893321   | 1  | 40893321 | 1.12E-05 | 0.36458 | 192 | 0.118852283 | 0.026569915 |
| SNP_A.K_1953667_12_3612128  | 12 | 3612128  | 1.12E-05 | 0.07292 | 192 | 0.118838436 | 0.026572566 |
| SNP_A.K_726056_4_11897126   | 4  | 11897126 | 1.12E-05 | 0.2526  | 192 | 0.11881273  | 0.026603507 |
| SNP_A.K_1487989_8_26991145  | 8  | 26991145 | 1.13E-05 | 0.04948 | 192 | 0.118730155 | 0.026759481 |
| SNP_A.K_1487924_8_26989708  | 8  | 26989708 | 1.13E-05 | 0.04688 | 192 | 0.1187221   | 0.026759481 |
| SNP_A.K_253219_1_40875041   | 1  | 40875041 | 1.13E-05 | 0.41146 | 192 | 0.118694124 | 0.026760841 |
| SNP_A.K_624515_3_27966450   | 3  | 27966450 | 1.14E-05 | 0.19271 | 192 | 0.118683709 | 0.026760841 |
| SNP_A.K_1551989_9_9136691   | 9  | 9136691  | 1.14E-05 | 0.13281 | 192 | 0.118683556 | 0.026760841 |
| SNP_A.K_1487990_8_26991268  | 8  | 26991268 | 1.15E-05 | 0.04688 | 192 | 0.118511395 | 0.027146228 |
| SNP_A.K_709845_4_8299480    | 4  | 8299480  | 1.16E-05 | 0.05208 | 192 | 0.118462032 | 0.027235805 |
| SNP_A.K_1744838_10_18891229 | 10 | 18891229 | 1.16E-05 | 0.0651  | 192 | 0.118446337 | 0.027243367 |
| SNP_A.K_725849_4_11869726   | 4  | 11869726 | 1.16E-05 | 0.125   | 192 | 0.118425373 | 0.027263843 |
| SNP_A.K_708123_4_7543268    | 4  | 7543268  | 1.16E-05 | 0.21615 | 192 | 0.118401874 | 0.027290572 |
| SNP_A.K_614245_3_26780445   | 3  | 26780445 | 1.17E-05 | 0.17448 | 192 | 0.118379153 | 0.027315457 |
| SNP_A.K_725284_4_11781085   | 4  | 11781085 | 1.17E-05 | 0.11458 | 192 | 0.118345501 | 0.027367209 |
| SNP_A.K_1316099_7_27551126  | 7  | 27551126 | 1.17E-05 | 0.08594 | 192 | 0.118326606 | 0.027382844 |
| SNP_A.K_1488948_8_27117165  | 8  | 27117165 | 1.18E-05 | 0.13281 | 192 | 0.118258191 | 0.027520448 |
| SNP_A.K_253205_1_40874424   | 1  | 40874424 | 1.18E-05 | 0.41927 | 192 | 0.118225853 | 0.027548752 |
| SNP_A.K_615255_3_26852039   | 3  | 26852039 | 1.18E-05 | 0.17188 | 192 | 0.118213219 | 0.027548752 |
| SNP_A.K_1804565_11_7086542  | 11 | 7086542  | 1.18E-05 | 0.09115 | 192 | 0.118209283 | 0.027548752 |
| SNP_A.K_708504_4_8055739    | 4  | 8055739  | 1.19E-05 | 0.07813 | 192 | 0.118173251 | 0.027607064 |
| SNP_A.K_1813336_11_8530834  | 11 | 8530834  | 1.20E-05 | 0.16146 | 192 | 0.118108688 | 0.027736415 |

|                            |    |          |          |         |     |             |             |
|----------------------------|----|----------|----------|---------|-----|-------------|-------------|
| SNP_A.K_693811_4_5064993   | 4  | 5064993  | 1.20E-05 | 0.03906 | 192 | 0.118088667 | 0.027755321 |
| SNP_A.K_1487817_8_26985421 | 8  | 26985421 | 1.20E-05 | 0.04688 | 192 | 0.118038094 | 0.027755986 |
| SNP_A.K_253206_1_40874430  | 1  | 40874430 | 1.20E-05 | 0.3099  | 192 | 0.118029693 | 0.027755986 |
| SNP_A.K_1813711_11_8568938 | 11 | 8568938  | 1.21E-05 | 0.16146 | 192 | 0.117960987 | 0.027755986 |
| SNP_A.K_1814722_11_8771460 | 11 | 8771460  | 1.21E-05 | 0.17188 | 192 | 0.117954196 | 0.027755986 |
| SNP_A.K_1777352_11_2490224 | 11 | 2490224  | 1.21E-05 | 0.17188 | 192 | 0.117943948 | 0.027755986 |
| SNP_A.K_1812962_11_8483743 | 11 | 8483743  | 1.21E-05 | 0.16146 | 192 | 0.117939846 | 0.027755986 |
| SNP_A.K_1813017_11_8487219 | 11 | 8487219  | 1.21E-05 | 0.16146 | 192 | 0.117939846 | 0.027755986 |
| SNP_A.K_1813131_11_8517245 | 11 | 8517245  | 1.21E-05 | 0.16146 | 192 | 0.117939846 | 0.027755986 |
| SNP_A.K_1815497_11_8854083 | 11 | 8854083  | 1.22E-05 | 0.16667 | 192 | 0.11791422  | 0.027755986 |
| SNP_A.K_1813834_11_8582468 | 11 | 8582468  | 1.22E-05 | 0.16146 | 192 | 0.117907268 | 0.027755986 |
| SNP_A.K_1813864_11_8583790 | 11 | 8583790  | 1.22E-05 | 0.16146 | 192 | 0.117907268 | 0.027755986 |
| SNP_A.K_1552882_9_9223791  | 9  | 9223791  | 1.22E-05 | 0.20573 | 192 | 0.117869833 | 0.027755986 |
| SNP_A.K_1812957_11_8483224 | 11 | 8483224  | 1.22E-05 | 0.16146 | 192 | 0.117868147 | 0.027755986 |
| SNP_A.K_1812086_11_8377491 | 11 | 8377491  | 1.22E-05 | 0.16146 | 192 | 0.117865734 | 0.027755986 |
| SNP_A.K_1812827_11_8472145 | 11 | 8472145  | 1.22E-05 | 0.16146 | 192 | 0.117865734 | 0.027755986 |
| SNP_A.K_1812355_11_8410465 | 11 | 8410465  | 1.22E-05 | 0.16146 | 192 | 0.117853764 | 0.027755986 |
| SNP_A.K_1814627_11_8765891 | 11 | 8765891  | 1.22E-05 | 0.17188 | 192 | 0.117847369 | 0.027755986 |
| SNP_A.K_1815183_11_8821911 | 11 | 8821911  | 1.23E-05 | 0.16667 | 192 | 0.117826978 | 0.027755986 |
| SNP_A.K_710339_4_8336880   | 4  | 8336880  | 1.23E-05 | 0.05208 | 192 | 0.117824109 | 0.027755986 |
| SNP_A.K_614549_3_26798087  | 3  | 26798087 | 1.23E-05 | 0.16927 | 192 | 0.117823109 | 0.027755986 |
| SNP_A.K_709222_4_8241651   | 4  | 8241651  | 1.23E-05 | 0.07292 | 192 | 0.117819786 | 0.027755986 |
| SNP_A.K_709562_4_8273825   | 4  | 8273825  | 1.23E-05 | 0.22135 | 192 | 0.117806528 | 0.027755986 |
| SNP_A.K_709760_4_8285202   | 4  | 8285202  | 1.23E-05 | 0.09115 | 192 | 0.117806469 | 0.027755986 |
| SNP_A.K_1812025_11_8371435 | 11 | 8371435  | 1.23E-05 | 0.16667 | 192 | 0.11778651  | 0.027775576 |
| SNP_A.K_813337_4_31054643  | 4  | 31054643 | 1.23E-05 | 0.07552 | 192 | 0.117765317 | 0.027798291 |
| SNP_A.K_708570_4_8061896   | 4  | 8061896  | 1.23E-05 | 0.07813 | 192 | 0.117750553 | 0.027805013 |
| SNP_A.K_253457_1_40893176  | 1  | 40893176 | 1.25E-05 | 0.36458 | 192 | 0.117570632 | 0.02822703  |
| SNP_A.K_725196_4_11762123  | 4  | 11762123 | 1.26E-05 | 0.11198 | 192 | 0.117510971 | 0.028347934 |
| SNP_A.K_709014_4_8212856   | 4  | 8212856  | 1.27E-05 | 0.11198 | 192 | 0.117464516 | 0.028435672 |
| SNP_A.K_1815484_11_8853460 | 11 | 8853460  | 1.27E-05 | 0.16406 | 192 | 0.117438801 | 0.028470671 |
| SNP_A.K_253491_1_40897248  | 1  | 40897248 | 1.27E-05 | 0.16927 | 192 | 0.117394908 | 0.028552299 |
| SNP_A.K_730514_4_12697659  | 4  | 12697659 | 1.28E-05 | 0.22135 | 192 | 0.117381003 | 0.028557221 |
| SNP_A.K_1551732_9_9123876  | 9  | 9123876  | 1.28E-05 | 0.26823 | 192 | 0.117329988 | 0.028657491 |
| SNP_A.K_970963_6_162183    | 6  | 162183   | 1.29E-05 | 0.26042 | 192 | 0.117278178 | 0.028760205 |
| SNP_A.K_709416_4_8265516   | 4  | 8265516  | 1.29E-05 | 0.07552 | 192 | 0.11721668  | 0.028866339 |
| SNP_A.K_725270_4_11777022  | 4  | 11777022 | 1.30E-05 | 0.21354 | 192 | 0.117180809 | 0.028866339 |
| SNP_A.K_709206_4_8238891   | 4  | 8238891  | 1.30E-05 | 0.08073 | 192 | 0.117154092 | 0.028866339 |
| SNP_A.K_1180612_7_3237598  | 7  | 3237598  | 1.30E-05 | 0.09115 | 192 | 0.117130269 | 0.028866339 |
| SNP_A.K_709691_4_8281401   | 4  | 8281401  | 1.31E-05 | 0.07552 | 192 | 0.117096658 | 0.028866339 |
| SNP_A.K_1814996_11_8794482 | 11 | 8794482  | 1.31E-05 | 0.16927 | 192 | 0.117095407 | 0.028866339 |
| SNP_A.K_1815280_11_8830682 | 11 | 8830682  | 1.31E-05 | 0.16406 | 192 | 0.117087888 | 0.028866339 |
| SNP_A.K_709286_4_8245822   | 4  | 8245822  | 1.31E-05 | 0.07552 | 192 | 0.117086358 | 0.028866339 |
| SNP_A.K_1812553_11_8450365 | 11 | 8450365  | 1.31E-05 | 0.16927 | 192 | 0.11707758  | 0.028866339 |
| SNP_A.K_709207_4_8238911   | 4  | 8238911  | 1.32E-05 | 0.07552 | 192 | 0.117034587 | 0.028866339 |
| SNP_A.K_1812458_11_8437193 | 11 | 8437193  | 1.32E-05 | 0.16406 | 192 | 0.117032288 | 0.028866339 |
| SNP_A.K_727018_4_12069629  | 4  | 12069629 | 1.32E-05 | 0.06771 | 192 | 0.117031144 | 0.028866339 |
| SNP_A.K_253271_1_40880525  | 1  | 40880525 | 1.32E-05 | 0.42188 | 192 | 0.117029527 | 0.028866339 |
| SNP_A.K_1027060_6_10359412 | 6  | 10359412 | 1.32E-05 | 0.03125 | 192 | 0.117005383 | 0.028866339 |
| SNP_A.K_726924_4_12057240  | 4  | 12057240 | 1.32E-05 | 0.20833 | 192 | 0.116991394 | 0.028866339 |



|                             |    |          |          |         |     |             |             |
|-----------------------------|----|----------|----------|---------|-----|-------------|-------------|
| SNP_A.K_817414_4_31496720   | 4  | 31496720 | 1.32E-05 | 0.02083 | 192 | 0.116989238 | 0.028866339 |
| SNP_A.K_708818_4_8115105    | 4  | 8115105  | 1.33E-05 | 0.07292 | 192 | 0.116922505 | 0.028866339 |
| SNP_A.K_1141392_6_26999034  | 6  | 26999034 | 1.33E-05 | 0.26823 | 192 | 0.116902085 | 0.028866339 |
| SNP_A.K_1812973_11_8484308  | 11 | 8484308  | 1.34E-05 | 0.16406 | 192 | 0.1168232   | 0.028866339 |
| SNP_A.K_1813869_11_8583987  | 11 | 8583987  | 1.35E-05 | 0.16406 | 192 | 0.116768997 | 0.028866339 |
| SNP_A.K_1815144_11_8807874  | 11 | 8807874  | 1.35E-05 | 0.16406 | 192 | 0.1167583   | 0.028866339 |
| SNP_A.K_1813805_11_8580036  | 11 | 8580036  | 1.35E-05 | 0.16406 | 192 | 0.1167583   | 0.028866339 |
| SNP_A.K_1814153_11_8603831  | 11 | 8603831  | 1.35E-05 | 0.16406 | 192 | 0.116757792 | 0.028866339 |
| SNP_A.K_1814318_11_8613190  | 11 | 8613190  | 1.35E-05 | 0.16406 | 192 | 0.116757792 | 0.028866339 |
| SNP_A.K_1815098_11_8803478  | 11 | 8803478  | 1.35E-05 | 0.16406 | 192 | 0.116757792 | 0.028866339 |
| SNP_A.K_1813868_11_8583861  | 11 | 8583861  | 1.35E-05 | 0.16406 | 192 | 0.116757792 | 0.028866339 |
| SNP_A.K_1814101_11_8600921  | 11 | 8600921  | 1.35E-05 | 0.16406 | 192 | 0.116757792 | 0.028866339 |
| SNP_A.K_1814321_11_8613369  | 11 | 8613369  | 1.35E-05 | 0.16406 | 192 | 0.116757792 | 0.028866339 |
| SNP_A.K_1813659_11_8564710  | 11 | 8564710  | 1.35E-05 | 0.16406 | 192 | 0.11675337  | 0.028866339 |
| SNP_A.K_1812673_11_8461889  | 11 | 8461889  | 1.35E-05 | 0.16406 | 192 | 0.116739604 | 0.028866339 |
| SNP_A.K_1812528_11_8447848  | 11 | 8447848  | 1.35E-05 | 0.16406 | 192 | 0.116738081 | 0.028866339 |
| SNP_A.K_253235_1_40877112   | 1  | 40877112 | 1.35E-05 | 0.41667 | 192 | 0.116734781 | 0.028866339 |
| SNP_A.K_708872_4_8120638    | 4  | 8120638  | 1.35E-05 | 0.07292 | 192 | 0.116728095 | 0.028866339 |
| SNP_A.K_708679_4_8084885    | 4  | 8084885  | 1.35E-05 | 0.07292 | 192 | 0.116724717 | 0.028866339 |
| SNP_A.K_1812423_11_8416830  | 11 | 8416830  | 1.35E-05 | 0.16406 | 192 | 0.116719682 | 0.028866339 |
| SNP_A.K_1812535_11_8448437  | 11 | 8448437  | 1.35E-05 | 0.16406 | 192 | 0.116719682 | 0.028866339 |
| SNP_A.K_1812551_11_8450228  | 11 | 8450228  | 1.35E-05 | 0.16406 | 192 | 0.116719682 | 0.028866339 |
| SNP_A.K_1812534_11_8448330  | 11 | 8448330  | 1.35E-05 | 0.16406 | 192 | 0.116719682 | 0.028866339 |
| SNP_A.K_1812831_11_8472271  | 11 | 8472271  | 1.35E-05 | 0.16406 | 192 | 0.116719682 | 0.028866339 |
| SNP_A.K_709635_4_8278828    | 4  | 8278828  | 1.35E-05 | 0.07031 | 192 | 0.116715077 | 0.028866339 |
| SNP_A.K_1812003_11_8370003  | 11 | 8370003  | 1.35E-05 | 0.16927 | 192 | 0.116713762 | 0.028866339 |
| SNP_A.K_1813723_11_8571004  | 11 | 8571004  | 1.35E-05 | 0.16406 | 192 | 0.116713598 | 0.028866339 |
| SNP_A.K_1814118_11_8602101  | 11 | 8602101  | 1.36E-05 | 0.16927 | 192 | 0.116708446 | 0.028866339 |
| SNP_A.K_1813726_11_8571662  | 11 | 8571662  | 1.36E-05 | 0.16406 | 192 | 0.116699087 | 0.028866339 |
| SNP_A.K_1814149_11_8603612  | 11 | 8603612  | 1.36E-05 | 0.16406 | 192 | 0.11669641  | 0.028866339 |
| SNP_A.K_1812597_11_8454973  | 11 | 8454973  | 1.36E-05 | 0.16406 | 192 | 0.116684379 | 0.028866339 |
| SNP_A.K_419091_2_24516471   | 2  | 24516471 | 1.36E-05 | 0.04948 | 192 | 0.116679248 | 0.028866339 |
| SNP_A.K_725245_4_11766665   | 4  | 11766665 | 1.36E-05 | 0.11198 | 192 | 0.116658685 | 0.028866339 |
| SNP_A.K_1812894_11_8477443  | 11 | 8477443  | 1.36E-05 | 0.16406 | 192 | 0.116651115 | 0.028866339 |
| SNP_A.K_253222_1_40875720   | 1  | 40875720 | 1.36E-05 | 0.42448 | 192 | 0.116647702 | 0.028866339 |
| SNP_A.K_709370_4_8259079    | 4  | 8259079  | 1.36E-05 | 0.07292 | 192 | 0.116644005 | 0.028866339 |
| SNP_A.K_1814750_11_8772404  | 11 | 8772404  | 1.37E-05 | 0.16406 | 192 | 0.116628159 | 0.028878093 |
| SNP_A.K_614553_3_26798280   | 3  | 26798280 | 1.37E-05 | 0.16927 | 192 | 0.116588876 | 0.028950788 |
| SNP_A.K_708648_4_8070775    | 4  | 8070775  | 1.37E-05 | 0.07552 | 192 | 0.116553724 | 0.028985426 |
| SNP_A.K_706763_4_6934952    | 4  | 6934952  | 1.38E-05 | 0.20313 | 192 | 0.116544322 | 0.028985426 |
| SNP_A.K_708947_4_8151434    | 4  | 8151434  | 1.38E-05 | 0.20313 | 192 | 0.116536376 | 0.028985426 |
| SNP_A.K_1744583_10_18871643 | 10 | 18871643 | 1.38E-05 | 0.08073 | 192 | 0.116530473 | 0.028985426 |
| SNP_A.K_1310463_7_26336641  | 7  | 26336641 | 1.38E-05 | 0.1849  | 192 | 0.116515809 | 0.028994332 |
| SNP_A.K_1812614_11_8455655  | 11 | 8455655  | 1.39E-05 | 0.16406 | 192 | 0.116454503 | 0.029096007 |
| SNP_A.K_1551808_9_9126913   | 9  | 9126913  | 1.39E-05 | 0.27083 | 192 | 0.116454403 | 0.029096007 |
| SNP_A.K_723325_4_11432828   | 4  | 11432828 | 1.39E-05 | 0.20573 | 192 | 0.116414596 | 0.029123614 |
| SNP_A.K_1812126_11_8381841  | 11 | 8381841  | 1.39E-05 | 0.16406 | 192 | 0.116398442 | 0.029123614 |
| SNP_A.K_725208_4_11762688   | 4  | 11762688 | 1.39E-05 | 0.11198 | 192 | 0.116390522 | 0.029123614 |
| SNP_A.K_272449_2_1512770    | 2  | 1512770  | 1.40E-05 | 0.04427 | 192 | 0.116385099 | 0.029123614 |
| SNP_A.K_728226_4_12292000   | 4  | 12292000 | 1.40E-05 | 0.21094 | 192 | 0.11637726  | 0.029123614 |

|                             |    |          |          |         |     |             |             |
|-----------------------------|----|----------|----------|---------|-----|-------------|-------------|
| SNP_A.K_709087_4_8221014    | 4  | 8221014  | 1.40E-05 | 0.07552 | 192 | 0.116376761 | 0.029123614 |
| SNP_A.K_253201_1_40873876   | 1  | 40873876 | 1.40E-05 | 0.42448 | 192 | 0.116355584 | 0.029149228 |
| SNP_A.K_689530_4_4260652    | 4  | 4260652  | 1.40E-05 | 0.14063 | 192 | 0.116311387 | 0.029232879 |
| SNP_A.K_253252_1_40878834   | 1  | 40878834 | 1.41E-05 | 0.42708 | 192 | 0.116301712 | 0.029232879 |
| SNP_A.K_709522_4_8271574    | 4  | 8271574  | 1.41E-05 | 0.07552 | 192 | 0.116266126 | 0.029297278 |
| SNP_A.K_760861_4_19811966   | 4  | 19811966 | 1.42E-05 | 0.03125 | 192 | 0.116188217 | 0.029423545 |
| SNP_A.K_708706_4_8087942    | 4  | 8087942  | 1.42E-05 | 0.07292 | 192 | 0.116184402 | 0.029423545 |
| SNP_A.K_613533_3_26712753   | 3  | 26712753 | 1.42E-05 | 0.16146 | 192 | 0.116171346 | 0.029423545 |
| SNP_A.K_710467_4_8423720    | 4  | 8423720  | 1.42E-05 | 0.1276  | 192 | 0.116165063 | 0.029423545 |
| SNP_A.K_1744586_10_18872160 | 10 | 18872160 | 1.42E-05 | 0.08594 | 192 | 0.116162926 | 0.029423545 |
| SNP_A.K_970628_6_120967     | 6  | 120967   | 1.43E-05 | 0.21094 | 192 | 0.116121589 | 0.02950381  |
| SNP_A.K_709001_4_8212587    | 4  | 8212587  | 1.43E-05 | 0.07031 | 192 | 0.116094644 | 0.029510641 |
| SNP_A.K_1551733_9_9123916   | 9  | 9123916  | 1.43E-05 | 0.27344 | 192 | 0.116093609 | 0.029510641 |
| SNP_A.K_729028_4_12430012   | 4  | 12430012 | 1.43E-05 | 0.23698 | 192 | 0.116085965 | 0.029510641 |
| SNP_A.K_728236_4_12293902   | 4  | 12293902 | 1.44E-05 | 0.21094 | 192 | 0.116050967 | 0.029574406 |
| SNP_A.K_613976_3_26750990   | 3  | 26750990 | 1.44E-05 | 0.17448 | 192 | 0.116014227 | 0.029642986 |
| SNP_A.K_970730_6_128233     | 6  | 128233   | 1.45E-05 | 0.25521 | 192 | 0.115993251 | 0.029669669 |
| SNP_A.K_730518_4_12697769   | 4  | 12697769 | 1.45E-05 | 0.21354 | 192 | 0.115963534 | 0.029719759 |
| SNP_A.K_1814068_11_8599167  | 11 | 8599167  | 1.46E-05 | 0.17188 | 192 | 0.115904396 | 0.029796773 |
| SNP_A.K_1814151_11_8603709  | 11 | 8603709  | 1.46E-05 | 0.16667 | 192 | 0.115898644 | 0.029796773 |
| SNP_A.K_725259_4_11772124   | 4  | 11772124 | 1.46E-05 | 0.10938 | 192 | 0.115882632 | 0.029796773 |
| SNP_A.K_1812629_11_8457301  | 11 | 8457301  | 1.46E-05 | 0.16667 | 192 | 0.115874679 | 0.029796773 |
| SNP_A.K_708900_4_8122790    | 4  | 8122790  | 1.46E-05 | 0.07292 | 192 | 0.115872107 | 0.029796773 |
| SNP_A.K_708380_4_8041596    | 4  | 8041596  | 1.46E-05 | 0.07292 | 192 | 0.115858663 | 0.029796773 |
| SNP_A.K_709310_4_8248073    | 4  | 8248073  | 1.46E-05 | 0.11719 | 192 | 0.115855798 | 0.029796773 |
| SNP_A.K_724865_4_11690165   | 4  | 11690165 | 1.47E-05 | 0.20573 | 192 | 0.115837542 | 0.029796773 |
| SNP_A.K_1814049_11_8597252  | 11 | 8597252  | 1.47E-05 | 0.16667 | 192 | 0.11583448  | 0.029796773 |
| SNP_A.K_708127_4_7544397    | 4  | 7544397  | 1.47E-05 | 0.22917 | 192 | 0.115825757 | 0.029796773 |
| SNP_A.K_709646_4_8279119    | 4  | 8279119  | 1.47E-05 | 0.07292 | 192 | 0.115790895 | 0.029861228 |
| SNP_A.K_1815124_11_8806254  | 11 | 8806254  | 1.48E-05 | 0.16667 | 192 | 0.115706038 | 0.029970517 |
| SNP_A.K_724627_4_11647596   | 4  | 11647596 | 1.48E-05 | 0.21094 | 192 | 0.115696948 | 0.029970517 |
| SNP_A.K_708635_4_8068976    | 4  | 8068976  | 1.49E-05 | 0.07292 | 192 | 0.115652097 | 0.029970517 |
| SNP_A.K_1813647_11_8564287  | 11 | 8564287  | 1.49E-05 | 0.16667 | 192 | 0.115646881 | 0.029970517 |
| SNP_A.K_709396_4_8264967    | 4  | 8264967  | 1.49E-05 | 0.11198 | 192 | 0.115635948 | 0.029970517 |
| SNP_A.K_707120_4_7157830    | 4  | 7157830  | 1.49E-05 | 0.22135 | 192 | 0.115628242 | 0.029970517 |
| SNP_A.K_1813747_11_8575436  | 11 | 8575436  | 1.49E-05 | 0.17188 | 192 | 0.115625906 | 0.029970517 |
| SNP_A.K_1763063_10_21617798 | 10 | 21617798 | 1.50E-05 | 0.26042 | 192 | 0.115612522 | 0.029970517 |
| SNP_A.K_709585_4_8274829    | 4  | 8274829  | 1.50E-05 | 0.07292 | 192 | 0.115594795 | 0.029970517 |
| SNP_A.K_709519_4_8271517    | 4  | 8271517  | 1.50E-05 | 0.07292 | 192 | 0.115593844 | 0.029970517 |
| SNP_A.K_1813639_11_8563318  | 11 | 8563318  | 1.50E-05 | 0.16667 | 192 | 0.115587599 | 0.029970517 |
| SNP_A.K_1813904_11_8586993  | 11 | 8586993  | 1.50E-05 | 0.16667 | 192 | 0.115586387 | 0.029970517 |
| SNP_A.K_1813698_11_8566910  | 11 | 8566910  | 1.50E-05 | 0.16667 | 192 | 0.115580553 | 0.029970517 |
| SNP_A.K_709434_4_8265939    | 4  | 8265939  | 1.50E-05 | 0.07292 | 192 | 0.11557616  | 0.029970517 |
| SNP_A.K_1812753_11_8465735  | 11 | 8465735  | 1.50E-05 | 0.16667 | 192 | 0.115574267 | 0.029970517 |
| SNP_A.K_1813870_11_8584215  | 11 | 8584215  | 1.51E-05 | 0.16667 | 192 | 0.115542911 | 0.029970517 |
| SNP_A.K_709652_4_8279416    | 4  | 8279416  | 1.51E-05 | 0.07292 | 192 | 0.115537477 | 0.029970517 |
| SNP_A.K_1814880_11_8784070  | 11 | 8784070  | 1.51E-05 | 0.17188 | 192 | 0.115527544 | 0.029970517 |
| SNP_A.K_1552238_9_9162362   | 9  | 9162362  | 1.51E-05 | 0.29948 | 192 | 0.115526656 | 0.029970517 |
| SNP_A.K_708721_4_8089093    | 4  | 8089093  | 1.51E-05 | 0.08073 | 192 | 0.115519439 | 0.029970517 |
| SNP_A.K_708723_4_8089101    | 4  | 8089101  | 1.51E-05 | 0.08073 | 192 | 0.115519439 | 0.029970517 |

|                             |    |          |          |         |     |             |             |
|-----------------------------|----|----------|----------|---------|-----|-------------|-------------|
| SNP_A.K_705198_4_6538131    | 4  | 6538131  | 1.51E-05 | 0.17969 | 192 | 0.115514484 | 0.029970517 |
| SNP_A.K_707034_4_6997494    | 4  | 6997494  | 1.51E-05 | 0.23177 | 192 | 0.115473726 | 0.030051971 |
| SNP_A.K_708909_4_8124192    | 4  | 8124192  | 1.52E-05 | 0.07292 | 192 | 0.115459219 | 0.030062571 |
| SNP_A.K_709644_4_8279097    | 4  | 8279097  | 1.52E-05 | 0.07292 | 192 | 0.115405216 | 0.030180292 |
| SNP_A.K_1815299_11_8832849  | 11 | 8832849  | 1.53E-05 | 0.16146 | 192 | 0.115393196 | 0.03018424  |
| SNP_A.K_1814615_11_8765159  | 11 | 8765159  | 1.53E-05 | 0.17188 | 192 | 0.115371207 | 0.030197989 |
| SNP_A.K_725187_4_11748161   | 4  | 11748161 | 1.53E-05 | 0.11979 | 192 | 0.115367033 | 0.030197989 |
| SNP_A.K_1170399_7_1023301   | 7  | 1023301  | 1.53E-05 | 0.10938 | 192 | 0.115330832 | 0.030267828 |
| SNP_A.K_1552038_9_9140319   | 9  | 9140319  | 1.54E-05 | 0.32813 | 192 | 0.115303347 | 0.030314068 |
| SNP_A.K_730512_4_12697611   | 4  | 12697611 | 1.54E-05 | 0.27604 | 192 | 0.115277483 | 0.030355978 |
| SNP_A.K_1813886_11_8585843  | 11 | 8585843  | 1.55E-05 | 0.17708 | 192 | 0.115232743 | 0.030429254 |
| SNP_A.K_723448_4_11457373   | 4  | 11457373 | 1.55E-05 | 0.07031 | 192 | 0.1152297   | 0.030429254 |
| SNP_A.K_1813175_11_8521293  | 11 | 8521293  | 1.55E-05 | 0.17708 | 192 | 0.115188898 | 0.030444295 |
| SNP_A.K_708899_4_8122743    | 4  | 8122743  | 1.56E-05 | 0.07292 | 192 | 0.115178812 | 0.030444295 |
| SNP_A.K_288265_2_5001429    | 2  | 5001429  | 1.56E-05 | 0.01823 | 192 | 0.115169862 | 0.030444295 |
| SNP_A.K_708652_4_8071149    | 4  | 8071149  | 1.56E-05 | 0.07292 | 192 | 0.115161454 | 0.030444295 |
| SNP_A.K_709578_4_8274664    | 4  | 8274664  | 1.56E-05 | 0.07292 | 192 | 0.115161454 | 0.030444295 |
| SNP_A.K_709579_4_8274667    | 4  | 8274667  | 1.56E-05 | 0.07292 | 192 | 0.115161454 | 0.030444295 |
| SNP_A.K_624814_3_27997593   | 3  | 27997593 | 1.56E-05 | 0.26563 | 192 | 0.115126824 | 0.030477789 |
| SNP_A.K_391733_2_20195362   | 2  | 20195362 | 1.56E-05 | 0.03906 | 192 | 0.115122292 | 0.030477789 |
| SNP_A.K_253224_1_40875874   | 1  | 40875874 | 1.56E-05 | 0.40885 | 192 | 0.115117997 | 0.030477789 |
| SNP_A.K_723453_4_11457638   | 4  | 11457638 | 1.57E-05 | 0.21094 | 192 | 0.115082926 | 0.030545579 |
| SNP_A.K_1744831_10_18890945 | 10 | 18890945 | 1.58E-05 | 0.08333 | 192 | 0.114988479 | 0.030777668 |
| SNP_A.K_809301_4_30033826   | 4  | 30033826 | 1.58E-05 | 0.01302 | 192 | 0.114970948 | 0.030797511 |
| SNP_A.K_726963_4_12061610   | 4  | 12061610 | 1.59E-05 | 0.21615 | 192 | 0.114934335 | 0.030865012 |
| SNP_A.K_708895_4_8122443    | 4  | 8122443  | 1.59E-05 | 0.07292 | 192 | 0.114924047 | 0.030865012 |
| SNP_A.K_547271_3_15448670   | 3  | 15448670 | 1.59E-05 | 0.1276  | 192 | 0.114912146 | 0.030865012 |
| SNP_A.K_687582_4_3566163    | 4  | 3566163  | 1.59E-05 | 0.08594 | 192 | 0.114905242 | 0.030865012 |
| SNP_A.K_1552883_9_9223800   | 9  | 9223800  | 1.60E-05 | 0.20833 | 192 | 0.114830575 | 0.031037573 |
| SNP_A.K_709003_4_8212623    | 4  | 8212623  | 1.61E-05 | 0.07031 | 192 | 0.114822701 | 0.031037573 |
| SNP_A.K_253213_1_40874598   | 1  | 40874598 | 1.61E-05 | 0.41406 | 192 | 0.114790472 | 0.03109893  |
| SNP_A.K_253159_1_40869276   | 1  | 40869276 | 1.61E-05 | 0.42188 | 192 | 0.114767955 | 0.03111104  |
| SNP_A.K_724240_4_11583094   | 4  | 11583094 | 1.62E-05 | 0.13802 | 192 | 0.114754139 | 0.03111104  |
| SNP_A.K_1552903_9_9224383   | 9  | 9224383  | 1.62E-05 | 0.25781 | 192 | 0.114742061 | 0.03111104  |
| SNP_A.K_253268_1_40879996   | 1  | 40879996 | 1.62E-05 | 0.42188 | 192 | 0.114737793 | 0.03111104  |
| SNP_A.K_1812565_11_8452162  | 11 | 8452162  | 1.62E-05 | 0.16927 | 192 | 0.114734777 | 0.03111104  |
| SNP_A.K_1812803_11_8470002  | 11 | 8470002  | 1.63E-05 | 0.16927 | 192 | 0.114672327 | 0.031207586 |
| SNP_A.K_1813982_11_8592755  | 11 | 8592755  | 1.63E-05 | 0.16927 | 192 | 0.114671784 | 0.031207586 |
| SNP_A.K_1316100_7_27551212  | 7  | 27551212 | 1.63E-05 | 0.08594 | 192 | 0.114659774 | 0.031207586 |
| SNP_A.K_710381_4_8339403    | 4  | 8339403  | 1.63E-05 | 0.36458 | 192 | 0.114633981 | 0.031207586 |
| SNP_A.K_1814063_11_8597610  | 11 | 8597610  | 1.64E-05 | 0.16406 | 192 | 0.114619359 | 0.031207586 |
| SNP_A.K_727818_4_12215577   | 4  | 12215577 | 1.64E-05 | 0.20313 | 192 | 0.114586127 | 0.031207586 |
| SNP_A.K_1310431_7_26333039  | 7  | 26333039 | 1.64E-05 | 0.11198 | 192 | 0.114569242 | 0.031207586 |
| SNP_A.K_1813731_11_8574588  | 11 | 8574588  | 1.64E-05 | 0.16927 | 192 | 0.114561358 | 0.031207586 |
| SNP_A.K_1813943_11_8589370  | 11 | 8589370  | 1.65E-05 | 0.16927 | 192 | 0.114551508 | 0.031207586 |
| SNP_A.K_710088_4_8315732    | 4  | 8315732  | 1.65E-05 | 0.38021 | 192 | 0.114488987 | 0.031207586 |
| SNP_A.K_1814297_11_8612075  | 11 | 8612075  | 1.66E-05 | 0.16927 | 192 | 0.114484055 | 0.031207586 |
| SNP_A.K_1812420_11_8416383  | 11 | 8416383  | 1.66E-05 | 0.1875  | 192 | 0.114475124 | 0.031207586 |
| SNP_A.K_709052_4_8215598    | 4  | 8215598  | 1.66E-05 | 0.11458 | 192 | 0.114474997 | 0.031207586 |
| SNP_A.K_1551913_9_9132049   | 9  | 9132049  | 1.66E-05 | 0.27083 | 192 | 0.114467878 | 0.031207586 |

|                             |    |          |          |         |     |             |             |
|-----------------------------|----|----------|----------|---------|-----|-------------|-------------|
| SNP_A.K_725263_4_11773621   | 4  | 11773621 | 1.66E-05 | 0.11198 | 192 | 0.114462633 | 0.031207586 |
| SNP_A.K_1814263_11_8610879  | 11 | 8610879  | 1.66E-05 | 0.16406 | 192 | 0.114462584 | 0.031207586 |
| SNP_A.K_1552885_9_9223861   | 9  | 9223861  | 1.66E-05 | 0.26042 | 192 | 0.11446145  | 0.031207586 |
| SNP_A.K_1813655_11_8564618  | 11 | 8564618  | 1.66E-05 | 0.16406 | 192 | 0.114458892 | 0.031207586 |
| SNP_A.K_1813710_11_8568799  | 11 | 8568799  | 1.66E-05 | 0.16406 | 192 | 0.114450245 | 0.031207586 |
| SNP_A.K_1814157_11_8604017  | 11 | 8604017  | 1.66E-05 | 0.16406 | 192 | 0.114450245 | 0.031207586 |
| SNP_A.K_1814171_11_8604636  | 11 | 8604636  | 1.66E-05 | 0.16406 | 192 | 0.114450245 | 0.031207586 |
| SNP_A.K_1814215_11_8607924  | 11 | 8607924  | 1.66E-05 | 0.16406 | 192 | 0.114450245 | 0.031207586 |
| SNP_A.K_1813907_11_8587148  | 11 | 8587148  | 1.66E-05 | 0.16406 | 192 | 0.114450245 | 0.031207586 |
| SNP_A.K_1815263_11_8828450  | 11 | 8828450  | 1.66E-05 | 0.16406 | 192 | 0.114450245 | 0.031207586 |
| SNP_A.K_1812136_11_8382229  | 11 | 8382229  | 1.66E-05 | 0.16406 | 192 | 0.114423913 | 0.031207586 |
| SNP_A.K_708929_4_8150353    | 4  | 8150353  | 1.66E-05 | 0.22135 | 192 | 0.114422326 | 0.031207586 |
| SNP_A.K_726055_4_11897120   | 4  | 11897120 | 1.67E-05 | 0.25781 | 192 | 0.114414498 | 0.031207586 |
| SNP_A.K_1552838_9_9221010   | 9  | 9221010  | 1.67E-05 | 0.1276  | 192 | 0.114414199 | 0.031207586 |
| SNP_A.K_1782951_11_3523512  | 11 | 3523512  | 1.67E-05 | 0.03646 | 192 | 0.114407098 | 0.031207586 |
| SNP_A.K_725285_4_11781186   | 4  | 11781186 | 1.67E-05 | 0.11458 | 192 | 0.11437895  | 0.03125874  |
| SNP_A.K_1813379_11_8535300  | 11 | 8535300  | 1.68E-05 | 0.14323 | 192 | 0.114306313 | 0.031427956 |
| SNP_A.K_1552846_9_9222184   | 9  | 9222184  | 1.68E-05 | 0.20052 | 192 | 0.114299128 | 0.031427956 |
| SNP_A.K_672649_4_268874     | 4  | 268874   | 1.69E-05 | 0.07813 | 192 | 0.114286997 | 0.031434147 |
| SNP_A.K_1813797_11_8579062  | 11 | 8579062  | 1.69E-05 | 0.17448 | 192 | 0.114248716 | 0.031514558 |
| SNP_A.K_709292_4_8246367    | 4  | 8246367  | 1.70E-05 | 0.13021 | 192 | 0.114222466 | 0.031560959 |
| SNP_A.K_709026_4_8213700    | 4  | 8213700  | 1.70E-05 | 0.07292 | 192 | 0.114177005 | 0.03166224  |
| SNP_A.K_725291_4_11782974   | 4  | 11782974 | 1.71E-05 | 0.11458 | 192 | 0.114152813 | 0.031703036 |
| SNP_A.K_708992_4_8212378    | 4  | 8212378  | 1.72E-05 | 0.07292 | 192 | 0.114093391 | 0.031844895 |
| SNP_A.K_705469_4_6566546    | 4  | 6566546  | 1.72E-05 | 0.17448 | 192 | 0.114067991 | 0.031889456 |
| SNP_A.K_693757_4_5059137    | 4  | 5059137  | 1.74E-05 | 0.17448 | 192 | 0.113946028 | 0.032213368 |
| SNP_A.K_253334_1_40883725   | 1  | 40883725 | 1.75E-05 | 0.3151  | 192 | 0.113883954 | 0.032365375 |
| SNP_A.K_725867_4_11875373   | 4  | 11875373 | 1.75E-05 | 0.13281 | 192 | 0.113846271 | 0.03242422  |
| SNP_A.K_1922418_11_24286933 | 11 | 24286933 | 1.75E-05 | 0.02604 | 192 | 0.113844099 | 0.03242422  |
| SNP_A.K_730548_4_12699131   | 4  | 12699131 | 1.76E-05 | 0.21615 | 192 | 0.11382539  | 0.032450157 |
| SNP_A.K_727005_4_12068428   | 4  | 12068428 | 1.76E-05 | 0.06771 | 192 | 0.113781135 | 0.032551054 |
| SNP_A.K_253460_1_40893476   | 1  | 40893476 | 1.77E-05 | 0.3724  | 192 | 0.113749347 | 0.032615601 |
| SNP_A.K_730470_4_12695231   | 4  | 12695231 | 1.77E-05 | 0.21094 | 192 | 0.113726003 | 0.032653741 |
| SNP_A.K_709755_4_8284891    | 4  | 8284891  | 1.77E-05 | 0.07552 | 192 | 0.113716768 | 0.032653741 |
| SNP_A.K_1551942_9_9134079   | 9  | 9134079  | 1.78E-05 | 0.16667 | 192 | 0.113674942 | 0.032681314 |
| SNP_A.K_724287_4_11586157   | 4  | 11586157 | 1.78E-05 | 0.21094 | 192 | 0.113662603 | 0.032681314 |
| SNP_A.K_1812701_11_8463412  | 11 | 8463412  | 1.79E-05 | 0.17188 | 192 | 0.113643615 | 0.032681314 |
| SNP_A.K_1815119_11_8805475  | 11 | 8805475  | 1.79E-05 | 0.16667 | 192 | 0.113616278 | 0.032681314 |
| SNP_A.K_726927_4_12057266   | 4  | 12057266 | 1.79E-05 | 0.21615 | 192 | 0.113605807 | 0.032681314 |
| SNP_A.K_1813274_11_8526818  | 11 | 8526818  | 1.80E-05 | 0.16667 | 192 | 0.113574327 | 0.032681314 |
| SNP_A.K_1551917_9_9132096   | 9  | 9132096  | 1.80E-05 | 0.26823 | 192 | 0.113527433 | 0.032681314 |
| SNP_A.K_708562_4_8061486    | 4  | 8061486  | 1.81E-05 | 0.07552 | 192 | 0.113521923 | 0.032681314 |
| SNP_A.K_709706_4_8282569    | 4  | 8282569  | 1.81E-05 | 0.07813 | 192 | 0.113496496 | 0.032681314 |
| SNP_A.K_1812816_11_8471166  | 11 | 8471166  | 1.81E-05 | 0.17188 | 192 | 0.113496239 | 0.032681314 |
| SNP_A.K_1551884_9_9131043   | 9  | 9131043  | 1.81E-05 | 0.27865 | 192 | 0.113483137 | 0.032681314 |
| SNP_A.K_613984_3_26751295   | 3  | 26751295 | 1.82E-05 | 0.16406 | 192 | 0.113426218 | 0.032681314 |
| SNP_A.K_1814689_11_8769690  | 11 | 8769690  | 1.82E-05 | 0.17188 | 192 | 0.113417904 | 0.032681314 |
| SNP_A.K_1814691_11_8769712  | 11 | 8769712  | 1.82E-05 | 0.17188 | 192 | 0.113416433 | 0.032681314 |
| SNP_A.K_1812430_11_8418154  | 11 | 8418154  | 1.83E-05 | 0.17188 | 192 | 0.113399294 | 0.032681314 |
| SNP_A.K_724244_4_11583169   | 4  | 11583169 | 1.83E-05 | 0.25521 | 192 | 0.113398602 | 0.032681314 |

|                            |    |          |          |         |     |             |             |
|----------------------------|----|----------|----------|---------|-----|-------------|-------------|
| SNP_A.K_1813859_11_8583551 | 11 | 8583551  | 1.83E-05 | 0.17188 | 192 | 0.113373553 | 0.032681314 |
| SNP_A.K_1028785_6_10683483 | 6  | 10683483 | 1.83E-05 | 0.03646 | 192 | 0.113369594 | 0.032681314 |
| SNP_A.K_709550_4_8273583   | 4  | 8273583  | 1.83E-05 | 0.17188 | 192 | 0.113365824 | 0.032681314 |
| SNP_A.K_1813997_11_8594883 | 11 | 8594883  | 1.83E-05 | 0.16667 | 192 | 0.113356991 | 0.032681314 |
| SNP_A.K_1814150_11_8603677 | 11 | 8603677  | 1.83E-05 | 0.16667 | 192 | 0.113356991 | 0.032681314 |
| SNP_A.K_1814271_11_8611080 | 11 | 8611080  | 1.83E-05 | 0.16667 | 192 | 0.113356991 | 0.032681314 |
| SNP_A.K_1813898_11_8586669 | 11 | 8586669  | 1.83E-05 | 0.16667 | 192 | 0.113356991 | 0.032681314 |
| SNP_A.K_1814512_11_8759802 | 11 | 8759802  | 1.83E-05 | 0.16667 | 192 | 0.113356991 | 0.032681314 |
| SNP_A.K_1812466_11_8439678 | 11 | 8439678  | 1.83E-05 | 0.16667 | 192 | 0.113354287 | 0.032681314 |
| SNP_A.K_726002_4_11894055  | 4  | 11894055 | 1.83E-05 | 0.1276  | 192 | 0.113353732 | 0.032681314 |
| SNP_A.K_1814208_11_8607487 | 11 | 8607487  | 1.84E-05 | 0.16667 | 192 | 0.113338007 | 0.032681314 |
| SNP_A.K_1814601_11_8763765 | 11 | 8763765  | 1.84E-05 | 0.16667 | 192 | 0.113331378 | 0.032681314 |
| SNP_A.K_1814686_11_8769295 | 11 | 8769295  | 1.84E-05 | 0.16667 | 192 | 0.113325832 | 0.032681314 |
| SNP_A.K_1812830_11_8472220 | 11 | 8472220  | 1.84E-05 | 0.16667 | 192 | 0.113322298 | 0.032681314 |
| SNP_A.K_253228_1_40876601  | 1  | 40876601 | 1.85E-05 | 0.42708 | 192 | 0.113263018 | 0.032681314 |
| SNP_A.K_708695_4_8086917   | 4  | 8086917  | 1.85E-05 | 0.07031 | 192 | 0.113246762 | 0.032681314 |
| SNP_A.K_708699_4_8087095   | 4  | 8087095  | 1.85E-05 | 0.07031 | 192 | 0.113246762 | 0.032681314 |
| SNP_A.K_708915_4_8124997   | 4  | 8124997  | 1.85E-05 | 0.07031 | 192 | 0.113246762 | 0.032681314 |
| SNP_A.K_708921_4_8125451   | 4  | 8125451  | 1.85E-05 | 0.07031 | 192 | 0.113246762 | 0.032681314 |
| SNP_A.K_709209_4_8239090   | 4  | 8239090  | 1.85E-05 | 0.07031 | 192 | 0.113246762 | 0.032681314 |
| SNP_A.K_709746_4_8284640   | 4  | 8284640  | 1.85E-05 | 0.07031 | 192 | 0.113246762 | 0.032681314 |
| SNP_A.K_708612_4_8064067   | 4  | 8064067  | 1.85E-05 | 0.07031 | 192 | 0.113246762 | 0.032681314 |
| SNP_A.K_708613_4_8064081   | 4  | 8064081  | 1.85E-05 | 0.07031 | 192 | 0.113246762 | 0.032681314 |
| SNP_A.K_708700_4_8087148   | 4  | 8087148  | 1.85E-05 | 0.07031 | 192 | 0.113246762 | 0.032681314 |
| SNP_A.K_708701_4_8087151   | 4  | 8087151  | 1.85E-05 | 0.07031 | 192 | 0.113246762 | 0.032681314 |
| SNP_A.K_708702_4_8087181   | 4  | 8087181  | 1.85E-05 | 0.07031 | 192 | 0.113246762 | 0.032681314 |
| SNP_A.K_708703_4_8087285   | 4  | 8087285  | 1.85E-05 | 0.07031 | 192 | 0.113246762 | 0.032681314 |
| SNP_A.K_708914_4_8124990   | 4  | 8124990  | 1.85E-05 | 0.07031 | 192 | 0.113246762 | 0.032681314 |
| SNP_A.K_709145_4_8234002   | 4  | 8234002  | 1.85E-05 | 0.07031 | 192 | 0.113246762 | 0.032681314 |
| SNP_A.K_709385_4_8263322   | 4  | 8263322  | 1.85E-05 | 0.07031 | 192 | 0.113246762 | 0.032681314 |
| SNP_A.K_709386_4_8263378   | 4  | 8263378  | 1.85E-05 | 0.07031 | 192 | 0.113246762 | 0.032681314 |
| SNP_A.K_709685_4_8281044   | 4  | 8281044  | 1.85E-05 | 0.07031 | 192 | 0.113246762 | 0.032681314 |
| SNP_A.K_1814857_11_8783220 | 11 | 8783220  | 1.85E-05 | 0.17188 | 192 | 0.113232238 | 0.032687535 |
| SNP_A.K_364186_2_16502487  | 2  | 16502487 | 1.85E-05 | 0.08073 | 192 | 0.113225875 | 0.032687535 |
| SNP_A.K_1814881_11_8784076 | 11 | 8784076  | 1.86E-05 | 0.17188 | 192 | 0.113201345 | 0.032712761 |
| SNP_A.K_1812365_11_8411055 | 11 | 8411055  | 1.86E-05 | 0.18229 | 192 | 0.113190009 | 0.032712761 |
| SNP_A.K_253471_1_40894488  | 1  | 40894488 | 1.86E-05 | 0.43229 | 192 | 0.113189222 | 0.032712761 |
| SNP_A.K_708584_4_8062818   | 4  | 8062818  | 1.86E-05 | 0.07552 | 192 | 0.113174825 | 0.032713545 |
| SNP_A.K_1813778_11_8576759 | 11 | 8576759  | 1.86E-05 | 0.16667 | 192 | 0.113170258 | 0.032713545 |
| SNP_A.K_1551899_9_9131434  | 9  | 9131434  | 1.87E-05 | 0.27865 | 192 | 0.113160505 | 0.032714776 |
| SNP_A.K_277541_2_2949744   | 2  | 2949744  | 1.88E-05 | 0.04688 | 192 | 0.11308179  | 0.032870253 |
| SNP_A.K_725255_4_11769797  | 4  | 11769797 | 1.89E-05 | 0.11458 | 192 | 0.113033236 | 0.032870253 |
| SNP_A.K_708999_4_8212549   | 4  | 8212549  | 1.89E-05 | 0.06771 | 192 | 0.113015432 | 0.032870253 |
| SNP_A.K_693921_4_5074737   | 4  | 5074737  | 1.89E-05 | 0.2474  | 192 | 0.113011493 | 0.032870253 |
| SNP_A.K_710172_4_8319193   | 4  | 8319193  | 1.90E-05 | 0.08333 | 192 | 0.112955715 | 0.032870253 |
| SNP_A.K_723324_4_11432817  | 4  | 11432817 | 1.90E-05 | 0.20573 | 192 | 0.112935536 | 0.032870253 |
| SNP_A.K_1812035_11_8372022 | 11 | 8372022  | 1.90E-05 | 0.17448 | 192 | 0.112929566 | 0.032870253 |
| SNP_A.K_253161_1_40869751  | 1  | 40869751 | 1.91E-05 | 0.42708 | 192 | 0.112883911 | 0.032870253 |
| SNP_A.K_726003_4_11894144  | 4  | 11894144 | 1.92E-05 | 0.11979 | 192 | 0.112870889 | 0.032870253 |
| SNP_A.K_685281_4_2452547   | 4  | 2452547  | 1.92E-05 | 0.0625  | 192 | 0.112855566 | 0.032870253 |

|                             |    |          |          |         |     |             |             |
|-----------------------------|----|----------|----------|---------|-----|-------------|-------------|
| SNP_A.K_253166_1_40870839   | 1  | 40870839 | 1.92E-05 | 0.42188 | 192 | 0.11285321  | 0.032870253 |
| SNP_A.K_1813772_11_8576545  | 11 | 8576545  | 1.92E-05 | 0.16927 | 192 | 0.112847019 | 0.032870253 |
| SNP_A.K_708968_4_8210955    | 4  | 8210955  | 1.93E-05 | 0.1224  | 192 | 0.112783934 | 0.032870253 |
| SNP_A.K_726647_4_12028645   | 4  | 12028645 | 1.93E-05 | 0.07031 | 192 | 0.112773958 | 0.032870253 |
| SNP_A.K_724210_4_11580714   | 4  | 11580714 | 1.94E-05 | 0.11198 | 192 | 0.112738825 | 0.032870253 |
| SNP_A.K_730746_4_12726533   | 4  | 12726533 | 1.94E-05 | 0.22656 | 192 | 0.112738185 | 0.032870253 |
| SNP_A.K_253195_1_40873317   | 1  | 40873317 | 1.94E-05 | 0.43229 | 192 | 0.112733485 | 0.032870253 |
| SNP_A.K_1744592_10_18873245 | 10 | 18873245 | 1.94E-05 | 0.07813 | 192 | 0.112703301 | 0.032870253 |
| SNP_A.K_707035_4_6997500    | 4  | 6997500  | 1.95E-05 | 0.23177 | 192 | 0.112696029 | 0.032870253 |
| SNP_A.K_709574_4_8274366    | 4  | 8274366  | 1.95E-05 | 0.11458 | 192 | 0.112643672 | 0.032870253 |
| SNP_A.K_727119_4_12082758   | 4  | 12082758 | 1.96E-05 | 0.21094 | 192 | 0.112623004 | 0.032870253 |
| SNP_A.K_1552850_9_9222268   | 9  | 9222268  | 1.97E-05 | 0.21094 | 192 | 0.112560925 | 0.032870253 |
| SNP_A.K_709006_4_8212655    | 4  | 8212655  | 1.97E-05 | 0.07292 | 192 | 0.112556218 | 0.032870253 |
| SNP_A.K_709007_4_8212657    | 4  | 8212657  | 1.97E-05 | 0.07292 | 192 | 0.112556218 | 0.032870253 |
| SNP_A.K_1813965_11_8590897  | 11 | 8590897  | 1.97E-05 | 0.17969 | 192 | 0.112535036 | 0.032870253 |
| SNP_A.K_615449_3_26867985   | 3  | 26867985 | 1.98E-05 | 0.17969 | 192 | 0.112486933 | 0.032870253 |
| SNP_A.K_1812714_11_8464100  | 11 | 8464100  | 1.98E-05 | 0.16927 | 192 | 0.112485133 | 0.032870253 |
| SNP_A.K_708891_4_8122090    | 4  | 8122090  | 1.99E-05 | 0.07552 | 192 | 0.112470226 | 0.032870253 |
| SNP_A.K_288569_2_5043799    | 2  | 5043799  | 1.99E-05 | 0.01302 | 192 | 0.112469338 | 0.032870253 |
| SNP_A.K_288586_2_5045547    | 2  | 5045547  | 1.99E-05 | 0.01302 | 192 | 0.112469338 | 0.032870253 |
| SNP_A.K_288620_2_5052058    | 2  | 5052058  | 1.99E-05 | 0.01302 | 192 | 0.112469338 | 0.032870253 |
| SNP_A.K_288621_2_5052061    | 2  | 5052061  | 1.99E-05 | 0.01302 | 192 | 0.112469338 | 0.032870253 |
| SNP_A.K_288631_2_5052285    | 2  | 5052285  | 1.99E-05 | 0.01302 | 192 | 0.112469338 | 0.032870253 |
| SNP_A.K_288666_2_5054896    | 2  | 5054896  | 1.99E-05 | 0.01302 | 192 | 0.112469338 | 0.032870253 |
| SNP_A.K_288668_2_5054968    | 2  | 5054968  | 1.99E-05 | 0.01302 | 192 | 0.112469338 | 0.032870253 |
| SNP_A.K_288670_2_5055022    | 2  | 5055022  | 1.99E-05 | 0.01302 | 192 | 0.112469338 | 0.032870253 |
| SNP_A.K_288671_2_5055034    | 2  | 5055034  | 1.99E-05 | 0.01302 | 192 | 0.112469338 | 0.032870253 |
| SNP_A.K_288676_2_5055206    | 2  | 5055206  | 1.99E-05 | 0.01302 | 192 | 0.112469338 | 0.032870253 |
| SNP_A.K_288680_2_5055487    | 2  | 5055487  | 1.99E-05 | 0.01302 | 192 | 0.112469338 | 0.032870253 |
| SNP_A.K_288689_2_5057033    | 2  | 5057033  | 1.99E-05 | 0.01302 | 192 | 0.112469338 | 0.032870253 |
| SNP_A.K_288690_2_5057099    | 2  | 5057099  | 1.99E-05 | 0.01302 | 192 | 0.112469338 | 0.032870253 |
| SNP_A.K_288707_2_5060504    | 2  | 5060504  | 1.99E-05 | 0.01302 | 192 | 0.112469338 | 0.032870253 |
| SNP_A.K_288711_2_5061280    | 2  | 5061280  | 1.99E-05 | 0.01302 | 192 | 0.112469338 | 0.032870253 |
| SNP_A.K_288716_2_5061728    | 2  | 5061728  | 1.99E-05 | 0.01302 | 192 | 0.112469338 | 0.032870253 |
| SNP_A.K_288576_2_5044298    | 2  | 5044298  | 1.99E-05 | 0.01302 | 192 | 0.112469338 | 0.032870253 |
| SNP_A.K_288587_2_5045562    | 2  | 5045562  | 1.99E-05 | 0.01302 | 192 | 0.112469338 | 0.032870253 |
| SNP_A.K_288588_2_5045773    | 2  | 5045773  | 1.99E-05 | 0.01302 | 192 | 0.112469338 | 0.032870253 |
| SNP_A.K_288592_2_5045945    | 2  | 5045945  | 1.99E-05 | 0.01302 | 192 | 0.112469338 | 0.032870253 |
| SNP_A.K_288601_2_5046597    | 2  | 5046597  | 1.99E-05 | 0.01302 | 192 | 0.112469338 | 0.032870253 |
| SNP_A.K_288609_2_5051563    | 2  | 5051563  | 1.99E-05 | 0.01302 | 192 | 0.112469338 | 0.032870253 |
| SNP_A.K_288610_2_5051601    | 2  | 5051601  | 1.99E-05 | 0.01302 | 192 | 0.112469338 | 0.032870253 |
| SNP_A.K_288612_2_5051623    | 2  | 5051623  | 1.99E-05 | 0.01302 | 192 | 0.112469338 | 0.032870253 |
| SNP_A.K_288614_2_5051672    | 2  | 5051672  | 1.99E-05 | 0.01302 | 192 | 0.112469338 | 0.032870253 |
| SNP_A.K_288624_2_5052122    | 2  | 5052122  | 1.99E-05 | 0.01302 | 192 | 0.112469338 | 0.032870253 |
| SNP_A.K_288625_2_5052136    | 2  | 5052136  | 1.99E-05 | 0.01302 | 192 | 0.112469338 | 0.032870253 |
| SNP_A.K_288626_2_5052163    | 2  | 5052163  | 1.99E-05 | 0.01302 | 192 | 0.112469338 | 0.032870253 |
| SNP_A.K_288627_2_5052180    | 2  | 5052180  | 1.99E-05 | 0.01302 | 192 | 0.112469338 | 0.032870253 |
| SNP_A.K_288634_2_5052472    | 2  | 5052472  | 1.99E-05 | 0.01302 | 192 | 0.112469338 | 0.032870253 |
| SNP_A.K_288635_2_5052511    | 2  | 5052511  | 1.99E-05 | 0.01302 | 192 | 0.112469338 | 0.032870253 |
| SNP_A.K_288637_2_5052644    | 2  | 5052644  | 1.99E-05 | 0.01302 | 192 | 0.112469338 | 0.032870253 |

|                            |    |          |          |         |     |             |             |
|----------------------------|----|----------|----------|---------|-----|-------------|-------------|
| SNP_A.K_288662_2_5054600   | 2  | 5054600  | 1.99E-05 | 0.01302 | 192 | 0.112469338 | 0.032870253 |
| SNP_A.K_288665_2_5054890   | 2  | 5054890  | 1.99E-05 | 0.01302 | 192 | 0.112469338 | 0.032870253 |
| SNP_A.K_288667_2_5054899   | 2  | 5054899  | 1.99E-05 | 0.01302 | 192 | 0.112469338 | 0.032870253 |
| SNP_A.K_288672_2_5055049   | 2  | 5055049  | 1.99E-05 | 0.01302 | 192 | 0.112469338 | 0.032870253 |
| SNP_A.K_288677_2_5055357   | 2  | 5055357  | 1.99E-05 | 0.01302 | 192 | 0.112469338 | 0.032870253 |
| SNP_A.K_288678_2_5055402   | 2  | 5055402  | 1.99E-05 | 0.01302 | 192 | 0.112469338 | 0.032870253 |
| SNP_A.K_288679_2_5055415   | 2  | 5055415  | 1.99E-05 | 0.01302 | 192 | 0.112469338 | 0.032870253 |
| SNP_A.K_288684_2_5056206   | 2  | 5056206  | 1.99E-05 | 0.01302 | 192 | 0.112469338 | 0.032870253 |
| SNP_A.K_288685_2_5056259   | 2  | 5056259  | 1.99E-05 | 0.01302 | 192 | 0.112469338 | 0.032870253 |
| SNP_A.K_1814840_11_8781444 | 11 | 8781444  | 1.99E-05 | 0.16927 | 192 | 0.112424779 | 0.032870253 |
| SNP_A.K_724312_4_11587850  | 4  | 11587850 | 1.99E-05 | 0.1224  | 192 | 0.112420474 | 0.032870253 |
| SNP_A.K_1813944_11_8589401 | 11 | 8589401  | 2.01E-05 | 0.17448 | 192 | 0.112361443 | 0.032870253 |
| SNP_A.K_709204_4_8238794   | 4  | 8238794  | 2.01E-05 | 0.07552 | 192 | 0.112345825 | 0.032870253 |
| SNP_A.K_973805_6_619845    | 6  | 619845   | 2.02E-05 | 0.13542 | 192 | 0.112307009 | 0.032870253 |
| SNP_A.K_1814287_11_8611726 | 11 | 8611726  | 2.02E-05 | 0.16927 | 192 | 0.11229985  | 0.032870253 |
| SNP_A.K_1812807_11_8470329 | 11 | 8470329  | 2.02E-05 | 0.16927 | 192 | 0.112297251 | 0.032870253 |
| SNP_A.K_1814266_11_8611016 | 11 | 8611016  | 2.02E-05 | 0.16927 | 192 | 0.112272073 | 0.032870253 |
| SNP_A.K_709392_4_8264359   | 4  | 8264359  | 2.03E-05 | 0.07552 | 192 | 0.112248912 | 0.032870253 |
| SNP_A.K_709075_4_8217405   | 4  | 8217405  | 2.03E-05 | 0.07292 | 192 | 0.112246371 | 0.032870253 |
| SNP_A.K_1812050_11_8373086 | 11 | 8373086  | 2.03E-05 | 0.16927 | 192 | 0.112241043 | 0.032870253 |
| SNP_A.K_1814319_11_8613260 | 11 | 8613260  | 2.03E-05 | 0.16927 | 192 | 0.112237551 | 0.032870253 |
| SNP_A.K_708378_4_8041577   | 4  | 8041577  | 2.03E-05 | 0.07813 | 192 | 0.112221852 | 0.032870253 |
| SNP_A.K_708950_4_8208164   | 4  | 8208164  | 2.03E-05 | 0.11458 | 192 | 0.112220971 | 0.032870253 |
| SNP_A.K_1812738_11_8464976 | 11 | 8464976  | 2.03E-05 | 0.16927 | 192 | 0.112217565 | 0.032870253 |
| SNP_A.K_1812536_11_8448556 | 11 | 8448556  | 2.03E-05 | 0.16927 | 192 | 0.112215701 | 0.032870253 |
| SNP_A.K_1813684_11_8566024 | 11 | 8566024  | 2.03E-05 | 0.16927 | 192 | 0.112214443 | 0.032870253 |
| SNP_A.K_730515_4_12697672  | 4  | 12697672 | 2.03E-05 | 0.22656 | 192 | 0.1122003   | 0.032870253 |
| SNP_A.K_1815094_11_8803263 | 11 | 8803263  | 2.04E-05 | 0.16927 | 192 | 0.112197206 | 0.032870253 |
| SNP_A.K_1813640_11_8563933 | 11 | 8563933  | 2.04E-05 | 0.16927 | 192 | 0.112171343 | 0.032870253 |
| SNP_A.K_1378502_8_8710992  | 8  | 8710992  | 2.04E-05 | 0.2526  | 192 | 0.112163705 | 0.032870253 |
| SNP_A.K_253515_1_40899218  | 1  | 40899218 | 2.04E-05 | 0.15885 | 192 | 0.11216152  | 0.032870253 |
| SNP_A.K_709361_4_8258822   | 4  | 8258822  | 2.04E-05 | 0.07552 | 192 | 0.11216103  | 0.032870253 |
| SNP_A.K_726199_4_11928183  | 4  | 11928183 | 2.04E-05 | 0.25    | 192 | 0.112144937 | 0.032870253 |
| SNP_A.K_287317_2_4877873   | 2  | 4877873  | 2.06E-05 | 0.01302 | 192 | 0.112069958 | 0.032870253 |
| SNP_A.K_287329_2_4879115   | 2  | 4879115  | 2.06E-05 | 0.01302 | 192 | 0.112069958 | 0.032870253 |
| SNP_A.K_287793_2_4941146   | 2  | 4941146  | 2.06E-05 | 0.01302 | 192 | 0.112069958 | 0.032870253 |
| SNP_A.K_287821_2_4945921   | 2  | 4945921  | 2.06E-05 | 0.01302 | 192 | 0.112069958 | 0.032870253 |
| SNP_A.K_287841_2_4947679   | 2  | 4947679  | 2.06E-05 | 0.01302 | 192 | 0.112069958 | 0.032870253 |
| SNP_A.K_287881_2_4951805   | 2  | 4951805  | 2.06E-05 | 0.01302 | 192 | 0.112069958 | 0.032870253 |
| SNP_A.K_287883_2_4952868   | 2  | 4952868  | 2.06E-05 | 0.01302 | 192 | 0.112069958 | 0.032870253 |
| SNP_A.K_287885_2_4953550   | 2  | 4953550  | 2.06E-05 | 0.01302 | 192 | 0.112069958 | 0.032870253 |
| SNP_A.K_287918_2_4961246   | 2  | 4961246  | 2.06E-05 | 0.01302 | 192 | 0.112069958 | 0.032870253 |
| SNP_A.K_287919_2_4961262   | 2  | 4961262  | 2.06E-05 | 0.01302 | 192 | 0.112069958 | 0.032870253 |
| SNP_A.K_288057_2_4979972   | 2  | 4979972  | 2.06E-05 | 0.01302 | 192 | 0.112069958 | 0.032870253 |
| SNP_A.K_288058_2_4980170   | 2  | 4980170  | 2.06E-05 | 0.01302 | 192 | 0.112069958 | 0.032870253 |
| SNP_A.K_288065_2_4982311   | 2  | 4982311  | 2.06E-05 | 0.01302 | 192 | 0.112069958 | 0.032870253 |
| SNP_A.K_288066_2_4982752   | 2  | 4982752  | 2.06E-05 | 0.01302 | 192 | 0.112069958 | 0.032870253 |
| SNP_A.K_288072_2_4983228   | 2  | 4983228  | 2.06E-05 | 0.01302 | 192 | 0.112069958 | 0.032870253 |
| SNP_A.K_288082_2_4985548   | 2  | 4985548  | 2.06E-05 | 0.01302 | 192 | 0.112069958 | 0.032870253 |
| SNP_A.K_287468_2_4893030   | 2  | 4893030  | 2.06E-05 | 0.01302 | 192 | 0.112069958 | 0.032870253 |

|                            |    |          |          |         |     |             |             |
|----------------------------|----|----------|----------|---------|-----|-------------|-------------|
| SNP_A.K_287784_2_4938963   | 2  | 4938963  | 2.06E-05 | 0.01302 | 192 | 0.112069958 | 0.032870253 |
| SNP_A.K_287794_2_4941196   | 2  | 4941196  | 2.06E-05 | 0.01302 | 192 | 0.112069958 | 0.032870253 |
| SNP_A.K_287825_2_4946275   | 2  | 4946275  | 2.06E-05 | 0.01302 | 192 | 0.112069958 | 0.032870253 |
| SNP_A.K_287878_2_4951756   | 2  | 4951756  | 2.06E-05 | 0.01302 | 192 | 0.112069958 | 0.032870253 |
| SNP_A.K_288049_2_4977951   | 2  | 4977951  | 2.06E-05 | 0.01302 | 192 | 0.112069958 | 0.032870253 |
| SNP_A.K_288074_2_4984256   | 2  | 4984256  | 2.06E-05 | 0.01302 | 192 | 0.112069958 | 0.032870253 |
| SNP_A.K_724654_4_11653634  | 4  | 11653634 | 2.06E-05 | 0.11719 | 192 | 0.112067356 | 0.032870253 |
| SNP_A.K_721632_4_11010253  | 4  | 11010253 | 2.07E-05 | 0.22656 | 192 | 0.112029389 | 0.0329373   |
| SNP_A.K_730456_4_12694654  | 4  | 12694654 | 2.07E-05 | 0.03125 | 192 | 0.112023687 | 0.0329373   |
| SNP_A.K_708720_4_8089085   | 4  | 8089085  | 2.07E-05 | 0.08333 | 192 | 0.112013273 | 0.0329373   |
| SNP_A.K_253452_1_40892280  | 1  | 40892280 | 2.07E-05 | 0.42969 | 192 | 0.112003465 | 0.0329373   |
| SNP_A.K_708707_4_8087954   | 4  | 8087954  | 2.07E-05 | 0.07552 | 192 | 0.112002484 | 0.0329373   |
| SNP_A.K_1812366_11_8411150 | 11 | 8411150  | 2.08E-05 | 0.17969 | 192 | 0.111978392 | 0.032979172 |
| SNP_A.K_708964_4_8209986   | 4  | 8209986  | 2.08E-05 | 0.13021 | 192 | 0.111970602 | 0.032979172 |
| SNP_A.K_685845_4_2517504   | 4  | 2517504  | 2.08E-05 | 0.05729 | 192 | 0.111945832 | 0.032979172 |
| SNP_A.K_685846_4_2517506   | 4  | 2517506  | 2.08E-05 | 0.05729 | 192 | 0.111945832 | 0.032979172 |
| SNP_A.K_708759_4_8111255   | 4  | 8111255  | 2.08E-05 | 0.07552 | 192 | 0.111938493 | 0.032979172 |
| SNP_A.K_253160_1_40869735  | 1  | 40869735 | 2.08E-05 | 0.42448 | 192 | 0.111937851 | 0.032979172 |
| SNP_A.K_253498_1_40898211  | 1  | 40898211 | 2.10E-05 | 0.15885 | 192 | 0.111871091 | 0.033153639 |
| SNP_A.K_708640_4_8069362   | 4  | 8069362  | 2.10E-05 | 0.07552 | 192 | 0.111844244 | 0.033208986 |
| SNP_A.K_724800_4_11682810  | 4  | 11682810 | 2.11E-05 | 0.21354 | 192 | 0.111778886 | 0.033376577 |
| SNP_A.K_1550890_9_9016684  | 9  | 9016684  | 2.11E-05 | 0.26042 | 192 | 0.111771799 | 0.033376577 |
| SNP_A.K_708794_4_8114574   | 4  | 8114574  | 2.13E-05 | 0.07552 | 192 | 0.111709363 | 0.03353796  |
| SNP_A.K_708549_4_8061152   | 4  | 8061152  | 2.13E-05 | 0.07552 | 192 | 0.111701712 | 0.03353796  |
| SNP_A.K_708653_4_8071288   | 4  | 8071288  | 2.14E-05 | 0.07552 | 192 | 0.111656043 | 0.03362587  |
| SNP_A.K_708656_4_8071665   | 4  | 8071665  | 2.14E-05 | 0.07552 | 192 | 0.111656043 | 0.03362587  |
| SNP_A.K_708910_4_8124228   | 4  | 8124228  | 2.14E-05 | 0.07552 | 192 | 0.111628034 | 0.033685706 |
| SNP_A.K_1813549_11_8555046 | 11 | 8555046  | 2.15E-05 | 0.17188 | 192 | 0.111603473 | 0.033687992 |
| SNP_A.K_687432_4_3530754   | 4  | 3530754  | 2.15E-05 | 0.125   | 192 | 0.11160323  | 0.033687992 |
| SNP_A.K_708122_4_7543134   | 4  | 7543134  | 2.15E-05 | 0.21615 | 192 | 0.111602263 | 0.033687992 |
| SNP_A.K_253439_1_40890909  | 1  | 40890909 | 2.15E-05 | 0.23958 | 192 | 0.111585497 | 0.033713714 |
| SNP_A.K_1813718_11_8569792 | 11 | 8569792  | 2.15E-05 | 0.17188 | 192 | 0.111575054 | 0.033720187 |
| SNP_A.K_1812897_11_8477811 | 11 | 8477811  | 2.16E-05 | 0.17188 | 192 | 0.111516681 | 0.033873234 |
| SNP_A.K_709558_4_8273713   | 4  | 8273713  | 2.17E-05 | 0.08073 | 192 | 0.111498865 | 0.033902383 |
| SNP_A.K_725333_4_11794539  | 4  | 11794539 | 2.17E-05 | 0.10938 | 192 | 0.111474009 | 0.033953198 |
| SNP_A.K_1813598_11_8559126 | 11 | 8559126  | 2.18E-05 | 0.17188 | 192 | 0.111458626 | 0.03397498  |
| SNP_A.K_709070_4_8216354   | 4  | 8216354  | 2.19E-05 | 0.07292 | 192 | 0.11140972  | 0.034100066 |
| SNP_A.K_310430_2_7728334   | 2  | 7728334  | 2.19E-05 | 0.375   | 192 | 0.111366893 | 0.034206821 |
| SNP_A.K_1813740_11_8574948 | 11 | 8574948  | 2.20E-05 | 0.17188 | 192 | 0.111348331 | 0.034238677 |
| SNP_A.K_708583_4_8062652   | 4  | 8062652  | 2.20E-05 | 0.07813 | 192 | 0.111321872 | 0.034295082 |
| SNP_A.K_709513_4_8271340   | 4  | 8271340  | 2.20E-05 | 0.07552 | 192 | 0.111311194 | 0.034300262 |
| SNP_A.K_725314_4_11792263  | 4  | 11792263 | 2.21E-05 | 0.11719 | 192 | 0.111277444 | 0.034346102 |
| SNP_A.K_709628_4_8278618   | 4  | 8278618  | 2.21E-05 | 0.22135 | 192 | 0.111275987 | 0.034346102 |
| SNP_A.K_253200_1_40873698  | 1  | 40873698 | 2.21E-05 | 0.43229 | 192 | 0.111272433 | 0.034346102 |
| SNP_A.K_709645_4_8279109   | 4  | 8279109  | 2.23E-05 | 0.07552 | 192 | 0.111207638 | 0.034522355 |
| SNP_A.K_708379_4_8041586   | 4  | 8041586  | 2.23E-05 | 0.07552 | 192 | 0.111170522 | 0.034598498 |
| SNP_A.K_1814636_11_8766498 | 11 | 8766498  | 2.23E-05 | 0.17188 | 192 | 0.111162892 | 0.034598498 |
| SNP_A.K_708722_4_8089099   | 4  | 8089099  | 2.24E-05 | 0.08333 | 192 | 0.111158624 | 0.034598498 |
| SNP_A.K_1814136_11_8602854 | 11 | 8602854  | 2.24E-05 | 0.17188 | 192 | 0.111133141 | 0.034627053 |
| SNP_A.K_1953653_12_3611534 | 12 | 3611534  | 2.24E-05 | 0.08073 | 192 | 0.111128873 | 0.034627053 |



|                            |    |          |          |         |     |             |             |
|----------------------------|----|----------|----------|---------|-----|-------------|-------------|
| SNP_A.K_1814751_11_8772409 | 11 | 8772409  | 2.24E-05 | 0.17188 | 192 | 0.111124894 | 0.034627053 |
| SNP_A.K_1814875_11_8783817 | 11 | 8783817  | 2.24E-05 | 0.17188 | 192 | 0.111115372 | 0.034630977 |
| SNP_A.K_724192_4_11579308  | 4  | 11579308 | 2.25E-05 | 0.11458 | 192 | 0.111082387 | 0.034630977 |
| SNP_A.K_1028960_6_10713119 | 6  | 10713119 | 2.25E-05 | 0.01302 | 192 | 0.111080482 | 0.034630977 |
| SNP_A.K_1028961_6_10714264 | 6  | 10714264 | 2.25E-05 | 0.01302 | 192 | 0.111080482 | 0.034630977 |
| SNP_A.K_1777242_11_2482507 | 11 | 2482507  | 2.25E-05 | 0.1901  | 192 | 0.111075309 | 0.034630977 |
| SNP_A.K_1812020_11_8371130 | 11 | 8371130  | 2.25E-05 | 0.17188 | 192 | 0.111069855 | 0.034630977 |
| SNP_A.K_709752_4_8284859   | 4  | 8284859  | 2.25E-05 | 0.07552 | 192 | 0.111066423 | 0.034630977 |
| SNP_A.K_1812151_11_8383055 | 11 | 8383055  | 2.26E-05 | 0.17448 | 192 | 0.111050128 | 0.034633833 |
| SNP_A.K_709136_4_8233299   | 4  | 8233299  | 2.26E-05 | 0.07552 | 192 | 0.111028546 | 0.034633833 |
| SNP_A.K_1814872_11_8783768 | 11 | 8783768  | 2.26E-05 | 0.17188 | 192 | 0.111026203 | 0.034633833 |
| SNP_A.K_705321_4_6545625   | 4  | 6545625  | 2.26E-05 | 0.17969 | 192 | 0.111025823 | 0.034633833 |
| SNP_A.K_1813804_11_8579976 | 11 | 8579976  | 2.26E-05 | 0.17448 | 192 | 0.111021684 | 0.034633833 |
| SNP_A.K_1814855_11_8783162 | 11 | 8783162  | 2.26E-05 | 0.17188 | 192 | 0.111016704 | 0.034633833 |
| SNP_A.K_726902_4_12055821  | 4  | 12055821 | 2.28E-05 | 0.26042 | 192 | 0.11096522  | 0.034770088 |
| SNP_A.K_1812396_11_8414208 | 11 | 8414208  | 2.29E-05 | 0.18229 | 192 | 0.110910041 | 0.034912428 |
| SNP_A.K_709835_4_8299235   | 4  | 8299235  | 2.29E-05 | 0.05469 | 192 | 0.11090389  | 0.034912428 |
| SNP_A.K_709284_4_8245685   | 4  | 8245685  | 2.30E-05 | 0.22656 | 192 | 0.11085723  | 0.035034554 |
| SNP_A.K_277435_2_2943367   | 2  | 2943367  | 2.30E-05 | 0.08333 | 192 | 0.110841805 | 0.035057838 |
| SNP_A.K_709751_4_8284749   | 4  | 8284749  | 2.30E-05 | 0.07813 | 192 | 0.11083174  | 0.035064133 |
| SNP_A.K_1310472_7_26337252 | 7  | 26337252 | 2.30E-05 | 0.14063 | 192 | 0.110822395 | 0.035068165 |
| SNP_A.K_253124_1_40862588  | 1  | 40862588 | 2.32E-05 | 0.32292 | 192 | 0.110745247 | 0.035288223 |
| SNP_A.K_1551936_9_9133820  | 9  | 9133820  | 2.32E-05 | 0.34896 | 192 | 0.110731255 | 0.035307174 |
| SNP_A.K_307048_2_7375415   | 2  | 7375415  | 2.33E-05 | 0.20052 | 192 | 0.110710578 | 0.035334508 |
| SNP_A.K_613493_3_26711137  | 3  | 26711137 | 2.33E-05 | 0.15885 | 192 | 0.110705173 | 0.035334508 |
| SNP_A.K_723729_4_11498524  | 4  | 11498524 | 2.33E-05 | 0.21875 | 192 | 0.110698558 | 0.035334508 |
| SNP_A.K_1777239_11_2482485 | 11 | 2482485  | 2.33E-05 | 0.1849  | 192 | 0.110678887 | 0.035371751 |
| SNP_A.K_1812559_11_8451697 | 11 | 8451697  | 2.34E-05 | 0.17448 | 192 | 0.110652734 | 0.035429849 |
| SNP_A.K_709692_4_8281511   | 4  | 8281511  | 2.35E-05 | 0.07813 | 192 | 0.110620782 | 0.035506712 |
| SNP_A.K_868729_5_4774933   | 5  | 4774933  | 2.36E-05 | 0.02604 | 192 | 0.110563449 | 0.035618016 |
| SNP_A.K_709736_4_8284382   | 4  | 8284382  | 2.36E-05 | 0.07813 | 192 | 0.110557551 | 0.035618016 |
| SNP_A.K_709398_4_8265000   | 4  | 8265000  | 2.36E-05 | 0.11719 | 192 | 0.110556346 | 0.035618016 |
| SNP_A.K_708547_4_8061100   | 4  | 8061100  | 2.36E-05 | 0.07552 | 192 | 0.110554183 | 0.035618016 |
| SNP_A.K_1813743_11_8575019 | 11 | 8575019  | 2.36E-05 | 0.17969 | 192 | 0.110544405 | 0.035623762 |
| SNP_A.K_708561_4_8061468   | 4  | 8061468  | 2.37E-05 | 0.07552 | 192 | 0.110501462 | 0.035696225 |
| SNP_A.K_708991_4_8212370   | 4  | 8212370  | 2.37E-05 | 0.07813 | 192 | 0.110501173 | 0.035696225 |
| SNP_A.K_708980_4_8212115   | 4  | 8212115  | 2.37E-05 | 0.07552 | 192 | 0.110498019 | 0.035696225 |
| SNP_A.K_157019_1_24522971  | 1  | 24522971 | 2.39E-05 | 0.10677 | 192 | 0.110433177 | 0.035880613 |
| SNP_A.K_708792_4_8114534   | 4  | 8114534  | 2.39E-05 | 0.08073 | 192 | 0.11040425  | 0.035938423 |
| SNP_A.K_709664_4_8279660   | 4  | 8279660  | 2.39E-05 | 0.07031 | 192 | 0.110399481 | 0.035938423 |
| SNP_A.K_708783_4_8113709   | 4  | 8113709  | 2.41E-05 | 0.11458 | 192 | 0.110327942 | 0.036146072 |
| SNP_A.K_708666_4_8072070   | 4  | 8072070  | 2.41E-05 | 0.07813 | 192 | 0.110313057 | 0.036151301 |
| SNP_A.K_1812851_11_8473503 | 11 | 8473503  | 2.42E-05 | 0.17448 | 192 | 0.110300906 | 0.036151301 |
| SNP_A.K_708927_4_8126092   | 4  | 8126092  | 2.42E-05 | 0.08073 | 192 | 0.110297914 | 0.036151301 |
| SNP_A.K_725329_4_11794183  | 4  | 11794183 | 2.42E-05 | 0.11979 | 192 | 0.110294588 | 0.036151301 |
| SNP_A.K_1813270_11_8526576 | 11 | 8526576  | 2.42E-05 | 0.16927 | 192 | 0.110276613 | 0.036184241 |
| SNP_A.K_708939_4_8150815   | 4  | 8150815  | 2.43E-05 | 0.20573 | 192 | 0.110258239 | 0.036218538 |
| SNP_A.K_1552435_9_9176659  | 9  | 9176659  | 2.43E-05 | 0.22917 | 192 | 0.110248333 | 0.03622508  |
| SNP_A.K_724251_4_11583707  | 4  | 11583707 | 2.43E-05 | 0.28385 | 192 | 0.110219219 | 0.036279851 |
| SNP_A.K_708793_4_8114538   | 4  | 8114538  | 2.43E-05 | 0.07813 | 192 | 0.110215853 | 0.036279851 |

|                             |    |          |          |         |     |             |             |
|-----------------------------|----|----------|----------|---------|-----|-------------|-------------|
| SNP_A.K_1744588_10_18872954 | 10 | 18872954 | 2.44E-05 | 0.08594 | 192 | 0.110198189 | 0.036291333 |
| SNP_A.K_613333_3_26690871   | 3  | 26690871 | 2.44E-05 | 0.13021 | 192 | 0.110187621 | 0.036291333 |
| SNP_A.K_1697693_10_12770016 | 10 | 12770016 | 2.44E-05 | 0.20052 | 192 | 0.110182978 | 0.036291333 |
| SNP_A.K_709344_4_8250123    | 4  | 8250123  | 2.44E-05 | 0.21875 | 192 | 0.110180813 | 0.036291333 |
| SNP_A.K_1552843_9_9221520   | 9  | 9221520  | 2.45E-05 | 0.29688 | 192 | 0.110160838 | 0.036295289 |
| SNP_A.K_1552067_9_9142806   | 9  | 9142806  | 2.45E-05 | 0.30729 | 192 | 0.110157103 | 0.036295289 |
| SNP_A.K_708628_4_8066752    | 4  | 8066752  | 2.45E-05 | 0.07813 | 192 | 0.110150714 | 0.036295289 |
| SNP_A.K_1552120_9_9148626   | 9  | 9148626  | 2.45E-05 | 0.18229 | 192 | 0.110148153 | 0.036295289 |
| SNP_A.K_1813675_11_8565315  | 11 | 8565315  | 2.45E-05 | 0.15885 | 192 | 0.110137219 | 0.036295404 |
| SNP_A.K_1814634_11_8766328  | 11 | 8766328  | 2.45E-05 | 0.17448 | 192 | 0.110125321 | 0.036295404 |
| SNP_A.K_1813916_11_8587458  | 11 | 8587458  | 2.46E-05 | 0.16927 | 192 | 0.110118989 | 0.036295404 |
| SNP_A.K_1813777_11_8576720  | 11 | 8576720  | 2.46E-05 | 0.17969 | 192 | 0.110116752 | 0.036295404 |
| SNP_A.K_709629_4_8278643    | 4  | 8278643  | 2.46E-05 | 0.07813 | 192 | 0.110095154 | 0.036340736 |
| SNP_A.K_1814685_11_8769206  | 11 | 8769206  | 2.46E-05 | 0.16927 | 192 | 0.110084931 | 0.036348647 |
| SNP_A.K_1812053_11_8373667  | 11 | 8373667  | 2.47E-05 | 0.16927 | 192 | 0.110038491 | 0.03646886  |
| SNP_A.K_253216_1_40874633   | 1  | 40874633 | 2.48E-05 | 0.43229 | 192 | 0.110025586 | 0.03646886  |
| SNP_A.K_1813860_11_8583632  | 11 | 8583632  | 2.48E-05 | 0.18229 | 192 | 0.110025075 | 0.03646886  |
| SNP_A.K_708806_4_8114939    | 4  | 8114939  | 2.48E-05 | 0.08333 | 192 | 0.11000997  | 0.036493023 |
| SNP_A.K_1814344_11_8614167  | 11 | 8614167  | 2.48E-05 | 0.14063 | 192 | 0.109991237 | 0.036508317 |
| SNP_A.K_709433_4_8265906    | 4  | 8265906  | 2.49E-05 | 0.07552 | 192 | 0.109987973 | 0.036508317 |
| SNP_A.K_253211_1_40874522   | 1  | 40874522 | 2.49E-05 | 0.4349  | 192 | 0.109981489 | 0.036508317 |
| SNP_A.K_1814859_11_8783256  | 11 | 8783256  | 2.49E-05 | 0.17448 | 192 | 0.109971127 | 0.036508317 |
| SNP_A.K_253508_1_40898965   | 1  | 40898965 | 2.49E-05 | 0.17448 | 192 | 0.109961676 | 0.036508317 |
| SNP_A.K_727219_4_12095623   | 4  | 12095623 | 2.49E-05 | 0.21354 | 192 | 0.109953346 | 0.036508317 |
| SNP_A.K_730507_4_12697448   | 4  | 12697448 | 2.49E-05 | 0.23438 | 192 | 0.109950913 | 0.036508317 |
| SNP_A.K_1814900_11_8784687  | 11 | 8784687  | 2.50E-05 | 0.17448 | 192 | 0.109911802 | 0.036601778 |
| SNP_A.K_709376_4_8259816    | 4  | 8259816  | 2.50E-05 | 0.07813 | 192 | 0.10990721  | 0.036601778 |
| SNP_A.K_709381_4_8263095    | 4  | 8263095  | 2.51E-05 | 0.07813 | 192 | 0.109881147 | 0.036662625 |
| SNP_A.K_708719_4_8089008    | 4  | 8089008  | 2.52E-05 | 0.1224  | 192 | 0.10984436  | 0.036742047 |
| SNP_A.K_708610_4_8064025    | 4  | 8064025  | 2.52E-05 | 0.07552 | 192 | 0.109841812 | 0.036742047 |
| SNP_A.K_709088_4_8221435    | 4  | 8221435  | 2.52E-05 | 0.07552 | 192 | 0.109828294 | 0.03676135  |
| SNP_A.K_708942_4_8150941    | 4  | 8150941  | 2.55E-05 | 0.21354 | 192 | 0.109722586 | 0.037089454 |
| SNP_A.K_1028147_6_10567378  | 6  | 10567378 | 2.55E-05 | 0.03906 | 192 | 0.109708174 | 0.03711199  |
| SNP_A.K_730525_4_12698095   | 4  | 12698095 | 2.56E-05 | 0.22917 | 192 | 0.109678878 | 0.03718472  |
| SNP_A.K_709387_4_8263723    | 4  | 8263723  | 2.56E-05 | 0.07292 | 192 | 0.109654611 | 0.037240623 |
| SNP_A.K_685893_4_2518826    | 4  | 2518826  | 2.59E-05 | 0.05469 | 192 | 0.109529548 | 0.037573968 |
| SNP_A.K_1815435_11_8851897  | 11 | 8851897  | 2.59E-05 | 0.14583 | 192 | 0.109522105 | 0.037573968 |
| SNP_A.K_708659_4_8071880    | 4  | 8071880  | 2.60E-05 | 0.07292 | 192 | 0.109498138 | 0.037573968 |
| SNP_A.K_709040_4_8214465    | 4  | 8214465  | 2.60E-05 | 0.07292 | 192 | 0.109498138 | 0.037573968 |
| SNP_A.K_709743_4_8284612    | 4  | 8284612  | 2.60E-05 | 0.07292 | 192 | 0.109498138 | 0.037573968 |
| SNP_A.K_709744_4_8284627    | 4  | 8284627  | 2.60E-05 | 0.07292 | 192 | 0.109498138 | 0.037573968 |
| SNP_A.K_709745_4_8284636    | 4  | 8284636  | 2.60E-05 | 0.07292 | 192 | 0.109498138 | 0.037573968 |
| SNP_A.K_1552032_9_9140140   | 9  | 9140140  | 2.60E-05 | 0.32813 | 192 | 0.109494948 | 0.037573968 |
| SNP_A.K_842261_5_810097     | 5  | 810097   | 2.61E-05 | 0.11198 | 192 | 0.109457746 | 0.037674824 |
| SNP_A.K_1814317_11_8613137  | 11 | 8613137  | 2.61E-05 | 0.17708 | 192 | 0.109440674 | 0.037707054 |
| SNP_A.K_709818_4_8298376    | 4  | 8298376  | 2.62E-05 | 0.07292 | 192 | 0.109427465 | 0.037726104 |
| SNP_A.K_1812054_11_8373713  | 11 | 8373713  | 2.62E-05 | 0.17708 | 192 | 0.109389047 | 0.037818687 |
| SNP_A.K_725288_4_11781692   | 4  | 11781692 | 2.63E-05 | 0.21875 | 192 | 0.109384311 | 0.037818687 |
| SNP_A.K_1812393_11_8414058  | 11 | 8414058  | 2.63E-05 | 0.1901  | 192 | 0.109377558 | 0.037818687 |
| SNP_A.K_1175357_7_1866178   | 7  | 1866178  | 2.64E-05 | 0.1224  | 192 | 0.109311206 | 0.037994507 |

|                            |    |          |          |         |     |             |             |
|----------------------------|----|----------|----------|---------|-----|-------------|-------------|
| SNP_A.K_1175358_7_1866184  | 7  | 1866184  | 2.64E-05 | 0.1224  | 192 | 0.109311206 | 0.037994507 |
| SNP_A.K_710517_4_8425693   | 4  | 8425693  | 2.65E-05 | 0.11719 | 192 | 0.109271516 | 0.038105274 |
| SNP_A.K_374318_2_17805532  | 2  | 17805532 | 2.66E-05 | 0.06771 | 192 | 0.109257919 | 0.038105985 |
| SNP_A.K_709343_4_8250121   | 4  | 8250121  | 2.66E-05 | 0.21875 | 192 | 0.10925611  | 0.038105985 |
| SNP_A.K_1552126_9_9149371  | 9  | 9149371  | 2.66E-05 | 0.29948 | 192 | 0.109239134 | 0.038138449 |
| SNP_A.K_708920_4_8125431   | 4  | 8125431  | 2.67E-05 | 0.07292 | 192 | 0.109209949 | 0.038172025 |
| SNP_A.K_708919_4_8125425   | 4  | 8125425  | 2.67E-05 | 0.07292 | 192 | 0.109209949 | 0.038172025 |
| SNP_A.K_1552101_9_9147266  | 9  | 9147266  | 2.67E-05 | 0.17969 | 192 | 0.109199431 | 0.038172025 |
| SNP_A.K_1813888_11_8585907 | 11 | 8585907  | 2.67E-05 | 0.18229 | 192 | 0.109199122 | 0.038172025 |
| SNP_A.K_1552906_9_9224418  | 9  | 9224418  | 2.67E-05 | 0.25521 | 192 | 0.109182171 | 0.038204555 |
| SNP_A.K_708985_4_8212224   | 4  | 8212224  | 2.68E-05 | 0.07292 | 192 | 0.109151154 | 0.038233831 |
| SNP_A.K_708614_4_8064118   | 4  | 8064118  | 2.69E-05 | 0.07292 | 192 | 0.10910844  | 0.038233831 |
| SNP_A.K_1814016_11_8595437 | 11 | 8595437  | 2.69E-05 | 0.17188 | 192 | 0.10910228  | 0.038233831 |
| SNP_A.K_962070_5_28029286  | 5  | 28029286 | 2.70E-05 | 0.14323 | 192 | 0.1090927   | 0.038233831 |
| SNP_A.K_1813954_11_8590096 | 11 | 8590096  | 2.70E-05 | 0.17708 | 192 | 0.109083509 | 0.038233831 |
| SNP_A.K_725299_4_11790658  | 4  | 11790658 | 2.70E-05 | 0.21615 | 192 | 0.109073446 | 0.038233831 |
| SNP_A.K_1814735_11_8771913 | 11 | 8771913  | 2.70E-05 | 0.17188 | 192 | 0.109064506 | 0.038233831 |
| SNP_A.K_1814842_11_8782027 | 11 | 8782027  | 2.70E-05 | 0.17188 | 192 | 0.109058324 | 0.038233831 |
| SNP_A.K_1814844_11_8782049 | 11 | 8782049  | 2.70E-05 | 0.17188 | 192 | 0.109058324 | 0.038233831 |
| SNP_A.K_1814905_11_8784922 | 11 | 8784922  | 2.70E-05 | 0.17188 | 192 | 0.109058324 | 0.038233831 |
| SNP_A.K_1814682_11_8768983 | 11 | 8768983  | 2.71E-05 | 0.17708 | 192 | 0.109021921 | 0.038233831 |
| SNP_A.K_725335_4_11794567  | 4  | 11794567 | 2.71E-05 | 0.21615 | 192 | 0.109015621 | 0.038233831 |
| SNP_A.K_1551924_9_9132727  | 9  | 9132727  | 2.72E-05 | 0.33854 | 192 | 0.109011813 | 0.038233831 |
| SNP_A.K_708986_4_8212252   | 4  | 8212252  | 2.72E-05 | 0.07292 | 192 | 0.109010349 | 0.038233831 |
| SNP_A.K_709146_4_8234031   | 4  | 8234031  | 2.72E-05 | 0.07292 | 192 | 0.109010349 | 0.038233831 |
| SNP_A.K_709621_4_8278416   | 4  | 8278416  | 2.72E-05 | 0.07292 | 192 | 0.109010349 | 0.038233831 |
| SNP_A.K_709670_4_8280243   | 4  | 8280243  | 2.72E-05 | 0.07292 | 192 | 0.109010349 | 0.038233831 |
| SNP_A.K_709147_4_8234036   | 4  | 8234036  | 2.72E-05 | 0.07292 | 192 | 0.109010349 | 0.038233831 |
| SNP_A.K_709151_4_8234170   | 4  | 8234170  | 2.72E-05 | 0.07292 | 192 | 0.109010349 | 0.038233831 |
| SNP_A.K_709747_4_8284684   | 4  | 8284684  | 2.72E-05 | 0.07292 | 192 | 0.109010349 | 0.038233831 |
| SNP_A.K_1813428_11_8538044 | 11 | 8538044  | 2.72E-05 | 0.17708 | 192 | 0.109006597 | 0.038233831 |
| SNP_A.K_363021_2_16391839  | 2  | 16391839 | 2.72E-05 | 0.11198 | 192 | 0.109003826 | 0.038233831 |
| SNP_A.K_709684_4_8281014   | 4  | 8281014  | 2.72E-05 | 0.07292 | 192 | 0.108999341 | 0.038233831 |
| SNP_A.K_1813835_11_8582501 | 11 | 8582501  | 2.72E-05 | 0.17188 | 192 | 0.108993729 | 0.038233831 |
| SNP_A.K_725356_4_11797372  | 4  | 11797372 | 2.73E-05 | 0.11198 | 192 | 0.108972952 | 0.038280166 |
| SNP_A.K_708988_4_8212323   | 4  | 8212323  | 2.73E-05 | 0.07292 | 192 | 0.108953781 | 0.038295164 |
| SNP_A.K_709211_4_8239305   | 4  | 8239305  | 2.73E-05 | 0.07292 | 192 | 0.108953781 | 0.038295164 |
| SNP_A.K_708609_4_8063995   | 4  | 8063995  | 2.73E-05 | 0.07292 | 192 | 0.108934574 | 0.038336166 |
| SNP_A.K_708585_4_8062823   | 4  | 8062823  | 2.74E-05 | 0.07813 | 192 | 0.108919493 | 0.038348138 |
| SNP_A.K_253393_1_40887243  | 1  | 40887243 | 2.74E-05 | 0.1224  | 192 | 0.108916309 | 0.038348138 |
| SNP_A.K_687588_4_3566285   | 4  | 3566285  | 2.76E-05 | 0.15104 | 192 | 0.108845865 | 0.038542509 |
| SNP_A.K_1310467_7_26336854 | 7  | 26336854 | 2.76E-05 | 0.13542 | 192 | 0.10884582  | 0.038542509 |
| SNP_A.K_709354_4_8258458   | 4  | 8258458  | 2.77E-05 | 0.07292 | 192 | 0.108783365 | 0.038735683 |
| SNP_A.K_708997_4_8212485   | 4  | 8212485  | 2.79E-05 | 0.07031 | 192 | 0.108733062 | 0.038886928 |
| SNP_A.K_1813110_11_8515527 | 11 | 8515527  | 2.79E-05 | 0.17708 | 192 | 0.108724538 | 0.038890957 |
| SNP_A.K_708901_4_8122854   | 4  | 8122854  | 2.79E-05 | 0.07292 | 192 | 0.108715235 | 0.038897756 |
| SNP_A.K_1815430_11_8851744 | 11 | 8851744  | 2.80E-05 | 0.15885 | 192 | 0.10869366  | 0.038947958 |
| SNP_A.K_708831_4_8115405   | 4  | 8115405  | 2.80E-05 | 0.07813 | 192 | 0.10865817  | 0.039047555 |
| SNP_A.K_709019_4_8213062   | 4  | 8213062  | 2.81E-05 | 0.07031 | 192 | 0.108641981 | 0.039055514 |
| SNP_A.K_1552854_9_9222428  | 9  | 9222428  | 2.81E-05 | 0.21875 | 192 | 0.108641206 | 0.039055514 |

|                             |    |          |          |         |     |             |             |
|-----------------------------|----|----------|----------|---------|-----|-------------|-------------|
| SNP_A.K_708615_4_8064167    | 4  | 8064167  | 2.82E-05 | 0.07292 | 192 | 0.108613967 | 0.039126116 |
| SNP_A.K_708622_4_8065092    | 4  | 8065092  | 2.82E-05 | 0.07031 | 192 | 0.108594153 | 0.039170443 |
| SNP_A.K_709650_4_8279251    | 4  | 8279251  | 2.82E-05 | 0.07813 | 192 | 0.108578649 | 0.039179011 |
| SNP_A.K_1814250_11_8610181  | 11 | 8610181  | 2.83E-05 | 0.17708 | 192 | 0.108577066 | 0.039179011 |
| SNP_A.K_443758_2_29266078   | 2  | 29266078 | 2.83E-05 | 0.3125  | 192 | 0.108553182 | 0.039237955 |
| SNP_A.K_1812474_11_8441962  | 11 | 8441962  | 2.85E-05 | 0.17448 | 192 | 0.108475423 | 0.039489799 |
| SNP_A.K_709362_4_8258837    | 4  | 8258837  | 2.87E-05 | 0.07813 | 192 | 0.108420056 | 0.039662537 |
| SNP_A.K_709617_4_8278341    | 4  | 8278341  | 2.89E-05 | 0.07552 | 192 | 0.108324262 | 0.03996907  |
| SNP_A.K_723287_4_11429138   | 4  | 11429138 | 2.89E-05 | 0.20313 | 192 | 0.108320692 | 0.03996907  |
| SNP_A.K_1777314_11_2486044  | 11 | 2486044  | 2.92E-05 | 0.17448 | 192 | 0.108231324 | 0.040268223 |
| SNP_A.K_1552851_9_9222334   | 9  | 9222334  | 2.92E-05 | 0.26563 | 192 | 0.108218253 | 0.040289349 |
| SNP_A.K_1813800_11_8579307  | 11 | 8579307  | 2.93E-05 | 0.17448 | 192 | 0.108192087 | 0.040358503 |
| SNP_A.K_708552_4_8061203    | 4  | 8061203  | 2.94E-05 | 0.07813 | 192 | 0.108155191 | 0.040467237 |
| SNP_A.K_1815421_11_8851526  | 11 | 8851526  | 2.94E-05 | 0.15885 | 192 | 0.10812427  | 0.040554262 |
| SNP_A.K_1814756_11_8772488  | 11 | 8772488  | 2.95E-05 | 0.17969 | 192 | 0.108096588 | 0.04061577  |
| SNP_A.K_1814707_11_8770764  | 11 | 8770764  | 2.95E-05 | 0.17969 | 192 | 0.108093042 | 0.04061577  |
| SNP_A.K_1813842_11_8583219  | 11 | 8583219  | 2.96E-05 | 0.17448 | 192 | 0.108074394 | 0.040640484 |
| SNP_A.K_708760_4_8111267    | 4  | 8111267  | 2.96E-05 | 0.07813 | 192 | 0.108069264 | 0.040640484 |
| SNP_A.K_708998_4_8212500    | 4  | 8212500  | 2.96E-05 | 0.07292 | 192 | 0.108064555 | 0.040640484 |
| SNP_A.K_1814734_11_8771851  | 11 | 8771851  | 2.96E-05 | 0.17448 | 192 | 0.108045645 | 0.040659983 |
| SNP_A.K_708855_4_8117540    | 4  | 8117540  | 2.97E-05 | 0.07813 | 192 | 0.108039614 | 0.040659983 |
| SNP_A.K_1814647_11_8767206  | 11 | 8767206  | 2.97E-05 | 0.17969 | 192 | 0.108037528 | 0.040659983 |
| SNP_A.K_1814649_11_8767299  | 11 | 8767299  | 2.97E-05 | 0.17969 | 192 | 0.108014168 | 0.040694567 |
| SNP_A.K_708726_4_8089178    | 4  | 8089178  | 2.97E-05 | 0.07813 | 192 | 0.108010027 | 0.040694567 |
| SNP_A.K_1813951_11_8589683  | 11 | 8589683  | 2.98E-05 | 0.17969 | 192 | 0.108006469 | 0.040694567 |
| SNP_A.K_1812397_11_8414220  | 11 | 8414220  | 2.99E-05 | 0.1849  | 192 | 0.107971221 | 0.040798363 |
| SNP_A.K_711566_4_8637122    | 4  | 8637122  | 2.99E-05 | 0.20573 | 192 | 0.107942549 | 0.040856559 |
| SNP_A.K_1813441_11_8538578  | 11 | 8538578  | 2.99E-05 | 0.17969 | 192 | 0.107937018 | 0.040856559 |
| SNP_A.K_253039_1_40848183   | 1  | 40848183 | 3.00E-05 | 0.2526  | 192 | 0.107928449 | 0.040856559 |
| SNP_A.K_708865_4_8119500    | 4  | 8119500  | 3.00E-05 | 0.07813 | 192 | 0.107911664 | 0.040856559 |
| SNP_A.K_1814887_11_8784151  | 11 | 8784151  | 3.01E-05 | 0.17448 | 192 | 0.10789386  | 0.040856559 |
| SNP_A.K_1814888_11_8784160  | 11 | 8784160  | 3.01E-05 | 0.17448 | 192 | 0.10789386  | 0.040856559 |
| SNP_A.K_1814861_11_8783356  | 11 | 8783356  | 3.01E-05 | 0.17448 | 192 | 0.10789386  | 0.040856559 |
| SNP_A.K_970962_6_162154     | 6  | 162154   | 3.01E-05 | 0.27083 | 192 | 0.107891542 | 0.040856559 |
| SNP_A.K_709715_4_8283044    | 4  | 8283044  | 3.01E-05 | 0.07552 | 192 | 0.107884927 | 0.040856559 |
| SNP_A.K_1814849_11_8782798  | 11 | 8782798  | 3.01E-05 | 0.17448 | 192 | 0.107883552 | 0.040856559 |
| SNP_A.K_1814837_11_8780957  | 11 | 8780957  | 3.01E-05 | 0.17448 | 192 | 0.107868577 | 0.040885553 |
| SNP_A.K_739791_4_15302574   | 4  | 15302574 | 3.02E-05 | 0.04948 | 192 | 0.107835808 | 0.040980834 |
| SNP_A.K_724245_4_11583196   | 4  | 11583196 | 3.03E-05 | 0.26042 | 192 | 0.107823036 | 0.041001739 |
| SNP_A.K_1552855_9_9222436   | 9  | 9222436  | 3.03E-05 | 0.21354 | 192 | 0.107798918 | 0.041013253 |
| SNP_A.K_1362713_8_5699051   | 8  | 5699051  | 3.04E-05 | 0.30208 | 192 | 0.107787264 | 0.041013253 |
| SNP_A.K_1814045_11_8597154  | 11 | 8597154  | 3.04E-05 | 0.17708 | 192 | 0.107780316 | 0.041013253 |
| SNP_A.K_708660_4_8071891    | 4  | 8071891  | 3.04E-05 | 0.07552 | 192 | 0.107776355 | 0.041013253 |
| SNP_A.K_613492_3_26711110   | 3  | 26711110 | 3.04E-05 | 0.16406 | 192 | 0.107774998 | 0.041013253 |
| SNP_A.K_1744711_10_18881890 | 10 | 18881890 | 3.04E-05 | 0.08594 | 192 | 0.107770086 | 0.041013253 |
| SNP_A.K_1551761_9_9124839   | 9  | 9124839  | 3.04E-05 | 0.32813 | 192 | 0.107769942 | 0.041013253 |
| SNP_A.K_709252_4_8242969    | 4  | 8242969  | 3.05E-05 | 0.22135 | 192 | 0.107750714 | 0.041028641 |
| SNP_A.K_119163_1_17040583   | 1  | 17040583 | 3.05E-05 | 0.02344 | 192 | 0.107750045 | 0.041028641 |
| SNP_A.K_1814885_11_8784112  | 11 | 8784112  | 3.05E-05 | 0.17448 | 192 | 0.107744455 | 0.041028641 |
| SNP_A.K_709089_4_8221477    | 4  | 8221477  | 3.06E-05 | 0.07552 | 192 | 0.107706222 | 0.041143405 |

|                            |    |          |          |         |     |             |             |
|----------------------------|----|----------|----------|---------|-----|-------------|-------------|
| SNP_A.K_1552967_9_9227581  | 9  | 9227581  | 3.06E-05 | 0.23698 | 192 | 0.107699522 | 0.041143405 |
| SNP_A.K_1813185_11_8521615 | 11 | 8521615  | 3.07E-05 | 0.17969 | 192 | 0.107673766 | 0.041213262 |
| SNP_A.K_288389_2_5019477   | 2  | 5019477  | 3.07E-05 | 0.01823 | 192 | 0.107654099 | 0.041260403 |
| SNP_A.K_364196_2_16502679  | 2  | 16502679 | 3.08E-05 | 0.02083 | 192 | 0.107639342 | 0.041289178 |
| SNP_A.K_253121_1_40862453  | 1  | 40862453 | 3.10E-05 | 0.32031 | 192 | 0.107549205 | 0.041602244 |
| SNP_A.K_1550883_9_9016610  | 9  | 9016610  | 3.10E-05 | 0.1224  | 192 | 0.107541525 | 0.041604506 |
| SNP_A.K_740602_4_15920108  | 4  | 15920108 | 3.13E-05 | 0.03385 | 192 | 0.107457175 | 0.041871657 |
| SNP_A.K_708675_4_8084755   | 4  | 8084755  | 3.13E-05 | 0.07813 | 192 | 0.107457012 | 0.041871657 |
| SNP_A.K_709526_4_8271597   | 4  | 8271597  | 3.13E-05 | 0.20573 | 192 | 0.10743769  | 0.041918363 |
| SNP_A.K_1552778_9_9217929  | 9  | 9217929  | 3.15E-05 | 0.13021 | 192 | 0.107390911 | 0.042043096 |
| SNP_A.K_1552552_9_9194726  | 9  | 9194726  | 3.15E-05 | 0.13021 | 192 | 0.107390911 | 0.042043096 |
| SNP_A.K_708678_4_8084838   | 4  | 8084838  | 3.15E-05 | 0.07813 | 192 | 0.107382607 | 0.042047882 |
| SNP_A.K_708649_4_8070826   | 4  | 8070826  | 3.16E-05 | 0.07813 | 192 | 0.107345125 | 0.042164471 |
| SNP_A.K_709223_4_8241661   | 4  | 8241661  | 3.17E-05 | 0.07552 | 192 | 0.107302263 | 0.042283779 |
| SNP_A.K_725936_4_11886583  | 4  | 11886583 | 3.17E-05 | 0.13021 | 192 | 0.107299988 | 0.042283779 |
| SNP_A.K_726982_4_12065488  | 4  | 12065488 | 3.18E-05 | 0.06771 | 192 | 0.107287731 | 0.042303882 |
| SNP_A.K_288698_2_5058182   | 2  | 5058182  | 3.19E-05 | 0.01823 | 192 | 0.107236045 | 0.042451872 |
| SNP_A.K_710107_4_8316101   | 4  | 8316101  | 3.19E-05 | 0.19792 | 192 | 0.107235299 | 0.042451872 |
| SNP_A.K_1812587_11_8453121 | 11 | 8453121  | 3.20E-05 | 0.17708 | 192 | 0.10722066  | 0.04248132  |
| SNP_A.K_1813967_11_8591339 | 11 | 8591339  | 3.22E-05 | 0.17708 | 192 | 0.107124003 | 0.042816419 |
| SNP_A.K_724390_4_11592274  | 4  | 11592274 | 3.23E-05 | 0.26042 | 192 | 0.107120297 | 0.042816419 |
| SNP_A.K_693670_4_5046897   | 4  | 5046897  | 3.23E-05 | 0.13281 | 192 | 0.107108117 | 0.042836592 |
| SNP_A.K_1815414_11_8851157 | 11 | 8851157  | 3.23E-05 | 0.11979 | 192 | 0.107098686 | 0.042846068 |
| SNP_A.K_642926_3_30888585  | 3  | 30888585 | 3.24E-05 | 0.30208 | 192 | 0.107081456 | 0.042885997 |
| SNP_A.K_1814901_11_8784709 | 11 | 8784709  | 3.24E-05 | 0.1875  | 192 | 0.107070221 | 0.042902563 |
| SNP_A.K_1814668_11_8768087 | 11 | 8768087  | 3.25E-05 | 0.18229 | 192 | 0.107051303 | 0.042949178 |
| SNP_A.K_708617_4_8064290   | 4  | 8064290  | 3.25E-05 | 0.07552 | 192 | 0.107041915 | 0.042958584 |
| SNP_A.K_1951052_12_2939047 | 12 | 2939047  | 3.26E-05 | 0.03125 | 192 | 0.107011834 | 0.04302798  |
| SNP_A.K_709654_4_8279460   | 4  | 8279460  | 3.26E-05 | 0.07552 | 192 | 0.10698808  | 0.04302798  |
| SNP_A.K_374577_2_17851726  | 2  | 17851726 | 3.27E-05 | 0.08854 | 192 | 0.106983479 | 0.04302798  |
| SNP_A.K_374578_2_17851732  | 2  | 17851732 | 3.27E-05 | 0.08854 | 192 | 0.106983479 | 0.04302798  |
| SNP_A.K_1812994_11_8485770 | 11 | 8485770  | 3.27E-05 | 0.17708 | 192 | 0.106983333 | 0.04302798  |
| SNP_A.K_710173_4_8319366   | 4  | 8319366  | 3.27E-05 | 0.09115 | 192 | 0.106982274 | 0.04302798  |
| SNP_A.K_724784_4_11680029  | 4  | 11680029 | 3.27E-05 | 0.21615 | 192 | 0.106975434 | 0.04302798  |
| SNP_A.K_709896_4_8300648   | 4  | 8300648  | 3.27E-05 | 0.0651  | 192 | 0.106961804 | 0.043054166 |
| SNP_A.K_1813685_11_8566031 | 11 | 8566031  | 3.28E-05 | 0.1849  | 192 | 0.106949017 | 0.043055277 |
| SNP_A.K_729033_4_12440522  | 4  | 12440522 | 3.28E-05 | 0.27083 | 192 | 0.106941666 | 0.043055277 |
| SNP_A.K_1813722_11_8570967 | 11 | 8570967  | 3.28E-05 | 0.18229 | 192 | 0.106933965 | 0.043055277 |
| SNP_A.K_1814637_11_8766551 | 11 | 8766551  | 3.28E-05 | 0.17708 | 192 | 0.106931321 | 0.043055277 |
| SNP_A.K_1813449_11_8538938 | 11 | 8538938  | 3.28E-05 | 0.17708 | 192 | 0.106920201 | 0.043055277 |
| SNP_A.K_709022_4_8213401   | 4  | 8213401  | 3.29E-05 | 0.07813 | 192 | 0.106910884 | 0.043055277 |
| SNP_A.K_1814656_11_8767580 | 11 | 8767580  | 3.29E-05 | 0.17708 | 192 | 0.106909716 | 0.043055277 |
| SNP_A.K_1953593_12_3604966 | 12 | 3604966  | 3.29E-05 | 0.10938 | 192 | 0.106906112 | 0.043055277 |
| SNP_A.K_1813164_11_8520536 | 11 | 8520536  | 3.31E-05 | 0.18229 | 192 | 0.10683071  | 0.043308707 |
| SNP_A.K_374431_2_17835716  | 2  | 17835716 | 3.31E-05 | 0.07813 | 192 | 0.106827843 | 0.043308707 |
| SNP_A.K_709563_4_8273832   | 4  | 8273832  | 3.32E-05 | 0.36458 | 192 | 0.106817366 | 0.043322824 |
| SNP_A.K_1814883_11_8784097 | 11 | 8784097  | 3.33E-05 | 0.17708 | 192 | 0.106777496 | 0.043442329 |
| SNP_A.K_724815_4_11684980  | 4  | 11684980 | 3.33E-05 | 0.1224  | 192 | 0.106773333 | 0.043442329 |
| SNP_A.K_708898_4_8122627   | 4  | 8122627  | 3.33E-05 | 0.07813 | 192 | 0.106755107 | 0.04348722  |
| SNP_A.K_706801_4_6936589   | 4  | 6936589  | 3.34E-05 | 0.21875 | 192 | 0.106730374 | 0.043507508 |

|                            |    |          |          |         |     |             |             |
|----------------------------|----|----------|----------|---------|-----|-------------|-------------|
| SNP_A.K_709117_4_8228308   | 4  | 8228308  | 3.34E-05 | 0.08073 | 192 | 0.106729148 | 0.043507508 |
| SNP_A.K_687549_4_3564120   | 4  | 3564120  | 3.34E-05 | 0.15104 | 192 | 0.106723277 | 0.043507508 |
| SNP_A.K_624595_3_27970881  | 3  | 27970881 | 3.34E-05 | 0.29167 | 192 | 0.106722496 | 0.043507508 |
| SNP_A.K_687546_4_3563933   | 4  | 3563933  | 3.36E-05 | 0.14844 | 192 | 0.106673146 | 0.043664621 |
| SNP_A.K_726200_4_11928202  | 4  | 11928202 | 3.36E-05 | 0.26042 | 192 | 0.106669195 | 0.043664621 |
| SNP_A.K_725962_4_11889084  | 4  | 11889084 | 3.38E-05 | 0.17188 | 192 | 0.106598611 | 0.043918799 |
| SNP_A.K_624209_3_27934904  | 3  | 27934904 | 3.38E-05 | 0.21615 | 192 | 0.106590744 | 0.043922879 |
| SNP_A.K_613868_3_26743395  | 3  | 26743395 | 3.40E-05 | 0.16667 | 192 | 0.106550683 | 0.044036943 |
| SNP_A.K_708925_4_8125940   | 4  | 8125940  | 3.40E-05 | 0.07292 | 192 | 0.106548588 | 0.044036943 |
| SNP_A.K_709608_4_8277958   | 4  | 8277958  | 3.40E-05 | 0.07813 | 192 | 0.106529735 | 0.044066146 |
| SNP_A.K_709355_4_8258567   | 4  | 8258567  | 3.40E-05 | 0.07813 | 192 | 0.106527646 | 0.044066146 |
| SNP_A.K_710051_4_8312772   | 4  | 8312772  | 3.41E-05 | 0.05729 | 192 | 0.106505101 | 0.044129291 |
| SNP_A.K_1362119_8_5625112  | 8  | 5625112  | 3.42E-05 | 0.25781 | 192 | 0.106466266 | 0.044258171 |
| SNP_A.K_815664_4_31300328  | 4  | 31300328 | 3.43E-05 | 0.09896 | 192 | 0.106439545 | 0.044338496 |
| SNP_A.K_709182_4_8237215   | 4  | 8237215  | 3.45E-05 | 0.07552 | 192 | 0.106386212 | 0.044526806 |
| SNP_A.K_1777289_11_2484957 | 11 | 2484957  | 3.48E-05 | 0.21094 | 192 | 0.106284306 | 0.044914289 |
| SNP_A.K_723920_4_11545967  | 4  | 11545967 | 3.48E-05 | 0.21875 | 192 | 0.106272541 | 0.044934608 |
| SNP_A.K_708631_4_8068448   | 4  | 8068448  | 3.49E-05 | 0.07552 | 192 | 0.106252414 | 0.044980286 |
| SNP_A.K_709614_4_8278208   | 4  | 8278208  | 3.49E-05 | 0.07552 | 192 | 0.106242636 | 0.044980286 |
| SNP_A.K_709641_4_8278999   | 4  | 8278999  | 3.50E-05 | 0.07292 | 192 | 0.106236979 | 0.044980286 |
| SNP_A.K_253178_1_40872462  | 1  | 40872462 | 3.50E-05 | 0.4401  | 192 | 0.106228169 | 0.044980286 |
| SNP_A.K_651397_3_32507406  | 3  | 32507406 | 3.50E-05 | 0.19792 | 192 | 0.106227446 | 0.044980286 |
| SNP_A.K_708239_4_7871281   | 4  | 7871281  | 3.51E-05 | 0.24479 | 192 | 0.106204458 | 0.045021498 |
| SNP_A.K_710184_4_8320602   | 4  | 8320602  | 3.51E-05 | 0.09896 | 192 | 0.106200436 | 0.045021498 |
| SNP_A.K_1813021_11_8487443 | 11 | 8487443  | 3.51E-05 | 0.15885 | 192 | 0.106196818 | 0.045021498 |
| SNP_A.K_1813889_11_8585929 | 11 | 8585929  | 3.51E-05 | 0.1849  | 192 | 0.106190317 | 0.045021498 |
| SNP_A.K_1028784_6_10683469 | 6  | 10683469 | 3.52E-05 | 0.03906 | 192 | 0.106161432 | 0.045075891 |
| SNP_A.K_709475_4_8268650   | 4  | 8268650  | 3.52E-05 | 0.08333 | 192 | 0.106150989 | 0.045075891 |
| SNP_A.K_685847_4_2517527   | 4  | 2517527  | 3.52E-05 | 0.05729 | 192 | 0.10614924  | 0.045075891 |
| SNP_A.K_709360_4_8258818   | 4  | 8258818  | 3.52E-05 | 0.07552 | 192 | 0.106145244 | 0.045075891 |
| SNP_A.K_1777351_11_2490187 | 11 | 2490187  | 3.53E-05 | 0.17969 | 192 | 0.106126685 | 0.045075891 |
| SNP_A.K_709620_4_8278402   | 4  | 8278402  | 3.53E-05 | 0.07552 | 192 | 0.106125535 | 0.045075891 |
| SNP_A.K_722570_4_11224191  | 4  | 11224191 | 3.53E-05 | 0.21875 | 192 | 0.106119724 | 0.045075891 |
| SNP_A.K_724599_4_11643380  | 4  | 11643380 | 3.54E-05 | 0.16146 | 192 | 0.10611281  | 0.045075891 |
| SNP_A.K_1812107_11_8379190 | 11 | 8379190  | 3.54E-05 | 0.19792 | 192 | 0.106105598 | 0.045075891 |
| SNP_A.K_709697_4_8282154   | 4  | 8282154  | 3.54E-05 | 0.08333 | 192 | 0.106104297 | 0.045075891 |
| SNP_A.K_709013_4_8212782   | 4  | 8212782  | 3.54E-05 | 0.07552 | 192 | 0.106102951 | 0.045075891 |
| SNP_A.K_1551802_9_9126780  | 9  | 9126780  | 3.55E-05 | 0.29688 | 192 | 0.106069103 | 0.045178329 |
| SNP_A.K_725233_4_11764122  | 4  | 11764122 | 3.55E-05 | 0.1224  | 192 | 0.106064624 | 0.045178329 |
| SNP_A.K_1777330_11_2487773 | 11 | 2487773  | 3.55E-05 | 0.17969 | 192 | 0.106056337 | 0.045184847 |
| SNP_A.K_708592_4_8063241   | 4  | 8063241  | 3.56E-05 | 0.09115 | 192 | 0.106028179 | 0.045271459 |
| SNP_A.K_708995_4_8212398   | 4  | 8212398  | 3.56E-05 | 0.07813 | 192 | 0.106021932 | 0.045271459 |
| SNP_A.K_709612_4_8278177   | 4  | 8278177  | 3.57E-05 | 0.07552 | 192 | 0.10601353  | 0.045278517 |
| SNP_A.K_1814651_11_8767369 | 11 | 8767369  | 3.57E-05 | 0.17969 | 192 | 0.105999363 | 0.045309399 |
| SNP_A.K_709742_4_8284588   | 4  | 8284588  | 3.57E-05 | 0.07813 | 192 | 0.105992147 | 0.0453116   |
| SNP_A.K_716913_4_9934647   | 4  | 9934647  | 3.58E-05 | 0.15885 | 192 | 0.105972051 | 0.045367054 |
| SNP_A.K_693667_4_5046796   | 4  | 5046796  | 3.58E-05 | 0.14063 | 192 | 0.105964527 | 0.045370565 |
| SNP_A.K_1814889_11_8784206 | 11 | 8784206  | 3.59E-05 | 0.17969 | 192 | 0.10594894  | 0.045407457 |
| SNP_A.K_1813998_11_8594911 | 11 | 8594911  | 3.59E-05 | 0.17448 | 192 | 0.10594118  | 0.045411983 |
| SNP_A.K_708903_4_8123035   | 4  | 8123035  | 3.60E-05 | 0.07813 | 192 | 0.105921631 | 0.045465365 |

|                             |    |          |          |         |     |             |             |
|-----------------------------|----|----------|----------|---------|-----|-------------|-------------|
| SNP_A.K_1812936_11_8481733  | 11 | 8481733  | 3.60E-05 | 0.1849  | 192 | 0.105902564 | 0.045516828 |
| SNP_A.K_709033_4_8214040    | 4  | 8214040  | 3.61E-05 | 0.07552 | 192 | 0.105887538 | 0.045551583 |
| SNP_A.K_1027593_6_10431515  | 6  | 10431515 | 3.62E-05 | 0.08594 | 192 | 0.105867129 | 0.045587609 |
| SNP_A.K_1362543_8_5674448   | 8  | 5674448  | 3.62E-05 | 0.25    | 192 | 0.105859992 | 0.045587609 |
| SNP_A.K_1814573_11_8762758  | 11 | 8762758  | 3.62E-05 | 0.14844 | 192 | 0.105845034 | 0.045587609 |
| SNP_A.K_418327_2_24389648   | 2  | 24389648 | 3.62E-05 | 0.13542 | 192 | 0.105844467 | 0.045587609 |
| SNP_A.K_623709_3_27872385   | 3  | 27872385 | 3.62E-05 | 0.20052 | 192 | 0.105843729 | 0.045587609 |
| SNP_A.K_654685_3_33856238   | 3  | 33856238 | 3.63E-05 | 0.28125 | 192 | 0.105837793 | 0.045587609 |
| SNP_A.K_1814221_11_8608175  | 11 | 8608175  | 3.63E-05 | 0.22656 | 192 | 0.105832404 | 0.045587609 |
| SNP_A.K_708683_4_8085306    | 4  | 8085306  | 3.63E-05 | 0.07552 | 192 | 0.105813353 | 0.045638819 |
| SNP_A.K_1488056_8_26996305  | 8  | 26996305 | 3.64E-05 | 0.0625  | 192 | 0.105806853 | 0.045638819 |
| SNP_A.K_708709_4_8088140    | 4  | 8088140  | 3.64E-05 | 0.08073 | 192 | 0.105779703 | 0.045724362 |
| SNP_A.K_1274046_7_20012345  | 7  | 20012345 | 3.65E-05 | 0.07031 | 192 | 0.105767505 | 0.045747673 |
| SNP_A.K_709394_4_8264814    | 4  | 8264814  | 3.65E-05 | 0.07813 | 192 | 0.105757901 | 0.045760186 |
| SNP_A.K_727030_4_12070996   | 4  | 12070996 | 3.66E-05 | 0.22135 | 192 | 0.105747197 | 0.045777312 |
| SNP_A.K_723644_4_11485007   | 4  | 11485007 | 3.67E-05 | 0.21354 | 192 | 0.105695163 | 0.04596738  |
| SNP_A.K_1814335_11_8613970  | 11 | 8613970  | 3.68E-05 | 0.14323 | 192 | 0.105680708 | 0.045981895 |
| SNP_A.K_1813738_11_8574897  | 11 | 8574897  | 3.68E-05 | 0.1849  | 192 | 0.105678521 | 0.045981895 |
| SNP_A.K_730498_4_12696618   | 4  | 12696618 | 3.68E-05 | 0.21354 | 192 | 0.105658571 | 0.046037978 |
| SNP_A.K_709240_4_8242332    | 4  | 8242332  | 3.69E-05 | 0.07552 | 192 | 0.105638612 | 0.046094189 |
| SNP_A.K_709630_4_8278656    | 4  | 8278656  | 3.70E-05 | 0.08073 | 192 | 0.105613903 | 0.046170479 |
| SNP_A.K_710058_4_8313170    | 4  | 8313170  | 3.72E-05 | 0.05729 | 192 | 0.105565553 | 0.046346748 |
| SNP_A.K_708989_4_8212358    | 4  | 8212358  | 3.72E-05 | 0.07813 | 192 | 0.105549012 | 0.04636117  |
| SNP_A.K_708990_4_8212360    | 4  | 8212360  | 3.72E-05 | 0.07813 | 192 | 0.105549012 | 0.04636117  |
| SNP_A.K_1813072_11_8490320  | 11 | 8490320  | 3.73E-05 | 0.17969 | 192 | 0.105510801 | 0.046377726 |
| SNP_A.K_1362679_8_5697697   | 8  | 5697697  | 3.74E-05 | 0.27344 | 192 | 0.105504446 | 0.046377726 |
| SNP_A.K_1488053_8_26996242  | 8  | 26996242 | 3.74E-05 | 0.0625  | 192 | 0.105498361 | 0.046377726 |
| SNP_A.K_725218_4_11763287   | 4  | 11763287 | 3.74E-05 | 0.11719 | 192 | 0.105494558 | 0.046377726 |
| SNP_A.K_1552845_9_9222177   | 9  | 9222177  | 3.74E-05 | 0.22396 | 192 | 0.10549437  | 0.046377726 |
| SNP_A.K_1552372_9_9170885   | 9  | 9170885  | 3.74E-05 | 0.15104 | 192 | 0.105481759 | 0.046377726 |
| SNP_A.K_709012_4_8212726    | 4  | 8212726  | 3.75E-05 | 0.07552 | 192 | 0.105470059 | 0.046377726 |
| SNP_A.K_708862_4_8118733    | 4  | 8118733  | 3.75E-05 | 0.08073 | 192 | 0.105468127 | 0.046377726 |
| SNP_A.K_709748_4_8284701    | 4  | 8284701  | 3.75E-05 | 0.07552 | 192 | 0.105465827 | 0.046377726 |
| SNP_A.K_709671_4_8280257    | 4  | 8280257  | 3.75E-05 | 0.07552 | 192 | 0.105465827 | 0.046377726 |
| SNP_A.K_2044323_12_19674278 | 12 | 19674278 | 3.75E-05 | 0.21094 | 192 | 0.105460529 | 0.046377726 |
| SNP_A.K_726962_4_12061583   | 4  | 12061583 | 3.75E-05 | 0.22656 | 192 | 0.105460142 | 0.046377726 |
| SNP_A.K_1812893_11_8477436  | 11 | 8477436  | 3.75E-05 | 0.17969 | 192 | 0.105460139 | 0.046377726 |
| SNP_A.K_624105_3_27923525   | 3  | 27923525 | 3.76E-05 | 0.20833 | 192 | 0.105450911 | 0.046389234 |
| SNP_A.K_709700_4_8282371    | 4  | 8282371  | 3.77E-05 | 0.07813 | 192 | 0.105420082 | 0.046483701 |
| SNP_A.K_708876_4_8120724    | 4  | 8120724  | 3.77E-05 | 0.07813 | 192 | 0.105409481 | 0.046483701 |
| SNP_A.K_1552693_9_9210864   | 9  | 9210864  | 3.77E-05 | 0.14063 | 192 | 0.105409113 | 0.046483701 |
| SNP_A.K_709582_4_8274798    | 4  | 8274798  | 3.80E-05 | 0.07552 | 192 | 0.105320898 | 0.046799623 |
| SNP_A.K_709583_4_8274808    | 4  | 8274808  | 3.80E-05 | 0.07552 | 192 | 0.105320898 | 0.046799623 |
| SNP_A.K_1815533_11_8854827  | 11 | 8854827  | 3.80E-05 | 0.18229 | 192 | 0.105314145 | 0.046799623 |
| SNP_A.K_708619_4_8064651    | 4  | 8064651  | 3.80E-05 | 0.07552 | 192 | 0.105308929 | 0.046799623 |
| SNP_A.K_709374_4_8259506    | 4  | 8259506  | 3.81E-05 | 0.07552 | 192 | 0.105280709 | 0.046884937 |
| SNP_A.K_709133_4_8233148    | 4  | 8233148  | 3.82E-05 | 0.08073 | 192 | 0.105276022 | 0.046884937 |
| SNP_A.K_709351_4_8258358    | 4  | 8258358  | 3.82E-05 | 0.08073 | 192 | 0.105255344 | 0.046932466 |
| SNP_A.K_709662_4_8279620    | 4  | 8279620  | 3.82E-05 | 0.07552 | 192 | 0.105251986 | 0.046932466 |
| SNP_A.K_725803_4_11866461   | 4  | 11866461 | 3.83E-05 | 0.17969 | 192 | 0.105221156 | 0.047036954 |

|                             |    |          |          |         |     |             |             |
|-----------------------------|----|----------|----------|---------|-----|-------------|-------------|
| SNP_A.K_708823_4_8115278    | 4  | 8115278  | 3.84E-05 | 0.07552 | 192 | 0.105206417 | 0.047040378 |
| SNP_A.K_709690_4_8281328    | 4  | 8281328  | 3.84E-05 | 0.07552 | 192 | 0.105193195 | 0.047040378 |
| SNP_A.K_709226_4_8241858    | 4  | 8241858  | 3.84E-05 | 0.07552 | 192 | 0.105192816 | 0.047040378 |
| SNP_A.K_1813429_11_8538050  | 11 | 8538050  | 3.85E-05 | 0.18229 | 192 | 0.105191133 | 0.047040378 |
| SNP_A.K_709576_4_8274572    | 4  | 8274572  | 3.85E-05 | 0.08073 | 192 | 0.105179321 | 0.047040378 |
| SNP_A.K_1813276_11_8526906  | 11 | 8526906  | 3.85E-05 | 0.18229 | 192 | 0.105175463 | 0.047040378 |
| SNP_A.K_709611_4_8278146    | 4  | 8278146  | 3.85E-05 | 0.07552 | 192 | 0.105175249 | 0.047040378 |
| SNP_A.K_1744595_10_18874750 | 10 | 18874750 | 3.86E-05 | 0.08594 | 192 | 0.105160506 | 0.047076089 |
| SNP_A.K_723328_4_11432881   | 4  | 11432881 | 3.87E-05 | 0.21354 | 192 | 0.105112692 | 0.0472438   |
| SNP_A.K_689582_4_4270640    | 4  | 4270640  | 3.87E-05 | 0.07552 | 192 | 0.105108694 | 0.0472438   |
| SNP_A.K_709675_4_8280356    | 4  | 8280356  | 3.88E-05 | 0.07552 | 192 | 0.105093954 | 0.0472797   |
| SNP_A.K_709553_4_8273667    | 4  | 8273667  | 3.89E-05 | 0.08073 | 192 | 0.105074589 | 0.047307662 |
| SNP_A.K_932655_5_20903915   | 5  | 20903915 | 3.89E-05 | 0.22917 | 192 | 0.105069232 | 0.047307662 |
| SNP_A.K_1814658_11_8767714  | 11 | 8767714  | 3.89E-05 | 0.18229 | 192 | 0.105064655 | 0.047307662 |
| SNP_A.K_685800_4_2515817    | 4  | 2515817  | 3.90E-05 | 0.0599  | 192 | 0.105047926 | 0.047307662 |
| SNP_A.K_724878_4_11690680   | 4  | 11690680 | 3.90E-05 | 0.11458 | 192 | 0.105044372 | 0.047307662 |
| SNP_A.K_708560_4_8061430    | 4  | 8061430  | 3.90E-05 | 0.07552 | 192 | 0.10502871  | 0.047307662 |
| SNP_A.K_708693_4_8086575    | 4  | 8086575  | 3.90E-05 | 0.07552 | 192 | 0.105026865 | 0.047307662 |
| SNP_A.K_1777272_11_2484065  | 11 | 2484065  | 3.91E-05 | 0.1849  | 192 | 0.105019454 | 0.047307662 |
| SNP_A.K_932653_5_20903302   | 5  | 20903302 | 3.91E-05 | 0.23177 | 192 | 0.10501228  | 0.047307662 |
| SNP_A.K_709389_4_8264076    | 4  | 8264076  | 3.91E-05 | 0.07552 | 192 | 0.105004536 | 0.047307662 |
| SNP_A.K_710348_4_8337372    | 4  | 8337372  | 3.91E-05 | 0.09115 | 192 | 0.105003121 | 0.047307662 |
| SNP_A.K_1813097_11_8514861  | 11 | 8514861  | 3.92E-05 | 0.1901  | 192 | 0.104990717 | 0.047307662 |
| SNP_A.K_708657_4_8071788    | 4  | 8071788  | 3.92E-05 | 0.07552 | 192 | 0.104980285 | 0.047307662 |
| SNP_A.K_708987_4_8212272    | 4  | 8212272  | 3.92E-05 | 0.07552 | 192 | 0.104980285 | 0.047307662 |
| SNP_A.K_709432_4_8265884    | 4  | 8265884  | 3.92E-05 | 0.07552 | 192 | 0.104980285 | 0.047307662 |
| SNP_A.K_709615_4_8278276    | 4  | 8278276  | 3.92E-05 | 0.07552 | 192 | 0.104980285 | 0.047307662 |
| SNP_A.K_253138_1_40864925   | 1  | 40864925 | 3.92E-05 | 0.43229 | 192 | 0.104978249 | 0.047307662 |
| SNP_A.K_1813395_11_8536289  | 11 | 8536289  | 3.92E-05 | 0.18229 | 192 | 0.104968846 | 0.047307662 |
| SNP_A.K_1777336_11_2488556  | 11 | 2488556  | 3.93E-05 | 0.17708 | 192 | 0.104966279 | 0.047307662 |
| SNP_A.K_1953581_12_3603155  | 12 | 3603155  | 3.93E-05 | 0.11198 | 192 | 0.104954735 | 0.047330134 |
| SNP_A.K_1814860_11_8783303  | 11 | 8783303  | 3.94E-05 | 0.17708 | 192 | 0.104915903 | 0.047388521 |
| SNP_A.K_1814833_11_8780383  | 11 | 8780383  | 3.94E-05 | 0.17708 | 192 | 0.104915903 | 0.047388521 |
| SNP_A.K_1814853_11_8783155  | 11 | 8783155  | 3.94E-05 | 0.17708 | 192 | 0.104915903 | 0.047388521 |
| SNP_A.K_1814897_11_8784559  | 11 | 8784559  | 3.94E-05 | 0.17708 | 192 | 0.104915903 | 0.047388521 |
| SNP_A.K_709616_4_8278295    | 4  | 8278295  | 3.95E-05 | 0.07552 | 192 | 0.104893565 | 0.047457857 |
| SNP_A.K_729005_4_12425668   | 4  | 12425668 | 3.96E-05 | 0.1901  | 192 | 0.10486797  | 0.047541455 |
| SNP_A.K_708732_4_8089798    | 4  | 8089798  | 3.97E-05 | 0.07552 | 192 | 0.104853345 | 0.047577539 |
| SNP_A.K_1552011_9_9138555   | 9  | 9138555  | 3.98E-05 | 0.26563 | 192 | 0.104812487 | 0.047704924 |
| SNP_A.K_1794053_11_5377516  | 11 | 5377516  | 3.98E-05 | 0.04948 | 192 | 0.104803543 | 0.047704924 |
| SNP_A.K_709735_4_8284322    | 4  | 8284322  | 3.99E-05 | 0.07552 | 192 | 0.104799968 | 0.047704924 |
| SNP_A.K_726267_4_11932218   | 4  | 11932218 | 3.99E-05 | 0.21354 | 192 | 0.104798838 | 0.047704924 |
| SNP_A.K_708691_4_8086292    | 4  | 8086292  | 3.99E-05 | 0.07552 | 192 | 0.104780743 | 0.047707943 |
| SNP_A.K_709366_4_8258985    | 4  | 8258985  | 3.99E-05 | 0.07552 | 192 | 0.104779268 | 0.047707943 |
| SNP_A.K_709367_4_8259002    | 4  | 8259002  | 3.99E-05 | 0.07552 | 192 | 0.104779268 | 0.047707943 |
| SNP_A.K_708011_4_7496094    | 4  | 7496094  | 4.00E-05 | 0.23438 | 192 | 0.104760394 | 0.047734434 |
| SNP_A.K_1815433_11_8851795  | 11 | 8851795  | 4.00E-05 | 0.15625 | 192 | 0.104756597 | 0.047734434 |
| SNP_A.K_709680_4_8280834    | 4  | 8280834  | 4.00E-05 | 0.07552 | 192 | 0.104754344 | 0.047734434 |
| SNP_A.K_723682_4_11487985   | 4  | 11487985 | 4.02E-05 | 0.1224  | 192 | 0.104703564 | 0.047928832 |
| SNP_A.K_1813770_11_8576517  | 11 | 8576517  | 4.03E-05 | 0.18229 | 192 | 0.104681625 | 0.047997461 |



|                             |    |          |          |         |     |             |             |
|-----------------------------|----|----------|----------|---------|-----|-------------|-------------|
| SNP_A.K_2078742_12_27020700 | 12 | 27020700 | 4.04E-05 | 0.02083 | 192 | 0.104653571 | 0.048093061 |
| SNP_A.K_709618_4_8278356    | 4  | 8278356  | 4.04E-05 | 0.07813 | 192 | 0.104636723 | 0.048139579 |
| SNP_A.K_709643_4_8279064    | 4  | 8279064  | 4.05E-05 | 0.07813 | 192 | 0.104629963 | 0.048141782 |
| SNP_A.K_814121_4_31132534   | 4  | 31132534 | 4.05E-05 | 0.05208 | 192 | 0.104615419 | 0.048169324 |
| SNP_A.K_1812977_11_8484543  | 11 | 8484543  | 4.05E-05 | 0.14583 | 192 | 0.104611195 | 0.048169324 |
| SNP_A.K_709004_4_8212637    | 4  | 8212637  | 4.07E-05 | 0.07292 | 192 | 0.104582389 | 0.048268667 |
| SNP_A.K_709375_4_8259632    | 4  | 8259632  | 4.07E-05 | 0.07552 | 192 | 0.104573489 | 0.048280379 |
| SNP_A.K_1813584_11_8557400  | 11 | 8557400  | 4.08E-05 | 0.17969 | 192 | 0.104530909 | 0.048440901 |
| SNP_A.K_708003_4_7494623    | 4  | 7494623  | 4.09E-05 | 0.23698 | 192 | 0.104513788 | 0.048489088 |
| SNP_A.K_724859_4_11689480   | 4  | 11689480 | 4.10E-05 | 0.19271 | 192 | 0.104480561 | 0.048608804 |
| SNP_A.K_724479_4_11607080   | 4  | 11607080 | 4.11E-05 | 0.29427 | 192 | 0.104460133 | 0.048671893 |
| SNP_A.K_1552266_9_9164047   | 9  | 9164047  | 4.12E-05 | 0.15365 | 192 | 0.104436477 | 0.048730039 |
| SNP_A.K_709098_4_8223160    | 4  | 8223160  | 4.12E-05 | 0.08073 | 192 | 0.10442951  | 0.048730039 |
| SNP_A.K_708801_4_8114788    | 4  | 8114788  | 4.12E-05 | 0.07813 | 192 | 0.1044284   | 0.048730039 |
| SNP_A.K_725252_4_11768581   | 4  | 11768581 | 4.13E-05 | 0.21875 | 192 | 0.104419643 | 0.04874136  |
| SNP_A.K_1763159_10_21646632 | 10 | 21646632 | 4.15E-05 | 0.1875  | 192 | 0.104367877 | 0.048944641 |
| SNP_A.K_708316_4_7902431    | 4  | 7902431  | 4.15E-05 | 0.23177 | 192 | 0.104348654 | 0.048981332 |
| SNP_A.K_710497_4_8424991    | 4  | 8424991  | 4.15E-05 | 0.07813 | 192 | 0.104347265 | 0.048981332 |
| SNP_A.K_290404_2_5328871    | 2  | 5328871  | 4.16E-05 | 0.08594 | 192 | 0.104340848 | 0.048982306 |
| SNP_A.K_1552033_9_9140182   | 9  | 9140182  | 4.18E-05 | 0.33854 | 192 | 0.104288524 | 0.049182201 |
| SNP_A.K_709074_4_8217101    | 4  | 8217101  | 4.18E-05 | 0.08073 | 192 | 0.104283888 | 0.049182201 |
| SNP_A.K_1813626_11_8561415  | 11 | 8561415  | 4.18E-05 | 0.16927 | 192 | 0.104277039 | 0.04918517  |
| SNP_A.K_728153_4_12282417   | 4  | 12282417 | 4.19E-05 | 0.25781 | 192 | 0.104249252 | 0.049282355 |
| SNP_A.K_1814869_11_8783655  | 11 | 8783655  | 4.20E-05 | 0.1849  | 192 | 0.104228932 | 0.049338364 |
| SNP_A.K_725305_4_11791553   | 4  | 11791553 | 4.20E-05 | 0.1224  | 192 | 0.104224463 | 0.049338364 |
| SNP_A.K_253068_1_40850409   | 1  | 40850409 | 4.21E-05 | 0.16406 | 192 | 0.10420404  | 0.049402654 |
| SNP_A.K_709208_4_8239037    | 4  | 8239037  | 4.22E-05 | 0.07813 | 192 | 0.104185856 | 0.049456921 |
| SNP_A.K_1777337_11_2488638  | 11 | 2488638  | 4.22E-05 | 0.17969 | 192 | 0.104171163 | 0.049475335 |
| SNP_A.K_1813180_11_8521517  | 11 | 8521517  | 4.22E-05 | 0.1849  | 192 | 0.104169453 | 0.049475335 |
| SNP_A.K_650908_3_32280631   | 3  | 32280631 | 4.23E-05 | 0.21615 | 192 | 0.104139441 | 0.049583306 |
| SNP_A.K_1814644_11_8767095  | 11 | 8767095  | 4.24E-05 | 0.1849  | 192 | 0.104123067 | 0.049629635 |
| SNP_A.K_1648670_10_4748578  | 10 | 4748578  | 4.24E-05 | 0.05469 | 192 | 0.104114848 | 0.049639009 |

Seed\_coat\_color

| SNP                       | Chr | Position | P.value  | maf     | nobs | Rsquare.of.Model.w | FDR_Adjusted_P-values |
|---------------------------|-----|----------|----------|---------|------|--------------------|-----------------------|
| SNP_A.K_1188748_7_6124457 | 7   | 6124457  | 2.17E-14 | 0.45652 | 299  | 0.616237178        | 4.52E-08              |
| SNP_A.K_1188775_7_6195128 | 7   | 6195128  | 2.10E-12 | 0.23746 | 299  | 0.598211775        | 1.60E-06              |
| SNP_A.K_1189244_7_6660825 | 7   | 6660825  | 2.31E-12 | 0.45485 | 299  | 0.597852159        | 1.60E-06              |
| SNP_A.K_1189255_7_6663350 | 7   | 6663350  | 6.55E-12 | 0.46154 | 299  | 0.593832819        | 3.18E-06              |
| SNP_A.K_1188749_7_6128379 | 7   | 6128379  | 7.63E-12 | 0.199   | 299  | 0.593244316        | 3.18E-06              |
| SNP_A.K_1189276_7_6665511 | 7   | 6665511  | 1.30E-11 | 0.45318 | 299  | 0.591212513        | 4.50E-06              |
| SNP_A.K_1189246_7_6661169 | 7   | 6661169  | 1.85E-11 | 0.46154 | 299  | 0.589861025        | 4.82E-06              |
| SNP_A.K_1188751_7_6133394 | 7   | 6133394  | 1.85E-11 | 0.3495  | 299  | 0.589853064        | 4.82E-06              |
| SNP_A.K_1189214_7_6658617 | 7   | 6658617  | 4.64E-11 | 0.47492 | 299  | 0.586363754        | 1.07E-05              |
| SNP_A.K_1188921_7_6434432 | 7   | 6434432  | 6.70E-11 | 0.42642 | 299  | 0.584976528        | 1.26E-05              |
| SNP_A.K_1189309_7_6670284 | 7   | 6670284  | 6.72E-11 | 0.46488 | 299  | 0.58496537         | 1.26E-05              |
| SNP_A.K_1189258_7_6663434 | 7   | 6663434  | 7.28E-11 | 0.46154 | 299  | 0.584666378        | 1.26E-05              |
| SNP_A.K_1189226_7_6659524 | 7   | 6659524  | 8.62E-11 | 0.38294 | 299  | 0.584026021        | 1.38E-05              |
| SNP_A.K_1189282_7_6666905 | 7   | 6666905  | 1.41E-10 | 0.45485 | 299  | 0.582181927        | 2.04E-05              |
| SNP_A.K_1188838_7_6361858 | 7   | 6361858  | 1.47E-10 | 0.49331 | 299  | 0.582017513        | 2.04E-05              |
| SNP_A.K_1189339_7_6685920 | 7   | 6685920  | 1.79E-10 | 0.43645 | 299  | 0.581281759        | 2.28E-05              |

|                           |   |         |          |         |     |             |             |
|---------------------------|---|---------|----------|---------|-----|-------------|-------------|
| SNP_A.K_1189250_7_6662451 | 7 | 6662451 | 1.99E-10 | 0.45987 | 299 | 0.580881558 | 2.28E-05    |
| SNP_A.K_1188817_7_6342940 | 7 | 6342940 | 2.05E-10 | 0.49498 | 299 | 0.580781978 | 2.28E-05    |
| SNP_A.K_1189294_7_6668920 | 7 | 6668920 | 2.08E-10 | 0.45987 | 299 | 0.580724401 | 2.28E-05    |
| SNP_A.K_1188773_7_6192768 | 7 | 6192768 | 3.15E-10 | 0.28094 | 299 | 0.579172248 | 3.28E-05    |
| SNP_A.K_1189249_7_6661790 | 7 | 6661790 | 3.42E-10 | 0.45819 | 299 | 0.578860056 | 3.36E-05    |
| SNP_A.K_1189215_7_6658783 | 7 | 6658783 | 3.55E-10 | 0.44482 | 299 | 0.578727326 | 3.36E-05    |
| SNP_A.K_1189285_7_6667624 | 7 | 6667624 | 4.65E-10 | 0.44314 | 299 | 0.577719996 | 4.21E-05    |
| SNP_A.K_1189336_7_6685769 | 7 | 6685769 | 7.00E-10 | 0.45819 | 299 | 0.576201084 | 6.07E-05    |
| SNP_A.K_1189245_7_6660873 | 7 | 6660873 | 7.52E-10 | 0.44649 | 299 | 0.575936089 | 6.26E-05    |
| SNP_A.K_1188742_7_6062744 | 7 | 6062744 | 7.95E-10 | 0.4398  | 299 | 0.575730482 | 6.36E-05    |
| SNP_A.K_1189239_7_6660353 | 7 | 6660353 | 8.50E-10 | 0.45485 | 299 | 0.575482821 | 6.55E-05    |
| SNP_A.K_1188769_7_6185067 | 7 | 6185067 | 9.10E-10 | 0.40635 | 299 | 0.575227013 | 6.77E-05    |
| SNP_A.K_1189280_7_6666646 | 7 | 6666646 | 1.03E-09 | 0.45485 | 299 | 0.574761275 | 7.41E-05    |
| SNP_A.K_1188764_7_6170573 | 7 | 6170573 | 1.15E-09 | 0.41973 | 299 | 0.574357637 | 7.99E-05    |
| SNP_A.K_1189216_7_6658844 | 7 | 6658844 | 1.24E-09 | 0.4398  | 299 | 0.574097256 | 8.30E-05    |
| SNP_A.K_1188816_7_6341838 | 7 | 6341838 | 1.57E-09 | 0.48662 | 299 | 0.573218726 | 9.77E-05    |
| SNP_A.K_1189213_7_6658535 | 7 | 6658535 | 1.60E-09 | 0.45151 | 299 | 0.573148832 | 9.77E-05    |
| SNP_A.K_1189287_7_6667699 | 7 | 6667699 | 1.61E-09 | 0.44983 | 299 | 0.573120591 | 9.77E-05    |
| SNP_A.K_1188866_7_6416752 | 7 | 6416752 | 1.67E-09 | 0.43144 | 299 | 0.572982216 | 9.77E-05    |
| SNP_A.K_1189234_7_6659826 | 7 | 6659826 | 1.69E-09 | 0.46154 | 299 | 0.572945073 | 9.77E-05    |
| SNP_A.K_1189305_7_6670198 | 7 | 6670198 | 1.94E-09 | 0.44816 | 299 | 0.572433882 | 0.000109214 |
| SNP_A.K_1188778_7_6204740 | 7 | 6204740 | 2.10E-09 | 0.2893  | 299 | 0.572146249 | 0.000114995 |
| SNP_A.K_1188867_7_6417000 | 7 | 6417000 | 3.06E-09 | 0.41304 | 299 | 0.570764127 | 0.0001633   |
| SNP_A.K_1189286_7_6667646 | 7 | 6667646 | 3.59E-09 | 0.49666 | 299 | 0.570182066 | 0.000186652 |
| SNP_A.K_1189201_7_6655953 | 7 | 6655953 | 5.03E-09 | 0.46321 | 299 | 0.568943035 | 0.000255605 |
| SNP_A.K_1189281_7_6666734 | 7 | 6666734 | 5.36E-09 | 0.44816 | 299 | 0.568717635 | 0.000265422 |
| SNP_A.K_1188797_7_6299925 | 7 | 6299925 | 6.51E-09 | 0.49666 | 299 | 0.568008606 | 0.0003113   |
| SNP_A.K_1188695_7_6049723 | 7 | 6049723 | 6.58E-09 | 0.41806 | 299 | 0.567967089 | 0.0003113   |
| SNP_A.K_1188795_7_6292339 | 7 | 6292339 | 9.82E-09 | 0.31605 | 299 | 0.566511298 | 0.000448477 |
| SNP_A.K_1188837_7_6360143 | 7 | 6360143 | 9.91E-09 | 0.49164 | 299 | 0.566478333 | 0.000448477 |
| SNP_A.K_1189292_7_6668810 | 7 | 6668810 | 1.04E-08 | 0.46488 | 299 | 0.566287823 | 0.00046254  |
| SNP_A.K_1189217_7_6658871 | 7 | 6658871 | 1.07E-08 | 0.46823 | 299 | 0.566211911 | 0.00046254  |
| SNP_A.K_1188818_7_6356862 | 7 | 6356862 | 1.10E-08 | 0.49666 | 299 | 0.566116582 | 0.000465169 |
| SNP_A.K_1188801_7_6303351 | 7 | 6303351 | 1.28E-08 | 0.42809 | 299 | 0.565559276 | 0.000531653 |
| SNP_A.K_1189224_7_6659256 | 7 | 6659256 | 1.34E-08 | 0.40803 | 299 | 0.565394775 | 0.000545456 |
| SNP_A.K_1189203_7_6656052 | 7 | 6656052 | 1.63E-08 | 0.42308 | 299 | 0.564675863 | 0.000645922 |
| SNP_A.K_1188785_7_6220391 | 7 | 6220391 | 1.64E-08 | 0.33612 | 299 | 0.564644164 | 0.000645922 |
| SNP_A.K_1188662_7_6040708 | 7 | 6040708 | 2.64E-08 | 0.43478 | 299 | 0.56293053  | 0.001019536 |
| SNP_A.K_1188822_7_6357186 | 7 | 6357186 | 2.85E-08 | 0.48161 | 299 | 0.562664807 | 0.001065557 |
| SNP_A.K_1189221_7_6659045 | 7 | 6659045 | 2.87E-08 | 0.42642 | 299 | 0.562640795 | 0.001065557 |
| SNP_A.K_1189222_7_6659158 | 7 | 6659158 | 3.36E-08 | 0.37291 | 299 | 0.562067864 | 0.001224508 |
| SNP_A.K_1188495_7_6021907 | 7 | 6021907 | 3.41E-08 | 0.3612  | 299 | 0.562014862 | 0.001224508 |
| SNP_A.K_1188850_7_6378583 | 7 | 6378583 | 3.88E-08 | 0.47993 | 299 | 0.561557885 | 0.00136716  |
| SNP_A.K_1188806_7_6309365 | 7 | 6309365 | 3.94E-08 | 0.43813 | 299 | 0.561496625 | 0.001367525 |
| SNP_A.K_1188871_7_6419242 | 7 | 6419242 | 4.35E-08 | 0.25585 | 299 | 0.561141965 | 0.001484938 |
| SNP_A.K_1189231_7_6659699 | 7 | 6659699 | 4.67E-08 | 0.4214  | 299 | 0.560892147 | 0.001566471 |
| SNP_A.K_1189227_7_6659547 | 7 | 6659547 | 5.10E-08 | 0.39465 | 299 | 0.560574554 | 0.001675705 |
| SNP_A.K_1189304_7_6670188 | 7 | 6670188 | 5.15E-08 | 0.42642 | 299 | 0.560537071 | 0.001675705 |
| SNP_A.K_1189302_7_6670108 | 7 | 6670108 | 5.28E-08 | 0.40301 | 299 | 0.560448295 | 0.001691362 |
| SNP_A.K_1189297_7_6668991 | 7 | 6668991 | 6.18E-08 | 0.47659 | 299 | 0.559886855 | 0.001948882 |

|                             |    |          |          |         |     |             |             |
|-----------------------------|----|----------|----------|---------|-----|-------------|-------------|
| SNP_A.K_1189273_7_6664854   | 7  | 6664854  | 6.59E-08 | 0.47659 | 299 | 0.559656691 | 0.002047537 |
| SNP_A.K_1188842_7_6368381   | 7  | 6368381  | 7.52E-08 | 0.47324 | 299 | 0.559185778 | 0.002301899 |
| SNP_A.K_1188926_7_6434733   | 7  | 6434733  | 8.21E-08 | 0.34281 | 299 | 0.55887317  | 0.00247635  |
| SNP_A.K_1189284_7_6667552   | 7  | 6667552  | 9.45E-08 | 0.47492 | 299 | 0.558369823 | 0.002811355 |
| SNP_A.K_1188723_7_6057246   | 7  | 6057246  | 1.08E-07 | 0.3913  | 299 | 0.557882603 | 0.003178438 |
| SNP_A.K_1189194_7_6655801   | 7  | 6655801  | 1.15E-07 | 0.46321 | 299 | 0.557683328 | 0.003314962 |
| SNP_A.K_1189240_7_6660546   | 7  | 6660546  | 1.17E-07 | 0.4214  | 299 | 0.557610343 | 0.003337378 |
| SNP_A.K_1188698_7_6049928   | 7  | 6049928  | 1.23E-07 | 0.42308 | 299 | 0.55744269  | 0.003451328 |
| SNP_A.K_1189197_7_6655874   | 7  | 6655874  | 1.33E-07 | 0.44314 | 299 | 0.557146915 | 0.003701053 |
| SNP_A.K_1188874_7_6420399   | 7  | 6420399  | 1.52E-07 | 0.26087 | 299 | 0.556672925 | 0.004174354 |
| SNP_A.K_1189223_7_6659177   | 7  | 6659177  | 1.64E-07 | 0.40635 | 299 | 0.556422354 | 0.004421907 |
| SNP_A.K_1188704_7_6050283   | 7  | 6050283  | 1.74E-07 | 0.41973 | 299 | 0.556213312 | 0.004630521 |
| SNP_A.K_1188405_7_6015206   | 7  | 6015206  | 1.81E-07 | 0.41137 | 299 | 0.556057598 | 0.00471938  |
| SNP_A.K_1189315_7_6671037   | 7  | 6671037  | 1.81E-07 | 0.40635 | 299 | 0.556056338 | 0.00471938  |
| SNP_A.K_1188706_7_6050559   | 7  | 6050559  | 1.92E-07 | 0.42809 | 299 | 0.555854521 | 0.004934588 |
| SNP_A.K_1188626_7_6033981   | 7  | 6033981  | 2.00E-07 | 0.42308 | 299 | 0.555702075 | 0.005089016 |
| SNP_A.K_1188389_7_6012422   | 7  | 6012422  | 2.04E-07 | 0.46823 | 299 | 0.555646995 | 0.005106604 |
| SNP_A.K_1188702_7_6050170   | 7  | 6050170  | 2.08E-07 | 0.42977 | 299 | 0.555569332 | 0.005136578 |
| SNP_A.K_1188758_7_6151209   | 7  | 6151209  | 2.10E-07 | 0.24415 | 299 | 0.555542088 | 0.005136578 |
| SNP_A.K_1843481_11_12777382 | 11 | 12777382 | 2.15E-07 | 0.43645 | 299 | 0.555448265 | 0.005213374 |
| SNP_A.K_1188629_7_6034130   | 7  | 6034130  | 2.18E-07 | 0.42977 | 299 | 0.55539937  | 0.005219636 |
| SNP_A.K_1189006_7_6440865   | 7  | 6440865  | 2.21E-07 | 0.25418 | 299 | 0.555362755 | 0.005219636 |
| SNP_A.K_1188705_7_6050288   | 7  | 6050288  | 2.40E-07 | 0.42809 | 299 | 0.555071991 | 0.005603671 |
| SNP_A.K_1189259_7_6663452   | 7  | 6663452  | 2.54E-07 | 0.41137 | 299 | 0.554869897 | 0.005867814 |
| SNP_A.K_1188620_7_6033330   | 7  | 6033330  | 2.60E-07 | 0.43311 | 299 | 0.554787117 | 0.005941039 |
| SNP_A.K_1189209_7_6657226   | 7  | 6657226  | 2.68E-07 | 0.40635 | 299 | 0.554678264 | 0.006060552 |
| SNP_A.K_1189303_7_6670110   | 7  | 6670110  | 2.84E-07 | 0.38127 | 299 | 0.554476423 | 0.006305549 |
| SNP_A.K_1188429_7_6018267   | 7  | 6018267  | 2.85E-07 | 0.41806 | 299 | 0.554462611 | 0.006305549 |
| SNP_A.K_1188685_7_6046792   | 7  | 6046792  | 3.08E-07 | 0.4214  | 299 | 0.554181424 | 0.006757217 |
| SNP_A.K_1188590_7_6031361   | 7  | 6031361  | 3.38E-07 | 0.41806 | 299 | 0.55386246  | 0.007320574 |
| SNP_A.K_1188656_7_6038256   | 7  | 6038256  | 3.48E-07 | 0.42475 | 299 | 0.553754116 | 0.007471529 |
| SNP_A.K_1189141_7_6482231   | 7  | 6482231  | 3.68E-07 | 0.21906 | 299 | 0.553561486 | 0.007740499 |
| SNP_A.K_1188611_7_6032549   | 7  | 6032549  | 3.68E-07 | 0.41304 | 299 | 0.553557828 | 0.007740499 |
| SNP_A.K_1188625_7_6033966   | 7  | 6033966  | 3.78E-07 | 0.4214  | 299 | 0.553468949 | 0.007859162 |
| SNP_A.K_1188703_7_6050264   | 7  | 6050264  | 3.83E-07 | 0.42308 | 299 | 0.553416828 | 0.007897514 |
| SNP_A.K_1188722_7_6056506   | 7  | 6056506  | 3.92E-07 | 0.41806 | 299 | 0.553337281 | 0.007998987 |
| SNP_A.K_1188700_7_6050091   | 7  | 6050091  | 4.02E-07 | 0.42642 | 299 | 0.553251065 | 0.008117967 |
| SNP_A.K_1189196_7_6655864   | 7  | 6655864  | 4.12E-07 | 0.41304 | 299 | 0.553160726 | 0.008249208 |
| SNP_A.K_1188719_7_6053553   | 7  | 6053553  | 4.17E-07 | 0.43144 | 299 | 0.553119973 | 0.008265938 |
| SNP_A.K_1188678_7_6046423   | 7  | 6046423  | 4.61E-07 | 0.42642 | 299 | 0.55276528  | 0.009057883 |
| SNP_A.K_1188621_7_6033401   | 7  | 6033401  | 4.73E-07 | 0.42977 | 299 | 0.552674042 | 0.009209481 |
| SNP_A.K_1188718_7_6053077   | 7  | 6053077  | 4.80E-07 | 0.41137 | 299 | 0.552623464 | 0.009256633 |
| SNP_A.K_1188658_7_6040526   | 7  | 6040526  | 4.86E-07 | 0.42308 | 299 | 0.552584714 | 0.009273531 |
| SNP_A.K_1188708_7_6050841   | 7  | 6050841  | 4.99E-07 | 0.41973 | 299 | 0.552491653 | 0.00943618  |
| SNP_A.K_1188667_7_6042535   | 7  | 6042535  | 5.20E-07 | 0.41806 | 299 | 0.552347323 | 0.009743923 |
| SNP_A.K_1188666_7_6042531   | 7  | 6042531  | 5.30E-07 | 0.41639 | 299 | 0.552280023 | 0.009844026 |
| SNP_A.K_1188717_7_6052907   | 7  | 6052907  | 5.44E-07 | 0.41639 | 299 | 0.552184637 | 0.010025979 |
| SNP_A.K_1188707_7_6050767   | 7  | 6050767  | 5.52E-07 | 0.42475 | 299 | 0.552135884 | 0.010077207 |
| SNP_A.K_1189059_7_6452713   | 7  | 6452713  | 5.73E-07 | 0.26756 | 299 | 0.552004629 | 0.010370773 |
| SNP_A.K_1188896_7_6423302   | 7  | 6423302  | 5.82E-07 | 0.2592  | 299 | 0.551950643 | 0.010441001 |

|                            |    |         |          |         |     |             |             |
|----------------------------|----|---------|----------|---------|-----|-------------|-------------|
| SNP_A.K_1188686_7_6046821  | 7  | 6046821 | 6.02E-07 | 0.42642 | 299 | 0.551833798 | 0.010702851 |
| SNP_A.K_1188691_7_6048797  | 7  | 6048797 | 7.20E-07 | 0.41806 | 299 | 0.551206826 | 0.012601011 |
| SNP_A.K_1188653_7_6035758  | 7  | 6035758 | 7.20E-07 | 0.41973 | 299 | 0.551203078 | 0.012601011 |
| SNP_A.K_1188612_7_6032562  | 7  | 6032562 | 7.41E-07 | 0.41806 | 299 | 0.551105254 | 0.012850558 |
| SNP_A.K_1188628_7_6034007  | 7  | 6034007 | 7.53E-07 | 0.42475 | 299 | 0.551050224 | 0.012946565 |
| SNP_A.K_1188847_7_6377569  | 7  | 6377569 | 7.88E-07 | 0.49331 | 299 | 0.550887757 | 0.013451483 |
| SNP_A.K_1189208_7_6657209  | 7  | 6657209 | 8.14E-07 | 0.40468 | 299 | 0.55077569  | 0.013777065 |
| SNP_A.K_1188589_7_6031314  | 7  | 6031314 | 8.24E-07 | 0.4214  | 299 | 0.550735051 | 0.013825894 |
| SNP_A.K_1188643_7_6035099  | 7  | 6035099 | 8.65E-07 | 0.41639 | 299 | 0.550563327 | 0.014274002 |
| SNP_A.K_1188526_7_6025243  | 7  | 6025243 | 8.70E-07 | 0.40301 | 299 | 0.550543977 | 0.014274002 |
| SNP_A.K_1189172_7_6492992  | 7  | 6492992 | 8.71E-07 | 0.25084 | 299 | 0.550540211 | 0.014274002 |
| SNP_A.K_1189232_7_6659714  | 7  | 6659714 | 8.93E-07 | 0.41304 | 299 | 0.550452169 | 0.014360698 |
| SNP_A.K_1188655_7_6036907  | 7  | 6036907 | 8.94E-07 | 0.42308 | 299 | 0.550448264 | 0.014360698 |
| SNP_A.K_1188776_7_6195235  | 7  | 6195235 | 8.97E-07 | 0.29097 | 299 | 0.550437588 | 0.014360698 |
| SNP_A.K_1188421_7_6017745  | 7  | 6017745 | 9.22E-07 | 0.41639 | 299 | 0.550341714 | 0.014648074 |
| SNP_A.K_1189140_7_6482223  | 7  | 6482223 | 9.41E-07 | 0.26421 | 299 | 0.550269148 | 0.014765607 |
| SNP_A.K_1188475_7_6020813  | 7  | 6020813 | 9.43E-07 | 0.41973 | 299 | 0.550260977 | 0.014765607 |
| SNP_A.K_1189160_7_6487025  | 7  | 6487025 | 9.52E-07 | 0.25753 | 299 | 0.550231287 | 0.014780697 |
| SNP_A.K_1978698_12_8876084 | 12 | 8876084 | 9.71E-07 | 0.08194 | 299 | 0.550160487 | 0.014972097 |
| SNP_A.K_1188805_7_6309120  | 7  | 6309120 | 9.83E-07 | 0.21237 | 299 | 0.55011877  | 0.015040879 |
| SNP_A.K_1188407_7_6015296  | 7  | 6015296 | 9.90E-07 | 0.41973 | 299 | 0.550093102 | 0.015041414 |
| SNP_A.K_1188385_7_6009785  | 7  | 6009785 | 1.00E-06 | 0.42475 | 299 | 0.550057292 | 0.015086585 |
| SNP_A.K_1188416_7_6017492  | 7  | 6017492 | 1.02E-06 | 0.41304 | 299 | 0.549974625 | 0.015337504 |
| SNP_A.K_1188420_7_6017734  | 7  | 6017734 | 1.10E-06 | 0.41806 | 299 | 0.549725954 | 0.016354486 |
| SNP_A.K_1188506_7_6023020  | 7  | 6023020 | 1.12E-06 | 0.39632 | 299 | 0.549672074 | 0.016491658 |
| SNP_A.K_1188482_7_6021197  | 7  | 6021197 | 1.14E-06 | 0.40301 | 299 | 0.549614719 | 0.016564457 |
| SNP_A.K_1188639_7_6034903  | 7  | 6034903 | 1.14E-06 | 0.41806 | 299 | 0.549603433 | 0.016564457 |
| SNP_A.K_1188406_7_6015289  | 7  | 6015289 | 1.15E-06 | 0.41639 | 299 | 0.54956284  | 0.016564457 |
| SNP_A.K_1189133_7_6481768  | 7  | 6481768 | 1.16E-06 | 0.2592  | 299 | 0.549554644 | 0.016564457 |
| SNP_A.K_1188721_7_6055990  | 7  | 6055990 | 1.16E-06 | 0.41304 | 299 | 0.549535403 | 0.016564457 |
| SNP_A.K_1188424_7_6017919  | 7  | 6017919 | 1.19E-06 | 0.41639 | 299 | 0.549448321 | 0.016868545 |
| SNP_A.K_1188780_7_6209682  | 7  | 6209682 | 1.20E-06 | 0.37793 | 299 | 0.549420871 | 0.016887235 |
| SNP_A.K_1188714_7_6052833  | 7  | 6052833 | 1.22E-06 | 0.42308 | 299 | 0.549362681 | 0.016925704 |
| SNP_A.K_1188399_7_6014534  | 7  | 6014534 | 1.23E-06 | 0.41137 | 299 | 0.549348291 | 0.016925704 |
| SNP_A.K_1188672_7_6044448  | 7  | 6044448 | 1.23E-06 | 0.41137 | 299 | 0.549343121 | 0.016925704 |
| SNP_A.K_1188422_7_6017905  | 7  | 6017905 | 1.25E-06 | 0.41472 | 299 | 0.549282808 | 0.017108374 |
| SNP_A.K_1188730_7_6061164  | 7  | 6061164 | 1.27E-06 | 0.42308 | 299 | 0.549212991 | 0.01734113  |
| SNP_A.K_1188644_7_6035140  | 7  | 6035140 | 1.30E-06 | 0.41304 | 299 | 0.549131282 | 0.017401551 |
| SNP_A.K_1189113_7_6472957  | 7  | 6472957 | 1.31E-06 | 0.26254 | 299 | 0.549112582 | 0.017401551 |
| SNP_A.K_1188720_7_6055841  | 7  | 6055841 | 1.32E-06 | 0.42809 | 299 | 0.549102098 | 0.017401551 |
| SNP_A.K_1188398_7_6014305  | 7  | 6014305 | 1.32E-06 | 0.41304 | 299 | 0.549092086 | 0.017401551 |
| SNP_A.K_1188595_7_6031556  | 7  | 6031556 | 1.32E-06 | 0.41472 | 299 | 0.54908818  | 0.017401551 |
| SNP_A.K_1188740_7_6062503  | 7  | 6062503 | 1.33E-06 | 0.39632 | 299 | 0.549059179 | 0.017401551 |
| SNP_A.K_1188423_7_6017907  | 7  | 6017907 | 1.34E-06 | 0.41806 | 299 | 0.549045328 | 0.017401551 |
| SNP_A.K_1188701_7_6050144  | 7  | 6050144 | 1.35E-06 | 0.41973 | 299 | 0.549020997 | 0.01741492  |
| SNP_A.K_1188592_7_6031410  | 7  | 6031410 | 1.39E-06 | 0.33445 | 299 | 0.548913604 | 0.017850501 |
| SNP_A.K_1188552_7_6026786  | 7  | 6026786 | 1.41E-06 | 0.4097  | 299 | 0.548865312 | 0.017989246 |
| SNP_A.K_1189242_7_6660594  | 7  | 6660594 | 1.45E-06 | 0.44816 | 299 | 0.548770791 | 0.018277611 |
| SNP_A.K_1188382_7_6009617  | 7  | 6009617 | 1.46E-06 | 0.41472 | 299 | 0.54875189  | 0.018277611 |
| SNP_A.K_1188741_7_6062705  | 7  | 6062705 | 1.46E-06 | 0.4214  | 299 | 0.548746695 | 0.018277611 |

|                             |    |          |          |         |     |             |             |
|-----------------------------|----|----------|----------|---------|-----|-------------|-------------|
| SNP_A.K_1188683_7_6046692   | 7  | 6046692  | 1.50E-06 | 0.42642 | 299 | 0.548640039 | 0.018734714 |
| SNP_A.K_1188597_7_6031761   | 7  | 6031761  | 1.55E-06 | 0.40301 | 299 | 0.548537256 | 0.019182697 |
| SNP_A.K_1188411_7_6016282   | 7  | 6016282  | 1.57E-06 | 0.41639 | 299 | 0.548489567 | 0.019332946 |
| SNP_A.K_1978596_12_8865436  | 12 | 8865436  | 1.60E-06 | 0.08696 | 299 | 0.548428179 | 0.019472549 |
| SNP_A.K_1188955_7_6436503   | 7  | 6436503  | 1.60E-06 | 0.25753 | 299 | 0.548423756 | 0.019472549 |
| SNP_A.K_1188415_7_6017211   | 7  | 6017211  | 1.62E-06 | 0.41472 | 299 | 0.548383585 | 0.019565596 |
| SNP_A.K_1980465_12_9078697  | 12 | 9078697  | 1.63E-06 | 0.12542 | 299 | 0.548353855 | 0.019565596 |
| SNP_A.K_1188954_7_6436498   | 7  | 6436498  | 1.65E-06 | 0.25418 | 299 | 0.548314384 | 0.019565596 |
| SNP_A.K_1978716_12_8877270  | 12 | 8877270  | 1.66E-06 | 0.08194 | 299 | 0.548297996 | 0.019565596 |
| SNP_A.K_1188419_7_6017702   | 7  | 6017702  | 1.67E-06 | 0.41472 | 299 | 0.548281418 | 0.019565596 |
| SNP_A.K_1188430_7_6018298   | 7  | 6018298  | 1.67E-06 | 0.41304 | 299 | 0.548281394 | 0.019565596 |
| SNP_A.K_1188671_7_6044440   | 7  | 6044440  | 1.67E-06 | 0.41137 | 299 | 0.548267999 | 0.019565596 |
| SNP_A.K_1189124_7_6474124   | 7  | 6474124  | 1.69E-06 | 0.26756 | 299 | 0.548236946 | 0.019631229 |
| SNP_A.K_1188674_7_6044536   | 7  | 6044536  | 1.74E-06 | 0.40134 | 299 | 0.548138585 | 0.020007921 |
| SNP_A.K_1188642_7_6035030   | 7  | 6035030  | 1.74E-06 | 0.4097  | 299 | 0.548132484 | 0.020007921 |
| SNP_A.K_1188649_7_6035275   | 7  | 6035275  | 1.78E-06 | 0.42308 | 299 | 0.548046789 | 0.020331619 |
| SNP_A.K_1189104_7_6470836   | 7  | 6470836  | 1.79E-06 | 0.25585 | 299 | 0.548038729 | 0.020331619 |
| SNP_A.K_1188953_7_6436491   | 7  | 6436491  | 1.80E-06 | 0.24582 | 299 | 0.548010697 | 0.020385285 |
| SNP_A.K_1188956_7_6436513   | 7  | 6436513  | 1.84E-06 | 0.25753 | 299 | 0.5479477   | 0.020646928 |
| SNP_A.K_1188693_7_6049406   | 7  | 6049406  | 1.90E-06 | 0.43645 | 299 | 0.547832269 | 0.021125943 |
| SNP_A.K_1188431_7_6018616   | 7  | 6018616  | 1.90E-06 | 0.37625 | 299 | 0.54782106  | 0.021125943 |
| SNP_A.K_1188651_7_6035509   | 7  | 6035509  | 1.91E-06 | 0.43144 | 299 | 0.54781247  | 0.021125943 |
| SNP_A.K_1189116_7_6473186   | 7  | 6473186  | 1.96E-06 | 0.24582 | 299 | 0.547717172 | 0.021489987 |
| SNP_A.K_1188465_7_6020475   | 7  | 6020475  | 1.98E-06 | 0.41304 | 299 | 0.547688839 | 0.021489987 |
| SNP_A.K_1188396_7_6013857   | 7  | 6013857  | 1.99E-06 | 0.40468 | 299 | 0.547669453 | 0.021489987 |
| SNP_A.K_1189138_7_6482154   | 7  | 6482154  | 1.99E-06 | 0.25753 | 299 | 0.54766498  | 0.021489987 |
| SNP_A.K_1189182_7_6493618   | 7  | 6493618  | 1.99E-06 | 0.24749 | 299 | 0.547662357 | 0.021489987 |
| SNP_A.K_1189018_7_6441680   | 7  | 6441680  | 2.03E-06 | 0.26254 | 299 | 0.547597959 | 0.021780489 |
| SNP_A.K_1188634_7_6034804   | 7  | 6034804  | 2.04E-06 | 0.39799 | 299 | 0.547579024 | 0.021787608 |
| SNP_A.K_1188669_7_6044135   | 7  | 6044135  | 2.06E-06 | 0.42475 | 299 | 0.54754456  | 0.021893285 |
| SNP_A.K_1188560_7_6027879   | 7  | 6027879  | 2.08E-06 | 0.37793 | 299 | 0.547511221 | 0.021992918 |
| SNP_A.K_1188729_7_6060779   | 7  | 6060779  | 2.10E-06 | 0.42308 | 299 | 0.547484552 | 0.022051067 |
| SNP_A.K_196290_1_31384954   | 1  | 31384954 | 2.12E-06 | 0.199   | 299 | 0.547445939 | 0.022186373 |
| SNP_A.K_1188673_7_6044479   | 7  | 6044479  | 2.17E-06 | 0.38462 | 299 | 0.547368191 | 0.022576958 |
| SNP_A.K_1188893_7_6422590   | 7  | 6422590  | 2.20E-06 | 0.24749 | 299 | 0.547323002 | 0.022709528 |
| SNP_A.K_1921982_11_24257745 | 11 | 24257745 | 2.20E-06 | 0.1689  | 299 | 0.547313501 | 0.022709528 |
| SNP_A.K_1188631_7_6034489   | 7  | 6034489  | 2.23E-06 | 0.42642 | 299 | 0.54727031  | 0.022881529 |
| SNP_A.K_1188725_7_6058314   | 7  | 6058314  | 2.29E-06 | 0.43144 | 299 | 0.547180386 | 0.023369032 |
| SNP_A.K_1188583_7_6030616   | 7  | 6030616  | 2.39E-06 | 0.42642 | 299 | 0.547026298 | 0.02431471  |
| SNP_A.K_1188414_7_6017158   | 7  | 6017158  | 2.41E-06 | 0.4214  | 299 | 0.546997731 | 0.024397452 |
| SNP_A.K_1188486_7_6021294   | 7  | 6021294  | 2.43E-06 | 0.38127 | 299 | 0.546970631 | 0.024470676 |
| SNP_A.K_1188594_7_6031437   | 7  | 6031437  | 2.45E-06 | 0.42475 | 299 | 0.546952183 | 0.024483352 |
| SNP_A.K_1189233_7_6659795   | 7  | 6659795  | 2.53E-06 | 0.41973 | 299 | 0.546841181 | 0.025161527 |
| SNP_A.K_1188650_7_6035315   | 7  | 6035315  | 2.56E-06 | 0.41973 | 299 | 0.546795912 | 0.025371956 |
| SNP_A.K_1189054_7_6450095   | 7  | 6450095  | 2.71E-06 | 0.2709  | 299 | 0.546602636 | 0.02661312  |
| SNP_A.K_1188713_7_6051639   | 7  | 6051639  | 2.71E-06 | 0.4097  | 299 | 0.546598208 | 0.02661312  |
| SNP_A.K_1188559_7_6027876   | 7  | 6027876  | 2.73E-06 | 0.37625 | 299 | 0.546576213 | 0.026657446 |
| SNP_A.K_1188390_7_6012820   | 7  | 6012820  | 2.77E-06 | 0.38294 | 299 | 0.54652187  | 0.026869571 |
| SNP_A.K_1189241_7_6660558   | 7  | 6660558  | 2.79E-06 | 0.38294 | 299 | 0.546500579 | 0.026869571 |
| SNP_A.K_1189158_7_6486632   | 7  | 6486632  | 2.81E-06 | 0.26087 | 299 | 0.546473744 | 0.026869571 |

|                             |    |          |          |         |     |             |             |
|-----------------------------|----|----------|----------|---------|-----|-------------|-------------|
| SNP_A.K_1189019_7_6441806   | 7  | 6441806  | 2.81E-06 | 0.26254 | 299 | 0.54647082  | 0.026869571 |
| SNP_A.K_1188438_7_6019232   | 7  | 6019232  | 2.83E-06 | 0.41639 | 299 | 0.546453817 | 0.026869571 |
| SNP_A.K_1188426_7_6018103   | 7  | 6018103  | 2.83E-06 | 0.41472 | 299 | 0.546452949 | 0.026869571 |
| SNP_A.K_1188381_7_6009561   | 7  | 6009561  | 2.92E-06 | 0.41639 | 299 | 0.546337869 | 0.027654401 |
| SNP_A.K_1188882_7_6421132   | 7  | 6421132  | 3.02E-06 | 0.25753 | 299 | 0.546228702 | 0.028414305 |
| SNP_A.K_1188400_7_6014616   | 7  | 6014616  | 3.07E-06 | 0.42308 | 299 | 0.546171088 | 0.028762775 |
| SNP_A.K_1188474_7_6020808   | 7  | 6020808  | 3.09E-06 | 0.41639 | 299 | 0.546151034 | 0.02880078  |
| SNP_A.K_1188929_7_6434967   | 7  | 6434967  | 3.13E-06 | 0.2592  | 299 | 0.546099132 | 0.029107018 |
| SNP_A.K_1188410_7_6016255   | 7  | 6016255  | 3.18E-06 | 0.42308 | 299 | 0.546048105 | 0.0294097   |
| SNP_A.K_1922047_11_24262683 | 11 | 24262683 | 3.20E-06 | 0.2107  | 299 | 0.546021338 | 0.029476246 |
| SNP_A.K_1188575_7_6030070   | 7  | 6030070  | 3.21E-06 | 0.41304 | 299 | 0.546009804 | 0.029476246 |
| SNP_A.K_1189060_7_6452776   | 7  | 6452776  | 3.24E-06 | 0.26756 | 299 | 0.54598267  | 0.029578884 |
| SNP_A.K_1189058_7_6452614   | 7  | 6452614  | 3.28E-06 | 0.39298 | 299 | 0.545939004 | 0.029680888 |
| SNP_A.K_1188945_7_6436025   | 7  | 6436025  | 3.30E-06 | 0.25251 | 299 | 0.545921743 | 0.029680888 |
| SNP_A.K_1188957_7_6436531   | 7  | 6436531  | 3.31E-06 | 0.25585 | 299 | 0.545909694 | 0.029680888 |
| SNP_A.K_1188413_7_6016671   | 7  | 6016671  | 3.32E-06 | 0.41472 | 299 | 0.545897355 | 0.029680888 |
| SNP_A.K_1188958_7_6436543   | 7  | 6436543  | 3.33E-06 | 0.26087 | 299 | 0.545887767 | 0.029680888 |
| SNP_A.K_1189143_7_6482578   | 7  | 6482578  | 3.35E-06 | 0.25585 | 299 | 0.54587053  | 0.029680888 |
| SNP_A.K_1188525_7_6025219   | 7  | 6025219  | 3.35E-06 | 0.40635 | 299 | 0.545866586 | 0.029680888 |
| SNP_A.K_1188488_7_6021310   | 7  | 6021310  | 3.40E-06 | 0.32943 | 299 | 0.545815332 | 0.029885843 |
| SNP_A.K_1976796_12_8034717  | 12 | 8034717  | 3.40E-06 | 0.11706 | 299 | 0.545813675 | 0.029885843 |
| SNP_A.K_1189005_7_6440863   | 7  | 6440863  | 3.53E-06 | 0.2592  | 299 | 0.545684462 | 0.030897815 |
| SNP_A.K_1188549_7_6026617   | 7  | 6026617  | 3.56E-06 | 0.40635 | 299 | 0.545657964 | 0.031006186 |
| SNP_A.K_1188670_7_6044425   | 7  | 6044425  | 3.59E-06 | 0.41137 | 299 | 0.545629309 | 0.031134999 |
| SNP_A.K_1188807_7_6310485   | 7  | 6310485  | 3.62E-06 | 0.38127 | 299 | 0.54560299  | 0.031243707 |
| SNP_A.K_1188527_7_6025253   | 7  | 6025253  | 3.71E-06 | 0.39799 | 299 | 0.545516552 | 0.031853009 |
| SNP_A.K_1188952_7_6436489   | 7  | 6436489  | 3.72E-06 | 0.24749 | 299 | 0.545508045 | 0.031853009 |
| SNP_A.K_1188613_7_6032582   | 7  | 6032582  | 3.82E-06 | 0.4214  | 299 | 0.545415138 | 0.032590437 |
| SNP_A.K_1188473_7_6020754   | 7  | 6020754  | 3.92E-06 | 0.41639 | 299 | 0.545322877 | 0.033339474 |
| SNP_A.K_1188534_7_6025564   | 7  | 6025564  | 3.96E-06 | 0.40468 | 299 | 0.545287798 | 0.033544248 |
| SNP_A.K_1189110_7_6472614   | 7  | 6472614  | 4.05E-06 | 0.2592  | 299 | 0.545214314 | 0.034129836 |
| SNP_A.K_1188648_7_6035256   | 7  | 6035256  | 4.17E-06 | 0.4214  | 299 | 0.545115398 | 0.034984177 |
| SNP_A.K_1188427_7_6018134   | 7  | 6018134  | 4.39E-06 | 0.41639 | 299 | 0.544938786 | 0.036592271 |
| SNP_A.K_1188681_7_6046537   | 7  | 6046537  | 4.39E-06 | 0.44816 | 299 | 0.544933307 | 0.036592271 |
| SNP_A.K_1188533_7_6025559   | 7  | 6025559  | 4.42E-06 | 0.40468 | 299 | 0.544912913 | 0.036661869 |
| SNP_A.K_1980397_12_9074823  | 12 | 9074823  | 4.44E-06 | 0.09365 | 299 | 0.544899396 | 0.036661869 |
| SNP_A.K_1976362_12_7992926  | 12 | 7992926  | 4.49E-06 | 0.06689 | 299 | 0.544856659 | 0.036974002 |
| SNP_A.K_1188409_7_6015931   | 7  | 6015931  | 4.60E-06 | 0.41639 | 299 | 0.544775969 | 0.037703707 |
| SNP_A.K_1188432_7_6018663   | 7  | 6018663  | 4.84E-06 | 0.4214  | 299 | 0.544603448 | 0.039490786 |
| SNP_A.K_1188601_7_6031939   | 7  | 6031939  | 4.89E-06 | 0.41639 | 299 | 0.544569492 | 0.039727541 |
| SNP_A.K_1188664_7_6041779   | 7  | 6041779  | 4.94E-06 | 0.42308 | 299 | 0.54452834  | 0.040050229 |
| SNP_A.K_1188627_7_6034001   | 7  | 6034001  | 4.98E-06 | 0.42977 | 299 | 0.54450591  | 0.040156567 |
| SNP_A.K_1188927_7_6434767   | 7  | 6434767  | 5.09E-06 | 0.27425 | 299 | 0.544429907 | 0.040870909 |
| SNP_A.K_1188457_7_6020338   | 7  | 6020338  | 5.12E-06 | 0.40134 | 299 | 0.544411762 | 0.040870909 |
| SNP_A.K_1189184_7_6493946   | 7  | 6493946  | 5.12E-06 | 0.2592  | 299 | 0.544405728 | 0.040870909 |
| SNP_A.K_1188819_7_6356872   | 7  | 6356872  | 5.16E-06 | 0.36957 | 299 | 0.544379697 | 0.040941341 |
| SNP_A.K_1188970_7_6437983   | 7  | 6437983  | 5.17E-06 | 0.26421 | 299 | 0.544373629 | 0.040941341 |
| SNP_A.K_1978694_12_8875824  | 12 | 8875824  | 5.29E-06 | 0.08361 | 299 | 0.544299935 | 0.041444788 |
| SNP_A.K_1188428_7_6018250   | 7  | 6018250  | 5.29E-06 | 0.41806 | 299 | 0.544297449 | 0.041444788 |
| SNP_A.K_1976632_12_8020430  | 12 | 8020430  | 5.32E-06 | 0.0903  | 299 | 0.544279995 | 0.041444788 |

|                             |    |          |          |         |     |             |             |
|-----------------------------|----|----------|----------|---------|-----|-------------|-------------|
| SNP_A.K_1188731_7_6061934   | 7  | 6061934  | 5.32E-06 | 0.4214  | 299 | 0.544275698 | 0.041444788 |
| SNP_A.K_1188966_7_6436877   | 7  | 6436877  | 5.34E-06 | 0.25418 | 299 | 0.544267102 | 0.041444788 |
| SNP_A.K_1980333_12_9070375  | 12 | 9070375  | 5.36E-06 | 0.08696 | 299 | 0.544252245 | 0.04146997  |
| SNP_A.K_1188694_7_6049467   | 7  | 6049467  | 5.46E-06 | 0.4398  | 299 | 0.544191082 | 0.042000912 |
| SNP_A.K_1189179_7_6493365   | 7  | 6493365  | 5.50E-06 | 0.25084 | 299 | 0.54416564  | 0.042000912 |
| SNP_A.K_1188462_7_6020459   | 7  | 6020459  | 5.50E-06 | 0.41137 | 299 | 0.544164867 | 0.042000912 |
| SNP_A.K_1188397_7_6014141   | 7  | 6014141  | 5.52E-06 | 0.40635 | 299 | 0.544151699 | 0.042000912 |
| SNP_A.K_1188402_7_6014760   | 7  | 6014760  | 5.53E-06 | 0.41806 | 299 | 0.544145469 | 0.042000912 |
| SNP_A.K_1188637_7_6034881   | 7  | 6034881  | 5.59E-06 | 0.4097  | 299 | 0.544108156 | 0.042306127 |
| SNP_A.K_1980436_12_9077045  | 12 | 9077045  | 5.65E-06 | 0.08027 | 299 | 0.544070703 | 0.042615921 |
| SNP_A.K_1188412_7_6016537   | 7  | 6016537  | 5.67E-06 | 0.41639 | 299 | 0.54405732  | 0.042628189 |
| SNP_A.K_1188524_7_6025199   | 7  | 6025199  | 5.73E-06 | 0.41304 | 299 | 0.544023405 | 0.042897223 |
| SNP_A.K_1188379_7_6009473   | 7  | 6009473  | 5.76E-06 | 0.41973 | 299 | 0.544005539 | 0.042966878 |
| SNP_A.K_1188596_7_6031719   | 7  | 6031719  | 5.84E-06 | 0.42308 | 299 | 0.543957757 | 0.043414573 |
| SNP_A.K_1189129_7_6479712   | 7  | 6479712  | 5.87E-06 | 0.20903 | 299 | 0.543940733 | 0.043475537 |
| SNP_A.K_1188600_7_6031936   | 7  | 6031936  | 5.94E-06 | 0.41304 | 299 | 0.543898446 | 0.043859359 |
| SNP_A.K_1188500_7_6022211   | 7  | 6022211  | 6.14E-06 | 0.38127 | 299 | 0.543787827 | 0.04509114  |
| SNP_A.K_1188680_7_6046495   | 7  | 6046495  | 6.15E-06 | 0.4214  | 299 | 0.543779363 | 0.04509114  |
| SNP_A.K_1188481_7_6021119   | 7  | 6021119  | 6.19E-06 | 0.41137 | 299 | 0.543756547 | 0.045142055 |
| SNP_A.K_254578_1_41048790   | 1  | 41048790 | 6.20E-06 | 0.41472 | 299 | 0.543751466 | 0.045142055 |
| SNP_A.K_1980241_12_9067475  | 12 | 9067475  | 6.24E-06 | 0.0903  | 299 | 0.543733421 | 0.045222432 |
| SNP_A.K_1188453_7_6020005   | 7  | 6020005  | 6.39E-06 | 0.4097  | 299 | 0.543649489 | 0.046183787 |
| SNP_A.K_1980196_12_9065692  | 12 | 9065692  | 6.56E-06 | 0.09532 | 299 | 0.543560862 | 0.047008616 |
| SNP_A.K_925899_5_19753862   | 5  | 19753862 | 6.57E-06 | 0.44314 | 299 | 0.543556719 | 0.047008616 |
| SNP_A.K_1188417_7_6017576   | 7  | 6017576  | 6.58E-06 | 0.41806 | 299 | 0.543546768 | 0.047008616 |
| SNP_A.K_1188542_7_6025907   | 7  | 6025907  | 6.59E-06 | 0.40635 | 299 | 0.543541683 | 0.047008616 |
| SNP_A.K_1979774_12_8963385  | 12 | 8963385  | 6.63E-06 | 0.09197 | 299 | 0.543523849 | 0.047092957 |
| SNP_A.K_1188946_7_6436307   | 7  | 6436307  | 6.75E-06 | 0.26923 | 299 | 0.543459605 | 0.047718853 |
| SNP_A.K_1188458_7_6020348   | 7  | 6020348  | 6.76E-06 | 0.40635 | 299 | 0.543455393 | 0.047718853 |
| SNP_A.K_1188630_7_6034470   | 7  | 6034470  | 6.81E-06 | 0.41973 | 299 | 0.543432297 | 0.047879769 |
| SNP_A.K_1922066_11_24263921 | 11 | 24263921 | 6.88E-06 | 0.20569 | 299 | 0.543395011 | 0.048127595 |
| SNP_A.K_1189038_7_6443328   | 7  | 6443328  | 6.89E-06 | 0.2709  | 299 | 0.543391598 | 0.048127595 |
| SNP_A.K_1189123_7_6474113   | 7  | 6474113  | 6.92E-06 | 0.26923 | 299 | 0.543374843 | 0.048202165 |
| SNP_A.K_1189094_7_6467839   | 7  | 6467839  | 6.97E-06 | 0.25585 | 299 | 0.54335123  | 0.048374283 |
| SNP_A.K_1188632_7_6034699   | 7  | 6034699  | 7.06E-06 | 0.41137 | 299 | 0.543307262 | 0.04883739  |
| SNP_A.K_1188991_7_6439209   | 7  | 6439209  | 7.18E-06 | 0.26254 | 299 | 0.543249809 | 0.049363331 |
| SNP_A.K_1189115_7_6473151   | 7  | 6473151  | 7.19E-06 | 0.25753 | 299 | 0.543247985 | 0.049363331 |
| SNP_A.K_1188418_7_6017581   | 7  | 6017581  | 7.21E-06 | 0.42475 | 299 | 0.543235091 | 0.049386844 |
| SNP_A.K_1188606_7_6032141   | 7  | 6032141  | 7.26E-06 | 0.41973 | 299 | 0.543212195 | 0.049442333 |
| SNP_A.K_1189142_7_6482564   | 7  | 6482564  | 7.27E-06 | 0.2592  | 299 | 0.543208832 | 0.049442333 |
